# Supplementary material for: Reaction hijacking inhibition of Plasmodium falciparum asparagine tRNA synthetase
Source: Research Square preprint supplement (doi:10.21203/rs.3.rs-3198291/v1), 2023-07-27
Supplement: Supplementary file 1 [file 07a0ab0dccd5274bf60e7a73.xlsx]

## Sheet: Sheet1
Gene ID	Gene Name	Fold gain in copy number on Chromosome 6
		F3	G7
PF3D7_0601700	Plasmodium exported protein (PHISTa), unknown function, pseudogene	NA	1.95
PF3D7_0601800	H/ACA snoRNA	NA	1.95
PF3D7_0601900	conserved Plasmodium protein, unknown function	NA	1.95
PF3D7_0602000	zinc finger protein, putative	NA	1.95
PF3D7_0602100	ATP-dependent RNA helicase MTR4	NA	1.95
PF3D7_0602200	MYND-type zinc finger protein, putative	NA	1.95
PF3D7_0602300	liver merozoite formation protein, putative	NA	1.95
PF3D7_0602400	elongation factor G	1.41	1.95
PF3D7_0602500	geranylgeranyl transferase type-2 subunit beta, putative	1.41	1.95
PF3D7_0602600	SAC3 domain-containing protein, putative	1.41	1.95
PF3D7_0602700	conserved Plasmodium protein, unknown function	1.41	1.95
PF3D7_0602800	JmjC domain-containing protein, putative	1.41	1.95
PF3D7_0602900	conserved Plasmodium protein, unknown function	1.41	1.95
PF3D7_0603000	SDE2 domain-containing protein, putative	1.41	1.95
PF3D7_0603100	RNA-binding protein, putative	1.41	1.95
PF3D7_0603200	mitochondrial chaperone BCS1, putative	1.41	1.95
PF3D7_0603300	dihydroorotate dehydrogenase	1.41	1.95
PF3D7_0603400	trophozoite exported protein 1	1.41	1.95
PF3D7_0603500	cation/H antiporter	NA	1.95
PF3D7_0603600	AT-rich interactive domain-containing protein, putative	NA	1.95
PF3D7_0603700	phenylalanine--tRNA ligase	NA	1.95
PF3D7_0603800	centrosomal protein CEP76, putative	NA	1.95
PF3D7_0603900	conserved Plasmodium protein, unknown function	NA	1.95
PF3D7_0604000	conserved Plasmodium protein, unknown function	NA	1.95
PF3D7_0604100	AP2 domain transcription factor	NA	1.95
PF3D7_0604200	ribosomal protein L41, mitochondrial, putative	NA	1.95
PF3D7_0604300	conserved Plasmodium protein, unknown function	NA	1.95
PF3D7_0604400	conserved protein, unknown function	NA	1.95
PF3D7_0604500	GYF domain-containing protein, putative	NA	1.95
PF3D7_0604600	DNA helicase, putative	NA	1.95
PF3D7_0604700	glyoxalase I-like protein GILP	NA	1.95
PF3D7_0604800	RAP protein, putative	NA	1.95
PF3D7_0604900	conserved Plasmodium protein, unknown function	NA	1.95
PF3D7_0605000	50S ribosomal protein L24, putative	NA	1.95
PF3D7_0605100	RNA-binding protein, putative	NA	1.95
PF3D7_0605200	acylphosphatase, putative	NA	1.95
PF3D7_0605300	serine/threonine protein kinase ARK1	NA	1.95
PF3D7_0605400	calcium-binding protein, putative	NA	1.95
PF3D7_0605500	cyclin dependent kinase binding protein, putative	NA	1.95
PF3D7_0605600	nucleoside diphosphate kinase, putative	NA	1.95
PF3D7_0605700	conserved Plasmodium protein, unknown function	NA	1.95
PF3D7_0605800	DNA repair protein RAD50, putative	NA	1.95
PF3D7_0605900	elongation of fatty acids protein, putative	NA	1.95
PF3D7_0606000	protein KIC1	NA	1.95
PF3D7_0606100	RNA-binding protein, putative	NA	1.95
PF3D7_0606200	ubiquitin-conjugating enzyme E2 PEX4, putative	NA	1.95
PF3D7_0606300	conserved Plasmodium protein, unknown function	NA	1.95
PF3D7_0606400	conserved Plasmodium protein, unknown function	NA	1.95
PF3D7_0606500	polypyrimidine tract-binding protein, putative	NA	1.95
PF3D7_0606600	conserved Plasmodium protein, unknown function	NA	1.95
PF3D7_0606700	coatomer alpha subunit, putative	NA	1.95
PF3D7_0606800	VFT protein	NA	1.95
PF3D7_0606900	glutaredoxin-like protein	NA	1.95
PF3D7_0607000	translation initiation factor IF-2, putative	NA	1.95
PF3D7_0607100	MYND-type zinc finger protein, putative	NA	1.95
PF3D7_0607200	RING zinc finger protein, putative	NA	1.95
PF3D7_0607300	uroporphyrinogen III decarboxylase	NA	1.95
PF3D7_0607400	G-protein associated signal transduction protein, putative	NA	1.95
PF3D7_0607500	4-hydroxybenzoate polyprenyltransferase, putative	NA	1.95
PF3D7_0607600	spindle assembly abnormal protein 6, putative	NA	1.95
PF3D7_0607700	conserved Plasmodium protein, unknown function	NA	1.95
PF3D7_0607800	GTP-binding protein, putative	NA	1.95
PF3D7_0607900	conserved Plasmodium protein, unknown function	NA	1.95
PF3D7_0608000	diphthine methyltransferase, putative	NA	1.95
PF3D7_0608100	conserved Plasmodium protein, unknown function	NA	1.95
PF3D7_0608200	conserved Plasmodium protein, unknown function	NA	1.95
PF3D7_0608300	heptatricopeptide repeat-containing protein, putative	NA	1.95
PF3D7_0608310	sorting assembly machinery 50 kDa subunit, putative	NA	1.95
PF3D7_0608400	conserved Plasmodium protein, unknown function	NA	1.95
PF3D7_0608500	proteasome subunit alpha type-2, putative	NA	1.95
PF3D7_0608600	conserved Plasmodium protein, unknown function	NA	1.95
PF3D7_0608700	T-complex protein 1 subunit zeta	NA	1.95
PF3D7_0608800	ornithine aminotransferase	NA	1.95
PF3D7_0608900	conserved Plasmodium protein, unknown function	NA	1.95
PF3D7_0609000	nucleoporin NUP637, putative	NA	1.95
PF3D7_0609100	zinc transporter ZIP1, putative	NA	1.95
PF3D7_0609200	citrate synthase-like protein, putative	NA	1.95
PF3D7_0609300	conserved Plasmodium protein, unknown function	NA	1.95
PF3D7_0609400	mitochondrial cardiolipin synthase, putative	NA	1.95
PF3D7_0609500	conserved Plasmodium protein, unknown function	NA	1.95
PF3D7_0609600	conserved Plasmodium protein, unknown function	NA	1.95
PF3D7_0609700	protein KIC6	NA	1.95
PF3D7_0609800	palmitoyltransferase DHHC2, putative	NA	1.95
PF3D7_0609900	conserved Plasmodium protein, unknown function	NA	1.95
PF3D7_0610000	ribosomal protein L19, mitochondrial, putative	NA	1.95
PF3D7_0610100	pre-mRNA-splicing factor SLU7, putative	NA	1.95
PF3D7_0610200	RNA-binding protein 25, putative	NA	1.95
PF3D7_0610300	non-coding RNA	NA	1.95
PF3D7_0610400	histone H3	NA	1.95
PF3D7_0610500	peptidyl-tRNA hydrolase PTRHD1, putative	NA	1.95
PF3D7_0610600	calcium-dependent protein kinase 2	NA	1.95
PF3D7_0610700	conserved Plasmodium protein, unknown function	NA	1.95
PF3D7_0610800	transketolase	NA	1.95
PF3D7_0610900	transcription elongation factor SPT5, putative	NA	1.95
PF3D7_0611000	SNARE associated Golgi protein, putative	NA	1.95
PF3D7_0611100	succinate dehydrogenase subunit 3, putative	NA	1.95
PF3D7_0611200	AP2 domain transcription factor, putative	NA	1.95
PF3D7_0611300	ATP synthase-associated protein, putative	NA	1.95
PF3D7_0611400	SWI/SNF-related matrix-associated actin-dependent regulator of chromatin	NA	1.95
PF3D7_0611500	conserved protein, unknown function	NA	1.95
PF3D7_0611600	basal complex transmembrane protein 1	NA	1.95
PF3D7_0611700	60S ribosomal protein L39	NA	1.95
PF3D7_0611800	conserved Plasmodium protein, unknown function	NA	1.95
PF3D7_0611900	lsm12, putative	NA	1.95
