# Supplementary material for: Reaction hijacking inhibition of Plasmodium falciparum asparagine tRNA synthetase
Source: Research Square preprint supplement (doi:10.21203/rs.3.rs-3198291/v1), 2023-07-27
Supplement: Supplementary file 2 [file 38455d156ff05c29d0b80c23.xlsx]

## Sheet: Dd2 selections
Supplementary Data C. CNV analyses in Dd2 and 3D7 parasites selected with OSM-106. Values reported are the Log2 Denoised Copy Ratios calculated against a strain-matched panel of normals following the GATK 4.0 CNV pipeline.
CONTIG	START	END	Gene_ID	Gene_Description	Goldberg-Dd2-B2-Parent-11-2018	Goldberg-Dd2-OSM-S-106-3-E5	Goldberg-Dd2-OSM-S-106-3-H7		Goldberg-Dd2-B2-Parent-12-2020	Goldberg-OSM-S-106-Dd2-clone2A6	Goldberg-OSM-S-106-Dd2-clone2A9	Goldberg-OSM-S-106-Dd2-clone2B2	Goldberg-OSM-S-106-Dd2-clone2D6
Pf3D7_01_v3	92863	94125	PF3D7_0102000	Plasmodium exported protein (PHISTa), unknown function, pseudogene	-0.003884	0.126654	0.155271		-0.070032	-0.117707	0.463936	0.020047	-0.070656		Conditional Formatting of Cells
Pf3D7_01_v3	94800	96149	PF3D7_0102100	stevor, pseudogene	-0.003605	0.017439	0.096337		-0.008202	0.006012	0.496986	-0.046546	0.111433			amplification (copy gain)	0.6
Pf3D7_01_v3	98569	102532	PF3D7_0102200	ring-infected erythrocyte surface antigen	-0.00078	-0.065411	-0.04425		0.021981	0.070162	0.137165	-0.033354	0.075357			neutral	0
Pf3D7_01_v3	104454	105459	PF3D7_0102300	Plasmodium exported protein, unknown function	-0.058186	0.028906	0.075439		0.031948	-0.046736	0.18291	-0.040685	-0.055479			deamplification (copy loss)	-0.6
Pf3D7_01_v3	106947	108598	PF3D7_0102400	lysophospholipase, putative, pseudogene	0.015666	0.013745	0.014268		0.031711	0.085973	0.113749	-0.059401	0.014037		GATK 4.0 CNV Pipeline: Values reported are the Log2 Denoised Copy Ratio calculated across our Dd2 panel of normals (constructed from non-drug-selected Dd2 parents).
Pf3D7_01_v3	110500	116049	PF3D7_0102500	erythrocyte binding antigen-181	-0.005362	0.062708	0.108359		-0.008676	0.018047	0.13711	0.024143	0.03453
Pf3D7_01_v3	118791	121499	PF3D7_0102600	serine/threonine protein kinase, FIKK family	-0.013886	0.049398	0.053191		0.041546	0.042435	0.076116	-0.020638	-0.013651
Pf3D7_01_v3	124267	125734	PF3D7_0102700	merozoite-associated tryptophan-rich antigen	-0.026464	-0.042779	-0.057133		0.017746	0.007949	0.10082	0.040199	0.007657
Pf3D7_01_v3	126068	128391	PF3D7_0102800	seipin domain-containing protein, putative	0.037413	0.012286	0.048912		-0.096613	-0.053835	0.117407	0.029886	-0.0868
Pf3D7_01_v3	128710	131090	PF3D7_0102900	aspartate--tRNA ligase	-0.025832	-0.090515	-0.001718		-0.052856	-0.069239	-0.029515	0.03534	-0.112981
Pf3D7_01_v3	131836	133874	PF3D7_0103000	vacuolar protein sorting-associated protein VTA1, putative	-0.017825	0.107877	0.130046		-0.055076	-0.001243	-0.053426	-0.110446	-0.038983
Pf3D7_01_v3	134103	139507	PF3D7_0103100	vacuolar protein sorting-associated protein 51, putative	-0.003508	-0.045537	-0.044315		0.003499	-0.033694	-0.040418	-0.061005	-0.038575
Pf3D7_01_v3	140412	142469	PF3D7_0103200	nucleoside transporter 4	-3.8e-05	-0.021123	-0.067134		-0.047776	-0.076471	-0.000475	-0.07937	-0.18975
Pf3D7_01_v3	143390	146646	PF3D7_0103300	conserved protein, unknown function	-0.013984	-0.039564	-0.053551		-0.066931	-0.064565	-0.051778	-0.129409	-0.082939
Pf3D7_01_v3	147665	153027	PF3D7_0103400	zinc-carboxypeptidase, putative	-0.004111	0.043348	-0.00025		-0.031278	-0.064285	-0.103553	-0.081963	-0.029396
Pf3D7_01_v3	153926	160676	PF3D7_0103500	conserved Plasmodium protein, unknown function	-0.008968	-0.012743	-0.044196		0.019308	-0.076365	-0.062777	-0.049944	-0.031957
Pf3D7_01_v3	160881	166371	PF3D7_0103600	ATP-dependent RNA helicase, putative	-0.010896	0.008722	0.079688		-0.029814	-0.091915	0.055796	-0.046399	-0.028603
Pf3D7_01_v3	166372	168883	PF3D7_0103700	L-seryl-tRNA(Sec) kinase, putative	-0.044216	0.026613	-0.017836		-0.020087	-0.026157	0.04202	0.062972	-0.033487
Pf3D7_01_v3	168884	171523	PF3D7_0103800	actin-related protein	-0.003186	-0.028686	-0.025359		-0.086728	-0.125872	-0.010603	-0.095532	-0.075179
Pf3D7_01_v3	172614	174841	PF3D7_0103900	parasite-infected erythrocyte surface protein	-0.033809	-0.00414	0.06375		-0.072098	-0.107926	-0.118409	-0.130085	-0.142791
Pf3D7_01_v3	175359	176626	PF3D7_0104000	thrombospondin-related sporozoite protein	-0.029105	-0.065687	-0.078193		0.061674	-0.022995	-0.001339	0.031289	0.023544
Pf3D7_01_v3	177837	181040	PF3D7_0104100	conserved Plasmodium membrane protein, unknown function	0.015888	0.054521	-0.033629		0.023754	-0.091245	-0.000647	-0.060308	0.002936
Pf3D7_01_v3	182572	184472	PF3D7_0104200	StAR-related lipid transfer protein	-0.01378	-0.066447	-0.085093		-0.014636	-0.089284	-0.011582	-0.022459	-0.091533
Pf3D7_01_v3	190019	201480	PF3D7_0104300	ubiquitin carboxyl-terminal hydrolase 1, putative	-0.006483	-0.020053	-0.022627		-0.008734	-0.035061	0.006464	-0.02244	-0.020308
Pf3D7_01_v3	202286	204382	PF3D7_0104400	4-hydroxy-3-methylbut-2-enyl diphosphate reductase	-0.029355	-0.009774	0.076299		0.064381	0.078317	0.003394	-0.026379	0.1616
Pf3D7_01_v3	204383	205705	PF3D7_0104500	conserved protein, unknown function	-0.012763	0.046508	0.071233		-0.067064	-0.027004	-0.167496	-0.054121	-0.058313
Pf3D7_01_v3	205920	210439	PF3D7_0104600	conserved Plasmodium protein, unknown function	-0.019448	0.062942	0.041395		-0.03023	-0.011575	0.00823	-0.005438	-0.023244
Pf3D7_01_v3	210620	213255	PF3D7_0104700	major facilitator superfamily-related transporter, putative	-0.013587	-0.039875	-0.003033		-0.000161	0.02652	0.010248	0.009868	0.028525
Pf3D7_01_v3	215526	217759	PF3D7_0104800	novel putative transporter 1, putative	-0.005444	0.003749	0.008896		-0.008215	-0.136077	-0.036513	-0.050786	-0.032554
Pf3D7_01_v3	220952	221883	PF3D7_0105100	conserved Apicomplexan protein, unknown function	0.026934	0.198749	-0.068334		0.090276	0.018651	0.007596	0.106234	0.033949
Pf3D7_01_v3	222004	224210	PF3D7_0105200	heptatricopeptide repeat and RAP domain-containing protein, putative	0.009544	-0.072108	-0.078759		0.081665	0.007413	0.048286	-0.021102	-0.027798
Pf3D7_01_v3	224860	226029	PF3D7_0105300	cyclase-associated protein	0.01243	-0.077062	0.05328		-0.0193	-0.040911	0.018765	0.165979	0.104576
Pf3D7_01_v3	226431	227535	PF3D7_0105400	conserved Plasmodium protein, unknown function	0.023153	0.000781	0.016135		-0.070611	-0.09737	-0.055819	-0.093562	-0.11151
Pf3D7_01_v3	228235	229769	PF3D7_0105500	conserved protein, unknown function	0.015209	-0.068504	-0.035282		0.076331	0.129801	0.113568	0.100347	0.089772
Pf3D7_01_v3	230039	234652	PF3D7_0105600	conserved Plasmodium protein, unknown function	0.010916	0.057582	0.120345		0.041792	0.017198	0.000104	0.048622	0.066681
Pf3D7_01_v3	238416	248107	PF3D7_0105700	asparagine-rich antigen Pfa35-2	-0.007322	0.0286	0.040995		0.026332	0.019117	-0.056227	0.037808	0.005151
Pf3D7_01_v3	248981	252260	PF3D7_0105800	cyclin-dependent kinases regulatory subunit, putative	-0.015655	0.022405	0.006987		-0.038476	0.031852	-0.128978	0.019248	-0.011621
Pf3D7_01_v3	253334	255180	PF3D7_0105900	3'-5' exonuclease, putative	-0.02896	-0.056082	0.012763		0.021972	0.003723	-0.072936	0.037198	0.041007
Pf3D7_01_v3	255525	258793	PF3D7_0106000	conserved protein, unknown function	-0.014635	-0.078977	-0.057601		0.051549	-0.01515	-0.117495	0.008636	-0.005344
Pf3D7_01_v3	260408	262059	PF3D7_0106100	V-type proton ATPase subunit C, putative	-0.030048	-0.031299	0.038817		0.04334	0.054787	0.02141	0.055174	0.101304
Pf3D7_01_v3	263090	264473	PF3D7_0106200	EF hand domain-containing protein, putative	-0.015167	0.133164	0.12471		0.00685	-0.085957	-0.036383	-0.004882	0.0502
Pf3D7_01_v3	264958	269423	PF3D7_0106300	calcium-transporting ATPase	0.001901	0.017831	0.02354		-0.01481	0.03859	-0.032759	0.043751	0.006001
Pf3D7_01_v3	272204	273654	PF3D7_0106400	pre-rRNA-processing protein TSR2, putative	-0.017775	0.110339	0.123736		0.002407	0.144596	0.171671	0.034645	0.070808
Pf3D7_01_v3	274065	278800	PF3D7_0106500	conserved Plasmodium protein, unknown function	0.018021	-0.042746	0.011291		-0.06952	0.00166	-0.063385	-0.023995	-0.046284
Pf3D7_01_v3	278865	280264	PF3D7_0106600	conserved Plasmodium protein, unknown function	-0.041339	0.168888	0.117909		0.113038	0.122872	0.001235	0.03908	0.067358
Pf3D7_01_v3	280905	285709	PF3D7_0106700	small ribosomal subunit assembling AARP2 protein	0.012363	-0.027957	0.008379		0.053845	0.042215	0.030275	0.006181	0.014155
Pf3D7_01_v3	286701	289168	PF3D7_0106800	ras-related protein Rab-5C	-0.010532	-0.088579	0.110877		-0.037283	0.004831	0.019306	0.024872	0.067457
Pf3D7_01_v3	290136	292840	PF3D7_0106900	2-C-methyl-D-erythritol 4-phosphate cytidylyltransferase, putative	0.003432	-0.055648	-0.047031		0.049426	-0.070568	-0.065513	-0.018019	0.067142
Pf3D7_01_v3	293392	295134	PF3D7_0107000	centrin-1	0.072986	0.117341	-0.024712		0.007378	0.028553	-0.009393	0.177819	0.097108
Pf3D7_01_v3	295135	297146	PF3D7_0107100	conserved protein, unknown function	0.00557	0.017318	0.037874		-0.087352	-0.02505	0.05888	0.051691	-0.006201
Pf3D7_01_v3	297147	299479	PF3D7_0107200	CCR4 domain-containing protein 3, putative	-0.010648	0.018959	0.009		0.013449	0.05635	0.047023	0.092144	0.128987
Pf3D7_01_v3	299480	301118	PF3D7_0107300	conserved Plasmodium protein, unknown function	-0.039359	-0.001223	0.0025		0.081193	0.094141	0.051996	0.079215	0.105018
Pf3D7_01_v3	302687	303648	PF3D7_0107400	ATP synthase-associated protein, putative	-0.021454	0.054329	0.072397		-0.027381	-0.037688	-0.001955	0.076304	0.007183
Pf3D7_01_v3	304112	309507	PF3D7_0107500	Niemann-Pick type C1-related protein	0.014074	-0.117746	-0.056085		0.025545	0.029767	-0.065971	0.037833	0.04878
Pf3D7_01_v3	314368	319655	PF3D7_0107600	eukaryotic translation initiation factor 2-alpha kinase 2, putative	0.002572	-0.065063	-0.020592		-0.013249	-0.000595	-0.001314	0.039763	0.104481
Pf3D7_01_v3	319918	321758	PF3D7_0107700	dolichyl-diphosphooligosaccharide--protein glycosyltransferase subunit OST3/OST6, putative	-0.021547	-0.099557	-0.042749		0.131115	0.085759	-0.020831	0.142972	0.206774
Pf3D7_01_v3	322121	326234	PF3D7_0107800	double-strand break repair protein MRE11	0.000591	0.018205	0.022681		-0.029356	-0.051301	-0.068461	-0.022347	-0.001411
Pf3D7_01_v3	326235	327474	PF3D7_0107900	conserved Plasmodium protein, unknown function	0.010167	-0.054159	0.033966		0.077665	0.102646	0.020029	0.04773	0.139021
Pf3D7_01_v3	328181	329808	PF3D7_0108000	proteasome subunit beta type-3, putative	-0.015158	0.040352	0.012674		-0.01115	0.023647	-0.17155	0.014345	0.026688
Pf3D7_01_v3	330488	332958	PF3D7_0108100	conserved protein, unknown function	-0.001842	-0.041872	-0.01834		-0.052775	0.044184	-0.032795	0.047289	0.034854
Pf3D7_01_v3	336918	344083	PF3D7_0108300	conserved Plasmodium protein, unknown function	-0.002561	0.045138	-0.00665		-0.051574	0.031262	-0.107219	-0.028221	0.001205
Pf3D7_01_v3	344150	346790	PF3D7_0108400	mitochondrial carrier protein, putative	-0.001328	-0.028725	-0.170701		0.121928	0.063689	-0.139828	0.066977	0.057254
Pf3D7_01_v3	348920	349852	PF3D7_0108500	conserved Plasmodium protein, unknown function	0.00035	-0.18218	0.038317		0.077862	0.138791	-0.076684	0.084366	0.171648
Pf3D7_01_v3	349853	351876	PF3D7_0108600	conserved protein, unknown function	0.017965	0.071517	0.017786		0.04119	0.099448	0.019662	0.03206	0.059831
Pf3D7_01_v3	352064	356461	PF3D7_0108700	secreted ookinete protein, putative	-0.008829	0.059966	0.043307		-0.04427	-0.014058	-0.076859	-0.037075	-0.040128
Pf3D7_01_v3	357584	360589	PF3D7_0108800	mitochondrial carrier protein, putative	-0.030154	-0.109124	-0.081689		0.143763	0.088686	0.025167	0.074398	0.028516
Pf3D7_01_v3	363068	364242	PF3D7_0109000	photosensitized INA-labeled protein PHIL1	-0.008356	0.053399	0.040778		-0.031968	-0.025662	-0.178338	-0.014616	0.018926
Pf3D7_01_v3	365360	369045	PF3D7_0109100	LCCL domain-containing protein	-0.018735	0.040976	0.036162		0.048088	0.008039	-0.033555	0.001406	0.086942
Pf3D7_01_v3	369230	370428	PF3D7_0109200	cleavage and polyadenylation specificity factor subunit 5, putative	-0.025044	0.039301	0.062237		0.068593	0.03983	-0.011352	0.004692	0.055734
Pf3D7_01_v3	371565	373262	PF3D7_0109300	fatty acid elongation protein, GNS1/SUR4 family, putative	0.007969	-0.17933	-0.075841		0.071628	-0.090532	-0.005615	-0.030141	0.043068
Pf3D7_01_v3	374189	375337	PF3D7_0109400	tubulin-specific chaperone a, putative	-0.026653	0.070869	0.194305		-0.072835	0.082121	0.112391	-0.010388	-0.001603
Pf3D7_01_v3	376044	377254	PF3D7_0109500	N-acetyltransferase, GNAT family, putative	0.025881	-0.183542	-0.134704		0.049819	0.047763	-0.087301	0.002967	-0.006687
Pf3D7_01_v3	380447	382674	PF3D7_0109800	phenylalanine--tRNA ligase alpha subunit	0.005557	-0.115834	-0.018855		-0.080766	-0.022608	0.020551	-0.065084	-0.010121
Pf3D7_01_v3	383034	388156	PF3D7_0109850	phosphatidate cytidylyltransferase, putative	0.007259	-0.042106	-0.066426		-0.004359	0.073064	0.06384	0.070389	0.059011
Pf3D7_01_v3	388157	389168	PF3D7_0110000	conserved Plasmodium protein, unknown function	-0.037088	0.049908	0.119865		-0.160975	-0.042255	-0.102041	-0.039659	-0.033525
Pf3D7_01_v3	389169	392315	PF3D7_0110100	selenocysteine-specific elongation factor, putative	0.005042	-0.109369	-0.0487		-0.030752	-0.016428	-0.015302	0.015627	-0.143175
Pf3D7_01_v3	392354	393125	PF3D7_0110200	FAD-linked sulfhydryl oxidase ERV1, putative	0.033546	0.111481	0.222935		-0.093782	-0.0911	0.127289	0.002692	-0.07153
Pf3D7_01_v3	393683	395085	PF3D7_0110400	DNA-directed RNA polymerase II subunit RPB9, putative	-0.001704	-0.028216	0.01036		0.030448	-0.065786	-0.170021	-0.035657	-0.134389
Pf3D7_01_v3	396341	403856	PF3D7_0110500	bromodomain protein, putative	-0.01761	0.002308	0.01933		-0.068098	-0.062339	-0.064731	-0.010809	-0.072334
Pf3D7_01_v3	405489	412419	PF3D7_0110600	phosphatidylinositol-4-phosphate 5-kinase	-0.017868	-0.027213	-0.029596		-0.016772	-0.09293	-0.00172	0.011413	-0.071346
Pf3D7_01_v3	413510	415350	PF3D7_0110700	chromatin assembly factor 1 protein WD40 domain, putative	0.008598	-0.093315	-0.057387		-0.015906	-0.064338	-0.005107	0.005945	0.051647
Pf3D7_01_v3	417671	419857	PF3D7_0110800	transcription initiation factor TFIIB, putative	-0.020648	-0.010074	0.005309		0.015567	-0.016543	-0.008155	0.01463	0.057672
Pf3D7_01_v3	420043	421103	PF3D7_0110900	adenylate kinase-like protein 1	0.003003	-0.238193	-0.279755		-0.047912	-0.138881	0.016423	0.001991	-0.073024
Pf3D7_01_v3	421526	427825	PF3D7_0111000	kinesin-8, putative	-0.015778	-0.013196	0.029152		-0.058819	-0.038719	-0.077722	-0.056447	0.004918
Pf3D7_01_v3	431289	435292	PF3D7_0111300	P-loop containing nucleoside triphosphate hydrolase, putative	-0.010808	-0.008042	0.001703		-0.045799	-0.037043	-0.086607	-0.03661	-0.014532
Pf3D7_01_v3	436158	438814	PF3D7_0111400	conserved Plasmodium protein, unknown function	-0.008431	-0.055322	-0.040504		0.015707	0.022931	-0.038699	-0.031831	0.08412
Pf3D7_01_v3	439402	441668	PF3D7_0111500	UMP-CMP kinase, putative	-0.008387	-0.077566	-0.021813		0.004631	-0.052342	-0.005289	0.043617	0.115886
Pf3D7_01_v3	445776	449099	PF3D7_0111800	eukaryotic translation initiation factor 4E, putative	-0.009724	0.077177	0.048543		-0.057943	-0.074004	-0.164207	-0.050319	-0.089026
Pf3D7_01_v3	450739	453368	PF3D7_0112000	TatD-like deoxyribonuclease	-0.017665	-0.069096	-0.061953		-0.022452	-0.122569	-0.135627	-0.051525	-0.034436
Pf3D7_01_v3	464476	470444	PF3D7_0112200	multidrug resistance-associated protein 1	-0.006475	-0.015375	0.006744		0.037441	-0.043286	-0.085823	-0.084761	0.023495
Pf3D7_01_v3	473489	475887	PF3D7_0112300	18S ribosomal RNA	0.02255	-0.132704	-0.205304		-0.053991	-0.217821	-0.299754	-0.073576	-0.263606
Pf3D7_01_v3	476403	477278	PF3D7_0112500	5.8S ribosomal RNA	-0.001067	0.042071	0.127395		-0.004751	-0.04276	-0.198687	-0.047621	0.003312
Pf3D7_01_v3	477279	481595	PF3D7_0112700	28S ribosomal RNA	0.015669	-0.064038	-0.018087		-0.134759	-0.171849	-0.227948	-0.041545	-0.184842
Pf3D7_01_v3	481596	482868	PF3D7_0112800	Plasmodium exported protein (hyp11), unknown function	-0.049258	0.038518	0.10143		-0.076511	0.030887	-0.04834	-0.01773	0.103415
Pf3D7_01_v3	486250	487436	PF3D7_0112900	Plasmodium exported protein, unknown function	-0.03441	0.090375	0.058794		-0.089059	0.051439	-0.007458	0.019286	-0.042602
Pf3D7_01_v3	487642	490377	PF3D7_0113000	glutamic acid-rich protein GARP	-0.001472	-0.122491	-0.100936		0.049907	-0.003742	0.079524	0.022525	0.022146
Pf3D7_01_v3	494994	500326	PF3D7_0113100	surface-associated interspersed protein 1.1 (SURFIN 1.1)	0.006922	-0.108427	-0.054154		-0.055535	-0.058337	0.033541	-0.066609	-0.071432
Pf3D7_01_v3	500709	503118	PF3D7_0113200	Plasmodium exported protein, unknown function	-0.018918	0.038354	0.079105		-0.045744	-0.013324	0.060672	-0.026785	-0.023591
Pf3D7_01_v3	504688	507124	PF3D7_0113300	Plasmodium exported protein (hyp1), unknown function	-0.004374	-0.125728	-0.012286		-0.09807	-0.082087	-0.008213	-0.090814	-0.027318
Pf3D7_01_v3	508002	509998	PF3D7_0113400	Plasmodium exported protein, unknown function	0.012532	-0.06085	-0.026345		-0.115426	-0.171538	-0.046083	-0.029228	-0.061422
Pf3D7_01_v3	511836	518105	PF3D7_0113600	surface-associated interspersed protein 1.2 (SURFIN 1.2), pseudogene	0.023161	-0.121832	-0.045568		-0.068996	-0.012306	0.064674	-0.033533	-0.052362
Pf3D7_01_v3	520557	522829	PF3D7_0113700	heat shock protein 40, type II	0.00055	-0.081714	-0.018852		0.002726	-0.020567	0.033035	-0.004627	0.012454
Pf3D7_01_v3	526857	536601	PF3D7_0113800	DBL containing protein, unknown function	-0.008596	0.123936	0.07483		-0.017933	0.056249	0.081674	0.031308	0.007836
Pf3D7_01_v3	536859	538275	PF3D7_0113900	CX3CL1-binding protein 1	-0.020541	-0.00395	0.09345		0.062432	0.081313	0.32908	0.129255	-0.043056
Pf3D7_01_v3	542230	547233	PF3D7_0114000	exported protein family 1	-0.012507	0.139685	0.101671		-0.155609	-0.041198	0.204333	-0.007217	-0.102622
Pf3D7_01_v3	550326	551963	PF3D7_0114200	exported protein family 3	-0.025823	0.028405	-0.053652		-0.091118	-0.044436	0.046881	-0.044364	-0.169077
Pf3D7_01_v3	552390	553927	PF3D7_0114300	exported protein family 4, pseudogene	-0.035741	0.070061	0.121884		-0.08643	0.062368	0.140652	-0.044514	-0.022813
Pf3D7_01_v3	553928	555689	PF3D7_0114400	erythrocyte membrane protein 1 (PfEMP1), exon 2, pseudogene	-0.00415	0.034477	-0.007649		0.03645	0.076096	0.154313	0.061617	0.0874
Pf3D7_01_v3	560224	561784	PF3D7_0114600	stevor, pseudogene	0.002291	0.135302	0.089178		-0.03832	-0.000154	0.194473	0.042716	-0.015109
Pf3D7_01_v3	563453	565092	PF3D7_0114700	rifin	0.01725	0.04776	0.075002		0.00927	0.004683	0.040582	0.028059	-0.057546
Pf3D7_01_v3	569235	570522	PF3D7_0114800	Plasmodium exported protein (hyp7), unknown function	-0.018013	0.206388	0.1237		0.017901	-0.090766	0.093261	0.023065	-0.17047
Pf3D7_01_v3	571885	573103	PF3D7_0114900	Plasmodium exported protein, unknown function, pseudogene	0.012285	0.001533	-0.15041		0.03621	-0.108219	0.227524	0.165498	-0.227946
Pf3D7_02_v3	109314	110830	PF3D7_0202100	liver stage associated protein 2	0.00312	0.04651	-0.061099		0.010483	-0.077663	0.300632	0.052289	-0.029304
Pf3D7_02_v3	112297	113932	PF3D7_0202200	EMP1-trafficking protein	-0.027683	0.155458	0.131003		0.010871	-0.109747	0.325358	-0.04148	-0.053861
Pf3D7_02_v3	116975	118485	PF3D7_0202300	Plasmodium exported protein (hyp11), unknown function	-0.009921	0.006189	-0.157543		0.036837	0.020989	0.055868	-0.016921	-0.082051
Pf3D7_02_v3	120274	124352	PF3D7_0202400	translation-enhancing factor	0.016638	0.052531	-0.003388		-0.027008	-0.005109	0.24522	0.016818	0.016433
Pf3D7_02_v3	127744	128564	PF3D7_0202500	early transcribed membrane protein 2	0.010022	0.021378	-0.168669		0.004219	0.023426	0.233673	0.091315	0.106589
Pf3D7_02_v3	129092	133813	PF3D7_0202600	nucleic acid binding protein, putative	-0.018482	0.011907	0.070992		0.10631	0.132611	0.184013	-0.024587	0.065466
Pf3D7_02_v3	135273	137348	PF3D7_0202700	octaprenyl pyrophosphate synthase	-0.017105	0.120348	0.001316		0.045192	0.164081	0.225238	0.12994	0.127952
Pf3D7_02_v3	137349	138639	PF3D7_0202800	conserved Plasmodium protein, unknown function	-0.083076	0.10602	0.223749		-0.016316	0.096453	0.138902	0.006601	-0.004873
Pf3D7_02_v3	138677	141408	PF3D7_0202900	palmitoyltransferase DHHC12, putative	-0.040481	-0.014534	-0.012411		-0.045323	0.06312	0.101628	0.015119	0.002873
Pf3D7_02_v3	141409	147814	PF3D7_0203000	repetitive organellar protein, putative	-0.010581	0.039091	0.118013		-0.076581	-0.04747	0.099751	-0.074453	-0.076889
Pf3D7_02_v3	149274	157231	PF3D7_0203100	protein kinase, putative	-0.019614	0.013121	0.02891		-0.006389	0.045499	0.169615	-0.01888	-0.027488
Pf3D7_02_v3	157887	159910	PF3D7_0203200	conserved Plasmodium protein, unknown function	-0.013421	-0.08869	-0.075875		-0.044137	-0.01537	0.124637	-0.012871	-0.062211
Pf3D7_02_v3	160264	161492	PF3D7_0203300	ERCC1 nucleotide excision repair protein, putative	0.01253	-0.096548	0.008813		0.070683	-0.044228	0.080165	-0.121814	-0.054469
Pf3D7_02_v3	161815	163150	PF3D7_0203400	conserved Plasmodium protein, unknown function	0.014648	0.066324	0.061215		0.03387	0.060206	-0.042502	0.128591	-0.02323
Pf3D7_02_v3	165894	168301	PF3D7_0203600	conserved Plasmodium protein, unknown function	0.009743	-0.032155	-0.005088		-0.079631	-0.083713	0.088449	0.001552	-0.108662
Pf3D7_02_v3	168432	170386	PF3D7_0203700	protein MAK16, putative	-0.02096	-0.047994	0.000577		-0.046215	-0.062763	0.102359	-0.042856	-0.020698
Pf3D7_02_v3	171313	175162	PF3D7_0203800	conserved Plasmodium protein, unknown function	0.011663	0.061187	0.015573		-0.031799	-0.006755	0.10658	0.053575	-0.0207
Pf3D7_02_v3	176317	178550	PF3D7_0203900	5'-3' exonuclease, N-terminal resolvase-like domain, putative	0.006448	-0.006933	0.008163		0.085112	0.016425	0.062667	0.055135	0.016202
Pf3D7_02_v3	178705	181776	PF3D7_0204000	condensin-2 complex subunit H2, putative	0.007979	0.074723	0.059121		-0.09582	-0.086961	0.003252	-0.065781	-0.106573
Pf3D7_02_v3	181978	189365	PF3D7_0204100	Sel1 repeat-containing protein, putative	0.00055	0.020471	0.041908		-0.054921	-0.076995	0.036911	-0.046318	-0.063198
Pf3D7_02_v3	192568	194449	PF3D7_0204200	conserved Plasmodium protein, unknown function	0.018141	-0.074101	-0.052829		-0.057754	-0.118387	-0.133331	-0.143782	-0.080274
Pf3D7_02_v3	194576	197067	PF3D7_0204300	conserved Plasmodium protein, unknown function	0.014355	-0.091555	-0.065853		-0.075306	-0.078574	-0.075985	-0.127973	-0.098916
Pf3D7_02_v3	197068	198198	PF3D7_0204400	dynein light chain, putative	-0.001758	0.000548	0.005654		0.014624	0.035883	0.001172	-0.048399	-0.091348
Pf3D7_02_v3	198199	199820	PF3D7_0204500	aspartate transaminase	0.027586	-0.026514	-0.05201		-0.051731	-0.215393	-0.014145	-0.134005	-0.192823
Pf3D7_02_v3	200232	204298	PF3D7_0204600	5'-3' exonuclease, putative	0.000377	0.05957	0.131205		-0.051217	-0.042795	-0.018749	-0.075504	-0.073561
Pf3D7_02_v3	205639	207653	PF3D7_0204700	hexose transporter	-0.011752	-0.023314	-0.026501		0.070456	-0.011078	-0.041027	0.015502	0.007664
Pf3D7_02_v3	209333	211083	PF3D7_0204800	3'-5' exonuclease, putative	-0.017796	-0.124766	-0.103771		-0.042336	0.007175	-0.0829	-0.020098	0.018652
Pf3D7_02_v3	211098	212804	PF3D7_0204900	2-methoxy-6-polyprenyl-1,4-benzoquinol methylase, mitochondrial, putative	-0.008166	0.062697	0.139455		-0.101144	0.067268	0.062932	-0.022682	0.000735
Pf3D7_02_v3	212805	214673	PF3D7_0205000	conserved Plasmodium protein, unknown function	-0.007483	-0.038745	0.005945		-0.043173	0.05835	0.078821	0.012435	0.023004
Pf3D7_02_v3	214674	217598	PF3D7_0205100	conserved Plasmodium protein, unknown function	-0.009831	0.005421	-0.064671		0.04007	0.055334	0.109571	0.023348	0.057428
Pf3D7_02_v3	217632	219157	PF3D7_0205200	MORN repeat protein, putative	-0.076124	0.092494	0.062948		0.1447	0.142923	0.146837	0.056631	0.086143
Pf3D7_02_v3	219440	222506	PF3D7_0205300	conserved Plasmodium protein, unknown function	-0.018988	-0.056873	-0.10362		-0.066621	-0.053851	0.064662	-0.028949	-0.038255
Pf3D7_02_v3	223228	225101	PF3D7_0205400	PCI domain-containing protein, putative	0.015771	-0.001557	-0.047378		-0.139878	-0.231458	-0.08962	-0.108821	-0.19088
Pf3D7_02_v3	225312	226495	PF3D7_0205500	DNA-directed RNA polymerase II 16 kDa subunit, putative	0.007924	0.221322	0.085395		0.003769	0.040093	0.108594	0.02627	0.03249
Pf3D7_02_v3	227775	230182	PF3D7_0205600	conserved Plasmodium protein, unknown function	0.0226	-0.052625	-0.034802		-0.075982	-0.139113	0.00609	-0.079306	-0.09198
Pf3D7_02_v3	230891	232629	PF3D7_0205700	RNA-binding protein, putative	-0.035247	0.056719	0.158435		0.049537	-0.054012	0.085103	0.121755	0.054675
Pf3D7_02_v3	232630	233726	PF3D7_0205800	PH domain-containing protein, putative	-0.049174	0.130368	0.070234		-0.121023	0.011405	0.327419	0.190559	-0.015729
Pf3D7_02_v3	234987	239031	PF3D7_0205900	26S proteasome regulatory subunit RPN1, putative	-0.000422	0.045435	0.010756		0.012929	-0.038496	-0.048047	-0.023198	-0.023583
Pf3D7_02_v3	239032	244046	PF3D7_0206000	DNA repair protein RAD2, putative	-0.002301	-0.005626	0.042183		-0.102297	-0.093078	-0.004113	-0.0599	-0.073428
Pf3D7_02_v3	245108	246949	PF3D7_0206100	cysteine desulfuration protein SufE	-0.011976	0.079226	0.04623		-0.008394	-0.087012	0.047241	-0.042274	-0.05069
Pf3D7_02_v3	248780	250977	PF3D7_0206200	pantothenate transporter	0.015011	-0.010791	-0.014546		-0.040196	0.001123	-0.008545	-0.016873	0.067349
Pf3D7_02_v3	252144	262693	PF3D7_0206300	pentafunctional AROM polypeptide, putative, pseudogene	-0.004918	-0.011767	-0.057011		-0.004873	-0.049425	-0.076428	-0.02255	0.021646
Pf3D7_02_v3	262787	267597	PF3D7_0206500	conserved Plasmodium protein, unknown function	-0.000268	0.031594	0.063634		-0.119794	-0.104634	-0.047292	-0.073845	-0.050549
Pf3D7_02_v3	271344	273259	PF3D7_0206700	adenylosuccinate lyase	0.017765	-0.052558	-0.121113		-0.029428	-0.051876	0.025806	-0.029095	0.02247
Pf3D7_02_v3	273439	274757	PF3D7_0206800	merozoite surface protein 2	0.026034	0.03523	0.015497		0.09968	0.006605	-0.257632	0.084057	0.044293
Pf3D7_02_v3	275290	276827	PF3D7_0206900	merozoite surface protein 5	-0.026621	0.130921	0.05088		-0.025026	0.037561	-0.0644	0.010948	0.098065
Pf3D7_02_v3	277244	278706	PF3D7_0207000	merozoite surface protein 4	-0.002282	0.105509	0.00068		-0.125057	-0.138688	-0.078724	-0.030656	-0.10977
Pf3D7_02_v3	281657	287595	PF3D7_0207100	conserved Plasmodium protein, unknown function	-0.000937	-0.014726	0.005792		-0.043662	-0.005306	-0.048722	0.007537	0.038611
Pf3D7_02_v3	289918	292953	PF3D7_0207300	serine repeat antigen 8	-0.002583	0.061598	0.113184		-0.016329	-0.039293	-0.02915	-0.007019	0.010894
Pf3D7_02_v3	294023	297866	PF3D7_0207400	serine repeat antigen 7	-0.012909	0.049757	0.059579		-0.07426	-0.042887	-0.085746	-0.016168	-0.053321
Pf3D7_02_v3	298647	302814	PF3D7_0207500	serine repeat antigen 6	-0.007377	0.070071	0.047145		-0.023153	-0.0065	0.039575	0.01318	0.045496
Pf3D7_02_v3	303343	307277	PF3D7_0207600	serine repeat antigen 5	-0.016701	-0.031532	0.031453		-0.048191	0.003887	0.024934	0.006568	-0.042462
Pf3D7_02_v3	308597	312405	PF3D7_0207700	serine repeat antigen 4	-0.027301	-0.009022	0.03769		-0.055824	-0.032103	-0.011583	0.029649	-0.036426
Pf3D7_02_v3	313199	316991	PF3D7_0207800	serine repeat antigen 3	-0.014777	-0.000786	0.011634		0.001248	-0.02984	-0.10254	-0.040776	-0.059361
Pf3D7_02_v3	317346	321560	PF3D7_0207900	serine repeat antigen 2	-0.012649	0.015716	0.002623		-0.012649	-0.043245	-0.076821	-0.033031	-0.021355
Pf3D7_02_v3	322088	325973	PF3D7_0208000	serine repeat antigen 1	-0.005092	0.061951	0.051903		-0.03219	-0.028112	0.028459	-0.033792	-0.014939
Pf3D7_02_v3	327682	335441	PF3D7_0208100	conserved Plasmodium protein, unknown function	0.00219	0.00668	0.050805		-0.01451	-0.087377	0.019155	0.022446	-0.030064
Pf3D7_02_v3	335442	336831	PF3D7_0208200	KRR1 small subunit processome component, putative	0.017595	0.139297	-0.007013		-0.035556	-0.090911	0.018387	-0.060153	-0.019288
Pf3D7_02_v3	337308	343137	PF3D7_0208300	conserved Plasmodium protein, unknown function	0.019037	-0.024314	-0.051528		-0.103048	-0.111072	-0.045551	0.056806	-0.08697
Pf3D7_02_v3	343138	349590	PF3D7_0208400	conserved Plasmodium protein, unknown function	0.023829	0.009831	-0.007411		-0.071472	-0.103768	-0.100789	-0.105971	-0.032873
Pf3D7_02_v3	352586	353878	PF3D7_0208500	acyl carrier protein	-0.019553	-0.169815	-0.001797		-0.07292	-0.034657	-0.163394	-0.024332	-0.017292
Pf3D7_02_v3	354371	356309	PF3D7_0208600	ribosome-recycling factor	-0.011859	-0.067172	-0.024129		-0.019665	-0.111526	-0.0651	-0.090677	-0.094413
Pf3D7_02_v3	356310	358264	PF3D7_0208700	conserved Plasmodium protein, unknown function, unspecified product	0.037953	-0.185039	-0.129841		-0.040175	-0.053638	-0.088757	-0.022587	-0.034993
Pf3D7_02_v3	358892	360099	PF3D7_0208800	conserved Plasmodium protein, unknown function	-0.039967	-0.005598	0.078778		-0.095741	-0.054633	-0.002197	-0.007444	-0.104306
Pf3D7_02_v3	360578	368604	PF3D7_0208900	6-cysteine protein P230p	-0.021571	-0.003204	-0.004141		0.019952	0.046139	-0.03999	-0.0007	0.035308
Pf3D7_02_v3	370188	380095	PF3D7_0209000	6-cysteine protein P230	-0.012009	-0.000752	0.024936		-0.00878	0.016677	-0.022916	0.030311	0.005456
Pf3D7_02_v3	380880	383695	PF3D7_0209100	patatin-like phospholipase, putative	0.017736	-0.010759	-0.00797		-0.038953	-0.099095	-0.081596	0.019292	-0.038814
Pf3D7_02_v3	384615	386830	PF3D7_0209200	exosome complex component MTR3, putative	-0.024483	-0.014579	0.031992		0.093637	0.085172	-0.03609	0.129748	0.119895
Pf3D7_02_v3	387023	388287	PF3D7_0209300	2C-methyl-D-erythritol 2,4-cyclodiphosphate synthase	0.033011	-0.176739	-0.117219		-0.076929	-0.084341	-0.014342	0.039571	0.009637
Pf3D7_02_v3	388288	390861	PF3D7_0209400	conserved protein, unknown function	0.008746	-0.062791	-0.045804		-0.026906	-0.083385	6e-05	0.001538	-0.025276
Pf3D7_02_v3	391025	393039	PF3D7_0209500	conserved Plasmodium protein, unknown function	-0.000882	-0.094182	0.041636		0.073921	0.050048	-0.103367	0.053295	0.104447
Pf3D7_02_v3	393987	398995	PF3D7_0209600	transporter, putative	0.006064	-0.039556	0.00529		0.041404	0.059721	-0.026037	0.062534	0.099969
Pf3D7_02_v3	399903	402109	PF3D7_0209700	RING zinc finger protein, putative	0.007371	-0.078065	-0.023488		-0.024129	0.000361	-0.041289	0.016305	-0.00172
Pf3D7_02_v3	404031	406605	PF3D7_0209800	ATP-dependent RNA helicase UAP56	-0.002057	-0.08784	-0.010207		-0.057564	0.011618	-0.101691	0.048949	-0.005489
Pf3D7_02_v3	409733	410478	PF3D7_0210000	secretory complex protein 61 gamma subunit	-0.003635	0.105158	0.194542		0.191421	0.255747	0.011814	0.128252	0.213267
Pf3D7_02_v3	413069	421387	PF3D7_0210200	conserved Plasmodium protein, unknown function	-0.000178	0.013118	0.012032		-0.016878	0.061948	-0.050242	0.056971	0.036156
Pf3D7_02_v3	422813	424904	PF3D7_0210300	monocarboxylate transporter, putative	-0.000358	-0.04028	0.674164		-0.034414	-0.007302	-0.057201	0.000687	-0.027945
Pf3D7_02_v3	425439	426747	PF3D7_0210400	50S ribosomal protein L33, putative	0.008836	0.006496	0.603726		0.065687	0.121161	0.097431	0.139785	0.077671
Pf3D7_02_v3	427240	431780	PF3D7_0210500	conserved Plasmodium protein, unknown function	0.039891	0.042619	0.672252		-0.03808	-0.023191	-0.007446	0.019064	0.026714
Pf3D7_02_v3	431791	434336	PF3D7_0210600	conserved protein, unknown function	-0.015227	-0.062082	0.669025		-0.002965	0.054909	0.086968	0.073445	0.076852
Pf3D7_02_v3	435800	437244	PF3D7_0210700	syntaxin, Qa-SNARE family	0.001933	0.626159	0.555119		0.029785	-0.035706	0.388823	0.034186	0.053841
Pf3D7_02_v3	437505	439252	PF3D7_0210800	conserved Plasmodium protein, unknown function	-0.047863	0.707952	0.756964		-0.100373	-0.085268	0.423853	-0.014227	0.018535
Pf3D7_02_v3	441830	443184	PF3D7_0210900	conserved Plasmodium protein, unknown function	0.012903	0.62194	0.570427		0.007721	0.006323	0.391508	0.035738	0.034425
Pf3D7_02_v3	443574	444858	PF3D7_0211000	unspecified product	-0.008043	0.520749	0.58571		0.085148	-0.112723	0.433908	0.111684	-0.064605
Pf3D7_02_v3	451501	455347	PF3D7_0211100	conserved Plasmodium protein, unknown function	0.031609	0.680566	0.663074		-0.033074	-0.079937	0.454531	0.028044	-0.023894
Pf3D7_02_v3	455348	456536	PF3D7_0211200	ras-related protein Rab-5A	-0.028757	0.675175	0.763063		-0.129935	-0.05927	0.393009	-0.110532	0.038056
Pf3D7_02_v3	456880	458828	PF3D7_0211300	ubiquinol-cytochrome-c reductase complex assembly factor 1, putative	0.052713	0.645475	0.61567		-0.04394	-0.038388	0.480085	0.040875	-0.046295
Pf3D7_02_v3	458829	461768	PF3D7_0211400	beta-ketoacyl-ACP synthase III	0.024905	0.615363	0.610039		-0.078342	-0.190783	0.404784	-0.049355	-0.137109
Pf3D7_02_v3	462913	467150	PF3D7_0211500	GAF domain-related protein, putative	0.02131	0.670092	0.661723		0.006114	-0.036348	0.471619	0.021767	-0.054575
Pf3D7_02_v3	467597	468726	PF3D7_0211600	UDP-N-acetylglucosamine transferase subunit ALG14, putative	0.009163	0.531447	0.502842		-0.102253	-0.113711	0.363908	-0.104761	-0.102477
Pf3D7_02_v3	469540	473741	PF3D7_0211700	tyrosine kinase-like protein, putative	-0.01574	0.738504	0.769329		-0.038676	-0.032182	0.455147	-0.013031	-0.03369
Pf3D7_02_v3	474992	477253	PF3D7_0211800	asparagine--tRNA ligase	-0.008047	0.73021	0.690469		-0.098346	-0.047775	0.464207	-0.029385	-0.051733
Pf3D7_02_v3	477254	479341	PF3D7_0211900	pseudouridine synthase, putative	0.021024	0.711193	0.553502		-0.075237	0.074912	0.534677	0.016764	0.015742
Pf3D7_02_v3	479850	481682	PF3D7_0212000	GDP-fructose:GMP antiporter, putative	-0.001471	0.229549	-0.098094		0.039771	0.079148	0.591118	0.070225	0.043305
Pf3D7_02_v3	483186	489220	PF3D7_0212100	conserved Plasmodium protein, unknown function	-0.017213	0.0172	0.093721		-0.089033	-0.053311	0.430163	-0.029619	-0.023194
Pf3D7_02_v3	489654	491068	PF3D7_0212200	ribosomal protein L12, mitochondrial, putative	-0.018418	-0.098837	-0.078778		-0.053535	0.042784	0.475402	0.091192	-0.022787
Pf3D7_02_v3	492366	494556	PF3D7_0212300	peptide chain release factor subunit 1, putative	0.015888	-0.026818	-0.065465		-0.048257	-0.075827	0.537869	-0.024034	0.026195
Pf3D7_02_v3	494916	508104	PF3D7_0212400	conserved Plasmodium membrane protein, unknown function	0.008545	0.022541	0.024517		-0.0594	-0.037783	0.504753	0.024044	0.023387
Pf3D7_02_v3	509275	521996	PF3D7_0212500	conserved Plasmodium protein, unknown function	-0.011407	-0.016904	0.035282		-0.075036	0.027886	-0.036131	0.034381	0.011446
Pf3D7_02_v3	522681	524249	PF3D7_0212600	secreted protein with altered thrombospondin repeat domain	0.015981	-0.038759	0.022116		0.001987	0.105335	-0.087196	0.065654	0.074187
Pf3D7_02_v3	524450	526293	PF3D7_0212700	SRR1-like protein	0.032294	-0.206318	-0.189349		-0.106517	0.001645	-0.17025	-0.03449	-0.064892
Pf3D7_02_v3	527999	532173	PF3D7_0212800	multidrug efflux pump, putative	0.008587	-0.028268	-0.007533		-0.046601	-0.005551	-0.125663	-0.000932	-0.017896
Pf3D7_02_v3	533003	534600	PF3D7_0212900	arginyl-tRNA--protein transferase	-0.015167	-0.026132	0.004432		0.02978	0.069739	-0.036918	0.034333	0.066772
Pf3D7_02_v3	535396	536396	PF3D7_0213000	conserved protein, unknown function	0.005279	-0.105585	-0.129166		0.075162	0.065294	0.210031	0.051118	0.089501
Pf3D7_02_v3	537539	539670	PF3D7_0213100	protein SIS1	-0.006684	-0.002693	0.030595		0.005209	-0.038553	-0.010513	0.007538	0.016225
Pf3D7_02_v3	541680	546145	PF3D7_0213400	protein kinase 7	0.022804	0.062597	0.061295		-0.027833	-0.013354	-0.04867	-0.00987	-0.033917
Pf3D7_02_v3	546232	555544	PF3D7_0213600	conserved Plasmodium protein, unknown function	0.021581	0.026067	0.01605		-0.007905	0.008304	-0.074483	0.069855	0.002845
Pf3D7_02_v3	556798	557946	PF3D7_0213700	conserved protein, unknown function	-0.03239	0.021604	-0.085421		0.024476	0.055861	-0.08968	0.104367	0.035667
Pf3D7_02_v3	558335	560844	PF3D7_0213800	conserved protein, unknown function	-0.043314	-0.093648	-0.044964		-0.072761	-0.03287	-0.157992	0.039732	-0.022555
Pf3D7_02_v3	560872	564872	PF3D7_0213900	RTR1 domain-containing protein, putative	0.002953	-0.020711	0.054946		-0.101838	-0.019096	-0.105005	-0.006132	-0.092395
Pf3D7_02_v3	565871	568144	PF3D7_0214000	T-complex protein 1 subunit theta	0.001022	0.014667	-0.000166		-0.051486	0.093418	-0.028167	0.086077	0.036627
Pf3D7_02_v3	568279	573565	PF3D7_0214100	protein transport protein SEC31	0.008915	-0.01556	0.065766		0.003244	0.016687	-0.102096	0.029184	0.040311
Pf3D7_02_v3	574905	576304	PF3D7_0214200	ribosomal protein L13, mitochondrial	-0.008934	-0.029687	-0.052501		0.005867	-0.002782	-0.073998	0.041025	0.030764
Pf3D7_02_v3	578412	586414	PF3D7_0214300	conserved Plasmodium protein, unknown function	0.002977	0.044358	0.059443		-0.017071	0.026766	-0.055857	0.015194	0.065068
Pf3D7_02_v3	586515	589301	PF3D7_0214400	conserved protein, unknown function	-0.015715	0.007756	0.029876		0.055482	0.061846	0.080144	0.041165	0.069941
Pf3D7_02_v3	590251	591671	PF3D7_0214500	conserved Plasmodium protein, unknown function	0.02276	-0.066639	-0.051061		-0.067951	-0.001129	0.012502	0.112554	-0.066328
Pf3D7_02_v3	593946	599584	PF3D7_0214600	serine/threonine protein kinase, putative	0.009854	0.010473	0.040106		-0.085868	-0.05366	-0.067462	0.00506	-0.026899
Pf3D7_02_v3	599585	601962	PF3D7_0214700	conserved Plasmodium protein, unknown function	-0.015682	0.010162	0.039466		-0.057526	0.030772	0.030653	0.082115	0.068686
Pf3D7_02_v3	604795	609575	PF3D7_0214800	conserved Plasmodium membrane protein, unknown function	0.004076	-0.003096	-0.013018		-0.043934	-0.039487	-0.03873	0.005629	-0.021405
Pf3D7_02_v3	610375	615622	PF3D7_0214900	rhoptry neck protein 6	0.00198	-0.024924	0.054293		0.088055	0.060766	0.05754	0.066388	0.143607
Pf3D7_02_v3	616522	619679	PF3D7_0215000	acyl-CoA synthetase	0.002813	-0.073909	-0.095669		-0.033709	0.005855	-0.035246	0.005422	-0.000437
Pf3D7_02_v3	622274	624556	PF3D7_0215100	RING zinc finger protein, putative	0.019583	0.101776	0.065981		-0.061829	0.052907	0.032633	0.062225	0.089174
Pf3D7_02_v3	626726	627960	PF3D7_0215200	conserved Plasmodium protein, unknown function	0.016065	0.01611	0.151064		0.050898	0.167292	-0.127389	0.045532	0.142821
Pf3D7_02_v3	628392	631558	PF3D7_0215300	acyl-CoA synthetase	0.002005	-0.079237	-0.006641		0.081106	0.075384	0.04735	0.062835	0.04242
Pf3D7_02_v3	634339	637757	PF3D7_0215400	conserved Plasmodium protein, unknown function	0.031449	-0.110179	-0.095174		0.024312	0.068871	-0.047507	0.025484	0.018082
Pf3D7_02_v3	640150	642900	PF3D7_0215500	conserved Plasmodium protein, unknown function	0.020998	-0.009511	-0.118664		-0.000324	-0.026283	-0.066178	-0.000307	0.041452
Pf3D7_02_v3	642901	644567	PF3D7_0215600	conserved Plasmodium protein, unknown function	-0.028348	0.167033	0.082963		0.065655	0.040044	0.012596	0.016485	0.009993
Pf3D7_02_v3	645679	650335	PF3D7_0215700	DNA-directed RNA polymerase II subunit RPB2, putative	-0.019612	0.031453	0.038405		0.000652	0.066665	-0.033294	0.023713	0.042046
Pf3D7_02_v3	650413	653612	PF3D7_0215800	origin recognition complex subunit 5	0.006193	-0.047236	-0.041553		0.030386	0.022011	-0.037131	0.027961	0.007069
Pf3D7_02_v3	654668	657090	PF3D7_0215900	palmitoyltransferase DHHC11, putative	-0.001976	-0.062269	-0.048619		0.008802	0.040073	0.069087	0.129194	0.107733
Pf3D7_02_v3	658386	664806	PF3D7_0216000	DEAD/DEAH box helicase, putative	0.003014	0.079724	0.042744		0.004654	0.012379	-0.062236	0.018155	0.014583
Pf3D7_02_v3	664807	668758	PF3D7_0216100	conserved Plasmodium protein, unknown function	-0.00384	0.079672	0.070197		-0.065195	-0.006958	0.00393	0.084296	-0.007381
Pf3D7_02_v3	668759	670091	PF3D7_0216200	conserved Plasmodium protein, unknown function	-0.029231	-0.030444	-0.083757		-0.023619	0.058478	-0.039032	0.080564	0.077757
Pf3D7_02_v3	670163	674808	PF3D7_0216300	conserved Plasmodium protein, unknown function	0.006016	0.050418	0.042061		0.003343	0.022961	0.036803	0.084422	0.033355
Pf3D7_02_v3	675181	677849	PF3D7_0216400	vacuolar protein sorting-associated protein 45	-0.014747	0.005028	-0.000509		0.017826	0.092085	-0.02132	0.028812	0.048455
Pf3D7_02_v3	678237	683953	PF3D7_0216500	conserved Plasmodium protein, unknown function	0.014099	-0.029351	0.006335		-0.007139	0.014566	-0.064585	0.019422	0.031406
Pf3D7_02_v3	686235	688795	PF3D7_0216600	MtN3-like protein	0.005585	0.077882	0.084352		-0.045397	-0.046868	-0.074949	-0.072994	-0.038604
Pf3D7_02_v3	690061	695988	PF3D7_0216700	autophagy-related protein 11, putative	-0.012293	0.064266	0.087006		0.025507	0.100533	-0.081378	0.011278	0.096986
Pf3D7_02_v3	695989	699811	PF3D7_0216800	TMEM121 domain-containing protein, putative	0.00112	0.02718	0.035548		-0.010768	-0.027685	-0.023747	0.039531	0.03424
Pf3D7_02_v3	700995	702992	PF3D7_0216900	conserved Plasmodium protein, unknown function	-0.040792	0.050836	0.025191		-0.041577	-0.101825	-0.144211	-0.076062	-0.081514
Pf3D7_02_v3	702993	706837	PF3D7_0217000	conserved Plasmodium membrane protein, unknown function	0.007131	0.102251	0.091584		0.067179	0.0798	-0.026861	0.00735	0.065773
Pf3D7_02_v3	707488	709596	PF3D7_0217100	ATP synthase subunit alpha, mitochondrial	-0.011493	-0.118971	-0.093659		0.00971	0.025471	-0.021697	0.012706	0.072628
Pf3D7_02_v3	709597	715502	PF3D7_0217200	conserved Plasmodium protein, unknown function	-0.009513	-0.050944	0.002304		-0.059946	-0.041183	-0.085963	-0.036944	-0.03995
Pf3D7_02_v3	715548	716799	PF3D7_0217300	AP-2 complex subunit sigma, putative	0.020642	-0.139817	-0.122166		-0.237417	-0.105158	-0.220361	0.048078	0.003978
Pf3D7_02_v3	717442	718531	PF3D7_0217400	conserved protein, unknown function	-0.008053	-0.196833	-0.027523		0.05104	0.128521	-0.124776	0.102463	0.154629
Pf3D7_02_v3	720187	722911	PF3D7_0217500	calcium-dependent protein kinase 1	-0.017965	-0.152184	-0.027939		-0.238277	-0.425877	-0.121118	-0.111178	-0.396948
Pf3D7_02_v3	723497	730182	PF3D7_0217600	conserved Plasmodium protein, unknown function	0.005845	0.024086	0.054306		0.037263	-0.061	-0.002513	-0.024777	0.001583
Pf3D7_02_v3	730870	732562	PF3D7_0217700	E2F-associated phosphoprotein, putative	-0.01397	0.076475	0.095812		-0.003647	-0.026365	-0.055489	0.004004	-0.025251
Pf3D7_02_v3	734022	734845	PF3D7_0217800	40S ribosomal protein S26	-0.039571	-0.141652	-0.031996		0.116275	0.108404	0.264919	0.102152	0.034567
Pf3D7_02_v3	735188	737247	PF3D7_0217900	conserved Plasmodium protein, unknown function	0.003638	0.032298	0.018096		-0.006826	-0.095701	-0.033881	0.001502	-0.067504
Pf3D7_02_v3	738610	740102	PF3D7_0218000	replication factor C subunit 2, putative	-0.018627	0.0617	0.059816		-0.034603	0.025234	-0.037311	-0.018074	0.005827
Pf3D7_02_v3	740764	742709	PF3D7_0218100	conserved protein, unknown function	0.048204	-0.027851	0.089135		0.040248	-0.08416	-0.079737	0.025054	0.0436
Pf3D7_02_v3	743039	745962	PF3D7_0218200	SUZ domain-containing protein, putative	0.006661	0.018385	-0.053804		-0.070334	-0.100114	-0.165007	-0.007149	-0.112079
Pf3D7_02_v3	747316	749615	PF3D7_0218300	rRNA methyltransferase, putative	-0.031577	-0.082346	-0.08585		0.000807	-0.081176	-0.168311	0.090283	-0.099758
Pf3D7_02_v3	749799	751987	PF3D7_0218400	ATP-dependent RNA helicase DDX47, putative	-0.007062	-0.014852	0.009911		-0.075922	-0.096822	-0.094625	-0.030006	-0.102701
Pf3D7_02_v3	752716	753689	PF3D7_0218500	small nuclear ribonucleoprotein Sm D2, putative	-0.069861	-0.077007	0.049007		0.059582	0.029798	0.109284	0.064629	0.130779
Pf3D7_02_v3	755168	762810	PF3D7_0218600	patatin-like phospholipase, putative	-0.006369	-0.0149	0.027804		0.008715	-0.016026	-0.020945	-0.012824	0.004885
Pf3D7_02_v3	763241	765441	PF3D7_0218700	pre-mRNA-processing protein 45, putative	-0.022916	-0.007142	-0.095909		0.070613	-0.00872	-0.084711	-0.029142	-0.032019
Pf3D7_02_v3	766140	767265	PF3D7_0218800	ribonuclease P	-0.028568	-0.098062	-0.031479		0.083854	0.007957	0.160676	0.116925	0.013817
Pf3D7_02_v3	769511	771291	PF3D7_0219100	saccharopine dehydrogenase, putative	0.019449	-0.095893	-0.082532		0.041854	-0.01848	-0.011203	0.038805	0.137956
Pf3D7_02_v3	774565	776286	PF3D7_0219400	ribosome associated membrane protein RAMP4, putative, unspecified product	0.022182	-0.188555	-0.100559		-0.048551	-0.0189	-0.243995	0.097292	-0.09259
Pf3D7_02_v3	776578	778315	PF3D7_0219500	pseudouridine synthase, putative	0.003677	0.068369	0.035798		0.089186	0.066145	-0.051644	0.072209	0.114306
Pf3D7_02_v3	779168	782382	PF3D7_0219600	replication factor C subunit 1, putative	0.006919	-0.058484	-0.009504		0.019319	-0.089032	-0.039949	-0.052161	-0.015711
Pf3D7_02_v3	783473	785078	PF3D7_0219700	Plasmodium exported protein (PHISTc), unknown function	0.005523	-0.125511	-0.082497		0.000379	-0.131737	0.053972	-0.028036	-0.066957
Pf3D7_02_v3	786620	788190	PF3D7_0219800	Plasmodium exported protein (PHISTc), unknown function	0.004879	-0.16163	-0.067652		-0.053621	-0.126313	-0.168535	-0.026667	-0.099723
Pf3D7_02_v3	791214	792631	PF3D7_0219900	Plasmodium exported protein, unknown function	0.009351	-0.036229	-0.066086		0.08158	0.057223	-0.031586	0.05032	0.011303
Pf3D7_02_v3	796502	801836	PF3D7_0220000	liver stage antigen 3	0.018342	-0.029231	-0.015749		0.032716	0.005227	0.111167	-0.062096	-0.001113
Pf3D7_02_v3	804270	807991	PF3D7_0220100	DnaJ protein, putative	0.000177	0.032033	-0.075313		0.044336	-0.011191	-0.025173	-0.080193	0.029671
Pf3D7_02_v3	809261	810548	PF3D7_0220200	Plasmodium exported protein, unknown function	-0.026446	-0.023628	0.028189		-0.103605	-0.159157	0.192448	-0.032202	-0.201186
Pf3D7_02_v3	813577	814904	PF3D7_0220300	Plasmodium exported protein, unknown function	0.0253	0.131315	0.010612		0.041755	0.015688	0.106804	0.064211	-0.067995
Pf3D7_02_v3	820179	822791	PF3D7_0220400	DnaJ protein, putative, pseudogene	0.008126	-0.03161	-0.028213		-0.010567	-0.033048	-0.017771	0.018777	-0.061523
Pf3D7_02_v3	823575	825114	PF3D7_0220500	Plasmodium exported protein (hyp2), unknown function	0.01999	-0.07827	0.048319		-0.213382	-0.276235	-0.113472	-0.108234	-0.245578
Pf3D7_02_v3	830939	832255	PF3D7_0220600	Plasmodium exported protein (hyp9), unknown function	-0.014095	-0.015388	-0.102867		-0.021539	-0.017601	0.158901	-0.067361	-0.105799
Pf3D7_02_v3	833555	834938	PF3D7_0220700	Plasmodium exported protein (hyp9), unknown function	0.013222	-0.018311	0.041225		0.003695	-0.013157	0.038162	0.018764	0.010883
Pf3D7_02_v3	838593	844366	PF3D7_0220800	cytoadherence linked asexual protein 2	0.007986	0.00407	-0.011204		0.050683	0.089456	0.066294	-0.01375	-0.014842
Pf3D7_02_v3	845350	846625	PF3D7_0220900	Plasmodium exported protein, unknown function, pseudogene	-0.042076	0.064934	0.022948		0.089784	0.180462	0.049715	0.003246	0.073717
Pf3D7_02_v3	847842	849369	PF3D7_0221000	Plasmodium exported protein, unknown function	-0.026198	0.011057	0.023058		0.045943	0.057189	-0.013953	-0.020916	-0.000191
Pf3D7_02_v3	850802	852212	PF3D7_0221100	Plasmodium exported protein, unknown function, pseudogene	-0.016064	-0.015498	-0.115979		-0.03016	0.204008	-0.187603	0.119087	0.187463
Pf3D7_02_v3	854716	855988	PF3D7_0221200	Plasmodium exported protein (hyp15), unknown function	-0.000154	0.003122	-0.091171		0.011717	0.032379	-0.076278	0.056128	-0.042391
Pf3D7_02_v3	857317	858925	PF3D7_0221300	Plasmodium exported protein, unknown function, pseudogene	-0.028356	0.056681	-0.097295		0.083447	0.076616	0.301306	0.150831	0.011375
Pf3D7_02_v3	860216	861754	PF3D7_0221400	stevor	0.01799	0.05704	0.005723		-0.026835	0.151637	0.046724	0.096583	-0.022317
Pf3D7_03_v3	69210	72169	PF3D7_0301000	acyl-CoA synthetase	-0.000922	0.000959	0.012521		0.060303	-0.015999	0.235907	0.057743	0.007649
Pf3D7_03_v3	76244	77724	PF3D7_0301100	Plasmodium exported protein (hyp13), unknown function	-0.01415	0.060516	0.085086		0.054676	0.029391	0.140662	-0.00319	-0.051844
Pf3D7_03_v3	77945	80643	PF3D7_0301200	serine/threonine protein kinase, FIKK family	0.041073	0.035378	0.11537		0.146522	0.027492	0.290591	-0.000714	0.091905
Pf3D7_03_v3	81761	83765	PF3D7_0301300	epoxide hydrolase 1	0.024865	-0.032677	-0.032939		0.116635	0.043442	0.16725	0.044408	0.007149
Pf3D7_03_v3	85055	86381	PF3D7_0301400	Plasmodium exported protein, unknown function	0.026987	0.040016	0.022413		-0.142198	-0.05047	0.035862	-0.030457	-0.025114
Pf3D7_03_v3	88000	89481	PF3D7_0301500	Plasmodium exported protein, unknown function	0.008317	0.096589	0.041713		-0.021981	0.005946	0.183989	0.07337	-0.036902
Pf3D7_03_v3	90865	93713	PF3D7_0301600	Plasmodium exported protein (hyp1), unknown function	0.004734	0.021293	0.049189		0.082197	0.067096	0.125775	0.044067	0.056763
Pf3D7_03_v3	96318	98157	PF3D7_0301700	Plasmodium exported protein, unknown function	0.023616	0.059519	0.077435		-0.161521	-0.1652	-0.005657	-0.030407	-0.188246
Pf3D7_03_v3	104075	105531	PF3D7_0301800	Plasmodium exported protein, unknown function	0.041386	0.062046	-0.157039		0.05615	-0.056769	0.043088	0.020123	-0.024804
Pf3D7_03_v3	105663	107359	PF3D7_0301900	conserved protein, unknown function	0.00286	0.128329	0.03079		-0.115293	-0.027559	-0.056251	-0.039218	-0.005359
Pf3D7_03_v3	107711	110130	PF3D7_0302000	pre-mRNA-splicing factor PRP46, putative	0.012779	-0.001972	-0.009079		-0.077727	-0.140566	0.02035	-0.041429	-0.076638
Pf3D7_03_v3	113820	118336	PF3D7_0302100	serine/threonine protein kinase	0.017883	0.029138	-0.020006		0.014834	-0.073264	-0.029031	0.012	-0.046023
Pf3D7_03_v3	119208	124985	PF3D7_0302200	cytoadherence linked asexual protein 3.2	0.006547	0.042553	0.042957		-0.094922	-0.12011	-0.071616	-0.073462	-0.126675
Pf3D7_03_v3	125742	130485	PF3D7_0302300	erythrocyte membrane protein 1 (PfEMP1), pseudogene	-0.009112	0.022735	0.006547		-0.00325	0.052817	0.004941	0.001629	0.064993
Pf3D7_03_v3	132082	133752	PF3D7_0302400	unspecified product	0.004209	0.03601	-0.150328		-0.097933	0.077114	-0.014113	-0.033152	0.057703
Pf3D7_03_v3	135168	140910	PF3D7_0302500	cytoadherence linked asexual protein 3.1	0.0077	0.010943	-0.004873		-0.06707	-0.164121	0.026413	-0.017673	-0.200547
Pf3D7_03_v3	141306	145903	PF3D7_0302600	ABC transporter B family member 4, putative	0.006756	0.014162	0.023104		0.009979	-0.060662	0.006238	-0.035611	0.044072
Pf3D7_03_v3	146122	147306	PF3D7_0302700	CDGSH iron-sulfur domain-containing protein, putative	0.054584	0.043003	0.062579		-0.172891	-0.102627	0.044333	-0.070979	-0.03574
Pf3D7_03_v3	147796	149555	PF3D7_0302800	RNA-binding protein, putative	-0.013606	0.067517	0.020465		-0.069917	-0.06734	0.073907	-0.048079	-0.113808
Pf3D7_03_v3	151918	156396	PF3D7_0302900	exportin-1, putative	-0.009845	0.034513	0.053311		0.013404	-0.004798	0.068396	-0.036773	0.010627
Pf3D7_03_v3	159103	161954	PF3D7_0303000	N-ethylmaleimide-sensitive fusion protein	-0.026209	0.013507	-0.005884		-0.105123	-0.075399	0.042989	-0.049261	-0.049936
Pf3D7_03_v3	162528	167353	PF3D7_0303100	CLP1 P-loop domain-containing protein, putative	-0.001463	0.008183	0.010934		0.063236	-0.011653	0.083176	0.061683	0.071514
Pf3D7_03_v3	169321	174550	PF3D7_0303200	HAD superfamily protein, putative	-4.3e-05	0.047747	0.062983		0.009299	-0.007647	0.07085	0.026146	0.001439
Pf3D7_03_v3	174772	176049	PF3D7_0303300	DNA-directed RNA polymerases I, II, and III subunit RPABC2, putative	-0.010852	0.040433	0.03918		-0.068292	0.073064	-0.0729	-0.012492	0.075409
Pf3D7_03_v3	178170	181377	PF3D7_0303400	palmitoyltransferase DHHC1	0.014907	0.024143	0.039022		-0.011706	-0.013605	0.020497	-0.020586	0.017085
Pf3D7_03_v3	182481	189661	PF3D7_0303500	spindle pole body protein, putative	-0.005077	-0.058211	-0.04		-0.055877	-0.077073	-0.044245	0.001641	-0.027264
Pf3D7_03_v3	189930	190969	PF3D7_0303600	plasmoredoxin	-0.032294	-0.117383	0.014188		-0.00493	0.085242	0.211232	0.129303	0.12276
Pf3D7_03_v3	190995	192841	PF3D7_0303700	lipoamide acyltransferase component of branched-chain alpha-keto acid dehydrogenase complex	0.00362	-0.068902	0.014743		-0.113205	-0.146894	0.002475	-0.00777	-0.118076
Pf3D7_03_v3	194180	196390	PF3D7_0303800	IBR domain protein, putative	-0.009648	-0.028056	0.107627		0.014436	-0.022659	-0.024651	0.03324	0.062285
Pf3D7_03_v3	196391	197688	PF3D7_0303900	phosphatidylethanolamine-binding protein, putative	0.02541	0.074853	0.021049		0.07086	0.014335	0.025415	0.042694	0.112156
Pf3D7_03_v3	198292	201834	PF3D7_0304000	inner membrane complex protein 1a, putative	-0.008603	0.033637	0.056445		0.003352	0.030253	-0.030477	0.02327	0.073945
Pf3D7_03_v3	204292	206369	PF3D7_0304100	inner membrane complex protein 1e, putative	0.006314	-0.005075	0.039515		0.00895	-0.00775	0.024935	-0.00807	0.010743
Pf3D7_03_v3	207092	209169	PF3D7_0304200	EH domain-containing protein	0.007371	-0.068399	-0.072124		0.104561	0.008863	-0.05904	0.022375	0.090976
Pf3D7_03_v3	212033	216822	PF3D7_0304300	conserved Plasmodium protein, unknown function	-3e-06	-0.047106	-0.030546		0.052391	0.045842	-0.073575	0.076725	0.125025
Pf3D7_03_v3	217691	218739	PF3D7_0304400	60S ribosomal protein L44	0.032746	0.064637	0.226853		-0.026512	-0.072244	0.087394	0.078314	0.120517
Pf3D7_03_v3	218867	220122	PF3D7_0304500	1-cys-glutaredoxin-like protein-1	-0.000741	0.094544	-0.044529		-0.047676	0.004133	-0.057474	0.017661	0.007709
Pf3D7_03_v3	221073	222766	PF3D7_0304600	circumsporozoite (CS) protein	0.015303	-0.030688	0.030226		-0.078805	-0.037247	-0.128016	0.010588	-0.113981
Pf3D7_03_v3	223910	226043	PF3D7_0304700	conserved Plasmodium protein, unknown function	-0.000958	0.021101	0.000702		0.125585	0.044662	-0.002373	0.0368	-0.030997
Pf3D7_03_v3	226807	231595	PF3D7_0304800	conserved Plasmodium membrane protein, unknown function	-0.007046	0.092059	-0.130644		0.011106	0.049917	-0.007505	0.145649	0.026595
Pf3D7_03_v3	231596	232555	PF3D7_0304900	conserved protein, unknown function	0.049548	0.116084	0.061079		0.119745	0.095259	0.046424	0.148332	0.068225
Pf3D7_03_v3	233808	235584	PF3D7_0305000	elongation factor Ts	0.012328	0.019492	-0.013603		0.021694	-0.016631	-0.00804	0.055977	-0.046208
Pf3D7_03_v3	236084	248520	PF3D7_0305100	conserved Plasmodium protein, unknown function	-0.013442	-0.012211	0.00019		-0.005797	-0.034924	-0.05965	0.015983	0.012389
Pf3D7_03_v3	250992	254911	PF3D7_0305200	conserved Plasmodium protein, unknown function	0.014113	0.005958	-0.042938		0.001881	-0.067546	-0.119399	-0.082299	-0.084444
Pf3D7_03_v3	255026	258666	PF3D7_0305300	conserved Plasmodium membrane protein, unknown function	-0.000394	0.057891	-0.005776		-0.046124	-0.018179	-0.086663	-0.025288	0.016677
Pf3D7_03_v3	260082	261285	PF3D7_0305400	conserved protein, unknown function	0.035122	0.001385	0.085507		-0.08496	0.012778	-0.205624	-0.034963	0.071406
Pf3D7_03_v3	261286	273536	PF3D7_0305500	conserved Plasmodium protein, unknown function	-0.010469	0.0079	0.016374		-0.033516	-0.012817	-0.016407	0.007187	-0.04324
Pf3D7_03_v3	275614	277967	PF3D7_0305600	DNA-(apurinic or apyrimidinic site) lyase, putative	0.0063	-0.014115	-0.087011		0.087689	-0.036687	-0.042174	-0.018598	0.019683
Pf3D7_03_v3	278706	280078	PF3D7_0305700	ubiquitin-conjugating enzyme E2, putative	0.010304	0.008419	0.027336		-0.012412	-0.076933	-0.104993	-0.035927	0.050664
Pf3D7_03_v3	281666	285419	PF3D7_0305800	P-loop containing nucleoside triphosphate hydrolase, putative	-0.008236	-0.015438	-0.055199		0.00869	-0.0049	0.035498	0.012745	-0.028449
Pf3D7_03_v3	286656	287569	PF3D7_0306000	conserved protein, unknown function	0.003224	-0.054821	-0.121146		-0.036837	-0.041235	0.051757	-0.048154	-0.077057
Pf3D7_03_v3	288387	290997	PF3D7_0306100	conserved Plasmodium protein, unknown function	-0.000649	0.02667	0.095817		0.009476	0.053426	0.081561	-0.01606	0.032593
Pf3D7_03_v3	292693	294798	PF3D7_0306200	activator of Hsp90 ATPase	0.003647	-0.011075	-0.035402		0.038073	0.116625	-0.054564	0.08394	0.040519
Pf3D7_03_v3	294857	296344	PF3D7_0306300	glutaredoxin 1	-0.030694	-0.076267	0.065453		0.067986	0.138953	-0.10523	0.190556	0.171392
Pf3D7_03_v3	298267	300728	PF3D7_0306400	FAD-dependent glycerol-3-phosphate dehydrogenase, putative	-0.01155	2.6e-05	-0.005768		0.063012	0.094117	0.030319	0.090935	0.043448
Pf3D7_03_v3	300757	302156	PF3D7_0306500	cytochrome c oxidase subunit ApiCOX35, putative	0.00454	-0.045094	-0.001873		-0.041192	0.048446	0.000546	0.052057	-0.002466
Pf3D7_03_v3	302576	303333	PF3D7_0306600	ATP synthase-associated protein, putative	-0.016612	-0.01392	0.105733		0.065819	0.136424	0.196965	0.04224	0.0931
Pf3D7_03_v3	305858	308234	PF3D7_0306800	T-complex protein 1 subunit beta	-0.003508	0.050997	0.056835		-0.123498	0.002434	-0.003417	0.059966	-0.006883
Pf3D7_03_v3	310402	312055	PF3D7_0306900	40S ribosomal protein S23, putative	-0.069739	-0.100537	-0.153313		-0.035029	0.04223	-0.193276	0.061521	-0.033394
Pf3D7_03_v3	312443	313592	PF3D7_0307100	40S ribosomal protein S12, putative	0.016511	0.058202	-0.057101		0.051612	0.039148	0.104851	0.076118	0.034405
Pf3D7_03_v3	314726	316486	PF3D7_0307200	60S ribosomal protein L7, putative	0.008369	-0.01214	0.001339		0.017261	-0.007235	0.00718	0.065042	0.043009
Pf3D7_03_v3	318554	320586	PF3D7_0307300	microtubule-associated protein RP/EB family, putative	-0.031882	0.068655	0.088649		0.04984	0.10107	0.033442	0.066526	0.048627
Pf3D7_03_v3	320800	322412	PF3D7_0307400	ATP-dependent Clp protease proteolytic subunit	-0.029678	-0.045023	-0.080828		0.029355	0.03142	-0.149393	0.051455	0.066525
Pf3D7_03_v3	322683	325086	PF3D7_0307500	spindle and kinetochore-associated protein 2, putative	-0.020388	0.079721	0.028543		-0.038554	-0.075676	-0.032331	-0.001403	0.018633
Pf3D7_03_v3	325672	328585	PF3D7_0307600	conserved Plasmodium protein, unknown function	0.00463	-0.052821	-0.103494		-0.047246	-0.005263	-0.068001	0.044925	-0.006111
Pf3D7_03_v3	328586	335519	PF3D7_0307700	conserved Plasmodium protein, unknown function	-0.001924	0.037316	0.053846		-0.018003	0.02413	-0.066235	0.050988	-0.003676
Pf3D7_03_v3	336929	339528	PF3D7_0307800	conserved Plasmodium protein, unknown function	-0.001646	0.003426	0.018569		0.125167	0.130544	0.106685	0.078032	0.13083
Pf3D7_03_v3	339778	351902	PF3D7_0307900	conserved Plasmodium protein, unknown function	-0.012222	0.013728	0.001737		0.013041	0.013187	-0.071327	-0.048007	-0.032009
Pf3D7_03_v3	353299	355295	PF3D7_0308000	DNA polymerase delta small subunit, putative	-0.040081	0.006273	-0.028228		-0.044548	-0.05127	0.014797	-0.055655	-0.062203
Pf3D7_03_v3	356069	361704	PF3D7_0308100	zinc finger protein, putative	-0.014035	-0.081098	-0.051942		-0.000604	-0.004911	-0.008486	-0.018958	-0.036909
Pf3D7_03_v3	362092	364483	PF3D7_0308200	T-complex protein 1 subunit eta	-0.004151	-0.086157	-0.161856		0.075024	0.008304	0.003469	0.004372	0.020844
Pf3D7_03_v3	365409	366922	PF3D7_0308300	conserved Plasmodium protein, unknown function	0.006719	-0.19997	-0.118813		0.095294	0.056556	-0.008862	0.135588	0.081172
Pf3D7_03_v3	369675	371039	PF3D7_0308500	activator of Hsp90 ATPase, putative	0.03499	0.097414	-0.014851		0.025794	0.025494	0.026346	0.106046	-0.002495
Pf3D7_03_v3	372382	374480	PF3D7_0308600	pre-mRNA-processing factor 19, putative	0.02149	0.059229	0.030237		-0.028054	0.023668	-0.047928	0.003357	0.019527
Pf3D7_03_v3	375556	377687	PF3D7_0308700	conserved protein, unknown function	0.031717	0.001318	-0.055394		-0.086376	-0.064591	-0.179603	-0.048774	-0.115598
Pf3D7_03_v3	377795	378767	PF3D7_0308800	conserved protein, unknown function	-0.036804	0.120963	0.009419		-0.027284	0.073583	0.091242	0.049881	0.052445
Pf3D7_03_v3	378880	383540	PF3D7_0308900	splicing factor 3B subunit 1, putative	0.004648	0.054883	0.026844		0.007386	-0.002048	-0.097086	0.006109	0.0272
Pf3D7_03_v3	384125	387049	PF3D7_0309000	dual specificity protein phosphatase	0.004437	0.03232	0.014589		-0.069961	-0.037028	-0.070799	-0.000988	0.034901
Pf3D7_03_v3	387050	388723	PF3D7_0309100	conserved Plasmodium protein, unknown function	-0.014705	-0.048263	-0.044708		0.140413	0.073959	0.116526	0.136717	0.163423
Pf3D7_03_v3	388887	394854	PF3D7_0309200	serine/threonine protein kinase, putative	0.011779	0.014622	-0.012209		-0.017416	0.045225	-0.018252	0.101973	0.051381
Pf3D7_03_v3	397399	400766	PF3D7_0309300	N2227-like protein, putative	0.002937	0.034166	0.018419		-0.078264	0.022272	-0.044261	-0.01615	-0.059817
Pf3D7_03_v3	402683	405690	PF3D7_0309500	asparagine synthetase [glutamine-hydrolyzing], putative	0.004982	-0.070732	-0.127762		-0.008463	0.09024	-0.096523	0.074022	0.014268
Pf3D7_03_v3	407730	408568	PF3D7_0309600	60S acidic ribosomal protein P2	-0.007964	0.001218	-0.095472		0.079521	0.054026	-0.040345	0.027121	0.156559
Pf3D7_03_v3	408852	411178	PF3D7_0309700	SECIS-binding protein 2, putative	-0.003836	0.050804	-0.060331		0.044242	0.094776	0.021098	0.110869	0.142607
Pf3D7_03_v3	411839	413998	PF3D7_0309800	YTH domain-containing protein, putative	-0.008015	0.122679	0.15647		0.026387	0.114941	-0.008257	0.066136	0.074231
Pf3D7_03_v3	413999	419923	PF3D7_0309900	conserved Plasmodium protein, unknown function	-0.002996	-0.086235	-0.016067		-0.069257	-0.021094	-0.089235	0.029086	0.01459
Pf3D7_03_v3	420447	421765	PF3D7_0310000	50S ribosomal protein L9, apicoplast, putative	-0.02102	0.15912	0.082205		-0.011173	0.034212	0.011965	0.025744	0.054482
Pf3D7_03_v3	422129	424930	PF3D7_0310100	calcium-dependent protein kinase 3	0.021468	-0.043754	-0.077851		-0.015848	-0.034865	-0.105712	-0.00385	-0.043207
Pf3D7_03_v3	427040	441192	PF3D7_0310200	phd finger protein, putative	-0.003237	0.059483	0.027536		-0.033631	0.000366	-0.002646	0.015526	-0.014699
Pf3D7_03_v3	442470	446707	PF3D7_0310300	phosphoglycerate mutase, putative	-0.007185	-0.002785	0.008902		-0.008624	0.084877	-0.005219	0.045106	0.103877
Pf3D7_03_v3	447250	451634	PF3D7_0310400	parasite-infected erythrocyte surface protein	-0.012408	-0.044566	-0.077439		0.016623	0.035712	-0.017717	0.028635	0.010609
Pf3D7_03_v3	452047	459356	PF3D7_0310500	ATP-dependent RNA helicase DHX57, putative	0.009602	0.016415	0.023693		-0.005181	0.00023	-0.089033	-0.007465	-0.038185
Pf3D7_03_v3	460925	462277	PF3D7_0310600	eukaryotic translation initiation factor 3 subunit K, putative, unspecified product	-0.04423	0.100017	0.177896		-0.058825	-0.068251	0.150258	0.071451	-0.047015
Pf3D7_03_v3	463076	464468	PF3D7_0310700	trafficking protein particle complex subunit 4, putative	-0.002583	-0.006669	0.101627		0.149699	0.171507	0.044806	0.061262	0.205509
Pf3D7_03_v3	464469	465241	PF3D7_0310800	conserved Plasmodium protein, unknown function	-0.005143	0.051053	-0.020881		-0.059834	0.00212	-0.26981	0.101612	-0.016154
Pf3D7_03_v3	465835	468695	PF3D7_0310900	conserved Plasmodium protein, unknown function	0.00811	0.000721	0.048093		-0.029501	-0.016	-0.01793	-0.009557	-0.087286
Pf3D7_03_v3	469037	470368	PF3D7_0311000	conserved Plasmodium protein, unknown function	0.002745	0.12935	0.129108		0.015795	0.098689	0.028925	0.082801	0.057498
Pf3D7_03_v3	470610	473411	PF3D7_0311100	pre-mRNA splicing factor, putative	-0.032991	-0.032337	0.006107		0.020644	0.051169	-0.004028	-0.01942	0.023286
Pf3D7_03_v3	474538	479336	PF3D7_0311200	valine--tRNA ligase, putative	-0.006464	-0.023564	-0.027764		0.045452	0.025484	0.001095	-0.010871	0.023931
Pf3D7_03_v3	479872	483703	PF3D7_0311300	phosphatidylinositol 3- and 4-kinase, putative	0.004864	-0.018354	0.024885		-0.026221	-0.038919	-0.010085	0.00461	-0.019433
Pf3D7_03_v3	488554	496760	PF3D7_0311400	kinase-related protein PKRP, putative	-0.009883	0.027584	0.030694		-0.037496	-0.03113	0.015839	0.015895	0.023943
Pf3D7_03_v3	499352	502525	PF3D7_0311600	dolichyl-diphosphooligosaccharide--protein glycosyltransferase subunit OST1, putative	0.008899	0.009992	-0.052339		-0.030664	-0.015108	-0.021749	0.020133	-0.098698
Pf3D7_03_v3	502526	506098	PF3D7_0311700	plasmepsin VI	0.024335	0.009178	0.022799		0.073606	0.04123	0.131472	0.08415	0.108253
Pf3D7_03_v3	506405	509068	PF3D7_0311800	ATP synthase F0 subunit d-like protein, putative	-0.009866	0.019249	0.030553		-0.046126	0.000916	-0.039162	-0.028987	0.016728
Pf3D7_03_v3	509069	511847	PF3D7_0311900	heptatricopeptide repeat-containing protein, putative	-0.002806	-0.011984	0.064383		-0.073707	0.013402	-0.150237	-0.04472	0.028251
Pf3D7_03_v3	511880	513201	PF3D7_0312000	conserved protein, unknown function	-0.023506	0.0995	0.099926		0.056194	0.107279	0.051074	0.018246	0.15218
Pf3D7_03_v3	513502	516512	PF3D7_0312100	E3 ubiquitin-protein ligase	-0.014112	0.074755	0.109021		-0.126665	0.018094	-0.010488	0.020381	-0.036636
Pf3D7_03_v3	516543	520753	PF3D7_0312200	tetratricopeptide repeat protein, putative	0.00705	-0.040415	-0.015302		-0.029927	-0.03054	-0.106134	-0.018188	-0.033296
Pf3D7_03_v3	521719	523133	PF3D7_0312300	26S proteasome regulatory subunit RPN12, putative	-0.048871	0.015515	-0.022589		-0.000953	-0.113639	-0.048621	-0.010803	-0.119353
Pf3D7_03_v3	523904	526689	PF3D7_0312400	glycogen synthase kinase 3	0.009721	-0.038276	-0.036332		0.040883	0.165878	0.037889	0.098197	0.091952
Pf3D7_03_v3	528787	530994	PF3D7_0312500	major facilitator superfamily-related transporter, putative	0.022536	-0.07883	-0.010533		-0.067928	-0.068675	-0.073667	-0.094024	-0.119669
Pf3D7_03_v3	533989	535488	PF3D7_0312800	60S ribosomal protein L26, putative	-0.004447	-0.155933	-0.102892		-0.030167	-0.079764	-0.047481	-0.05099	-0.092643
Pf3D7_03_v3	535793	537447	PF3D7_0312900	hypothetical protein	0.008697	-0.022588	-0.060558		-0.054523	-0.046394	-0.079898	-0.024474	-0.032492
Pf3D7_03_v3	537448	539054	PF3D7_0313000	conserved Plasmodium protein, unknown function	-0.015847	0.089845	0.284446		-0.128216	-0.119267	0.001964	-0.025753	-0.104902
Pf3D7_03_v3	539493	543025	PF3D7_0313100	ubiquitin-protein ligase, putative	0.025489	0.01316	0.07499		-0.041655	-0.094431	-0.024913	0.006959	-0.047894
Pf3D7_03_v3	543026	543998	PF3D7_0313200	conserved protein, unknown function	0.004963	0.024615	-0.146895		-0.166344	-0.048441	0.137726	0.088865	-0.052855
Pf3D7_03_v3	543999	545444	PF3D7_0313300	YGGT family protein, putative	0.025	-0.058796	-0.016816		0.173947	0.127492	0.09796	0.056978	0.116958
Pf3D7_03_v3	545578	548432	PF3D7_0313400	conserved Plasmodium protein, unknown function	0.002011	-0.162428	-0.082668		-0.107213	-0.118456	-0.065965	-0.134058	-0.078914
Pf3D7_03_v3	548468	551703	PF3D7_0313500	Ras-like G protein	-0.010143	-0.090479	-0.014434		-0.054482	-0.058344	-0.084063	-0.08017	-0.077851
Pf3D7_03_v3	551751	554828	PF3D7_0313600	conserved Plasmodium protein, unknown function	-0.049063	-0.035336	-0.003213		-0.055893	-0.049435	-0.23509	-0.065365	-0.00768
Pf3D7_03_v3	554829	558934	PF3D7_0313700	conserved Plasmodium protein, unknown function, unspecified product	-0.009738	-0.01683	-0.055811		0.031727	0.058111	0.062542	0.104481	0.124031
Pf3D7_03_v3	559084	562309	PF3D7_0313800	conserved Plasmodium protein, unknown function	-0.002278	0.061547	0.129243		-0.117467	-0.090308	-0.040811	-0.037837	-0.026302
Pf3D7_03_v3	562310	565906	PF3D7_0313900	conserved Plasmodium protein, unknown function	-0.000782	0.021279	-0.020668		-0.08411	-0.002335	-0.071575	0.021419	-0.036775
Pf3D7_03_v3	566997	569079	PF3D7_0314000	HSP20-like chaperone, putative	0.004762	0.071666	0.048854		-0.055438	-0.037215	-0.056983	0.044947	0.055276
Pf3D7_03_v3	569080	571301	PF3D7_0314100	vesicle transport v-SNARE protein, putative	-0.010294	0.080146	0.023446		-0.034794	0.138012	0.011309	0.169993	0.11986
Pf3D7_03_v3	572416	576915	PF3D7_0314200	conserved Plasmodium protein, unknown function	0.027401	-0.018091	-0.023371		0.022653	0.018899	-0.044837	0.045578	-0.019833
Pf3D7_03_v3	576916	578616	PF3D7_0314300	DER1-like protein	-0.002951	0.168207	0.023502		-0.055218	-0.075575	-0.144223	-0.091888	0.016262
Pf3D7_03_v3	579289	580715	PF3D7_0314400	serine/threonine protein phosphatase 6, putative	-0.012065	-0.075454	-0.0449		-0.022442	0.000725	-0.065585	0.041352	0.017609
Pf3D7_03_v3	583976	585418	PF3D7_0314500	conserved Plasmodium protein, unknown function	-0.058135	-0.113406	-0.017582		-0.093795	-0.007586	-0.061956	0.020058	-0.001472
Pf3D7_03_v3	586305	587581	PF3D7_0314600	conserved protein, unknown function	-0.040264	-0.037205	-0.126569		-0.04245	0.080995	-0.027115	0.063091	0.026922
Pf3D7_03_v3	588752	592797	PF3D7_0314700	RING finger protein RNF1	-0.00036	-0.028484	-0.009496		-0.033437	0.007929	-0.126178	-0.072833	0.037122
Pf3D7_03_v3	604345	608181	PF3D7_0314800	conserved Plasmodium protein, unknown function	-0.002609	0.00714	0.034209		-0.062053	-0.009731	-0.06824	-0.096464	0.042314
Pf3D7_03_v3	608633	610968	PF3D7_0314900	conserved Plasmodium membrane protein, unknown function	-0.032873	0.201031	0.09568		-0.074436	-0.010643	-0.000993	-0.038957	-0.042363
Pf3D7_03_v3	611084	612264	PF3D7_0315000	zinc finger protein, putative	0.014484	0.038948	0.01593		-0.011136	0.037769	-0.071719	0.106614	0.071595
Pf3D7_03_v3	612489	613672	PF3D7_0315100	eukaryotic translation initiation factor 4E	0.003091	-0.06962	-0.074332		-0.030348	0.004924	-0.063705	0.016519	-0.043647
Pf3D7_03_v3	616222	623066	PF3D7_0315200	circumsporozoite- and TRAP-related protein	-0.009762	-0.032886	-0.003238		-0.014238	0.056982	-0.141101	0.029535	0.03279
Pf3D7_03_v3	623196	630485	PF3D7_0315300	conserved Plasmodium protein, unknown function	-0.009596	0.070348	0.045813		-0.017126	0.025702	-0.032933	0.008747	0.051941
Pf3D7_03_v3	630486	631631	PF3D7_0315400	conserved Plasmodium protein, unknown function	-0.027286	-0.069947	-0.055376		-0.022986	-0.214915	-0.096261	-0.043452	-0.344397
Pf3D7_03_v3	632596	633794	PF3D7_0315500	mitochondrial ribosomal protein L29/L47 precursor, putative	-0.039725	0.065709	0.026881		-0.027379	0.018819	0.078706	-0.011783	-0.100049
Pf3D7_03_v3	635336	637712	PF3D7_0315600	zinc finger protein, putative	0.001383	-0.012665	0.064949		-0.02633	-0.051107	-0.149347	-0.008579	-0.04086
Pf3D7_03_v3	638033	641394	PF3D7_0315700	conserved Plasmodium membrane protein, unknown function	-0.015593	-0.029792	0.069361		-0.011373	0.010389	-0.050166	0.00926	0.003182
Pf3D7_03_v3	641395	642829	PF3D7_0315800	zinc finger protein, putative	0.00731	-0.046163	0.164751		-0.087995	-0.047483	-0.172451	0.033274	-0.136187
Pf3D7_03_v3	643936	645518	PF3D7_0315900	conserved Plasmodium protein, unknown function	-0.006905	-0.020697	0.040521		0.088975	0.096895	0.133923	0.037814	0.060293
Pf3D7_03_v3	645671	647094	PF3D7_0316000	microneme associated antigen	-0.012228	0.018959	-0.076014		0.046623	0.027868	0.082918	0.060562	0.024947
Pf3D7_03_v3	648385	649690	PF3D7_0316100	mitochondrial ribosomal protein L27 precursor, putative	0.012593	-0.022055	-0.136867		-0.008833	-0.04623	-0.083023	-0.072172	-0.025548
Pf3D7_03_v3	649691	657497	PF3D7_0316200	conserved Plasmodium protein, unknown function	-0.008548	-0.054174	-0.068316		-0.046695	-0.012776	-0.09588	0.002298	0.036819
Pf3D7_03_v3	658022	661884	PF3D7_0316300	inorganic pyrophosphatase, inorganic pyrophosphatase, putative	0.004602	-0.009069	-0.083152		-0.01712	0.004752	-0.04293	0.062998	0.009969
Pf3D7_03_v3	661885	665402	PF3D7_0316400	conserved protein, unknown function	-0.004249	-0.042135	-0.064006		-0.089684	-0.082453	-0.130457	-0.059787	-0.056152
Pf3D7_03_v3	666756	668641	PF3D7_0316500	kinetochore protein NUF2, putative	-0.012195	0.012448	-0.023987		0.003831	0.009596	-0.003061	-0.041488	0.052128
Pf3D7_03_v3	669052	671123	PF3D7_0316600	formate-nitrite transporter	0.018143	-0.003227	0.029478		0.012289	0.076731	0.076779	0.089197	0.064848
Pf3D7_03_v3	674208	675886	PF3D7_0316700	protein YOP1, putative	-0.014964	0.002257	-0.018847		-0.081117	-0.044791	0.039022	0.084687	0.036194
Pf3D7_03_v3	677592	678724	PF3D7_0316800	40S ribosomal protein S15A, putative	-0.012853	0.049532	0.011586		-0.054002	0.023331	-0.196495	-0.012095	-0.013302
Pf3D7_03_v3	678984	681527	PF3D7_0316900	E3 ubiquitin-protein ligase, putative	-0.000256	-0.050183	0.006754		0.054976	0.047276	-0.022904	0.088687	0.09911
Pf3D7_03_v3	682545	683935	PF3D7_0317000	proteasome subunit alpha type-3, putative	0.004337	0.068525	-0.002564		-0.048393	-0.19418	-0.10914	-0.053326	-0.194908
Pf3D7_03_v3	686032	689732	PF3D7_0317100	6-cysteine protein	0.002429	-0.087905	-0.080317		-0.025371	-0.017276	-0.062562	-0.002828	0.017709
Pf3D7_03_v3	689904	695065	PF3D7_0317200	cdc2-related protein kinase 4	0.002328	-0.000272	-0.021807		0.013057	0.046234	-0.051696	0.011538	0.064061
Pf3D7_03_v3	699294	709978	PF3D7_0317300	conserved Plasmodium protein, unknown function	0.004121	0.047582	0.042249		-0.07415	-0.068113	-0.05756	-0.020348	-0.005002
Pf3D7_03_v3	712003	714332	PF3D7_0317400	DNA replication complex GINS protein, putative	-0.007274	0.051676	-0.032151		-0.006618	0.019507	-0.079887	0.092247	-0.009952
Pf3D7_03_v3	716273	722081	PF3D7_0317500	kinesin-5	0.006023	-0.02713	0.035464		-0.007157	0.010838	-0.094267	0.019241	-0.014543
Pf3D7_03_v3	724765	726380	PF3D7_0317600	40S ribosomal protein S11, putative	-0.038545	-0.083528	-0.011903		-0.070448	-0.088257	-0.007379	0.041747	-0.107873
Pf3D7_03_v3	728009	738140	PF3D7_0317700	CPSF (cleavage and polyadenylation specific factor), subunit A, putative	0.000479	0.010371	0.028509		0.031179	0.037572	-0.075924	0.027905	0.001303
Pf3D7_03_v3	738141	739132	PF3D7_0317800	26S proteasome non-ATPase regulatory subunit 9, putative	0.007019	-0.102066	-0.113387		0.050398	0.20783	-0.08217	0.051122	0.260684
Pf3D7_03_v3	739178	741962	PF3D7_0317900	conserved protein, unknown function	-0.007559	-0.086753	-0.089074		0.006966	0.075953	-0.103597	0.052504	0.054644
Pf3D7_03_v3	741963	743049	PF3D7_0318000	conserved Plasmodium protein, unknown function	0.01922	-0.020402	-0.226905		-0.07015	-0.015047	-0.164439	0.064823	0.043333
Pf3D7_03_v3	743679	745303	PF3D7_0318100	stomatin-like protein, putative	-0.014183	0.031379	-0.166808		0.12825	0.046453	-0.142744	0.0728	0.082845
Pf3D7_03_v3	748215	756088	PF3D7_0318200	DNA-directed RNA polymerase II subunit RPB1	-0.010075	0.06385	0.09447		0.005344	0.0873	-0.031171	0.059987	0.057739
Pf3D7_03_v3	756241	760542	PF3D7_0318300	conserved Plasmodium protein, unknown function	-0.007384	0.07713	0.100713		-0.012107	-0.006022	0.018087	0.043379	-0.003541
Pf3D7_03_v3	761443	765689	PF3D7_0318400	conserved Plasmodium protein, unknown function	-0.020733	0.11948	0.05093		0.041415	0.021622	-0.052261	0.022885	0.049763
Pf3D7_03_v3	767565	782936	PF3D7_0318500	conserved Plasmodium protein, unknown function	-0.007044	-0.004852	-0.005901		-0.041668	-0.01637	-0.071296	0.010025	0.000274
Pf3D7_03_v3	782937	786415	PF3D7_0318600	cleavage and polyadenylation specificity factor, putative	-0.000846	-0.009358	-0.012911		-0.03919	-0.030279	-0.032324	-0.000799	-0.011676
Pf3D7_03_v3	788203	789062	PF3D7_0318700	conserved Plasmodium protein, unknown function	-0.02642	0.034477	-0.216177		-0.014787	-0.072562	0.220619	0.174456	0.021035
Pf3D7_03_v3	789608	791558	PF3D7_0318800	triosephosphate isomerase, putative	0.010503	0.000265	0.042233		0.045001	0.143536	0.08686	0.134401	0.176588
Pf3D7_03_v3	791590	793731	PF3D7_0318900	conserved protein, unknown function	0.019925	0.029399	0.070534		-0.088123	-0.005636	-0.11252	0.089694	0.046467
Pf3D7_03_v3	795327	801421	PF3D7_0319000	P-type ATPase, putative	0.006289	0.023357	-0.018297		0.005976	-0.001354	-0.077672	-0.000682	-0.006126
Pf3D7_03_v3	802010	802833	PF3D7_0319100	E3 ubiquitin-protein ligase RBX1, putative	-0.012485	-0.15342	-0.025272		0.012407	0.040447	0.034409	0.103867	0.020271
Pf3D7_03_v3	803342	806562	PF3D7_0319200	CCR4 domain-containing protein 4, putative	0.002411	-0.027728	-0.022948		0.01582	0.113877	-0.119417	0.039201	0.097351
Pf3D7_03_v3	807027	808109	PF3D7_0319300	ubiquitin-conjugating enzyme E2, putative	-0.005914	-0.059852	0.001288		-0.08338	0.114362	0.047378	0.001113	0.045187
Pf3D7_03_v3	809831	814422	PF3D7_0319400	kinesin-8, putative	-0.009709	0.029184	-0.002156		-0.046521	-0.008626	-0.061094	0.042951	0.024227
Pf3D7_03_v3	815319	817105	PF3D7_0319500	RNA-binding protein, putative	-0.003688	0.05242	0.131547		0.015693	0.089181	0.117445	0.17249	0.071928
Pf3D7_03_v3	817663	818945	PF3D7_0319600	elongation factor 1-delta, putative	-0.007288	0.13508	0.042302		-0.07164	0.008399	-0.069255	0.036606	0.025992
Pf3D7_03_v3	820458	830939	PF3D7_0319700	ABC transporter I family member 1, putative	0.002644	-0.016804	-0.014393		-0.021134	0.028565	-0.05224	0.04154	0.021723
Pf3D7_03_v3	830940	832759	PF3D7_0319800	conserved Plasmodium protein, unknown function	0.022605	0.034624	0.065417		-0.079486	0.003529	-0.107946	-0.017221	0.099785
Pf3D7_03_v3	833583	835027	PF3D7_0319900	conserved protein, unknown function	0.017233	-0.081493	0.022527		-0.067049	-0.187715	-0.167696	-0.053175	-0.192113
Pf3D7_03_v3	837057	838521	PF3D7_0320000	protein phosphatase inhibitor 2	0.021926	0.0951	0.101216		0.105174	0.15458	-0.015346	0.105282	0.229562
Pf3D7_03_v3	840112	842008	PF3D7_0320100	protein transport protein SEC22	-0.021076	-0.111673	-0.000369		0.219661	0.197003	0.022465	0.119894	0.228204
Pf3D7_03_v3	842289	844540	PF3D7_0320200	CPW-WPC family protein	-0.011006	-0.029899	0.092154		0.06439	0.061141	-0.024762	0.166352	0.084118
Pf3D7_03_v3	845463	847570	PF3D7_0320300	T-complex protein 1 subunit epsilon	-0.038438	-0.004976	0.076685		0.044407	0.03307	-0.031201	-0.007126	-0.017932
Pf3D7_03_v3	847997	857754	PF3D7_0320400	oocyst capsule protein Cap380	-0.015788	0.022503	0.035275		0.088589	0.079922	-0.064075	0.028736	0.069838
Pf3D7_03_v3	860563	862352	PF3D7_0320500	nicotinamidase, putative	-0.020994	-0.028577	-0.007676		0.009369	-0.06603	0.048218	-0.091593	0.011881
Pf3D7_03_v3	862491	864082	PF3D7_0320600	conserved protein, unknown function	-0.016497	0.299835	0.137918		0.082667	0.291662	0.21651	0.221576	0.336633
Pf3D7_03_v3	864764	866670	PF3D7_0320700	signal peptidase complex subunit 2	-0.040382	0.12396	0.049933		0.028685	0.042476	0.098907	0.088002	0.105955
Pf3D7_03_v3	870567	872592	PF3D7_0320800	ATP-dependent RNA helicase DDX6	-0.009849	-0.047316	-0.089957		0.088454	0.04432	0.039922	0.027201	0.112302
Pf3D7_03_v3	874963	876545	PF3D7_0320900	histone H2A.Z	-0.006853	0.089548	0.097018		0.008832	0.032054	-0.022843	0.019921	-0.010079
Pf3D7_03_v3	877485	879735	PF3D7_0321000	conserved protein, unknown function	-0.014557	-0.017561	-0.004255		0.067308	0.070662	-0.013163	-0.01091	0.065147
Pf3D7_03_v3	879736	885743	PF3D7_0321100	conserved Plasmodium protein, unknown function	0.001626	-0.058118	0.015408		-0.013028	-0.046613	-0.10069	-0.050778	0.011132
Pf3D7_03_v3	886712	889226	PF3D7_0321200	UDP-N-acetylglucosamine--dolichyl-phosphate N-acetylglucosaminephosphotransferase, putative	0.039152	0.05661	0.069667		0.075676	0.080617	0.123973	0.096114	0.107012
Pf3D7_03_v3	889764	893014	PF3D7_0321300	conserved Plasmodium protein, unknown function	0.003668	0.05789	-0.046332		-0.066639	-0.040599	0.030078	0.050476	-0.053481
Pf3D7_03_v3	894511	896329	PF3D7_0321400	protein kinase, putative	0.014244	-0.037804	-0.047877		0.068197	-0.038387	-0.050588	0.012299	0.073091
Pf3D7_03_v3	896330	900020	PF3D7_0321500	peptidase, putative	-0.013143	-0.040149	0.00899		-0.001212	0.066512	-0.116583	-0.012604	0.064328
Pf3D7_03_v3	900607	903566	PF3D7_0321600	ATP-dependent RNA helicase DDX42, putative	-0.001293	0.017338	0.031794		0.015358	0.023825	-0.028898	0.049553	0.005106
Pf3D7_03_v3	903567	910368	PF3D7_0321700	conserved Plasmodium protein, unknown function	-0.021652	0.017287	-0.006504		-0.047078	-0.04137	-0.066478	-2.8e-05	0.012198
Pf3D7_03_v3	912666	921286	PF3D7_0321800	WD repeat-containing protein, putative	0.006832	-0.037053	-0.066436		-0.028319	-0.0621	-0.044915	0.001431	-0.066077
Pf3D7_03_v3	922724	928192	PF3D7_0321900	cyclic amine resistance locus protein	-0.00712	0.029934	0.008133		-0.034535	0.007874	0.018905	0.03514	0.032853
Pf3D7_03_v3	928394	929409	PF3D7_0322000	peptidyl-prolyl cis-trans isomerase	-0.024479	-0.117008	-0.088299		-0.056133	-0.024234	0.075005	0.119206	-0.018204
Pf3D7_03_v3	930390	932665	PF3D7_0322100	mRNA-capping enzyme subunit beta	0.012854	-0.049025	-0.005558		-0.099798	-0.03849	-0.022473	-0.04394	0.040105
Pf3D7_03_v3	932938	937256	PF3D7_0322200	conserved Plasmodium protein, unknown function	-0.034971	0.089713	0.088123		0.031832	0.062397	-0.03359	-0.001955	0.103428
Pf3D7_03_v3	937962	940423	PF3D7_0322300	diacylglycerol O-acyltransferase	-0.021942	0.0416	0.067795		0.032663	0.012668	-0.035769	0.108371	0.022511
Pf3D7_03_v3	942295	945419	PF3D7_0322400	regulator of initiation factor 2 (eIF2)	0.019993	-0.012469	-0.078896		-0.030316	-0.00329	0.033101	0.018964	0.071431
Pf3D7_03_v3	945420	947001	PF3D7_0322500	iron-sulfur assembly protein, putative	-0.028375	0.004527	-0.292406		0.0435	-0.034813	0.073875	0.117632	0.042603
Pf3D7_03_v3	948124	952828	PF3D7_0322600	conserved Plasmodium protein, unknown function	0.000967	-0.096937	0.016486		0.010956	-0.002503	0.155229	0.005102	0.022647
Pf3D7_03_v3	952829	962617	PF3D7_0322700	conserved Plasmodium protein, unknown function	-0.006789	0.062218	0.050271		-0.023677	-0.040958	0.020312	0.018674	-0.034577
Pf3D7_03_v3	963851	965378	PF3D7_0322800	conserved Plasmodium protein, unknown function	-0.068341	-0.035681	-0.053909		0.01903	-0.022868	0.034927	0.272989	0.064507
Pf3D7_03_v3	965379	966752	PF3D7_0322900	40S ribosomal protein S3A, putative	0.015522	-0.090066	0.022411		-0.085974	-0.042447	-0.068436	-0.008646	-0.019723
Pf3D7_03_v3	970916	976044	PF3D7_0323100	conserved Plasmodium protein, unknown function	0.000427	-0.003848	-0.04761		-0.046354	-0.088904	-0.016451	-0.006654	-0.033126
Pf3D7_03_v3	976620	978445	PF3D7_0323200	conserved Plasmodium protein, unknown function	-0.042783	0.079095	0.034116		-0.112906	0.003024	-0.006941	-0.001679	0.047805
Pf3D7_03_v3	978720	980488	PF3D7_0323300	conserved protein, unknown function	0.019586	0.080446	0.049444		-0.026881	-0.011573	0.014607	-0.011095	0.021516
Pf3D7_03_v3	980489	984216	PF3D7_0323400	Rh5 interacting protein	-0.010639	0.062141	0.104443		-0.024576	-0.032097	0.030357	-0.064402	0.043796
Pf3D7_03_v3	986015	987860	PF3D7_0323500	survival motor neuron-like protein	0.017829	0.009196	-0.088933		0.035065	0.045252	0.041555	-0.063534	0.091209
Pf3D7_03_v3	988381	991132	PF3D7_0323600	conserved Plasmodium protein, unknown function	-0.00473	0.118805	0.173248		0.013543	0.026489	0.224962	0.02711	0.045273
Pf3D7_03_v3	991294	993875	PF3D7_0323700	U4/U6.U5 tri-snRNP-associated protein 1, putative	-0.009861	0.103408	-0.021815		0.095249	0.058987	0.235407	0.026672	0.140746
Pf3D7_03_v3	998399	1001832	PF3D7_0323800	conserved Plasmodium protein, unknown function	0.008588	0.1923	0.158396		-0.052383	-0.000226	-0.027895	-0.061001	-0.000459
Pf3D7_03_v3	1002622	1004517	PF3D7_0323900	erythrocyte membrane protein 1 (PfEMP1), exon 2, pseudogene	-0.005103	0.085953	0.164119		-0.357179	-0.427175	-0.278653	-0.280927	-0.365245
Pf3D7_04_v3	92326	94059	PF3D7_0401600	rifin	-0.006397	0.128551	0.138161		-0.038209	0.335422	-0.142162	0.103808	0.329541
Pf3D7_04_v3	100434	102360	PF3D7_0401700	Plasmodium exported protein, unknown function, pseudogene	0.014439	0.154425	0.228895		-0.110234	0.300268	-0.205472	0.148518	0.292619
Pf3D7_04_v3	103492	105853	PF3D7_0401800	Plasmodium exported protein (PHISTb), unknown function	-0.042435	-0.052789	0.066993		-0.017836	0.303609	-0.214366	0.059879	0.243749
Pf3D7_04_v3	108130	111545	PF3D7_0401900	acyl-CoA synthetase	0.00428	0.10874	0.084306		-0.056133	0.274259	-0.176128	0.080804	0.265586
Pf3D7_04_v3	114351	116308	PF3D7_0402000	Plasmodium exported protein (PHISTa), unknown function	-0.01011	0.175584	0.211643		-0.123581	0.19219	-0.230553	-0.024947	0.251631
Pf3D7_04_v3	123338	125714	PF3D7_0402100	Plasmodium exported protein (PHISTb), unknown function	-0.016527	0.195947	0.259397		0.038819	0.241576	-0.194952	-0.002475	0.277074
Pf3D7_04_v3	127462	134718	PF3D7_0402200	surface-associated interspersed protein 4.1 (SURFIN 4.1), pseudogene	0.010978	0.168674	0.180258		-0.030642	0.229731	-0.175763	0.034075	0.271324
Pf3D7_04_v3	137390	146903	PF3D7_0402300	reticulocyte binding protein homologue 1	0.001827	0.119813	0.090034		-0.08701	0.194749	-0.348227	0.051367	0.240177
Pf3D7_04_v3	147240	148630	PF3D7_0402400	Plasmodium exported protein, unknown function	0.02417	0.108779	0.070747		-0.113559	0.154061	-0.388153	0.107618	0.148629
Pf3D7_04_v3	155627	157234	PF3D7_0402500	rifin, pseudogene	-0.046074	0.268953	0.235093		-0.004917	0.491004	0.115721	0.401338	0.509014
Pf3D7_04_v3	159029	160564	PF3D7_0402600	stevor	-0.030073	0.224388	0.224007		0.004985	0.634976	0.313086	0.641885	0.606618
Pf3D7_04_v3	162261	163974	PF3D7_0402700	rifin, pseudogene	-0.033447	0.228625	0.218929		-0.154549	0.248149	-0.030939	0.241424	0.262473
Pf3D7_04_v3	166743	172204	PF3D7_0402800	erythrocyte membrane protein 1 (PfEMP1), pseudogene	-0.051015	0.229582	0.162716		-0.030909	0.508755	0.160693	0.507437	0.521764
Pf3D7_04_v3	175138	177502	PF3D7_0403100	regulator of chromosome condensation, putative	-0.023267	0.092942	-0.010174		0.002107	0.068004	0.0468	0.042722	-0.028259
Pf3D7_04_v3	178268	180315	PF3D7_0403200	pre-mRNA splicing factor, putative	-0.013003	0.043596	-0.036158		-0.035383	0.003494	-0.038491	0.009263	-0.086134
Pf3D7_04_v3	182620	194962	PF3D7_0403400	conserved Plasmodium protein, unknown function	0.002002	0.043378	0.018626		-0.021605	-0.021125	-0.035486	-0.005515	-0.000616
Pf3D7_04_v3	195293	196995	PF3D7_0403500	ubiquitin specific protease, putative	-0.02513	0.0306	-0.050808		-0.070973	-0.070432	-0.040221	0.011167	-0.079847
Pf3D7_04_v3	197596	201458	PF3D7_0403600	conserved Plasmodium protein, unknown function	-0.008976	0.062779	0.032722		-0.056736	-0.064378	-0.050754	0.00348	-0.052323
Pf3D7_04_v3	205978	209644	PF3D7_0403700	pre-mRNA-splicing factor CLF1, putative	-0.008245	0.0388	0.044655		0.001042	0.077963	0.089958	0.103239	0.100303
Pf3D7_04_v3	211400	214104	PF3D7_0403800	alpha/beta hydrolase, putative	0.002832	-0.054243	-0.051253		0.014885	0.007554	-0.006235	-0.001662	-0.025497
Pf3D7_04_v3	218837	223088	PF3D7_0403900	SET domain protein, putative	0.008528	-0.105574	-0.050656		0.043901	-0.019506	0.02772	0.063661	0.066391
Pf3D7_04_v3	223461	224381	PF3D7_0404000	conserved Plasmodium protein, unknown function	0.004337	-0.027914	0.075499		0.043523	0.126714	0.094715	0.154046	0.098978
Pf3D7_04_v3	224529	231983	PF3D7_0404100	AP2 domain transcription factor AP2-SP2, putative	-0.002006	0.042923	-0.006315		-0.055922	-0.034906	-0.094543	0.022968	0.021026
Pf3D7_04_v3	232345	233499	PF3D7_0404200	conserved Plasmodium protein, unknown function	-0.047194	0.085064	0.034304		0.022673	0.01411	-0.009031	0.049927	0.056626
Pf3D7_04_v3	233764	237263	PF3D7_0404300	conserved Plasmodium protein, unknown function	-0.018259	0.06038	0.100363		0.065778	0.086162	0.061639	0.117558	0.155357
Pf3D7_04_v3	238110	239749	PF3D7_0404400	6-cysteine protein P36	-0.001146	-0.065212	-0.000958		0.075803	-0.012612	0.087768	0.033404	-0.036533
Pf3D7_04_v3	240661	242597	PF3D7_0404500	6-cysteine protein P52	0.002998	-0.033406	-0.038043		-0.03273	-0.010888	-0.030531	-0.02083	0.049638
Pf3D7_04_v3	247481	260300	PF3D7_0404600	conserved Plasmodium membrane protein, unknown function	-0.017984	0.017772	0.036444		-0.011648	0.018434	-0.077052	0.066161	-0.017038
Pf3D7_04_v3	260301	263668	PF3D7_0404700	dipeptidyl aminopeptidase 3	-0.012455	0.027973	0.03742		-0.033191	-0.003924	0.04444	-0.008965	-0.026025
Pf3D7_04_v3	264055	266420	PF3D7_0404800	conserved Plasmodium protein, unknown function	-0.010808	0.040161	-0.049023		0.01976	-0.02116	-0.053221	0.070623	-0.054421
Pf3D7_04_v3	266994	268630	PF3D7_0404900	6-cysteine protein P41	-0.005309	0.022215	-0.033123		0.023136	0.067981	-0.051336	0.028708	0.061406
Pf3D7_04_v3	268710	271384	PF3D7_0405000	ATP-dependent RNA helicase DDX51, putative	-0.009136	0.050167	0.042114		0.003938	0.137328	0.021045	0.037122	0.066147
Pf3D7_04_v3	272005	277074	PF3D7_0405100	protein transport protein Sec24B, putative	-0.001995	0.049756	0.028927		0.02368	0.117125	-0.04103	0.039454	0.04238
Pf3D7_04_v3	278822	282193	PF3D7_0405200	ag-1 blood stage membrane protein homologue	0.003776	-0.079198	0.026741		0.101616	0.151772	0.011217	0.141839	0.058999
Pf3D7_04_v3	282194	288547	PF3D7_0405300	liver specific protein 2, putative	0.008175	0.068022	0.034573		-0.005533	0.06834	-0.047242	0.020271	-0.024649
Pf3D7_04_v3	291001	301117	PF3D7_0405400	pre-mRNA-processing-splicing factor 8, putative	0.006847	0.072276	0.060162		-0.028288	0.057976	-0.0164	0.011284	0.042639
Pf3D7_04_v3	301118	302517	PF3D7_0405500	conserved Plasmodium protein, unknown function	-0.03455	0.011466	0.112649		0.066901	0.179981	-0.075469	0.023415	0.17022
Pf3D7_04_v3	303079	305544	PF3D7_0405600	TMEM33 domain-containing protein, putative	0.000414	0.082282	-0.040833		-0.013383	0.041713	0.007091	0.046541	0.13865
Pf3D7_04_v3	305545	313243	PF3D7_0405700	lysine decarboxylase, putative	-0.004797	0.029321	0.03659		-0.008	0.029746	-0.062739	0.020908	0.028465
Pf3D7_04_v3	316290	319428	PF3D7_0405900	apical sushi protein	-0.01692	0.068315	0.009448		-0.01872	-0.055352	-0.076601	-0.004668	-0.020344
Pf3D7_04_v3	320769	322795	PF3D7_0406000	conserved protein, unknown function	0.006746	0.043858	0.022949		-0.024684	-0.042846	0.033829	0.02359	-0.036236
Pf3D7_04_v3	323017	325475	PF3D7_0406100	V-type proton ATPase subunit B	-0.023153	0.045144	-0.008289		-0.034762	-0.002371	0.06462	0.052083	0.038965
Pf3D7_04_v3	328966	329939	PF3D7_0406200	sexual stage-specific protein precursor	-0.032072	-0.019718	-0.057716		0.005607	0.086124	0.026619	0.083517	0.05693
Pf3D7_04_v3	331793	334069	PF3D7_0406400	cytosolic glyoxalase II	0.003253	0.059421	0.05406		-0.075891	-0.00681	-0.0291	0.019825	0.065234
Pf3D7_04_v3	334070	344304	PF3D7_0406500	NYN domain-containing protein, putative	-0.0167	0.115935	0.099917		0.055302	0.084802	0.086141	0.099297	0.053421
Pf3D7_04_v3	347208	351513	PF3D7_0406700	conserved Plasmodium protein, unknown function	0.00012	0.027472	0.109859		-0.072723	0.006136	-0.058173	-0.040846	0.003243
Pf3D7_04_v3	351514	353233	PF3D7_0406800	ribosomal protein L25, putative	-0.009662	0.135875	0.236143		-0.0078	0.080421	0.169152	0.123932	0.036539
Pf3D7_04_v3	353405	360128	PF3D7_0406900	conserved Plasmodium protein, unknown function	-0.00541	-0.001295	0.026972		-0.033137	0.029903	-0.048246	-0.008758	0.043038
Pf3D7_04_v3	360297	362014	PF3D7_0407000	conserved Plasmodium protein, unknown function	-0.00958	0.085705	0.213272		0.051014	0.160679	0.089197	0.135844	0.173419
Pf3D7_04_v3	362051	363520	PF3D7_0407100	methyltransferase, putative	0.030954	-0.045595	-0.04133		-0.052959	-0.024342	-0.063154	-0.009711	0.020521
Pf3D7_04_v3	363521	365183	PF3D7_0407200	peptidyl-tRNA hydrolase 2, putative	-0.036341	-0.039939	-0.129677		0.020919	0.064524	0.066142	0.084213	0.079202
Pf3D7_04_v3	366129	367591	PF3D7_0407300	transcription factor, putative	-0.02163	0.070384	0.013166		-0.161462	0.015332	0.03914	0.010503	0.042238
Pf3D7_04_v3	369635	371520	PF3D7_0407500	mitochondrial carrier protein, putative	0.007008	-0.186354	-0.093173		0.037262	0.055335	-0.04319	0.064909	0.061073
Pf3D7_04_v3	372789	376927	PF3D7_0407600	conserved Plasmodium protein, unknown function	-0.00546	-0.031463	0.04932		-0.07202	-0.033706	-0.105164	0.052406	-0.065701
Pf3D7_04_v3	377231	383337	PF3D7_0407700	conserved Plasmodium protein, unknown function	-0.011647	0.017049	0.06309		-0.013781	-0.013209	-0.078108	0.033097	0.013848
Pf3D7_04_v3	384674	391056	PF3D7_0407800	conserved Plasmodium protein, unknown function	-0.01002	-0.011032	0.001352		0.008106	0.010329	-0.080459	0.012383	-0.048648
Pf3D7_04_v3	391097	393600	PF3D7_0407900	AAA family ATPase, putative	0.031522	0.035159	0.030651		0.034849	0.059381	0.031742	0.011327	0.043898
Pf3D7_04_v3	397078	400943	PF3D7_0408100	conserved Plasmodium protein, unknown function	-0.025409	-0.008455	0.07132		-0.045034	-0.035062	-0.117374	-0.10729	-0.057143
Pf3D7_04_v3	401216	403480	PF3D7_0408200	conserved Plasmodium protein, unknown function	0.018161	0.051243	0.043856		-0.096497	-0.063946	0.078091	0.067356	0.024017
Pf3D7_04_v3	403481	405616	PF3D7_0408300	zinc finger Ran-binding domain-containing protein 2, putative	0.018944	0.01585	0.003962		0.002719	-0.045602	0.068058	0.00441	-0.05859
Pf3D7_04_v3	405983	408159	PF3D7_0408400	conserved protein, unknown function	-0.011822	-0.075592	-0.06548		-0.059853	0.039995	-0.126767	0.02892	0.062724
Pf3D7_04_v3	408429	410947	PF3D7_0408500	flap endonuclease 1	0.019279	0.0223	-0.037967		-0.064829	-0.112707	-0.173934	0.016394	-0.064713
Pf3D7_04_v3	413153	416607	PF3D7_0408600	sporozoite invasion-associated protein 1	0.007647	-0.039742	0.028367		0.01146	0.032969	-0.037336	0.07633	0.059701
Pf3D7_04_v3	417122	421074	PF3D7_0408700	perforin-like protein 1	-0.003864	0.08185	0.08191		-0.072667	-0.004631	-0.033552	-0.037149	0.023593
Pf3D7_04_v3	421761	423208	PF3D7_0408800	conserved Plasmodium protein, unknown function	-0.03378	0.048036	0.038705		-0.074817	-0.006773	0.041845	-0.069591	0.021202
Pf3D7_04_v3	424050	427429	PF3D7_0408900	tRNA N6-adenosine threonylcarbamoyltransferase	-0.010008	0.036889	-0.019209		-0.056832	0.01554	-0.012754	0.062479	0.040674
Pf3D7_04_v3	427430	435617	PF3D7_0409000	conserved Plasmodium protein, unknown function	-0.013689	-0.024924	0.025306		0.059511	0.109615	-0.068735	0.076838	0.105307
Pf3D7_04_v3	435967	438231	PF3D7_0409100	U4/U6 small nuclear ribonucleoprotein PRP31, putative	0.01688	0.004357	0.004303		-0.007081	-0.006195	-0.00874	0.05543	0.066568
Pf3D7_04_v3	438637	440585	PF3D7_0409200	protein SOF1, putative	-0.017392	0.07192	0.06866		0.069621	0.024324	-0.008612	0.074078	0.066469
Pf3D7_04_v3	440718	444492	PF3D7_0409300	methyltransferase, putative	-0.010918	0.067905	0.039457		0.007867	-0.002747	-0.05515	0.098285	0.030887
Pf3D7_04_v3	445750	448268	PF3D7_0409400	chaperone protein DnaJ	0.000922	0.004817	0.046137		-0.011641	0.03895	0.101966	0.09532	0.013302
Pf3D7_04_v3	448939	450883	PF3D7_0409500	NAD(P)-binding protein, putative	-0.0268	-0.066559	-0.111704		0.048256	0.052003	-0.065853	0.048294	0.011774
Pf3D7_04_v3	451884	455821	PF3D7_0409600	replication protein A1, large subunit	-0.002342	0.075758	0.10386		-0.026025	0.05821	0.045388	0.013293	-0.031393
Pf3D7_04_v3	456672	458270	PF3D7_0409700	peptide chain release factor 2	0.008222	-0.031288	-0.165046		0.126479	0.182619	0.079559	0.118203	0.147441
Pf3D7_04_v3	459460	461687	PF3D7_0409800	zinc finger protein, putative	-0.009428	-0.077854	-0.012434		0.011233	0.029426	-0.056464	-0.014539	0.002411
Pf3D7_04_v3	461741	464207	PF3D7_0409900	actin-like protein, putative	0.021306	0.113966	0.096748		-0.040425	-0.018177	-0.183543	0.020346	-0.053522
Pf3D7_04_v3	464482	467589	PF3D7_0410000	erythrocyte vesicle protein 1	-0.010327	-2.6e-05	0.002272		-0.096222	-0.020319	-0.021672	-0.04491	-0.045418
Pf3D7_04_v3	470278	473846	PF3D7_0410300	protein phosphatase PPM1, putative	0.012415	-0.002039	-0.039342		0.008716	0.058264	-0.014842	0.048086	0.006491
Pf3D7_04_v3	474292	475751	PF3D7_0410400	exosome complex component RRP4	0.003945	0.016434	0.022008		0.049539	0.090794	-0.026636	0.04491	0.021915
Pf3D7_04_v3	475752	476835	PF3D7_0410500	conserved Plasmodium protein, unknown function	0.055736	-0.009387	-0.041385		0.016327	0.185594	0.02342	0.032456	0.087437
Pf3D7_04_v3	478778	480718	PF3D7_0410600	conserved protein, unknown function	0.022177	0.081908	0.057542		0.00859	0.061779	0.061056	0.014817	0.077976
Pf3D7_04_v3	480927	484141	PF3D7_0410700	ribosome biogenesis GTPase A, putative	0.022706	-0.04697	0.004284		-0.024335	0.011044	0.022425	-0.049109	0.013803
Pf3D7_04_v3	485582	489978	PF3D7_0410800	conserved Plasmodium protein, unknown function	-0.014713	0.032489	0.051973		-0.106565	-0.037404	-0.104574	-0.051687	-0.023992
Pf3D7_04_v3	490192	493625	PF3D7_0410900	conserved Plasmodium protein, unknown function	0.012449	0.02174	0.037029		-0.038333	-0.053061	-0.060797	-0.00121	-0.030342
Pf3D7_04_v3	498918	504130	PF3D7_0411000	conserved Plasmodium protein, unknown function	-0.008199	-0.001321	0.039621		-0.076615	-0.007147	-0.050453	-0.009496	0.001306
Pf3D7_04_v3	504228	505345	PF3D7_0411100	mediator of RNA polymerase II transcription subunit 8, putative	-0.026943	-0.096438	-0.025418		0.065794	-0.083696	-0.108497	-0.032402	-0.083533
Pf3D7_04_v3	505683	509920	PF3D7_0411200	PP-loop family protein, putative	0.020878	-0.028867	0.023945		-0.062944	-0.045336	0.015316	-0.036563	-0.016121
Pf3D7_04_v3	510130	512798	PF3D7_0411300	conserved Plasmodium protein, unknown function	-0.005019	0.002524	0.040554		0.000424	-0.02886	-0.102008	-0.064961	-0.013699
Pf3D7_04_v3	512904	517318	PF3D7_0411400	DEAD box ATP-dependent RNA helicase, putative	-0.003184	-0.038263	-0.038879		0.000288	0.008438	0.030844	0.02239	0.032134
Pf3D7_04_v3	519582	525868	PF3D7_0411800	conserved Plasmodium protein, unknown function	0.003865	-0.005577	0.066883		-0.033026	0.054671	-0.063981	0.047593	0.046338
Pf3D7_04_v3	527942	534735	PF3D7_0411900	DNA polymerase alpha catalytic subunit A	-0.015622	0.060041	0.038438		-0.010923	0.033755	-0.083187	0.018089	0.007876
Pf3D7_04_v3	536524	539360	PF3D7_0412000	LITAF-like zinc finger protein, putative	-0.015219	0.020857	-0.000947		-0.102847	-0.074555	-0.062472	0.004281	-0.050603
Pf3D7_04_v3	539938	541448	PF3D7_0412100	30S ribosomal protein S12, mitochondrial, putative	-0.018042	0.086397	0.131341		-0.092356	0.014718	-0.127222	0.035163	0.024519
Pf3D7_04_v3	541561	543059	PF3D7_0412200	conserved Plasmodium protein, unknown function	0.006449	-0.160391	-0.014861		-0.072076	-0.043349	-0.06423	0.042295	-0.003527
Pf3D7_04_v3	543375	545497	PF3D7_0412300	phosphopantothenoylcysteine synthetase, putative	-0.013988	0.140717	0.179457		-0.09858	0.021609	0.08813	0.065853	0.02471
Pf3D7_04_v3	615106	616493	PF3D7_0413500	phosphoglucomutase-2	-0.004547	0.060514	0.073467		-0.126909	-0.082665	0.03668	0.059755	0.011066
Pf3D7_04_v3	616664	618600	PF3D7_0413600	26S protease regulatory subunit 6B, putative	-0.006635	-0.077047	-0.085119		-0.072301	-0.044085	-0.018625	-0.005117	-0.010783
Pf3D7_04_v3	619536	621052	PF3D7_0413700	lysine decarboxylase-like protein, putative	0.012361	-0.175407	-0.073145		-0.064233	0.040702	0.137995	0.001168	0.113534
Pf3D7_04_v3	621844	623052	PF3D7_0413800	50S ribosomal protein L10, putative	-0.01597	-0.020334	-0.111945		-0.066118	0.048674	-0.039841	-0.011452	0.016843
Pf3D7_04_v3	623053	626476	PF3D7_0413900	ubiquitin carboxyl-terminal hydrolase 13, putative	0.004462	0.001971	-0.079294		-0.006351	-0.041398	0.019824	-0.084789	0.083914
Pf3D7_04_v3	626641	633376	PF3D7_0414000	structural maintenance of chromosomes protein 3, putative	-0.02074	-0.049381	-0.016639		-0.004295	-0.061949	-0.052774	-0.073873	-0.002069
Pf3D7_04_v3	633779	639155	PF3D7_0414100	conserved Plasmodium membrane protein, unknown function	0.027926	-0.066242	-0.164464		-0.040256	-0.106797	-0.064095	-0.127133	-0.043394
Pf3D7_04_v3	647139	648638	PF3D7_0414200	calmodulin-like protein	-0.034322	0.035828	0.036005		0.013726	0.002401	0.132545	0.05084	0.028468
Pf3D7_04_v3	652100	653804	PF3D7_0414400	conserved Plasmodium protein, unknown function	0.033281	-0.107562	-0.023961		0.066471	0.098244	0.02042	-0.001334	0.155194
Pf3D7_04_v3	654775	657564	PF3D7_0414500	RNA-binding protein, putative	0.022888	-0.031989	-0.059504		-0.008586	-0.008287	-0.011779	-0.035187	0.046711
Pf3D7_04_v3	658370	659788	PF3D7_0414600	acylated pleckstrin-homology domain-containing protein, putative	-0.027309	0.038859	-0.090518		0.01881	0.043965	-0.057111	-0.011343	-0.065348
Pf3D7_04_v3	660374	662769	PF3D7_0414700	GTP-binding protein, putative	-0.010404	0.019501	0.018033		0.043591	0.04432	0.072823	-0.026204	0.003169
Pf3D7_04_v3	663166	664265	PF3D7_0414800	conserved Plasmodium protein, unknown function	-0.008822	-0.071161	0.032295		-0.116839	-0.015707	-0.083671	-0.073135	-0.091627
Pf3D7_04_v3	665723	668362	PF3D7_0414900	armadillo-domain containing rhoptry protein	-0.000747	0.089682	0.041077		0.041169	0.211569	0.06105	0.127281	0.147827
Pf3D7_04_v3	668363	669967	PF3D7_0415000	arsenical pump-driving ATPase, putative	-0.022851	0.018459	0.055867		-0.09691	0.010088	0.097933	0.036923	-0.015707
Pf3D7_04_v3	670633	672312	PF3D7_0415100	conserved protein, unknown function	-0.013199	0.006828	-0.055592		-0.157964	-0.112322	-0.133288	-0.130595	-0.08492
Pf3D7_04_v3	672313	679388	PF3D7_0415200	conserved Plasmodium protein, unknown function	0.010006	-0.022095	-0.020798		-0.020498	-0.01789	-0.050288	0.015011	-0.062792
Pf3D7_04_v3	681560	686191	PF3D7_0415300	cdc2-related protein kinase 3	0.003302	-0.116531	-0.060397		-0.017694	-0.082586	0.064961	0.005467	-0.103023
Pf3D7_04_v3	686192	687290	PF3D7_0415400	coatomer subunit zeta, putative	-0.019294	-0.142454	0.044666		-0.000576	-0.053274	-0.027149	-0.100815	-0.040422
Pf3D7_04_v3	687942	689303	PF3D7_0415500	nuclear cap-binding protein subunit 2, putative	-0.001983	0.158398	0.19825		-0.035604	-0.087993	0.023051	0.059447	-0.017924
Pf3D7_04_v3	689390	690579	PF3D7_0415600	GTP:AMP phosphotransferase	0.016714	0.044605	-0.082123		0.075347	0.074756	0.079111	0.097298	-0.049681
Pf3D7_04_v3	690881	692766	PF3D7_0415700	conserved Plasmodium protein, unknown function	-0.035759	0.002989	-0.101315		0.085584	0.032742	-0.00755	-0.015021	0.04726
Pf3D7_04_v3	693656	696783	PF3D7_0415800	RING zinc finger protein, putative	-0.013246	-0.031617	-0.038467		-0.109143	-0.10926	-0.117665	-0.113887	-0.116203
Pf3D7_04_v3	697668	699018	PF3D7_0415900	60S ribosomal protein L15, putative	0.008068	0.044705	0.001556		-0.094108	-0.038903	-0.028643	0.010132	0.025783
Pf3D7_04_v3	701276	704412	PF3D7_0416000	RNA-binding protein, putative	-0.001549	0.016086	0.02927		-0.054495	-0.032904	-0.057474	-0.009708	-0.086353
Pf3D7_04_v3	706279	709234	PF3D7_0416100	glutamyl-tRNA(Gln) amidotransferase subunit A	0.019006	-0.076526	-0.034818		-0.053658	-0.02365	-0.026077	-0.087435	-0.073201
Pf3D7_04_v3	709235	710333	PF3D7_0416200	conserved protein, unknown function	-0.001615	-0.207134	-0.218431		0.082204	-0.006534	0.042103	0.042155	-0.04373
Pf3D7_04_v3	710842	715739	PF3D7_0416300	DNA helicase MCM9, putative	0.003406	0.036889	-0.034876		-0.003019	0.089795	-0.090675	0.027164	0.045775
Pf3D7_04_v3	717952	722863	PF3D7_0416400	histone acetyltransferase, putative	-0.00424	0.011016	-0.003418		-0.027408	-0.015821	-0.059625	0.002045	-0.029358
Pf3D7_04_v3	722864	724492	PF3D7_0416500	repressor of RNA polymerase III transcription MAF1	-0.045493	-0.083262	0.008268		-0.046522	-0.104558	-0.03965	-0.071462	-0.074708
Pf3D7_04_v3	726015	727378	PF3D7_0416600	prohibitin-like protein PHBL, putative	0.02736	-0.097658	0.027645		0.100009	-0.008398	-0.012876	0.052987	0.02696
Pf3D7_04_v3	727460	728229	PF3D7_0416700	CDGSH iron-sulfur domain-containing protein, putative	-0.016686	-0.058935	-0.234637		-0.017457	-0.094949	0.085196	0.062792	-0.05265
Pf3D7_04_v3	729712	731473	PF3D7_0416800	small GTP-binding protein sar1	0.01706	-0.00314	-0.092623		-0.098142	-0.020092	-0.077916	0.023678	-0.046684
Pf3D7_04_v3	732202	740122	PF3D7_0416900	conserved Plasmodium protein, unknown function	0.011415	-0.002995	0.013727		-0.055651	-0.012175	-0.083816	-0.024222	-0.070413
Pf3D7_04_v3	741899	743341	PF3D7_0417000	conserved Plasmodium protein, unknown function	0.011731	-0.01144	0.038879		-0.084826	0.009576	-0.107774	-0.045503	0.021578
Pf3D7_04_v3	743361	745887	PF3D7_0417100	mRNA-binding protein PUF2	0.000188	-0.05463	-0.038638		0.113071	0.078115	-0.028894	0.087973	0.118761
Pf3D7_04_v3	747838	750164	PF3D7_0417200	bifunctional dihydrofolate reductase-thymidylate synthase	0.038208	-0.15785	-0.074262		-0.01392	-0.036651	0.032584	-0.007663	-0.010931
Pf3D7_04_v3	750610	753962	PF3D7_0417300	LETM1-like protein, putative	0.001489	-0.055948	-0.0154		0.090669	0.047334	0.060896	0.029586	0.057621
Pf3D7_04_v3	756044	776853	PF3D7_0417400	conserved Plasmodium protein, unknown function	0.001474	-0.03467	0.027929		-0.057163	-0.032644	-0.005017	0.003019	-0.037285
Pf3D7_04_v3	776950	779674	PF3D7_0417500	memo-like protein	0.007567	0.037753	0.07471		0.069449	0.169035	0.106305	0.176177	0.201631
Pf3D7_04_v3	780000	783496	PF3D7_0417600	conserved Plasmodium protein, unknown function	-0.037065	-0.010808	0.003958		-0.023976	0.021819	0.034026	0.069609	0.050136
Pf3D7_04_v3	783944	786680	PF3D7_0417700	conserved Plasmodium protein, unknown function	-0.024152	-0.015209	0.030017		0.004685	0.027592	-0.065841	0.069876	0.108848
Pf3D7_04_v3	786993	789592	PF3D7_0417800	cdc2-related protein kinase 1	-0.00199	-0.047688	0.05007		-0.032709	-0.006276	0.004316	0.00644	0.074135
Pf3D7_04_v3	790474	793235	PF3D7_0417900	conserved Plasmodium protein, unknown function	-0.025312	0.019339	0.001008		-0.002082	-0.024672	-0.032633	-0.053204	0.0192
Pf3D7_04_v3	793577	810320	PF3D7_0418000	conserved Plasmodium protein, unknown function	0.005947	-0.006587	-0.001556		-0.011518	0.005389	-0.074868	0.015573	-0.012146
Pf3D7_04_v3	810745	814892	PF3D7_0418100	protein SOC1, putative	0.017444	0.018939	-0.034222		-0.131088	-0.058445	0.064923	-0.002728	-0.050531
Pf3D7_04_v3	817150	818939	PF3D7_0418200	eukaryotic translation initiation factor 3 subunit M, putative	-0.009251	0.020232	0.059778		-0.109214	-0.208849	-0.120306	-0.091607	-0.309104
Pf3D7_04_v3	819112	822590	PF3D7_0418300	conserved Plasmodium protein, unknown function	0.007848	-0.032645	0.016744		-0.064558	0.024739	-0.056028	-0.002464	-0.062969
Pf3D7_04_v3	829713	830791	PF3D7_0418400	conserved Plasmodium protein, unknown function	0.012284	0.052481	-0.031368		0.035388	0.174216	0.080904	0.075511	0.058677
Pf3D7_04_v3	830792	832678	PF3D7_0418500	trafficking protein particle complex subunit 3, putative	0.012893	0.019843	0.018851		-0.104452	0.11734	0.071232	0.093924	0.128872
Pf3D7_04_v3	834144	840679	PF3D7_0418600	regulator of chromosome condensation, putative	-0.008657	0.045471	0.041332		-0.040214	-0.019842	-0.044699	0.048553	0.004755
Pf3D7_04_v3	840946	843155	PF3D7_0418700	RNA-binding protein NOB1, putative	0.018465	-0.006684	0.095194		-0.050252	0.026695	-0.132072	-0.04357	0.065879
Pf3D7_04_v3	843312	845419	PF3D7_0418800	MOLO1 domain-containing protein, putative	0.012842	-0.056271	0.034977		-0.016885	0.042875	-0.039474	0.095258	0.054176
Pf3D7_04_v3	846981	849309	PF3D7_0418900	conserved protein, unknown function	0.015927	-0.078266	-0.075837		-0.002494	0.044738	0.050147	0.071942	0.084374
Pf3D7_04_v3	849543	852376	PF3D7_0419000	conserved Plasmodium protein, unknown function	0.012527	0.088449	0.144194		-0.019407	0.089727	-0.073911	-0.015174	0.078436
Pf3D7_04_v3	852377	853816	PF3D7_0419100	conserved Plasmodium protein, unknown function	-0.024154	-0.029465	0.059485		-0.089822	-0.053489	-0.149182	0.11573	-0.012454
Pf3D7_04_v3	855648	857299	PF3D7_0419300	conserved Plasmodium protein, unknown function	-0.009653	-0.049255	-0.073684		-0.002672	0.158621	0.145608	0.14499	0.120653
Pf3D7_04_v3	857748	866207	PF3D7_0419400	conserved Plasmodium protein, unknown function	-0.000558	0.011415	0.003942		-0.045362	0.007911	-0.105791	0.064902	0.012721
Pf3D7_04_v3	866251	868361	PF3D7_0419500	conserved Plasmodium membrane protein, unknown function	-0.026546	-0.054819	-0.044301		-0.07313	-0.026274	-0.054005	-0.014098	0.000972
Pf3D7_04_v3	870487	872123	PF3D7_0419600	ran-specific GTPase-activating protein 1, putative	0.02159	-0.019911	-0.11293		-0.022036	0.078902	0.009392	0.084068	0.014939
Pf3D7_04_v3	872888	874365	PF3D7_0419700	apical merozoite protein	-0.027664	-0.117897	-0.116387		0.030621	0.055144	0.095756	0.168003	0.025293
Pf3D7_04_v3	874561	875771	PF3D7_0419800	60S ribosomal protein L7ae/L30e, putative	0.025824	-0.034144	-0.029412		-0.054682	-0.038978	-0.189529	-0.027042	-0.015065
Pf3D7_04_v3	877772	894116	PF3D7_0419900	phosphatidylinositol 4-kinase, putative	-0.004826	0.019774	-0.012533		-0.03156	0.011323	-0.072746	0.027649	0.018487
Pf3D7_04_v3	894362	904974	PF3D7_0420000	zinc finger protein, putative	-0.00717	-0.055205	-0.04786		-0.045787	-0.003856	-0.067554	-0.006578	0.003488
Pf3D7_04_v3	906806	909051	PF3D7_0420100	serine/threonine protein kinase RIO2	-0.019564	0.014053	0.021976		0.053935	0.051015	0.011021	-0.002043	0.087793
Pf3D7_04_v3	909937	912221	PF3D7_0420200	holo-[acyl-carrier-protein] synthase, putative	0.001895	-0.073988	-0.027393		-0.027946	0.01546	0.015355	-0.04717	-0.026159
Pf3D7_04_v3	917740	928661	PF3D7_0420300	AP2 domain transcription factor, putative	-0.022051	0.04576	0.051717		-0.091646	-0.028498	-0.028042	-0.019176	-0.071021
Pf3D7_04_v3	929090	930272	PF3D7_0420400	ribosome-recycling factor	-0.007108	-0.067418	0.066644		-0.032482	0.058061	-0.12639	0.154944	0.022049
Pf3D7_04_v3	930273	931858	PF3D7_0420500	conserved Plasmodium protein, unknown function	-0.059797	0.114005	-0.005408		0.06644	0.202271	-0.115158	0.120364	0.178862
Pf3D7_04_v3	932213	934494	PF3D7_0420600	conserved Plasmodium protein, unknown function	-0.003399	-0.118607	0.032609		-0.04546	-0.069371	-0.092183	-0.013565	-0.109099
Pf3D7_04_v3	985885	987644	PF3D7_0421600	erythrocyte membrane protein 1 (PfEMP1)-like pseudogene	-0.011135	0.045141	0.048698		0.018579	-0.004584	-0.03375	0.048024	0.032631
Pf3D7_04_v3	987645	994610	PF3D7_0421700	conserved Plasmodium protein, unknown function	0.015198	0.049156	0.076147		-0.022301	0.055618	-0.055032	-0.031699	0.051922
Pf3D7_04_v3	998397	1000435	PF3D7_0422000	steroid dehydrogenase, putative	0.008005	-0.029886	-0.038301		0.07755	0.118979	0.129818	0.12096	0.162283
Pf3D7_04_v3	1001363	1003020	PF3D7_0422100	transmembrane emp24 domain-containing protein, putative	-0.033893	0.071459	-0.026886		0.050106	-0.041731	0.013387	-0.006981	-0.018561
Pf3D7_04_v3	1004212	1017497	PF3D7_0422200	erythrocyte membrane-associated antigen	-0.007869	-0.002357	0.024473		-0.018881	-0.048746	-0.042227	-0.021883	-0.020672
Pf3D7_04_v3	1022237	1024416	PF3D7_0422300	alpha tubulin 2	-0.023634	-0.054128	-0.006524		-0.055632	-0.030316	-0.143684	0.044534	0.052822
Pf3D7_04_v3	1026398	1027649	PF3D7_0422400	40S ribosomal protein S19	-0.005405	0.158788	0.037769		-0.04749	-0.188294	0.078786	-0.048649	-0.067264
Pf3D7_04_v3	1029079	1038203	PF3D7_0422500	pre-mRNA-splicing helicase BRR2, putative	-0.017778	-0.007212	0.019771		-0.005463	-0.065372	-0.051978	-0.009542	0.011099
Pf3D7_04_v3	1040220	1041892	PF3D7_0422700	eukaryotic initiation factor 4A-III, putative	-0.041615	0.035205	0.086683		-0.018421	0.018184	-0.038164	-0.006684	0.007365
Pf3D7_04_v3	1042314	1045138	PF3D7_0422800	serpentine receptor, putative	-0.041875	0.057586	0.223173		-0.068814	-0.031778	0.023185	0.037443	4.6e-05
Pf3D7_04_v3	1045139	1046946	PF3D7_0422900	methyltransferase, putative	-0.00271	0.056389	-0.050893		-0.037859	-0.096798	-0.050104	-0.050116	-0.03507
Pf3D7_04_v3	1047446	1048728	PF3D7_0423000	conserved Plasmodium protein, unknown function	-0.002971	-0.025626	0.031263		-0.045419	-0.13829	0.02287	0.026907	-0.13615
Pf3D7_04_v3	1049020	1050144	PF3D7_0423100	AP-4 complex subunit sigma, putative	-0.010094	0.05827	-0.019157		0.022165	0.012775	0.124339	-0.039969	0.083083
Pf3D7_04_v3	1051326	1053256	PF3D7_0423300	conserved Plasmodium protein, unknown function	0.008421	-0.009791	-0.114228		0.035138	-0.018832	-0.138604	0.003027	0.059053
Pf3D7_04_v3	1055415	1056568	PF3D7_0423400	apical asparagine-rich protein AARP	-0.025061	-0.116232	-0.142789		0.218146	0.077533	0.116793	0.13032	-0.056924
Pf3D7_04_v3	1058747	1060801	PF3D7_0423500	glideosome associated protein with multiple membrane spans 2	-0.000482	0.040406	0.004545		-0.023374	-0.091869	-0.034543	-0.042853	-0.032038
Pf3D7_04_v3	1061540	1066878	PF3D7_0423600	conserved Plasmodium protein, unknown function	0.013652	-0.060553	-0.036466		-0.011535	-0.145714	0.039463	-0.064366	-0.121908
Pf3D7_04_v3	1071185	1072095	PF3D7_0423700	early transcribed membrane protein 4	0.006038	0.227445	0.309767		-0.079816	-0.057126	0.130846	0.03817	0.076303
Pf3D7_04_v3	1076097	1077730	PF3D7_0423800	cysteine-rich protective antigen	-0.030989	-0.117387	-0.059257		0.057897	0.084503	0.075418	-0.036825	-0.025404
Pf3D7_04_v3	1077731	1078738	PF3D7_0423900	probable protein, unknown function	0.016177	-0.036166	0.09541		-0.095361	-0.11316	-0.053996	-0.079934	-0.09649
Pf3D7_04_v3	1080709	1082276	PF3D7_0424000	Plasmodium exported protein (PHISTc), unknown function	-0.011965	-0.042677	-0.012588		-0.011483	-0.127244	0.026859	-0.010466	-0.118433
Pf3D7_04_v3	1082277	1084400	PF3D7_0424100	reticulocyte binding protein homologue 5	-0.011407	0.008318	0.060007		-0.089248	-0.035608	0.067534	-0.043714	-0.144423
Pf3D7_04_v3	1085729	1091527	PF3D7_0424200	reticulocyte binding protein homologue 4	0.017843	0.070078	0.041292		-0.067448	-0.069073	-0.001406	-0.081879	-0.083141
Pf3D7_04_v3	1092888	1098085	PF3D7_0424300	erythrocyte binding antigen-165, pseudogene	0.014152	0.060434	0.025279		-0.072776	-0.022319	0.03564	-0.049969	-0.085331
Pf3D7_04_v3	1099561	1107361	PF3D7_0424400	surface-associated interspersed protein 4.2 (SURFIN 4.2)	0.005337	0.063511	0.023082		-0.021293	-7.7e-05	0.034688	-0.038684	-0.037588
Pf3D7_04_v3	1109810	1112543	PF3D7_0424500	serine/threonine protein kinase, FIKK family	-0.029284	0.02468	0.007771		-0.002834	0.033612	0.024939	-0.091484	-0.108375
Pf3D7_04_v3	1113095	1114736	PF3D7_0424600	Plasmodium exported protein (PHISTb), unknown function	0.017312	0.022899	0.041198		-0.014478	0.069915	0.053828	-0.049956	0.006483
Pf3D7_04_v3	1118180	1122664	PF3D7_0424700	serine/threonine protein kinase, FIKK family	-0.01244	-0.076319	-0.009669		-0.057807	-0.036879	0.146316	-0.022974	-0.034653
Pf3D7_04_v3	1123736	1125254	PF3D7_0424800	Plasmodium exported protein (PHISTb), unknown function	-0.034022	0.036349	0.051552		-0.089972	-0.085218	0.051417	-0.038327	-0.105399
Pf3D7_04_v3	1127529	1129052	PF3D7_0424900	Plasmodium exported protein (PHISTa), unknown function	-0.003178	0.087471	-0.007546		-0.10852	-0.114589	0.073201	-0.014125	-0.176917
Pf3D7_04_v3	1129410	1131143	PF3D7_0425000	Plasmodium exported protein, unknown function, pseudogene	0.005091	-0.05507	-0.033719		-0.005091	-0.062182	0.107095	0.007035	0.019689
Pf3D7_04_v3	1136336	1137635	PF3D7_0425200	Plasmodium exported protein (hyp15), unknown function	-0.001897	-0.041426	0.082017		0.04832	0.111086	0.103539	0.041926	0.100043
Pf3D7_04_v3	1140972	1142346	PF3D7_0425300	Plasmodium exported protein (PHISTa), unknown function, pseudogene	-0.000528	0.08133	-0.026111		-0.033746	0.057437	0.120783	0.106527	-0.060936
Pf3D7_05_v3	39193	40738	PF3D7_0500600	stevor, pseudogene	-0.007937	0.035759	0.039442		0.001644	-0.019427	0.144714	0.045595	-0.108349
Pf3D7_05_v3	43077	48011	PF3D7_0500800	mature parasite-infected erythrocyte surface antigen	-0.01247	0.080124	0.028633		-0.005578	0.019607	0.185655	0.012814	-0.053952
Pf3D7_05_v3	50172	52760	PF3D7_0500900	serine/threonine protein kinase, FIKK family	-0.00614	-0.040277	0.018832		-0.038968	-0.002345	0.136475	-0.069697	0.006621
Pf3D7_05_v3	55591	57122	PF3D7_0501000	Plasmodium exported protein, unknown function	-0.004674	-0.101927	-0.032098		0.033709	0.007758	0.069547	-0.060843	0.012725
Pf3D7_05_v3	57787	59976	PF3D7_0501100	heat shock protein 40, type II	-0.015539	0.022247	0.086853		-0.016367	-0.099975	0.065534	-0.05418	-0.146719
Pf3D7_05_v3	63815	65739	PF3D7_0501200	parasite-infected erythrocyte surface protein	0.00686	0.110431	0.106358		-0.103282	-0.054091	-0.011033	-0.043098	-0.122889
Pf3D7_05_v3	68680	70363	PF3D7_0501300	skeleton-binding protein 1	0.018622	0.025531	0.038727		0.048203	0.022652	0.032709	0.071518	-0.002001
Pf3D7_05_v3	74259	80092	PF3D7_0501400	interspersed repeat antigen	-0.025858	-0.197316	-0.140569		0.040432	0.012406	-0.012678	0.061864	-0.012327
Pf3D7_05_v3	80884	82586	PF3D7_0501500	rhoptry-associated protein 3	-0.007466	0.033812	0.140834		0.021801	0.019789	0.036455	-0.077314	0.058126
Pf3D7_05_v3	83791	85487	PF3D7_0501600	rhoptry-associated protein 2	-0.005619	0.035486	-0.002221		0.03602	0.002394	-0.148408	-0.103975	0.022395
Pf3D7_05_v3	86570	89451	PF3D7_0501700	anaphase-promoting complex subunit 3, putative	0.0274	0.035299	0.008697		0.005538	-0.076822	0.087249	-0.081973	-0.076077
Pf3D7_05_v3	91111	94841	PF3D7_0501800	chromatin assembly factor 1 subunit A	0.008356	0.007788	0.031755		0.031458	-0.053167	-0.01547	-0.104766	-0.023854
Pf3D7_05_v3	94911	96883	PF3D7_0501900	conserved protein, unknown function	-0.021012	0.032257	0.00658		-0.021633	-0.009323	-0.104225	-0.013582	-0.019597
Pf3D7_05_v3	97407	102044	PF3D7_0502000	vacuolar protein sorting-associated protein 11, putative	0.005213	-0.046036	-0.094776		0.01592	-0.050826	-0.031016	-0.053276	0.050133
Pf3D7_05_v3	102045	103147	PF3D7_0502100	HCNGP-like protein	-0.036447	-0.159568	-0.17346		-0.099936	-0.195773	-0.185409	-0.198126	-0.164952
Pf3D7_05_v3	104006	105987	PF3D7_0502200	protein Mpv17, putative	0.001218	-0.047617	-0.166716		-0.039809	-0.196198	-0.073274	-0.098193	-0.092852
Pf3D7_05_v3	106825	108188	PF3D7_0502300	conserved Plasmodium protein, unknown function	-0.008611	0.006553	-0.046109		-0.02549	-0.07936	-0.188387	-0.027148	-0.062971
Pf3D7_05_v3	109648	111941	PF3D7_0502400	merozoite surface protein 8	-0.024373	0.22611	0.06041		-0.073191	-0.002618	0.114196	-0.000546	-0.032585
Pf3D7_05_v3	113899	116183	PF3D7_0502500	conserved Plasmodium protein, unknown function	0.000438	-0.077979	-0.089866		-0.088626	-0.008725	-0.095791	0.043791	0.009869
Pf3D7_05_v3	116201	120038	PF3D7_0502600	conserved Plasmodium protein, unknown function	-0.008483	0.100493	0.099954		-0.052328	-0.066656	-0.066666	-0.070806	-0.032577
Pf3D7_05_v3	120039	121705	PF3D7_0502700	conserved protein, unknown function	0.01314	-0.054455	0.003465		-0.064256	-0.034059	-0.11648	-0.067037	-0.017279
Pf3D7_05_v3	123098	124154	PF3D7_0502900	Tim10/DDP family zinc finger protein, putative	0.009119	0.066934	0.020898		-0.03332	-0.054853	-0.2647	-0.093494	-0.002209
Pf3D7_05_v3	124866	126764	PF3D7_0503000	50S ribosomal protein L28, apicoplast, putative	-0.021289	0.004834	-0.119472		-0.069823	-0.111854	0.030132	0.010179	-0.014008
Pf3D7_05_v3	126814	128927	PF3D7_0503100	4-diphosphocytidyl-2-C-methyl-D-erythritol kinase, putative	0.052933	-0.046451	-0.042155		0.057766	-0.054175	-0.037623	-0.01933	0.040998
Pf3D7_05_v3	130203	133642	PF3D7_0503200	conserved Plasmodium protein, unknown function	-0.008455	-0.023583	-0.048797		-0.056639	-0.041568	0.007735	-0.058593	0.021893
Pf3D7_05_v3	134754	136180	PF3D7_0503300	serine/arginine-rich splicing factor 12	0.002877	0.016914	-0.023831		-0.058656	-0.153243	-0.031882	-0.05415	-0.070262
Pf3D7_05_v3	140460	141721	PF3D7_0503400	actin-depolymerizing factor 1	0.004426	-0.005596	0.046786		0.004757	-0.037897	0.072652	-0.033903	-0.06047
Pf3D7_05_v3	142621	145673	PF3D7_0503500	protein kinase, putative	0.01424	0.063369	-0.058018		-0.035979	-0.059898	-0.09153	-0.023757	-0.083472
Pf3D7_05_v3	146389	150381	PF3D7_0503600	myosin B	-0.017903	0.105898	0.019415		-0.07884	-0.085193	-0.020108	-0.063522	-0.055539
Pf3D7_05_v3	151172	152634	PF3D7_0503800	60S ribosomal protein L31	0.029039	-0.085003	-0.010225		0.026865	-0.142265	-0.028717	-0.044973	-0.061722
Pf3D7_05_v3	153639	156307	PF3D7_0503900	conserved Plasmodium protein, unknown function	-0.00779	0.045694	0.006862		-0.085942	-0.035448	0.045388	0.039494	-0.0683
Pf3D7_05_v3	157375	165218	PF3D7_0504000	cation transporting P-ATPase	-0.00152	0.066408	0.090188		-0.019326	-0.035155	-0.022011	-0.012505	-0.000718
Pf3D7_05_v3	165400	166892	PF3D7_0504100	AN1-type zinc finger protein, putative	-0.010901	0.030916	-0.070165		0.005436	0.0278	0.10593	0.162732	0.079945
Pf3D7_05_v3	167399	169525	PF3D7_0504200	ATP-dependent RNA helicase DDX27, putative	-0.006315	-0.059414	0.002871		-0.01231	-0.008914	-0.01933	0.005339	0.025363
Pf3D7_05_v3	169526	170840	PF3D7_0504300	conserved Plasmodium protein, unknown function	-0.070471	-0.213397	0.064699		0.007029	0.058423	-0.055185	0.094563	0.149338
Pf3D7_05_v3	171900	174667	PF3D7_0504400	ATP-dependent helicase, putative	-0.00633	0.022249	0.023962		-0.005267	0.066055	0.01823	0.008243	0.062882
Pf3D7_05_v3	174739	176683	PF3D7_0504500	MOLO1 domain-containing protein, putative	-0.018771	0.055315	0.062714		-0.013621	0.083826	0.027443	0.091708	0.109254
Pf3D7_05_v3	177160	178805	PF3D7_0504600	2-oxoisovalerate dehydrogenase subunit beta, mitochondrial, putative	0.012079	-0.057252	-0.06944		-0.089724	-0.032462	-0.113083	0.020974	0.039232
Pf3D7_05_v3	180171	187641	PF3D7_0504700	centrosomal protein CEP120, putative	0.00693	0.01181	0.042763		-0.046667	-0.008354	0.121706	-0.004748	-0.030921
Pf3D7_05_v3	187642	204982	PF3D7_0504800	conserved Plasmodium protein, unknown function	-0.004966	0.022421	0.081579		-0.011824	-0.012101	0.020368	0.007472	0.031453
Pf3D7_05_v3	206200	208625	PF3D7_0504900	conserved protein, unknown function	0.006556	0.134851	0.091112		-0.006414	-0.00262	0.053928	-0.023373	0.006449
Pf3D7_05_v3	208812	218439	PF3D7_0505000	MMS19-like protein, putative	0.006845	0.023633	0.046694		0.001011	0.035118	-0.018705	0.084158	0.050943
Pf3D7_05_v3	220589	229503	PF3D7_0505100	trafficking protein particle complex subunit 8, putative	-0.012232	0.032134	0.030923		0.039316	0.054199	-0.084659	0.014079	0.063671
Pf3D7_05_v3	230445	232642	PF3D7_0505200	actin-like protein, putative	0.010883	-0.03196	0.037531		-0.017557	-0.122056	-0.080101	0.002441	0.025599
Pf3D7_05_v3	233565	235896	PF3D7_0505300	UDP-N-acetylglucosamine transporter, putative	-0.03373	0.007212	-0.058252		0.029631	0.051913	-0.101936	0.113777	0.082
Pf3D7_05_v3	235897	238615	PF3D7_0505400	conserved protein, unknown function	0.002068	-0.060826	-0.035732		0.011403	-0.043616	-0.055248	-0.032949	-0.012056
Pf3D7_05_v3	239206	244130	PF3D7_0505500	DNA mismatch repair protein MSH6, putative	0.000958	0.122672	0.057821		0.019617	0.042338	0.019598	-0.003259	0.034614
Pf3D7_05_v3	245683	247184	PF3D7_0505600	conserved protein, unknown function	-0.01286	-0.018379	-0.076131		-0.003189	-0.114121	-0.171621	-0.166554	-0.166138
Pf3D7_05_v3	247551	250825	PF3D7_0505700	conserved Plasmodium membrane protein, unknown function	0.016217	-0.041135	-0.078189		0.011619	-0.030935	0.060261	-0.014512	-0.066324
Pf3D7_05_v3	251797	252856	PF3D7_0505800	small ubiquitin-related modifier	0.055012	-0.138996	-0.063881		0.011161	-0.030618	-0.109534	0.000177	-0.114649
Pf3D7_05_v3	254223	255767	PF3D7_0505900	mediator of RNA polymerase II transcription subunit 11, putative	-0.003528	-0.115538	-0.04902		0.042358	0.061212	-0.038439	0.038207	0.074505
Pf3D7_05_v3	255975	257563	PF3D7_0506000	conserved Plasmodium protein, unknown function	0.012385	-0.039567	0.003405		0.059509	0.083442	-0.06997	0.139128	0.120953
Pf3D7_05_v3	257564	259081	PF3D7_0506100	60S ribosomal subunit protein L24, putative	-0.029386	0.092353	0.08891		-0.008231	0.14447	0.012907	0.064668	0.038667
Pf3D7_05_v3	259514	260854	PF3D7_0506200	TATA-box-binding protein	-0.024942	0.114832	0.189406		-0.019613	0.011638	0.074908	0.062403	0.051854
Pf3D7_05_v3	260855	262428	PF3D7_0506300	conserved protein, unknown function	-0.051125	-0.003878	0.00867		-0.029469	0.003807	-0.025179	0.035558	-0.040175
Pf3D7_05_v3	262429	264175	PF3D7_0506400	conserved Plasmodium protein, unknown function	0.011259	0.016042	0.051984		0.037885	0.055184	-0.032361	0.036676	-0.025314
Pf3D7_05_v3	265345	278559	PF3D7_0506500	conserved Plasmodium protein, unknown function	0.01104	-0.065157	-0.042907		-0.04788	-0.019975	-0.093489	-0.001644	-0.013005
Pf3D7_05_v3	278560	279745	PF3D7_0506600	histone deacetylase, putative, pseudogene	-0.036906	0.027158	0.0895		-0.056807	-0.073206	0.054963	0.030937	-0.005734
Pf3D7_05_v3	280636	283595	PF3D7_0506700	GTPase-activating protein, putative	-0.02733	-0.065884	-0.038713		0.05759	0.095595	0.064279	0.082846	0.071736
Pf3D7_05_v3	284441	288273	PF3D7_0506800	transcription factor 25, putative	-0.004941	-0.005545	-0.033526		-0.005294	0.070519	0.005521	0.012053	0.049581
Pf3D7_05_v3	288526	291305	PF3D7_0506900	rhomboid protease ROM4	-0.022377	-0.027275	-0.023799		-0.043489	0.031196	-0.077802	0.009863	0.018039
Pf3D7_05_v3	294418	296153	PF3D7_0507100	60S ribosomal protein L4	-0.025584	-0.041138	-0.071859		0.042498	0.035759	0.033901	0.062122	0.127538
Pf3D7_05_v3	298177	300986	PF3D7_0507200	subtilisin-like protease 3	-0.006874	0.036588	0.144159		0.000293	0.053	0.043885	0.016617	0.101311
Pf3D7_05_v3	301680	304861	PF3D7_0507300	subtilisin-like ookinete protein SOPT	-0.018731	-0.064311	-0.05333		-0.045067	0.016301	-0.012141	-0.049773	0.005027
Pf3D7_05_v3	305711	306672	PF3D7_0507400	conserved Plasmodium protein, unknown function	0.046687	0.048516	-0.081842		0.018026	-0.020645	0.048508	0.001088	0.02626
Pf3D7_05_v3	307240	309806	PF3D7_0507500	subtilisin-like protease 1	0.015556	-0.014848	0.04946		-0.005748	0.037446	-0.031037	-0.031205	0.085704
Pf3D7_05_v3	312949	315407	PF3D7_0507600	protein CAF40, putative	0.002373	0.046059	0.017886		-0.056102	-0.008683	-0.012804	-0.052762	-0.012298
Pf3D7_05_v3	316516	318611	PF3D7_0507700	nuclear protein localization protein 4, putative	-0.002729	-0.075484	-0.054142		0.063743	0.029782	0.003887	0.016708	-0.061017
Pf3D7_05_v3	321989	327072	PF3D7_0507800	conserved protein, unknown function	-0.000539	-0.066662	-0.0731		-0.041912	-0.01823	-0.040202	-0.051205	-0.059056
Pf3D7_05_v3	328492	329965	PF3D7_0508000	6-cysteine protein	0.012042	-0.079949	-0.066775		-0.051021	0.002952	-0.111034	0.047161	-0.094279
Pf3D7_05_v3	331430	336954	PF3D7_0508100	SET domain protein, putative	-0.007448	0.021849	-0.010564		0.020184	0.071792	-0.030022	0.020254	0.028467
Pf3D7_05_v3	337176	339275	PF3D7_0508200	longevity-assurance (LAG1) protein, putative	-0.035703	-0.003213	-0.018856		0.038208	0.09418	-0.054632	0.048341	-0.019127
Pf3D7_05_v3	341955	343483	PF3D7_0508300	triose phosphate transporter	0.023749	-0.008004	-0.061649		-0.018404	0.063772	-0.100987	0.070213	-0.057349
Pf3D7_05_v3	344681	346981	PF3D7_0508400	conserved protein, unknown function	0.015502	-0.017253	-0.058613		0.004884	0.044341	0.027883	0.025993	0.032801
Pf3D7_05_v3	346982	355289	PF3D7_0508500	guanidine nucleotide exchange factor	-0.0005	0.033902	0.049378		-0.026449	0.030702	0.075934	0.023908	0.04171
Pf3D7_05_v3	355972	357260	PF3D7_0508600	conserved protein, unknown function	0.023128	-0.008004	-0.018828		0.010914	0.047192	0.0092	-0.059631	0.016121
Pf3D7_05_v3	358011	362983	PF3D7_0508700	pre-mRNA-processing ATP-dependent RNA helicase PRP5, putative	-0.024503	-0.037446	-0.016495		-0.014591	0.054489	0.030267	-0.006951	-0.011918
Pf3D7_05_v3	363338	364692	PF3D7_0508800	single-stranded DNA-binding protein	0.014622	0.055732	0.025657		0.005237	0.136187	-0.06065	0.044507	0.009842
Pf3D7_05_v3	366772	376640	PF3D7_0508900	conserved Plasmodium protein, unknown function	-0.003007	0.035163	0.030913		-0.050615	-0.02267	0.022781	0.001834	0.034649
Pf3D7_05_v3	376641	378702	PF3D7_0509000	alpha-soluble NSF attachment protein, putative	-0.014654	0.040242	0.097141		0.014659	0.074969	0.0078	0.074301	0.037382
Pf3D7_05_v3	380827	386453	PF3D7_0509100	structural maintenance of chromosomes protein 4, putative	-0.00775	-0.093145	0.018087		-0.032191	-0.045924	0.030953	-0.03065	-0.005865
Pf3D7_05_v3	386706	388600	PF3D7_0509200	leucine-rich repeat protein	0.026706	-0.178907	-0.203623		0.065802	0.066976	-0.176358	0.050661	0.025476
Pf3D7_05_v3	388601	389441	PF3D7_0509300	conserved Plasmodium protein, unknown function	0.009788	-0.083445	0.053978		0.073149	0.061793	0.015967	0.080627	-0.04335
Pf3D7_05_v3	389664	399247	PF3D7_0509400	RNA polymerase I	0.00654	-0.041809	-0.023388		-0.018782	-0.01628	0.007831	0.033173	-0.007489
Pf3D7_05_v3	401187	403021	PF3D7_0509500	ERCC4 domain-containing protein, putative	0.001058	0.076751	0.040826		0.068451	0.018456	-0.010579	0.06549	0.008322
Pf3D7_05_v3	403092	405801	PF3D7_0509600	asparagine--tRNA ligase	0.013981	-0.005119	-0.015582		0.010068	0.00115	0.019665	-0.058104	-0.00722
Pf3D7_05_v3	405802	408147	PF3D7_0509700	conserved Plasmodium protein, unknown function	0.032746	0.040723	0.017432		0.005248	0.026467	-0.065778	-0.014302	-0.014282
Pf3D7_05_v3	410018	415558	PF3D7_0509800	phosphatidylinositol 4-kinase	-0.006518	-0.007892	-0.002673		-0.045551	0.030514	-0.036799	-0.00096	-0.065501
Pf3D7_05_v3	416115	417559	PF3D7_0509900	conserved protein, unknown function	-0.018633	-0.109502	0.028634		0.018159	-0.032293	0.017021	0.109752	0.082904
Pf3D7_05_v3	417886	421675	PF3D7_0510000	conserved Plasmodium protein, unknown function	0.002751	-0.0198	-0.058299		-0.068194	0.024497	-0.212403	-0.006529	0.003742
Pf3D7_05_v3	422496	430603	PF3D7_0510100	conserved protein, unknown function	0.010078	-0.064177	-0.061913		-0.025126	-0.089489	-0.172273	-0.020614	-0.077724
Pf3D7_05_v3	437245	439988	PF3D7_0510200	peptidyl-prolyl cis-trans isomerase	-0.004456	-0.078179	-0.070642		-0.047877	-0.019118	0.041484	0.047753	-0.005471
Pf3D7_05_v3	440529	442129	PF3D7_0510300	stripes inner membrane complex protein, putative	-0.003797	0.037326	0.029448		-0.02116	0.159901	0.09504	0.049017	0.088147
Pf3D7_05_v3	444010	445781	PF3D7_0510400	PDCD2 domain-containing protein, putative	-0.01082	-0.078689	-0.042453		-0.008447	-0.004882	0.019629	0.032319	0.054669
Pf3D7_05_v3	445782	448752	PF3D7_0510500	topoisomerase I	-0.008432	-0.077197	-0.045019		0.020906	0.028552	-0.110962	0.021286	0.056095
Pf3D7_05_v3	459051	460594	PF3D7_0510700	conserved Plasmodium protein, unknown function	0.031698	0.051275	0.00695		-0.046516	0.021197	-0.038261	0.019939	0.0778
Pf3D7_05_v3	460767	464649	PF3D7_0510800	WD repeat-containing protein, putative	-0.025992	0.063311	0.055262		-0.060848	0.002651	-0.022108	0.040375	-0.02162
Pf3D7_05_v3	467335	468350	PF3D7_0511000	translationally-controlled tumor protein homolog	0.015585	-0.101602	-0.04051		-0.149227	-0.134157	-0.19213	-0.084901	-0.074543
Pf3D7_05_v3	469026	470092	PF3D7_0511100	conserved Plasmodium protein, unknown function	-0.016427	-0.053309	-0.104395		-0.018328	0.121568	-0.019313	0.051253	0.111457
Pf3D7_05_v3	470805	474272	PF3D7_0511200	stearoyl-CoA desaturase	0.012757	-0.057209	0.028824		0.018119	-0.009126	0.002044	0.033547	0.031933
Pf3D7_05_v3	474273	479132	PF3D7_0511300	MORN repeat protein, putative	0.023099	-0.088554	-0.020208		-0.083534	-0.022895	-0.034769	-0.043852	-0.019875
Pf3D7_05_v3	481173	482818	PF3D7_0511400	conserved Plasmodium protein, unknown function	0.029702	0.087292	-0.122823		0.000179	0.022059	-0.01282	0.013278	0.105582
Pf3D7_05_v3	486352	517023	PF3D7_0511500	RNA pseudouridylate synthase, putative	-0.0027	-0.009339	-0.004575		-0.041944	0.00208	-0.022211	0.044166	-0.008804
Pf3D7_05_v3	517024	518135	PF3D7_0511600	apical rhoptry neck protein	-0.061508	0.272216	0.122926		-0.13441	0.006278	-0.069279	-0.06317	-0.056768
Pf3D7_05_v3	518879	520328	PF3D7_0511700	EKC/KEOPS complex subunit CGI121	-0.012189	0.200009	0.148013		-0.031492	-0.024759	-0.083171	0.050166	0.046724
Pf3D7_05_v3	520470	522943	PF3D7_0511800	inositol-3-phosphate synthase	0.003744	-0.072507	-0.090887		-0.025787	0.032062	-0.141683	0.057787	0.094626
Pf3D7_05_v3	524776	527428	PF3D7_0511900	conserved Plasmodium protein, unknown function	0.034017	-0.079167	-0.027267		-0.166873	0.051582	-0.190369	-0.059288	0.017785
Pf3D7_05_v3	527429	528756	PF3D7_0512000	prefoldin subunit 6, putative	-0.009629	-0.025564	0.071683		0.04912	0.195894	-0.264458	0.078544	0.147473
Pf3D7_05_v3	528757	529659	PF3D7_0512100	conserved protein, unknown function	-0.035347	0.094159	0.057752		-0.095878	-0.18493	-0.208034	-0.076743	-0.190256
Pf3D7_05_v3	529684	532151	PF3D7_0512200	glutathione synthetase	-0.024598	0.024338	0.037363		-0.072685	0.007685	-0.139781	-0.005421	-0.044644
Pf3D7_05_v3	533306	534588	PF3D7_0512300	CDK-activating kinase assembly factor MAT1	0.039677	0.0055	0.140766		-0.126442	-0.079432	-0.127853	-0.011461	-0.053794
Pf3D7_05_v3	536023	537227	PF3D7_0512400	conserved Plasmodium protein, unknown function	-0.042722	0.138953	0.169051		0.040037	0.092437	-0.015077	0.107573	0.15952
Pf3D7_05_v3	539481	542843	PF3D7_0512500	conserved Plasmodium protein, unknown function	-0.009097	-0.140046	-0.098977		-0.075915	-0.050955	-0.153865	0.019501	-0.006202
Pf3D7_05_v3	544290	546243	PF3D7_0512600	ras-related protein Rab-1B	-0.003921	0.064963	0.022795		0.055211	-0.059179	-0.123937	0.022799	0.059576
Pf3D7_05_v3	546484	547829	PF3D7_0512700	orotate phosphoribosyltransferase	-0.003926	-0.133486	0.041425		0.086996	0.173415	-0.017454	0.098248	0.116666
Pf3D7_05_v3	548156	553590	PF3D7_0512800	conserved Plasmodium protein, unknown function	7.9e-05	0.02827	0.029369		-0.062014	-0.030459	-0.033914	0.044042	0.034339
Pf3D7_05_v3	553740	555025	PF3D7_0512900	AKAP-like protein	-0.038384	0.082585	-0.031301		0.069155	0.055754	-0.007883	0.027856	0.087088
Pf3D7_05_v3	555026	556323	PF3D7_0513000	conserved protein, unknown function	0.007109	-0.028174	-0.052075		0.058517	0.120767	-0.028398	0.081931	0.136692
Pf3D7_05_v3	556789	558262	PF3D7_0513100	conserved protein, unknown function	-0.002455	0.01765	0.052626		0.041313	0.007521	0.038387	-0.024645	0.050144
Pf3D7_05_v3	559263	568634	PF3D7_0513200	conserved Plasmodium protein, unknown function	-0.001831	-0.047574	-0.059248		0.005307	0.002232	-0.09091	0.04765	0.052547
Pf3D7_05_v3	568932	570169	PF3D7_0513300	purine nucleoside phosphorylase	-0.011405	0.068982	-0.025621		-0.134731	-0.146133	-0.073728	-0.069093	-0.053602
Pf3D7_05_v3	570808	572911	PF3D7_0513400	GTP-binding protein, putative	-0.005157	-0.066597	0.029254		-0.004969	0.041889	-0.105082	0.101457	0.061484
Pf3D7_05_v3	573338	574498	PF3D7_0513500	mitochondrial import inner membrane translocase subunit TIM16, putative	0.01551	0.095563	-0.011726		-0.057687	0.012208	0.019107	0.020577	-0.031105
Pf3D7_05_v3	574691	578755	PF3D7_0513600	deoxyribodipyrimidine photo-lyase, putative	-0.000768	0.001573	-0.014599		-0.041951	0.019813	-0.090433	0.020197	-0.022698
Pf3D7_05_v3	580977	584374	PF3D7_0513700	secreted ookinete protein, putative	0.030049	-0.079779	-0.105959		-0.124916	-0.079764	-0.091868	0.000362	-0.059873
Pf3D7_05_v3	585107	586230	PF3D7_0513800	ras-related protein Rab-1A	0.040131	-0.104931	-0.166107		0.122874	0.116476	-0.068086	-0.043907	0.051499
Pf3D7_05_v3	587502	588799	PF3D7_0513900	conserved protein, unknown function	-0.02084	-0.068427	-0.123108		-0.029692	-0.0784	-0.131622	0.003626	-0.072355
Pf3D7_05_v3	588800	591019	PF3D7_0514000	tubulin--tyrosine ligase, putative	0.00842	0.043725	0.0184		-0.035567	0.008932	-0.014739	0.015222	0.053385
Pf3D7_05_v3	591088	595913	PF3D7_0514100	ATP-dependent DNA helicase UvrD	-0.014017	0.010825	0.018507		-0.025015	-0.038272	-0.05943	-0.010815	-0.045685
Pf3D7_05_v3	596568	599671	PF3D7_0514200	conserved Plasmodium protein, unknown function	-0.002196	0.020609	0.006466		-0.013684	-0.068115	-0.041463	-0.02502	-0.113236
Pf3D7_05_v3	599797	603683	PF3D7_0514300	aspartate--tRNA ligase, putative	-0.022792	0.032909	-0.04249		-0.049169	-0.021005	-0.095473	-0.001392	-0.012269
Pf3D7_05_v3	604777	606580	PF3D7_0514500	conserved Plasmodium membrane protein, unknown function	-0.012345	-0.07842	-0.10255		0.030291	0.074115	-0.106695	0.056977	0.010001
Pf3D7_05_v3	606855	608701	PF3D7_0514600	ribose-5-phosphate isomerase, putative	0.000468	0.054282	-0.012412		-0.108968	-0.154619	-0.097938	0.032369	-0.036238
Pf3D7_05_v3	609839	615021	PF3D7_0514700	MORN repeat protein, putative	0.016198	-0.006453	0.076788		-0.049349	-0.027956	-0.108212	0.052574	-0.001241
Pf3D7_05_v3	615032	618243	PF3D7_0514800	inositol polyphosphate multikinase, putative	-0.002414	-0.090063	-0.139444		0.028827	-0.005129	-0.046435	0.053286	-0.047311
Pf3D7_05_v3	618379	620195	PF3D7_0514900	conserved Plasmodium protein, unknown function	-0.004344	-0.08669	-0.075105		-0.053954	-0.000725	-0.080873	-0.016615	-0.055844
Pf3D7_05_v3	620560	623606	PF3D7_0515000	pre-mRNA-splicing factor CWC2, putative	-0.025025	0.065756	0.102065		0.00487	0.079533	0.030936	0.018686	0.042286
Pf3D7_05_v3	624469	626731	PF3D7_0515100	rhomboid protease ROM9	-0.003126	0.003947	0.16886		0.090494	0.10385	0.028444	0.077877	0.030107
Pf3D7_05_v3	627048	628211	PF3D7_0515200	conserved Plasmodium protein, unknown function	0.022102	-0.165882	-0.100404		0.002666	0.069187	-0.032747	0.119613	0.092116
Pf3D7_05_v3	628731	635632	PF3D7_0515300	phosphatidylinositol 3-kinase	0.014705	0.007923	0.032016		-0.052109	-0.0578	-0.055896	-0.047116	-0.030052
Pf3D7_05_v3	637104	640631	PF3D7_0515400	conserved protein, unknown function	-0.040042	-0.024925	-0.028783		-0.070054	-0.016321	-0.092964	-0.032923	-0.062056
Pf3D7_05_v3	640887	644935	PF3D7_0515500	amino acid transporter, putative	-0.013869	-0.045406	0.042675		0.009035	0.010822	-0.049838	-0.001498	0.01381
Pf3D7_05_v3	646409	652356	PF3D7_0515600	conserved Plasmodium protein, unknown function	-0.001083	0.043793	0.07327		-0.001944	-0.015747	0.016843	-0.011555	0.028489
Pf3D7_05_v3	653716	655586	PF3D7_0515700	glideosome-associated protein 40, putative	-0.005072	0.036917	0.04333		-0.123217	-0.022405	-0.09735	-0.066317	0.000381
Pf3D7_05_v3	658173	658927	PF3D7_0515800	BolA-like protein, putative	-0.009405	0.133186	0.176364		-0.11479	0.007834	0.129091	0.045302	-0.104925
Pf3D7_05_v3	659900	661386	PF3D7_0515900	NLI interacting factor-like phosphatase, putative	-0.010853	-0.053977	-0.08052		0.034532	-0.006597	-0.062752	0.013519	0.000875
Pf3D7_05_v3	663301	667167	PF3D7_0516000	RAP protein, putative	0.007748	0.058824	0.06115		-0.012529	-0.053572	-0.06889	-0.045908	-0.045536
Pf3D7_05_v3	667236	675111	PF3D7_0516100	cation-transporting ATPase 1	0.01933	-0.056888	-0.078554		-0.012596	0.005356	-0.028953	-0.039264	-0.023145
Pf3D7_05_v3	675559	676864	PF3D7_0516200	40S ribosomal protein S11	-0.048238	0.073154	0.02786		-0.109275	-0.043103	0.001393	-0.028508	-0.031236
Pf3D7_05_v3	678660	681192	PF3D7_0516300	tRNA pseudouridine synthase, putative	-0.032348	-0.081075	-0.037401		0.035203	0.036779	-0.077245	0.002268	0.008411
Pf3D7_05_v3	681193	682687	PF3D7_0516400	phosducin-like protein 1, putative	-0.026909	0.065904	0.0736		0.003003	-0.100329	-0.0567	-0.095514	-0.068185
Pf3D7_05_v3	683458	686109	PF3D7_0516500	major facilitator superfamily domain-containing protein, putative	-0.018381	0.124396	0.063368		-0.092481	-0.007548	-0.106716	-0.095205	-0.065631
Pf3D7_05_v3	686560	691892	PF3D7_0516600	sporozoite surface antigen MB2	0.008724	-0.087887	-0.06907		-0.05383	-0.027045	0.000322	-0.002936	-0.043965
Pf3D7_05_v3	694242	699028	PF3D7_0516700	ubiquitin carboxyl-terminal hydrolase 2, putative	-0.008461	-0.002209	-0.032339		0.027511	0.008317	0.024193	0.014617	-0.035117
Pf3D7_05_v3	699870	707506	PF3D7_0516800	AP2 domain transcription factor AP2-O2, putative	-0.006696	0.060896	0.038797		0.010098	0.034126	0.003804	-0.007834	-0.034496
Pf3D7_05_v3	712512	714022	PF3D7_0516900	60S ribosomal protein L2	-0.004399	-0.12043	-0.147051		-0.088115	0.004744	-0.025815	0.002844	-0.021298
Pf3D7_05_v3	715515	716925	PF3D7_0517000	60S ribosomal protein L12, putative	0.022343	-0.110117	-0.009518		-0.005752	-0.037458	0.131573	0.072535	-0.026171
Pf3D7_05_v3	718175	720105	PF3D7_0517100	conserved protein, unknown function	0.015406	-0.006385	-0.065421		0.111321	0.052478	0.122081	0.096204	0.038304
Pf3D7_05_v3	720493	722891	PF3D7_0517200	conserved Plasmodium protein, unknown function	-0.021733	-0.137061	-0.075374		0.051072	0.009607	0.039442	-0.036416	0.02569
Pf3D7_05_v3	724431	726001	PF3D7_0517300	serine/arginine-rich splicing factor 1	0.015319	-0.023418	-0.038935		-0.075478	-0.036376	-0.06546	0.006695	-0.085606
Pf3D7_05_v3	731157	735412	PF3D7_0517400	FACT complex subunit SPT16, putative	0.023345	-0.000961	-0.07682		0.042306	0.10205	0.038139	0.033857	0.047587
Pf3D7_05_v3	735637	738650	PF3D7_0517500	UTP--glucose-1-phosphate uridylyltransferase, putative	0.001468	-0.052088	-0.055648		-0.03347	-0.052049	-0.013576	-0.006977	-0.113621
Pf3D7_05_v3	739906	741284	PF3D7_0517600	F-actin-capping protein subunit beta, putative	0.037191	0.012425	-0.067228		0.030747	0.037216	-0.026867	0.022728	0.046091
Pf3D7_05_v3	742929	745563	PF3D7_0517700	eukaryotic translation initiation factor 3 subunit B, putative	0.00281	-0.091984	0.001627		0.103206	0.110001	0.056835	0.029857	0.084739
Pf3D7_05_v3	745564	746884	PF3D7_0517800	apicortin, putative	-0.013989	-0.057455	-0.039538		-0.062887	-0.089238	-0.048256	-0.071827	-0.133611
Pf3D7_05_v3	747545	749927	PF3D7_0517900	zinc finger protein, putative	0.016942	-0.053338	-0.000755		-0.035677	0.039723	-0.037809	0.011983	0.031434
Pf3D7_05_v3	750411	752685	PF3D7_0518000	NOSIP domain-containing protein, putative	-0.010937	0.099668	0.141952		0.076024	0.028096	0.027814	-0.024072	0.110763
Pf3D7_05_v3	753048	757794	PF3D7_0518100	protein AMR2	-0.000691	-0.014335	0.057054		-0.009288	-0.02926	0.123363	0.021384	-0.032607
Pf3D7_05_v3	758253	759148	PF3D7_0518200	SWIB/MDM2 domain-containing protein	0.006505	0.021251	0.182254		0.041585	-0.065324	0.095348	-0.048648	0.005166
Pf3D7_05_v3	759581	761248	PF3D7_0518300	proteasome subunit beta type-1, putative	-0.001806	0.049083	0.026504		0.024072	-0.00576	0.038622	0.092552	0.030698
Pf3D7_05_v3	761853	763042	PF3D7_0518400	cyclin, putative	0.015748	0.000564	-0.059502		-0.002278	-0.02641	-0.094798	0.097173	-0.089153
Pf3D7_05_v3	763282	767153	PF3D7_0518500	ATP-dependent RNA helicase DDX23, putative	-0.006637	-0.061794	0.036396		-0.033283	-0.050158	-0.06248	-0.038416	-0.036034
Pf3D7_05_v3	769060	773390	PF3D7_0518600	WD repeat-containing protein 26, putative	0.008242	0.033166	0.043674		-0.000718	-0.002413	-0.001179	-0.00881	0.015348
Pf3D7_05_v3	773825	780688	PF3D7_0518700	mRNA-binding protein PUF1	0.000693	0.024821	0.072371		-0.054047	-0.027404	-0.03974	-0.052074	-0.080383
Pf3D7_05_v3	783388	785241	PF3D7_0518800	secreted ookinete protein, putative	0.002822	0.02081	0.049124		-0.039518	0.007793	0.053097	0.021278	0.033862
Pf3D7_05_v3	785414	786815	PF3D7_0518900	conserved protein, unknown function	-0.000795	-0.109466	0.02244		0.056711	0.022745	0.044618	-0.039975	-0.05879
Pf3D7_05_v3	788349	789730	PF3D7_0519000	histone RNA hairpin-binding protein, putative	0.03219	-0.029455	0.095257		-0.080355	0.016235	-0.047118	0.055419	0.012132
Pf3D7_05_v3	790149	791023	PF3D7_0519100	50S ribosomal protein L14, mitochondrial, putative	-0.01149	0.11128	0.170282		-0.04929	0.04035	-0.001302	0.019035	0.145539
Pf3D7_05_v3	791469	793186	PF3D7_0519200	V-type proton ATPase 16 kDa proteolipid subunit	0.040827	-0.192799	-0.04816		0.057244	0.104144	-0.023698	0.07282	0.024581
Pf3D7_05_v3	795277	797723	PF3D7_0519300	protoheme IX farnesyltransferase, putative	-0.003161	0.053967	0.062902		0.030807	0.012257	0.030031	-0.004372	0.069387
Pf3D7_05_v3	797786	799025	PF3D7_0519400	40S ribosomal protein S24	-0.021298	0.229793	0.198157		0.089052	0.050274	0.014152	-0.049418	0.097671
Pf3D7_05_v3	801200	809377	PF3D7_0519500	CCR4 domain-containing protein 1, putative	-0.00141	-0.022184	0.017866		0.029308	0.046257	-0.085331	0.014727	-0.025568
Pf3D7_05_v3	812398	815165	PF3D7_0519600	zinc finger protein, putative	0.001138	0.006007	0.057259		0.019175	0.037045	0.097217	0.096196	0.05716
Pf3D7_05_v3	816816	819389	PF3D7_0519700	FoP domain-containing protein, putative	-0.035711	0.073014	0.154138		0.081047	-0.056089	-0.063904	0.001983	-0.003075
Pf3D7_05_v3	820469	823158	PF3D7_0519800	EELM2 domain-containing protein, putative	0.007044	0.005169	-0.04924		-0.030676	-0.000461	-0.031498	-0.055547	-0.047658
Pf3D7_05_v3	825585	827662	PF3D7_0519900	conserved protein, unknown function	-0.014867	-0.102314	-0.063564		0.008026	0.021508	-0.051315	0.051821	-0.023325
Pf3D7_05_v3	828703	830133	PF3D7_0520000	40S ribosomal protein S9, putative	-0.014478	0.136585	0.081959		0.053327	0.075398	-0.063437	0.040697	0.108676
Pf3D7_05_v3	831367	834593	PF3D7_0520100	protein phosphatase PPM9, putative	-0.001836	0.044629	0.054542		-0.039505	-0.050621	-0.088326	-0.026218	-0.09144
Pf3D7_05_v3	835064	837657	PF3D7_0520200	mediator of RNA polymerase II transcription subunit 17, putative	0.005733	0.019432	-0.003739		0.106086	0.013168	0.115352	0.043864	0.006969
Pf3D7_05_v3	838178	839333	PF3D7_0520300	U6 snRNA-associated Sm-like protein LSm2, putative	-0.012719	0.237397	0.181818		-0.10877	0.083309	-0.067025	-0.053693	0.064185
Pf3D7_05_v3	839405	840810	PF3D7_0520400	single-stranded DNA-binding protein, putative	0.009425	0.0483	0.080232		-0.020029	0.088986	-0.031926	-0.010777	-0.050791
Pf3D7_05_v3	841473	842905	PF3D7_0520500	phosphomethylpyrimidine kinase, putative	-0.012881	-0.093064	-0.072349		0.085514	0.013835	0.017453	0.002002	-0.028387
Pf3D7_05_v3	843336	845067	PF3D7_0520600	bis(5'-nucleosyl)-tetraphosphatase [asymmetrical]	-0.024592	0.055703	0.031327		-0.03566	-0.115442	-0.098421	0.04324	-0.035031
Pf3D7_05_v3	845593	849017	PF3D7_0520700	CDC73 domain-containing protein, putative	0.016664	0.019227	0.011795		-0.047531	-0.034724	-0.003739	0.02305	0.038895
Pf3D7_05_v3	849612	856276	PF3D7_0520800	conserved protein, unknown function	-0.010468	0.105725	0.07948		-0.007325	-0.000358	0.013174	0.00691	-0.022005
Pf3D7_05_v3	856788	858727	PF3D7_0520900	adenosylhomocysteinase	0.003117	0.021315	0.01057		0.004868	0.089284	0.012261	0.03319	0.091424
Pf3D7_05_v3	859123	861313	PF3D7_0521000	conserved Plasmodium protein, unknown function	-0.024495	0.032773	0.021932		-0.028725	0.049153	-0.020574	0.005971	0.052098
Pf3D7_05_v3	861680	867833	PF3D7_0521100	conserved Plasmodium protein, unknown function	0.012079	-0.007851	0.011843		0.029148	0.073753	-0.017334	0.125175	0.039735
Pf3D7_05_v3	868642	870031	PF3D7_0521200	conserved protein, unknown function	-0.00033	-0.245088	-0.120811		0.10486	-0.06148	-0.323616	0.032401	-0.03767
Pf3D7_05_v3	870032	874820	PF3D7_0521300	zinc finger protein, putative	-0.029369	0.105798	0.137987		0.031934	0.11076	-0.12424	0.060935	0.066714
Pf3D7_05_v3	875623	877811	PF3D7_0521400	conserved protein, unknown function	0.000511	-0.139311	-0.047507		0.024795	0.027993	-0.194899	0.026798	0.008796
Pf3D7_05_v3	877818	879913	PF3D7_0521500	ribosomal large subunit pseudouridylate synthase, putative	-0.003699	-0.054458	0.040214		-0.043804	-0.06774	-0.199166	0.021136	-0.056501
Pf3D7_05_v3	882126	885151	PF3D7_0521700	ATP-dependent RNA helicase DDX1, putative	0.00977	0.037201	-0.02591		-0.00166	0.010905	-0.185412	0.073873	-0.010525
Pf3D7_05_v3	885464	888444	PF3D7_0521800	AFG1-like ATPase, putative	0.00206	0.121895	0.176063		-0.009982	0.086014	-0.212037	0.118653	0.066645
Pf3D7_05_v3	888445	895394	PF3D7_0521900	conserved Plasmodium protein, unknown function	-0.027616	0.412417	0.400629		-0.135831	-0.272902	-0.464527	-0.378114	-0.315947
Pf3D7_05_v3	895768	897190	PF3D7_0522000	conserved Plasmodium protein, unknown function	-0.006791	0.59484	0.510475		-0.079291	-0.20565	-0.357836	-0.185504	-0.176985
Pf3D7_05_v3	897215	900006	PF3D7_0522100	conserved Plasmodium protein, unknown function	-0.017816	0.445741	0.423059		-0.21632	-0.346608	-0.467786	-0.356956	-0.407016
Pf3D7_05_v3	901164	902393	PF3D7_0522200	transcription initiation factor TFIID subunit 10, putative	-0.034138	0.610541	0.475804		-0.257296	-0.370886	-0.492783	-0.386484	-0.379746
Pf3D7_05_v3	902394	905094	PF3D7_0522300	18S rRNA (guanine-N(7))-methyltransferase, putative	-0.017729	0.406998	0.404803		-0.236948	-0.372775	-0.426774	-0.350784	-0.394728
Pf3D7_05_v3	907587	936565	PF3D7_0522400	conserved Plasmodium protein, unknown function	-0.019161	0.401486	0.365425		-0.146088	-0.309916	-0.455707	-0.375079	-0.327809
Pf3D7_05_v3	936981	938287	PF3D7_0522500	50S ribosomal protein L17, apicoplast, putative	0.002501	0.495131	0.386727		-0.046053	-0.222372	-0.365231	-0.369697	-0.210368
Pf3D7_05_v3	939999	941950	PF3D7_0522600	inner membrane complex protein	0.015173	0.323226	0.302747		-0.104845	-0.353927	-0.367365	-0.383859	-0.379876
Pf3D7_05_v3	942517	944028	PF3D7_0522700	iron-sulfur assembly protein	0.042061	0.408134	0.300375		-0.120859	-0.271255	-0.322572	-0.25245	-0.296374
Pf3D7_05_v3	944029	945181	PF3D7_0522800	pre-mRNA-splicing factor BUD31, putative	0.003218	0.539395	0.520508		-0.127805	-0.214771	-0.381486	-0.26959	-0.132889
Pf3D7_05_v3	948701	953859	PF3D7_0522900	zinc finger protein, putative	-0.019779	0.384824	0.363583		-0.12226	-0.322941	-0.433456	-0.429467	-0.355477
Pf3D7_05_v3	957640	962399	PF3D7_0523000	multidrug resistance protein 1	-0.006153	0.36499	0.341361		-0.074588	-0.29863	-0.445224	-0.386562	-0.329112
Pf3D7_05_v3	962977	965294	PF3D7_0523100	mitochondrial-processing peptidase subunit alpha, putative	-0.014969	0.333562	0.352		-0.18985	-0.385696	-0.52703	-0.444314	-0.389555
Pf3D7_05_v3	965873	969987	PF3D7_0523200	heptatricopeptide repeat-containing protein, putative	-0.022566	0.401717	0.416788		-0.169058	-0.308391	-0.280342	-0.336927	-0.295304
Pf3D7_05_v3	970016	971212	PF3D7_0523300	cytochrome c oxidase subunit ApiCOX18, putative	-0.00397	0.115888	0.116497		0.033403	0.042173	-0.029406	0.006957	0.047232
Pf3D7_05_v3	973268	976126	PF3D7_0523400	DnaJ protein, putative	0.001302	-0.042014	-0.183574		-0.036516	-0.027907	0.012716	0.01001	0.039559
Pf3D7_05_v3	976440	978065	PF3D7_0523500	dynein light chain Tctex-type, putative	-0.014945	-0.018077	-0.003652		-0.09035	0.027483	0.149106	-0.001309	0.056792
Pf3D7_05_v3	978415	980120	PF3D7_0523600	conserved protein, unknown function	-0.016225	0.143854	0.166143		-0.034408	0.079335	0.073509	0.083755	-0.02139
Pf3D7_05_v3	980504	985604	PF3D7_0523700	conserved Plasmodium membrane protein, unknown function	-0.019759	0.010082	-0.025121		-0.037377	-0.020075	-0.006402	-0.033355	0.015664
Pf3D7_05_v3	989755	992309	PF3D7_0523800	divalent metal transporter, putative	-0.012173	0.031127	-0.010679		0.034844	0.117059	0.086949	0.021095	0.129429
Pf3D7_05_v3	993183	994857	PF3D7_0523900	MerC domain-containing protein, putative	0.021409	0.012071	-0.044323		0.0322	-0.033771	-0.041369	-0.019116	-0.020119
Pf3D7_05_v3	998503	1002374	PF3D7_0524000	karyopherin beta	-0.004067	-0.028524	-0.014964		0.079608	0.064895	0.034491	-0.013232	0.022231
Pf3D7_05_v3	1003987	1008358	PF3D7_0524100	conserved Plasmodium protein, unknown function	-0.012318	-0.068275	-0.111474		0.043431	0.086479	0.085983	0.01692	0.029186
Pf3D7_05_v3	1008386	1009654	PF3D7_0524200	conserved Plasmodium membrane protein, unknown function	0.002427	0.05764	0.133088		0.059977	0.102099	0.205815	0.165665	-0.020234
Pf3D7_05_v3	1010701	1012421	PF3D7_0524300	conserved Plasmodium protein, unknown function	0.014317	0.154252	0.03134		0.010087	0.119936	0.129416	0.042675	0.105608
Pf3D7_05_v3	1013203	1014800	PF3D7_0524400	ribosome-interacting GTPase 1, putative	0.014966	-0.136729	-0.125798		0.046249	-0.049425	-0.018097	0.002868	-0.086429
Pf3D7_05_v3	1017559	1018832	PF3D7_0524600	50S ribosomal protein L12, apicoplast, putative	-0.034679	0.000915	-0.067505		0.110602	0.016058	-0.103546	-0.081058	-0.000311
Pf3D7_05_v3	1019335	1020152	PF3D7_0524700	mitochondrial import receptor subunit TOM22, putative	0.044573	-0.056728	-0.132943		-0.154729	-0.072204	-0.038446	-0.067958	-0.13665
Pf3D7_05_v3	1021158	1024557	PF3D7_0524800	ubiquitin fusion degradation protein 1, putative	0.01171	0.004445	-0.04527		0.031278	-0.025759	0.014401	0.014397	0.030339
Pf3D7_05_v3	1027146	1030612	PF3D7_0524900	S-adenosyl-L-methionine-dependent tRNA 4-demethylwyosine synthase, putative	0.016258	-0.028504	-0.040243		-0.032227	-0.072812	-0.058709	-0.027252	-0.107361
Pf3D7_05_v3	1035979	1038593	PF3D7_0525000	zinc finger protein, putative	-0.009208	0.110696	0.099865		-0.012315	0.055875	0.054852	-0.013229	0.060263
Pf3D7_05_v3	1041495	1044016	PF3D7_0525100	acyl-CoA synthetase	0.024278	0.032968	-0.012448		0.049183	0.092448	-0.027346	0.08441	0.074442
Pf3D7_05_v3	1045212	1051503	PF3D7_0525200	structural maintenance of chromosomes protein 6, putative	0.001362	-0.029462	-0.006493		-0.035589	-0.01872	0.004945	0.007123	-0.018892
Pf3D7_05_v3	1052218	1054163	PF3D7_0525300	conserved protein, unknown function	-0.015759	0.04637	0.002468		-0.00475	-0.091042	0.131433	-3.4e-05	-0.040345
Pf3D7_05_v3	1057401	1059304	PF3D7_0525400	7-helix-1 protein	0.006482	0.055762	0.018375		0.005387	-0.052324	0.061737	0.037871	0.019399
Pf3D7_05_v3	1059668	1065759	PF3D7_0525500	WD repeat-containing protein, putative	0.019025	-0.015172	-0.010682		-0.013076	0.014475	-0.041276	0.023737	-0.000683
Pf3D7_05_v3	1066276	1067962	PF3D7_0525600	RNA methyltransferase, putative	-0.011735	0.026365	0.045276		-0.019369	0.007157	-0.069199	0.006722	-0.06567
Pf3D7_05_v3	1068266	1069535	PF3D7_0525700	conserved protein, unknown function	-0.010756	-0.047823	0.13389		0.02701	-0.079674	-0.018359	-0.047447	-0.001991
Pf3D7_05_v3	1070997	1072399	PF3D7_0525800	inner membrane complex protein 1g, putative	0.015926	0.005081	-0.125704		0.052889	0.042519	-0.057887	0.005423	-0.035964
Pf3D7_05_v3	1073396	1075778	PF3D7_0525900	NIMA related kinase 2	0.004408	0.070253	0.009165		0.007141	0.052001	-0.019104	0.062983	0.115467
Pf3D7_05_v3	1075779	1078583	PF3D7_0526000	RAP protein, putative	-0.007042	-0.135661	-0.11537		0.005101	-0.04756	0.00385	0.086928	-0.089434
Pf3D7_05_v3	1079529	1081258	PF3D7_0526100	conserved Plasmodium membrane protein, unknown function	0.006552	-0.029121	-0.102104		-0.080059	-0.035358	-0.130917	0.089461	-0.048164
Pf3D7_05_v3	1081308	1084066	PF3D7_0526200	ADP-ribosylation factor GTPase-activating protein, putative	-0.002635	0.031048	-0.007917		-0.028066	-0.10025	-0.066981	0.064976	-0.066747
Pf3D7_05_v3	1085373	1086844	PF3D7_0526300	WD repeat-containing protein 55, putative	0.01077	-0.074639	0.023874		-0.058911	0.052697	-0.072228	-0.097347	-0.042587
Pf3D7_05_v3	1088173	1089758	PF3D7_0526400	conserved Plasmodium protein, unknown function	0.001694	-0.047608	-0.034985		0.028131	0.057556	0.031964	0.14869	-0.045524
Pf3D7_05_v3	1090680	1095334	PF3D7_0526500	conserved Plasmodium protein, unknown function	0.008078	0.006237	0.01927		-0.120937	-0.083002	0.052143	-0.030618	-0.101933
Pf3D7_05_v3	1100953	1115027	PF3D7_0526600	conserved Plasmodium protein, unknown function	-0.000906	0.036047	0.076707		0.015177	0.039273	0.055272	-0.00814	0.023699
Pf3D7_05_v3	1117011	1119901	PF3D7_0526700	conserved protein, unknown function	0.019599	0.015291	0.021924		-0.111134	-0.009091	-0.036227	0.009782	-0.058382
Pf3D7_05_v3	1120454	1122060	PF3D7_0526800	conserved Plasmodium protein, unknown function	0.011727	0.033882	-0.072666		0.01615	-0.089815	-0.037388	0.005502	-0.045808
Pf3D7_05_v3	1123360	1124845	PF3D7_0526900	transmembrane emp24 domain-containing protein, putative	-0.009694	0.096934	0.142025		-0.044702	-0.071378	0.021356	0.026899	-0.113657
Pf3D7_05_v3	1124849	1128396	PF3D7_0527000	DNA replication licensing factor MCM3, putative	0.007636	-0.031799	0.010791		0.011645	0.027974	-0.057374	0.018681	0.018269
Pf3D7_05_v3	1129709	1131004	PF3D7_0527100	ubiquitin-conjugating enzyme E2 N, putative	0.003845	0.111033	0.061946		-0.008452	-0.015918	-0.003095	-0.059876	0.017475
Pf3D7_05_v3	1132687	1135104	PF3D7_0527200	ubiquitin carboxyl-terminal hydrolase 14	0.023902	0.01118	-0.020485		0.01304	0.03858	-0.003164	0.064457	0.023401
Pf3D7_05_v3	1135726	1138120	PF3D7_0527300	methionine aminopeptidase 1a, putative	0.009847	-0.003296	0.020592		0.031511	0.036833	0.058105	0.040106	0.041506
Pf3D7_05_v3	1140377	1141404	PF3D7_0527400	conserved Plasmodium protein, unknown function	0.034341	-0.027256	-0.159161		0.119201	0.016406	0.037718	0.016052	0.031211
Pf3D7_05_v3	1143368	1145608	PF3D7_0527500	Hsc70-interacting protein	0.005734	-0.114979	-0.016028		0.025216	0.060907	-0.136543	0.122498	-0.037517
Pf3D7_05_v3	1145609	1149060	PF3D7_0527600	conserved Plasmodium protein, unknown function	0.005017	-0.053733	-0.018565		0.099189	0.13029	-0.049178	0.146378	0.028507
Pf3D7_05_v3	1153426	1155923	PF3D7_0527900	ATP-dependent RNA helicase DDX41, putative	-0.004812	0.001067	-0.017445		-0.087795	0.023828	0.019273	-0.010438	0.012092
Pf3D7_05_v3	1157590	1161803	PF3D7_0528100	AP-1 complex subunit beta, putative	0.005645	-0.038908	-0.020232		0.087486	0.11118	-0.04854	0.016548	0.066025
Pf3D7_05_v3	1163158	1165322	PF3D7_0528200	eukaryotic translation initiation factor 3 subunit E, putative	0.002311	-0.033502	-0.028841		-0.013659	0.015318	-0.068277	-0.000798	0.068218
Pf3D7_05_v3	1166270	1168260	PF3D7_0528300	conserved protein, unknown function	-0.031235	0.028063	0.00366		-0.001351	-0.018119	-0.013185	0.034274	-0.048081
Pf3D7_05_v3	1171409	1174140	PF3D7_0528400	palmitoyltransferase DHHC7	-0.014936	0.048852	0.001672		0.11247	0.152488	0.102894	0.069314	0.088192
Pf3D7_05_v3	1174657	1177536	PF3D7_0528500	F-actin-capping protein subunit alpha, putative	0.017307	-0.052652	0.029417		0.059703	0.045319	0.029147	0.064398	0.047672
Pf3D7_05_v3	1178026	1179140	PF3D7_0528700	peptidyl-prolyl cis-trans isomerase	0.020491	-0.029378	-0.086366		-0.089566	-0.175531	0.00517	-0.036607	-0.1292
Pf3D7_05_v3	1180175	1182288	PF3D7_0528800	nucleolar preribosomal GTPase, putative	-0.017689	0.077643	0.103764		0.010155	-0.019742	0.018283	-0.034358	0.043234
Pf3D7_05_v3	1183666	1185889	PF3D7_0528900	conserved protein, unknown function	0.002499	0.071947	0.034165		0.111716	0.089669	0.015086	0.146165	0.113054
Pf3D7_05_v3	1186537	1189196	PF3D7_0529000	conserved Plasmodium protein, unknown function	0.025246	-0.043222	-0.016906		0.021361	0.001151	0.013154	-0.020201	-0.009222
Pf3D7_05_v3	1190750	1191932	PF3D7_0529100	thioredoxin-like protein, putative	-0.012094	-0.018088	-0.051283		0.17721	0.098903	0.17876	0.120189	0.11358
Pf3D7_05_v3	1192723	1195582	PF3D7_0529200	sugar transporter, putative	-0.000561	-0.017349	0.033201		0.037339	0.010359	-0.012186	0.00764	-0.007942
Pf3D7_05_v3	1196065	1197639	PF3D7_0529300	apicoplast TIC22 protein	-0.015836	0.06923	0.186651		0.063142	-0.027933	0.051244	-0.01216	-0.083901
Pf3D7_05_v3	1198915	1205437	PF3D7_0529400	conserved Plasmodium protein, unknown function	-0.013629	0.031038	0.04635		0.020339	0.068843	-0.003357	0.041848	-0.0133
Pf3D7_05_v3	1206223	1207929	PF3D7_0529500	cell cycle regulator protein, putative	0.010784	0.046221	-0.016624		-0.072813	-0.017846	0.054859	0.124638	-0.013215
Pf3D7_05_v3	1208756	1212352	PF3D7_0529700	heptatricopeptide repeat-containing protein, putative	-0.000667	0.121571	0.027042		0.02675	0.099653	-0.0975	0.039774	0.0339
Pf3D7_05_v3	1213283	1219626	PF3D7_0529800	conserved Plasmodium protein, unknown function	0.020749	0.027622	-0.010753		0.035204	0.043289	-0.03701	0.045491	-0.000657
Pf3D7_05_v3	1220527	1222242	PF3D7_0529900	RING zinc finger protein, putative	-0.001485	0.011156	0.062565		0.021723	0.070764	-0.048763	0.037572	-0.059757
Pf3D7_05_v3	1224348	1225141	PF3D7_0530000	conserved Plasmodium protein, unknown function	-0.025173	-0.064082	0.053308		0.006321	0.044357	-0.046837	0.099902	0.132999
Pf3D7_05_v3	1226633	1228007	PF3D7_0530100	SNARE protein, putative	0.024016	-0.079501	0.066307		-0.00799	0.038234	-0.074934	-0.06267	-0.013549
Pf3D7_05_v3	1228827	1230901	PF3D7_0530200	phosphoenolpyruvate/phosphate translocator	-0.008653	-0.111617	-0.102934		0.059277	0.08595	0.022208	0.083522	0.011535
Pf3D7_05_v3	1233151	1238336	PF3D7_0530300	conserved Plasmodium membrane protein, unknown function	-0.013362	0.060705	0.006319		0.018948	0.106336	0.048999	0.101512	0.094021
Pf3D7_05_v3	1238383	1244237	PF3D7_0530400	conserved Plasmodium protein, unknown function	0.005818	0.065147	0.006625		0.007234	0.047104	0.071101	0.134406	0.029983
Pf3D7_05_v3	1244501	1248363	PF3D7_0530500	conserved Plasmodium membrane protein, unknown function	0.003465	-0.001601	-0.039042		0.002761	0.031374	0.021037	0.078773	0.010869
Pf3D7_05_v3	1248364	1250211	PF3D7_0530600	XAP-5 DNA binding protein, putative	-0.05345	0.099777	0.093685		0.020459	0.041778	0.077158	0.055705	0.139963
Pf3D7_05_v3	1250487	1254440	PF3D7_0530700	conserved Plasmodium protein, unknown function	-0.022954	0.01495	0.029185		-0.020807	0.034594	-0.076249	0.033064	0.061276
Pf3D7_05_v3	1254971	1257488	PF3D7_0530800	CPW-WPC family protein	-0.017525	0.071873	0.164382		-0.013142	0.064739	0.067859	0.059789	0.004566
Pf3D7_05_v3	1257489	1266000	PF3D7_0530900	formin 1	0.01162	0.02188	0.028976		0.090158	0.134251	-0.056979	0.060388	0.088118
Pf3D7_05_v3	1267160	1269789	PF3D7_0531000	SURF1 domain-containing protein, putative	0.003177	-0.046663	0.049235		0.063239	0.092461	-0.002773	0.054112	-0.002038
Pf3D7_05_v3	1270138	1278734	PF3D7_0531100	conserved Plasmodium protein, unknown function	0.013783	0.00457	-0.026445		0.027005	0.032436	-0.053738	-0.040978	-0.031985
Pf3D7_05_v3	1279708	1280849	PF3D7_0531200	ribosomal protein S16, mitochondrial, putative	-0.016845	0.124886	0.178997		0.025494	0.120477	-0.019329	0.034818	0.066645
Pf3D7_05_v3	1281039	1282422	PF3D7_0531300	conserved Plasmodium protein, unknown function	0.012937	0.026778	0.051526		-0.020164	0.074423	0.030246	0.061322	0.040502
Pf3D7_05_v3	1282423	1286356	PF3D7_0531400	conserved Plasmodium protein, unknown function	-0.013195	0.071639	0.104957		-0.011486	-0.024238	-0.010893	-0.02451	-0.035767
Pf3D7_05_v3	1289455	1291692	PF3D7_0531600	18S ribosomal RNA	0.044512	-0.049598	-0.027976		-0.213396	-0.256761	-0.119258	-0.042022	-0.21846
Pf3D7_05_v3	1292410	1296449	PF3D7_0532000	28S ribosomal RNA	0.053012	-0.210413	-0.085085		-0.140639	-0.223722	-0.204986	0.057068	-0.215982
Pf3D7_05_v3	1300974	1302019	PF3D7_0532100	early transcribed membrane protein 5	0.006137	-0.149848	-0.113958		0.042839	-0.072691	0.139262	0.168803	-0.008881
Pf3D7_05_v3	1303412	1304776	PF3D7_0532200	Plasmodium exported protein (PHISTc), unknown function	0.001284	-0.054742	-0.008263		0.071241	0.105958	0.173626	0.143169	0.124241
Pf3D7_05_v3	1308028	1310190	PF3D7_0532300	Plasmodium exported protein (PHISTb), unknown function	0.017942	0.039559	0.028408		-0.003593	-0.046492	0.031101	-0.066504	-0.059639
Pf3D7_05_v3	1312221	1314404	PF3D7_0532400	lysine-rich membrane-associated PHISTb protein	0.021923	-0.040308	-0.129104		0.053269	0.010761	0.012234	-0.033783	0.079179
Pf3D7_05_v3	1318281	1319479	PF3D7_0532600	Plasmodium exported protein, unknown function	0.052424	0.052281	0.022233		-0.082933	-0.167127	0.098477	-0.006252	-0.042342
Pf3D7_06_v3	77940	79034	PF3D7_0601900	conserved Plasmodium protein, unknown function	0.034933	0.010076	0.097705		-0.014528	0.039439	0.041783	-0.086557	0.048377
Pf3D7_06_v3	82359	87172	PF3D7_0602000	zinc finger protein, putative	-0.021491	0.045365	-0.025818		-0.041326	-0.036173	0.053948	-0.038476	-0.038699
Pf3D7_06_v3	92256	96918	PF3D7_0602100	ATP-dependent RNA helicase, putative	-0.020076	0.062242	-0.001597		-0.013086	-0.000644	0.109748	0.009234	0.041093
Pf3D7_06_v3	97640	99201	PF3D7_0602200	MYND-type zinc finger protein, putative	-0.00422	-0.050226	-0.025504		-0.014182	0.051827	0.056102	-0.001878	0.093397
Pf3D7_06_v3	99531	100975	PF3D7_0602300	liver merozoite formation protein, putative	0.023894	7.7e-05	-0.076271		-0.121527	-0.118627	-0.014251	0.012495	-0.072869
Pf3D7_06_v3	101135	104811	PF3D7_0602400	elongation factor G	0.002869	0.072263	0.082067		-0.02833	-0.031573	0.006507	-0.07438	0.022562
Pf3D7_06_v3	105253	106839	PF3D7_0602500	geranylgeranyl transferase type-2 subunit beta, putative	-0.017372	0.051869	-0.058429		-0.035201	0.00188	-0.019121	-0.010996	-0.088173
Pf3D7_06_v3	106840	111914	PF3D7_0602600	SAC3 domain-containing protein, putative	0.011415	0.07684	0.027918		-0.034795	-0.018546	-0.057678	-0.030108	-0.105778
Pf3D7_06_v3	113574	115474	PF3D7_0602700	conserved Plasmodium protein, unknown function	-0.027554	0.108576	0.172232		0.031141	-0.027273	0.009744	-0.02394	-0.01284
Pf3D7_06_v3	115834	118274	PF3D7_0602800	JmjC domain-containing protein, putative	-0.011038	0.023461	-0.053086		0.07043	0.009074	0.155072	-0.079876	0.060312
Pf3D7_06_v3	118388	120453	PF3D7_0602900	conserved Plasmodium protein, unknown function	0.017568	0.023695	-0.03475		-0.065384	-0.162359	0.043259	-0.064081	-0.0779
Pf3D7_06_v3	122384	124662	PF3D7_0603000	conserved Plasmodium protein, unknown function	0.007714	-0.003481	-0.066702		-0.049932	-0.104143	-0.068473	-0.000784	-0.021582
Pf3D7_06_v3	125208	127066	PF3D7_0603100	RNA-binding protein, putative	-0.001179	-0.013208	0.089572		-0.079223	-0.031807	0.058885	-0.062695	-0.106121
Pf3D7_06_v3	128371	130182	PF3D7_0603200	mitochondrial chaperone BCS1, putative	0.006976	-0.006609	-0.008994		-0.106783	-0.116738	-0.072197	-0.127222	-0.095039
Pf3D7_06_v3	130183	132288	PF3D7_0603300	dihydroorotate dehydrogenase	0.002814	-0.038356	-0.040899		-0.180472	-0.116574	-0.044389	-0.08217	-0.096445
Pf3D7_06_v3	132900	136711	PF3D7_0603400	trophozoite exported protein 1	-0.009966	-0.007413	-0.061223		-0.077927	-0.046301	-0.116883	-0.126501	-0.072402
Pf3D7_06_v3	138943	140768	PF3D7_0603500	cation/H+ antiporter	0.003625	-0.003604	-0.052769		-0.033908	0.019532	-0.018719	-0.03784	0.060733
Pf3D7_06_v3	141168	149193	PF3D7_0603600	conserved Plasmodium protein, unknown function	-0.005693	0.123035	0.11512		-0.009716	0.003474	-0.006463	0.008222	0.02289
Pf3D7_06_v3	150805	152463	PF3D7_0603700	phenylalanine--tRNA ligase	0.008488	0.02787	0.058066		0.021024	-0.02907	-0.018271	-0.017351	0.032306
Pf3D7_06_v3	152464	160705	PF3D7_0603800	centrosomal protein CEP76, putative	-0.00628	0.135087	0.145804		-0.047993	-0.021363	-0.024811	-0.037704	0.010314
Pf3D7_06_v3	161004	162631	PF3D7_0603900	conserved Plasmodium protein, unknown function	-0.046107	0.167708	0.003533		-0.003903	-0.004164	-0.166841	-0.028006	-0.038823
Pf3D7_06_v3	163578	170110	PF3D7_0604000	conserved Plasmodium protein, unknown function	-0.00912	-0.008039	-0.047587		-0.072044	-0.036458	-0.127706	0.005205	-0.005647
Pf3D7_06_v3	171051	177490	PF3D7_0604100	AP2 domain transcription factor	-0.01043	0.006021	-0.027661		-0.014349	-0.046883	-0.089305	-0.017808	0.010595
Pf3D7_06_v3	180686	181731	PF3D7_0604200	mitochondrial ribosomal protein L41, putative	-0.001399	0.096237	-0.030401		-0.040782	-0.08872	-0.109787	-0.031638	0.027579
Pf3D7_06_v3	181966	184714	PF3D7_0604300	conserved Plasmodium protein, unknown function	0.001435	-0.03189	-0.071203		-0.070339	-0.091682	-0.00986	-0.006384	0.07035
Pf3D7_06_v3	184715	186093	PF3D7_0604400	conserved protein, unknown function	-0.009485	-0.031215	-0.084222		-0.010942	-0.017001	-0.119639	-0.046561	0.139459
Pf3D7_06_v3	188762	198328	PF3D7_0604500	conserved Plasmodium protein, unknown function	-0.010987	0.018423	-0.00325		-0.032003	-0.009428	-0.093923	-0.051037	0.011588
Pf3D7_06_v3	198612	204497	PF3D7_0604600	DNA helicase, putative	-0.00792	-0.056965	0.027157		0.005942	-0.021214	-0.034166	-0.018182	0.078789
Pf3D7_06_v3	204498	206457	PF3D7_0604700	glyoxalase I-like protein GILP	0.029402	0.000663	-0.02279		-0.002495	0.066843	0.002776	0.037252	0.082882
Pf3D7_06_v3	206605	211409	PF3D7_0604800	RAP protein, putative	0.002008	-0.043015	-0.065003		0.064855	0.051233	-0.061665	0.070043	0.040048
Pf3D7_06_v3	212165	213282	PF3D7_0604900	conserved Plasmodium protein, unknown function	-0.051038	-0.026555	0.009627		0.21455	0.175311	0.055632	0.233683	0.211049
Pf3D7_06_v3	213308	214392	PF3D7_0605000	50S ribosomal protein L24, putative	-0.011719	0.151534	0.142007		-0.012929	-0.084843	0.007998	-0.090902	0.036446
Pf3D7_06_v3	216990	219757	PF3D7_0605100	RNA-binding protein, putative	-0.005123	-0.089967	-0.064869		0.007036	-0.001966	-0.032545	-0.005192	-0.0127
Pf3D7_06_v3	220157	222063	PF3D7_0605200	conserved protein, unknown function	0.018758	0.087849	0.060429		-0.014312	0.025236	-0.002836	0.043269	0.057057
Pf3D7_06_v3	222489	224450	PF3D7_0605300	serine/threonine protein kinase	-0.027568	-0.056722	-0.069516		0.086175	0.04664	-0.042228	0.033385	0.10543
Pf3D7_06_v3	225221	227696	PF3D7_0605500	cyclin dependent kinase binding protein, putative	-0.003365	0.046428	0.038091		-0.092577	-0.070079	-0.010832	0.027119	-0.050431
Pf3D7_06_v3	227882	235085	PF3D7_0605600	nucleoside diphosphate kinase, putative	-0.011094	0.006202	-0.025876		0.004406	0.015594	0.017299	0.051433	0.061544
Pf3D7_06_v3	236147	237501	PF3D7_0605700	conserved Plasmodium protein, unknown function	0.013004	-0.086604	-0.019248		0.019404	0.019048	0.040889	0.075209	-0.052447
Pf3D7_06_v3	237561	244771	PF3D7_0605800	DNA repair protein RAD50, putative	0.000409	-0.056927	-0.035631		0.000527	0.004727	0.033682	0.002806	0.024748
Pf3D7_06_v3	247390	249416	PF3D7_0605900	long chain polyunsaturated fatty acid elongation enzyme, putative	0.03269	0.025327	0.046229		-0.005683	0.030089	-0.018016	0.032665	0.027282
Pf3D7_06_v3	250362	254053	PF3D7_0606000	conserved Plasmodium protein, unknown function	0.012444	-0.015061	-0.009923		-0.029161	0.072165	0.000116	0.047699	-0.014347
Pf3D7_06_v3	257354	260224	PF3D7_0606100	RNA-binding protein, putative	-0.002186	0.104937	0.074955		-0.115406	-0.045455	-0.047838	-0.03519	-0.01907
Pf3D7_06_v3	260781	262195	PF3D7_0606200	ubiquitin-conjugating enzyme E2 PEX4, putative	0.01898	0.135243	0.152886		-0.024899	-0.001973	-0.018738	0.042975	0.012141
Pf3D7_06_v3	265589	268649	PF3D7_0606500	polypyrimidine tract-binding protein, putative	-0.014799	-0.111807	-0.12052		-0.081852	0.014627	-0.097581	-0.007748	-0.045185
Pf3D7_06_v3	270082	278012	PF3D7_0606600	conserved Plasmodium protein, unknown function	-0.011992	0.048802	0.070854		-0.047636	0.050878	-0.028601	0.019624	-0.023438
Pf3D7_06_v3	281799	287267	PF3D7_0606700	coatomer alpha subunit, putative	-0.007852	-0.009269	-0.030074		0.025556	0.058569	-0.042509	0.03366	0.060251
Pf3D7_06_v3	288127	289526	PF3D7_0606800	VFT protein	0.014341	-0.14925	-0.168044		0.085731	-0.013908	-0.05154	0.040267	0.0536
Pf3D7_06_v3	290176	291335	PF3D7_0606900	glutaredoxin-like protein	-0.021427	0.062358	0.037531		-0.060219	0.01256	0.016175	0.025699	0.039909
Pf3D7_06_v3	293614	297047	PF3D7_0607000	translation initiation factor IF-2, putative	0.021535	-0.074855	-0.067125		0.042831	0.066183	-0.025822	0.014584	0.089999
Pf3D7_06_v3	297691	301447	PF3D7_0607100	MYND-type zinc finger protein, putative	-0.009538	0.011052	0.075401		0.111702	0.16426	0.082907	0.083223	0.101842
Pf3D7_06_v3	301624	303540	PF3D7_0607200	RING zinc finger protein, putative	-0.003033	0.073726	0.003592		-0.010668	0.01796	0.040271	0.070218	-0.030864
Pf3D7_06_v3	304388	306213	PF3D7_0607300	uroporphyrinogen III decarboxylase	0.007825	-0.051227	-0.000221		0.06599	0.010783	0.133369	0.093223	0.107076
Pf3D7_06_v3	306214	310211	PF3D7_0607400	G-protein associated signal transduction protein, putative	-0.011074	-0.104727	-0.001305		0.015097	0.014667	0.009	0.012182	0.06871
Pf3D7_06_v3	311300	313365	PF3D7_0607500	4-hydroxybenzoate polyprenyltransferase, putative	0.001003	-0.126292	-0.104988		0.028929	-0.05739	-0.1176	-0.011792	-0.007814
Pf3D7_06_v3	313606	317132	PF3D7_0607600	spindle assembly abnormal protein 6, putative	-0.018167	0.048843	0.054093		-0.071861	-0.125746	-0.084464	-0.050358	-0.039602
Pf3D7_06_v3	320490	329248	PF3D7_0607700	conserved Plasmodium protein, unknown function	-0.011066	0.074277	0.060633		-0.050727	-0.02403	-0.080611	-0.000393	-0.016678
Pf3D7_06_v3	329287	331975	PF3D7_0607800	GTP-binding protein, putative	0.003643	0.005312	-0.033395		-0.044011	-0.030899	-0.051485	0.032908	-0.072938
Pf3D7_06_v3	332093	335020	PF3D7_0607900	conserved Plasmodium protein, unknown function	-0.010514	0.1091	0.096473		-0.11013	-0.046928	-0.078569	0.051721	0.011277
Pf3D7_06_v3	335021	337580	PF3D7_0608000	diphthine methyltransferase, putative	-0.003897	0.119231	0.091667		-0.04187	0.012472	0.016371	0.095378	0.069325
Pf3D7_06_v3	337581	341817	PF3D7_0608100	conserved Plasmodium protein, unknown function	-0.004861	0.006561	0.059098		-0.026016	0.024091	-0.081765	-0.00057	0.073419
Pf3D7_06_v3	341818	343016	PF3D7_0608200	conserved Plasmodium protein, unknown function	-0.026544	0.20327	0.177655		0.095715	0.120265	-0.018376	0.129077	0.079698
Pf3D7_06_v3	343017	347757	PF3D7_0608300	heptatricopeptide repeat-containing protein, putative	0.004289	0.06898	0.029751		-0.002829	-0.020157	-0.052517	-0.084068	0.052714
Pf3D7_06_v3	347760	349621	PF3D7_0608310	sorting assembly machinery 50 kDa subunit, putative	-0.005155	-0.045311	0.018635		0.016735	0.023352	-0.056923	0.054531	0.043496
Pf3D7_06_v3	349696	350765	PF3D7_0608400	conserved Plasmodium protein, unknown function	-0.026846	-0.058003	-0.12654		-0.047829	-0.1078	-0.116214	-0.023701	-0.079397
Pf3D7_06_v3	351530	353025	PF3D7_0608500	proteasome subunit alpha type-2, putative	-0.025891	0.116407	0.135417		-0.002873	0.044954	0.026518	-0.000281	0.034162
Pf3D7_06_v3	354979	356526	PF3D7_0608600	conserved Plasmodium protein, unknown function	-0.026912	-0.077612	-0.105819		-0.005523	0.010832	-0.106199	-0.02316	0.106936
Pf3D7_06_v3	358141	360453	PF3D7_0608700	T-complex protein 1 subunit zeta	-0.0038	-0.119535	-0.082633		0.07329	0.050837	0.032383	0.053405	0.073259
Pf3D7_06_v3	362385	364129	PF3D7_0608800	ornithine aminotransferase	-0.008337	-0.047178	-0.016454		-0.040866	0.04026	-0.019619	0.021498	0.092534
Pf3D7_06_v3	365037	368709	PF3D7_0608900	conserved Plasmodium protein, unknown function	-0.003106	0.01464	-0.062332		-0.082253	-0.065779	-0.111446	-0.043009	-0.102744
Pf3D7_06_v3	370011	388704	PF3D7_0609000	nucleoporin NUP637, putative	-0.005281	0.003632	0.007817		-0.0387	-0.030605	-0.017466	-0.00567	0.006444
Pf3D7_06_v3	388705	390998	PF3D7_0609100	zinc transporter ZIP1, putative	-0.01923	0.136738	0.092448		-0.09575	0.047366	-0.048231	-0.035702	0.018206
Pf3D7_06_v3	392741	394861	PF3D7_0609200	citrate synthase-like protein, putative	0.02533	0.018771	-0.076589		-0.009048	0.089113	-0.14593	0.050545	0.024368
Pf3D7_06_v3	395992	399539	PF3D7_0609300	conserved Plasmodium protein, unknown function	0.005127	-0.044954	-0.056207		0.004337	0.042864	-0.019668	0.04013	0.006069
Pf3D7_06_v3	399563	401874	PF3D7_0609400	mitochondrial cardiolipin synthase, putative	-0.000917	-0.093134	0.081841		0.037429	-0.010399	-0.009831	0.026292	-0.060135
Pf3D7_06_v3	402472	407492	PF3D7_0609500	conserved Plasmodium protein, unknown function	0.004903	-0.039746	-0.018733		-0.002721	0.093458	-0.054745	0.001436	0.085943
Pf3D7_06_v3	407791	412252	PF3D7_0609600	conserved Plasmodium protein, unknown function	-0.018109	-0.046362	0.0083		-0.039658	0.022242	-0.040751	-0.001507	0.057965
Pf3D7_06_v3	413402	420031	PF3D7_0609700	conserved Plasmodium protein, unknown function	0.001835	-0.024467	0.026182		-0.042229	0.019837	0.006814	-0.003831	0.020604
Pf3D7_06_v3	420907	422872	PF3D7_0609800	palmitoyltransferase DHHC2, putative	-0.01809	-0.015746	0.034158		0.034356	0.092779	-0.020473	0.000574	0.136306
Pf3D7_06_v3	425555	432108	PF3D7_0609900	conserved Plasmodium protein, unknown function	0.014117	0.020047	0.021151		-0.068255	-0.022633	0.007621	0.048789	-0.008359
Pf3D7_06_v3	432758	434428	PF3D7_0610000	mitochondrial ribosomal protein L19 precursor, putative	-0.006776	-0.083922	-0.058878		-0.082451	-0.086963	-0.003253	-0.065016	-0.063955
Pf3D7_06_v3	434557	436715	PF3D7_0610100	pre-mRNA-splicing factor SLU7, putative	-0.039704	0.117098	0.112918		0.020891	0.066325	-0.002513	-0.035782	0.03748
Pf3D7_06_v3	437413	440795	PF3D7_0610200	RNA-binding protein 25, putative	-0.008191	-0.139722	-0.120839		0.001207	0.104695	-0.093584	0.080595	0.01604
Pf3D7_06_v3	444497	445407	PF3D7_0610400	histone H3	0.027793	-0.072229	0.014691		-0.018247	-0.091306	-0.132358	0.012717	-0.092123
Pf3D7_06_v3	445511	446613	PF3D7_0610500	peptidyl-tRNA hydrolase PTRHD1, putative	0.00457	0.030847	-0.075888		-0.081074	-0.120377	0.017867	-0.001133	-0.086166
Pf3D7_06_v3	449041	451711	PF3D7_0610600	calcium-dependent protein kinase 2	-0.001888	-0.100045	0.017878		-0.002078	-0.015587	0.027129	0.010241	-0.008076
Pf3D7_06_v3	453559	455939	PF3D7_0610800	transketolase	0.008853	-0.103314	-0.041064		0.018289	0.0218	0.00769	0.018257	0.030041
Pf3D7_06_v3	456497	460839	PF3D7_0610900	transcription elongation factor SPT5, putative	0.017433	-0.074018	-0.06343		0.014269	0.039956	0.03004	-0.026004	0.052512
Pf3D7_06_v3	463314	464926	PF3D7_0611000	SNARE associated Golgi protein, putative	-0.016036	0.108051	0.068688		0.002923	0.009437	-0.022212	0.020723	-0.010368
Pf3D7_06_v3	465948	466699	PF3D7_0611100	succinate dehydrogenase subunit 3, putative	0.028263	-0.073413	-0.012693		0.10249	-0.002731	-0.042266	-0.023288	0.125643
Pf3D7_06_v3	467231	468892	PF3D7_0611200	AP2 domain transcription factor, putative	-0.047583	-0.100105	0.068789		0.056316	-0.031535	-0.077847	0.057909	0.02747
Pf3D7_06_v3	469799	471441	PF3D7_0611300	ATP synthase-associated protein, putative	0.015116	0.001007	0.039038		-0.010913	0.10087	0.12527	0.119586	-0.011972
Pf3D7_06_v3	471442	474400	PF3D7_0611400	SWIB/MDM2 domain-containing protein	0.001181	-0.08255	-0.032223		0.02416	0.048627	-0.029785	0.031225	0.06262
Pf3D7_06_v3	482575	484157	PF3D7_0611500	conserved protein, unknown function	0.006685	-0.131635	-0.122954		0.079275	0.00235	0.054407	0.014364	-0.002729
Pf3D7_06_v3	484864	487316	PF3D7_0611600	basal complex transmembrane protein 1	0.044944	-0.167061	-0.09075		-0.038481	0.030255	-0.039556	-0.064426	0.033895
Pf3D7_06_v3	490608	501390	PF3D7_0611800	conserved Plasmodium protein, unknown function	0.010372	0.019757	0.008171		-0.038802	0.032769	-0.057014	-0.006794	0.037383
Pf3D7_06_v3	506130	507438	PF3D7_0611900	lsm12, putative	0.018456	-0.044639	0.03365		0.055378	0.120207	0.071387	0.036027	0.148569
Pf3D7_06_v3	507439	508536	PF3D7_0612000	conserved Plasmodium protein, unknown function	0.031583	0.043244	-0.052004		-0.135031	-0.012108	-0.139459	0.051293	0.10003
Pf3D7_06_v3	508910	511380	PF3D7_0612100	eukaryotic translation initiation factor 3 subunit L, putative	0.017762	-0.128839	-0.131358		-0.053383	-0.02998	-0.205885	-0.03415	-0.03488
Pf3D7_06_v3	512722	519798	PF3D7_0612200	leucine-rich repeat protein	-0.005935	-0.030905	-0.052679		0.028403	-0.025264	0.008478	-0.014278	0.012803
Pf3D7_06_v3	521168	522119	PF3D7_0612400	conserved Plasmodium protein, unknown function	-0.039869	0.154901	0.149903		-0.116618	-0.161358	-0.139216	-0.073465	-0.171475
Pf3D7_06_v3	523407	525355	PF3D7_0612600	cytoplasmic tRNA 2-thiolation protein 1, putative	0.033829	-0.141405	-0.063515		0.00842	-0.128852	-0.072452	-0.074582	-0.095335
Pf3D7_06_v3	525737	527280	PF3D7_0612700	6-cysteine protein P12	0.019514	-0.075918	-0.127278		0.079559	-0.012549	0.018606	-0.025623	0.015523
Pf3D7_06_v3	527810	529425	PF3D7_0612800	6-cysteine protein	0.04352	-0.140522	-0.139042		0.026765	-0.084623	-0.08057	0.006069	-0.079816
Pf3D7_06_v3	530876	533436	PF3D7_0612900	nucleolar GTP-binding protein 1, putative	0.015951	-0.098223	-0.005526		0.008099	-0.016422	-0.012789	-0.001428	-0.00539
Pf3D7_06_v3	533657	535614	PF3D7_0613000	conserved Plasmodium protein, unknown function	0.011188	-0.010531	0.021144		0.064529	0.100894	-0.012025	0.141442	0.070077
Pf3D7_06_v3	537528	538835	PF3D7_0613100	conserved Plasmodium protein, unknown function	0.012547	-0.00678	-0.129879		0.055231	-0.097817	0.018386	-0.001749	-0.144102
Pf3D7_06_v3	539054	539875	PF3D7_0613200	conserved Plasmodium protein, unknown function	-0.007437	-0.012065	0.057493		0.030615	-0.006308	-0.1369	-0.053498	-0.134546
Pf3D7_06_v3	539876	545048	PF3D7_0613300	rhoptry protein ROP14	0.013799	-0.046811	-0.014158		-0.01238	-0.025394	-0.039909	-0.001062	0.03242
Pf3D7_06_v3	546714	547991	PF3D7_0613400	50S ribosomal protein L18, apicoplast, putative	-0.020048	-0.078315	-0.018936		0.102725	0.017339	0.006417	0.035771	0.102596
Pf3D7_06_v3	548030	552621	PF3D7_0613500	AP-3 complex subunit beta, putative	0.01608	-0.103552	-0.068951		-0.033728	-0.053729	-0.046548	-0.027968	-0.080646
Pf3D7_06_v3	554207	558478	PF3D7_0613600	conserved Plasmodium protein, unknown function	0.010076	-0.06134	-0.011414		0.02776	-0.072908	-0.012741	-0.004629	-0.062938
Pf3D7_06_v3	559099	561710	PF3D7_0613700	syntaxin-binding protein, putative	0.008803	-0.058488	-0.019945		0.026769	-0.015482	0.019042	-0.061999	-0.019339
Pf3D7_06_v3	565889	579214	PF3D7_0613800	AP2 domain transcription factor, putative	-0.00148	0.034479	-0.00143		-0.066048	-0.001311	-0.033425	-0.044844	-0.016056
Pf3D7_06_v3	579215	586146	PF3D7_0613900	myosin E, putative	0.003944	0.006199	-0.018848		0.013273	0.06409	0.057361	0.033622	0.04822
Pf3D7_06_v3	586769	588885	PF3D7_0614000	thiamine-phosphate synthase, putative	0.010648	-0.038169	-0.01362		0.006994	0.02059	-0.037005	0.033686	0.04843
Pf3D7_06_v3	589207	592514	PF3D7_0614100	conserved Plasmodium protein, unknown function	-0.012179	0.102291	0.125607		-0.066224	0.004186	-0.001997	0.026665	0.03988
Pf3D7_06_v3	592922	596154	PF3D7_0614200	cytosolic Fe-S cluster assembly factor NAR1, putative	0.012441	0.055626	-0.018615		-0.018896	-0.04991	-0.083924	-0.095929	-0.028872
Pf3D7_06_v3	597234	600767	PF3D7_0614300	major facilitator superfamily-related transporter, putative	0.004567	0.000354	0.067468		0.009886	-0.019372	-0.012291	-0.00816	-0.063173
Pf3D7_06_v3	604323	605590	PF3D7_0614400	pre-mRNA-splicing factor CWF7, putative	0.023652	-0.1489	-0.052626		-0.04493	0.032614	0.012169	0.028817	0.014496
Pf3D7_06_v3	605892	607509	PF3D7_0614500	60S ribosomal protein L19	0.016786	-0.01815	-0.104104		0.045169	-0.003897	0.022562	0.018089	-0.064378
Pf3D7_06_v3	609008	611352	PF3D7_0614600	conserved Plasmodium protein, unknown function	0.012885	0.051839	-0.084303		0.005733	-0.014235	-0.006913	0.080931	0.011933
Pf3D7_06_v3	612221	614648	PF3D7_0614700	conserved Plasmodium protein, unknown function	-0.015281	0.011212	0.005806		0.024826	-0.005275	0.024336	0.04762	-0.102022
Pf3D7_06_v3	615047	616860	PF3D7_0614800	endonuclease III-like protein 1, putative	0.00306	-0.013399	0.044652		0.070253	-0.053509	0.006056	-0.07715	-0.093641
Pf3D7_06_v3	617512	621786	PF3D7_0614900	conserved Plasmodium membrane protein, unknown function	0.000342	0.087645	0.12685		-0.031054	-0.05356	-0.014294	-0.001717	-0.041348
Pf3D7_06_v3	622868	624571	PF3D7_0615100	enoyl-acyl carrier reductase	0.02551	-0.002134	-0.126646		0.028491	-0.005798	-0.007075	0.085032	0.052568
Pf3D7_06_v3	625115	627652	PF3D7_0615200	conserved protein, unknown function	-0.001423	0.058217	0.011495		-0.006008	-0.023607	-0.223351	-0.055546	-0.02782
Pf3D7_06_v3	627653	630567	PF3D7_0615300	GPI-anchored wall transfer protein 1, putative	-0.0153	0.045863	-0.02649		-0.0099	-0.039471	0.017838	0.081058	-0.044108
Pf3D7_06_v3	630706	640424	PF3D7_0615400	ribonuclease, putative	-0.013477	0.053255	0.051554		-0.011603	0.034158	-0.009159	0.001741	0.048036
Pf3D7_06_v3	643802	646403	PF3D7_0615500	cdc2-related protein kinase 5	-0.021754	0.044151	0.01889		-0.047822	0.036516	-0.087833	-0.032709	0.032643
Pf3D7_06_v3	646404	655846	PF3D7_0615600	zinc finger protein, putative	-0.002385	0.010958	-0.028788		-0.118752	-0.048765	-0.063906	0.00224	-0.054184
Pf3D7_06_v3	656126	657787	PF3D7_0615700	RNA and export factor binding protein, putative	-0.03135	0.056942	0.052115		-0.083902	0.104979	-0.075375	0.018569	0.184564
Pf3D7_06_v3	657788	662039	PF3D7_0615800	conserved oligomeric Golgi complex subunit 4, putative	-0.016636	0.046868	0.053121		-0.08098	0.006777	-0.093673	-0.008902	-0.011629
Pf3D7_06_v3	662185	668105	PF3D7_0615900	protein phosphatase, putative	-0.005189	0.012289	0.016499		-0.113811	-0.008547	-0.009803	0.015844	-0.006325
Pf3D7_06_v3	669610	671875	PF3D7_0616000	pyridoxal kinase	-0.00252	-0.149561	-0.078836		-0.066835	-0.15606	-0.022182	-0.052488	-0.091969
Pf3D7_06_v3	671876	673004	PF3D7_0616100	conserved Plasmodium protein, unknown function	0.022771	0.234003	0.312299		-0.163467	-0.101107	-0.051846	0.011408	-0.029576
Pf3D7_06_v3	673868	676625	PF3D7_0616200	kinetochore protein NDC80, putative	0.030332	-0.098872	-0.079567		0.106179	0.151835	0.098203	0.056559	0.15885
Pf3D7_06_v3	676638	677821	PF3D7_0616300	conserved Plasmodium protein, unknown function	-0.029525	0.107329	0.13493		-0.078412	0.024224	-0.0012	-0.065065	0.043655
Pf3D7_06_v3	678137	683679	PF3D7_0616400	conserved Plasmodium protein, unknown function	-8.2e-05	0.023803	0.040581		-0.055043	-0.035545	-0.042892	-0.059258	-0.023372
Pf3D7_06_v3	684492	689055	PF3D7_0616500	TRAP-like protein	0.019415	0.05527	0.01424		-0.058937	-0.004248	0.014099	-0.017327	-0.014261
Pf3D7_06_v3	689056	691381	PF3D7_0616600	conserved protein, unknown function	-0.029897	0.043154	0.070787		0.044689	0.068545	0.07324	0.092897	0.120137
Pf3D7_06_v3	691519	693569	PF3D7_0616700	ras GTPAse, putative	-0.004807	0.027491	0.013045		-0.007721	0.00324	-0.09306	-0.031596	0.033106
Pf3D7_06_v3	695679	697744	PF3D7_0616800	malate:quinone oxidoreductase	-0.013334	-0.117547	-0.10477		-0.019995	-0.002841	-0.009348	0.012366	-0.012131
Pf3D7_06_v3	699002	703467	PF3D7_0616900	conserved Plasmodium protein, unknown function	0.026538	-0.048177	0.030189		-0.060827	-0.030289	0.037627	-0.034268	-0.052889
Pf3D7_06_v3	703785	705418	PF3D7_0617000	mitochondrial import receptor subunit TOM40, putative	0.040646	-0.02753	-0.020834		0.124207	0.075212	-0.060188	-0.004345	0.023773
Pf3D7_06_v3	709809	714826	PF3D7_0617100	AP-2 complex subunit alpha, putative	0.018031	0.000861	-0.017614		-0.012909	0.034334	-0.094925	0.019104	0.011332
Pf3D7_06_v3	716800	719167	PF3D7_0617200	conserved protein, unknown function	0.001813	0.028178	0.062263		0.054446	0.121944	0.104319	0.089184	0.106724
Pf3D7_06_v3	720285	721562	PF3D7_0617300	conserved Plasmodium protein, unknown function	-0.035935	0.12458	0.117847		-0.099487	0.128063	0.040191	0.076993	-0.007953
Pf3D7_06_v3	754145	755055	PF3D7_0617900	histone H3 variant	-0.019898	-0.127251	0.011279		0.091467	-0.089651	0.123208	-0.016328	-0.119936
Pf3D7_06_v3	758359	761246	PF3D7_0618000	conserved Plasmodium membrane protein, unknown function	0.006439	0.05058	0.065539		0.077357	0.016878	0.062535	0.007031	-0.038872
Pf3D7_06_v3	761689	764418	PF3D7_0618100	conserved Plasmodium protein, unknown function	0.031027	-0.081132	-0.081516		0.04557	0.013156	-0.091388	0.011674	0.005187
Pf3D7_06_v3	764419	765742	PF3D7_0618200	conserved protein, unknown function	0.056987	-0.028356	-0.055903		0.085603	-0.039236	0.189966	-0.010039	0.013041
Pf3D7_06_v3	768542	769706	PF3D7_0618300	60S ribosomal protein L27a, putative	-0.002192	0.10947	0.011793		0.13177	0.046073	0.126369	0.143383	0.022628
Pf3D7_06_v3	769897	772756	PF3D7_0618400	LMBR1 domain-containing protein, putative	-0.001919	0.097213	-0.015432		0.052013	0.010693	-0.01886	0.000273	0.029085
Pf3D7_06_v3	774279	775720	PF3D7_0618500	malate dehydrogenase	-0.007157	-0.118791	-0.09749		0.106761	-0.024573	-0.012452	-0.098139	-0.004478
Pf3D7_06_v3	775730	778085	PF3D7_0618600	rhomboid protease ROM10	-0.004435	0.037129	0.063328		0.02612	0.043605	0.054068	0.096839	0.039451
Pf3D7_06_v3	778442	779742	PF3D7_0618700	trafficking protein particle complex subunit 6A, putative	-0.006889	-0.025197	-0.004186		-0.031337	0.015303	-0.082234	-0.068317	0.047088
Pf3D7_06_v3	779743	783546	PF3D7_0618800	heptatricopeptide repeat-containing protein, putative	-0.042164	-0.022028	0.084357		-0.00313	0.002971	-0.016772	-0.078357	-0.030419
Pf3D7_06_v3	784104	788277	PF3D7_0618900	phosphatidylinositol N-acetylglucosaminyltransferase subunit GPI1	-0.011701	-0.027476	0.054146		-0.039912	0.046088	0.055608	0.07854	0.078515
Pf3D7_06_v3	788457	796275	PF3D7_0619000	conserved protein, unknown function	-0.003747	-0.004793	-0.020728		-0.035081	0.008888	-0.010571	-0.030059	0.012782
Pf3D7_06_v3	796961	798768	PF3D7_0619100	conserved Plasmodium protein, unknown function	0.024122	0.075331	0.035206		-0.025752	-0.037744	-0.130357	0.004266	-0.049709
Pf3D7_06_v3	799147	803039	PF3D7_0619200	conserved Plasmodium protein, unknown function	-0.018083	0.046978	0.048988		-0.006879	0.015162	-0.086566	-0.022381	0.005713
Pf3D7_06_v3	803124	814802	PF3D7_0619300	conserved Plasmodium protein, unknown function	0.000478	-0.010562	0.042857		-0.008974	0.004995	-0.042014	-8.3e-05	-0.016878
Pf3D7_06_v3	815372	818497	PF3D7_0619400	cell division cycle protein 48 homologue, putative	-0.009314	-0.053581	0.027126		-0.021481	0.058167	-0.030277	0.047524	0.108913
Pf3D7_06_v3	819819	824497	PF3D7_0619500	acyl-CoA synthetase	0.001901	0.024535	-0.036415		-0.004025	0.020131	-0.013564	0.000216	0.049429
Pf3D7_06_v3	824907	827985	PF3D7_0619600	conserved Plasmodium protein, unknown function	-0.007686	0.048489	-0.064605		-0.03632	0.063734	-0.029408	0.01599	0.044843
Pf3D7_06_v3	827986	830639	PF3D7_0619700	conserved protein, unknown function	0.049273	0.014884	0.041353		-0.019984	0.038425	-0.121433	0.019452	0.037683
Pf3D7_06_v3	831036	839283	PF3D7_0619800	conserved Plasmodium membrane protein, unknown function	0.003236	0.03208	0.046852		-0.019832	0.050525	0.004594	0.035437	-0.022579
Pf3D7_06_v3	840273	841474	PF3D7_0619900	splicing factor 3A subunit 2, putative	-0.009036	-0.087917	0.031223		0.176078	0.228037	-0.049059	0.047516	0.22621
Pf3D7_06_v3	841596	843613	PF3D7_0620000	secreted ookinete protein 25, putative	0.01024	0.091797	0.013215		-0.01919	-0.037496	0.04387	0.0157	0.081047
Pf3D7_06_v3	845410	846340	PF3D7_0620100	ATP synthase-associated protein, putative	-0.00732	-0.128715	-0.044115		-0.025497	-0.075435	-0.106537	-0.003358	-0.081721
Pf3D7_06_v3	846341	847744	PF3D7_0620200	conserved Plasmodium protein, unknown function	-0.041083	0.037133	-0.099116		-0.006423	-0.030777	-0.029549	-0.025239	-0.119896
Pf3D7_06_v3	848155	851114	PF3D7_0620300	conserved Plasmodium protein, unknown function	-0.021597	0.023672	-0.064788		0.052477	0.030545	-0.011152	0.006898	0.150656
Pf3D7_06_v3	851128	853205	PF3D7_0620400	merozoite surface protein 10	0.025969	0.071866	0.028052		-0.034196	-0.046502	-0.07573	-0.040207	-0.035432
Pf3D7_06_v3	854910	857362	PF3D7_0620500	cleavage stimulation factor subunit 1, putative	0.009577	0.081102	0.035121		0.011035	0.051099	-0.032924	-0.099252	0.034795
Pf3D7_06_v3	857476	858818	PF3D7_0620600	conserved Plasmodium protein, unknown function	-0.000748	-0.204967	-0.115092		0.001565	0.062058	-0.053444	0.072121	0.13684
Pf3D7_06_v3	858819	860364	PF3D7_0620700	DnaJ protein, putative	0.006237	0.143433	0.084319		-0.005219	-0.001492	-0.07701	-0.007489	0.017151
Pf3D7_06_v3	862632	865630	PF3D7_0621000	conserved Plasmodium protein, unknown function	0.043522	0.042172	-0.131166		-0.033204	0.063914	-0.144945	-0.063155	0.026559
Pf3D7_06_v3	865631	870159	PF3D7_0621100	conserved Plasmodium protein, unknown function	0.002181	-0.007659	0.014199		-0.010056	0.023264	-0.00769	0.00046	-0.010529
Pf3D7_06_v3	871047	872452	PF3D7_0621200	pyridoxine biosynthesis protein PDX1	0.002025	-0.013939	-0.110413		0.01223	0.018002	-0.086452	0.014189	-0.066343
Pf3D7_06_v3	873559	876440	PF3D7_0621300	mRNA-binding protein PUF3	-0.018267	0.021652	0.004948		0.029992	-0.002103	-0.032519	0.006412	0.011566
Pf3D7_06_v3	878540	881034	PF3D7_0621400	Pf77 protein	0.007913	0.054573	-0.008978		0.033536	0.065633	0.029079	0.045135	0.070938
Pf3D7_06_v3	881713	883244	PF3D7_0621500	ribonuclease P/MRP protein subunit RPP1, putative	-0.044252	0.057641	0.169493		0.007115	0.068801	-0.056177	0.045464	0.149553
Pf3D7_06_v3	884178	889864	PF3D7_0621700	conserved Plasmodium protein, unknown function	0.028537	-0.008766	-0.068086		0.02358	0.051446	-0.117081	0.035752	-0.005608
Pf3D7_06_v3	891747	893027	PF3D7_0621800	nascent polypeptide-associated complex subunit alpha, putative	0.019505	0.148862	0.041811		-0.098137	0.105084	-0.010453	0.097558	-0.027212
Pf3D7_06_v3	893200	896030	PF3D7_0621900	signal recognition particle subunit SRP68, putative	-0.016939	-0.012077	0.012267		0.041972	0.053042	0.006775	0.075889	-0.000956
Pf3D7_06_v3	896739	898154	PF3D7_0622000	conserved Plasmodium protein, unknown function	-0.039215	0.027538	-0.033743		0.081066	0.153229	-0.005132	0.120335	0.129862
Pf3D7_06_v3	898155	902613	PF3D7_0622100	conserved Plasmodium protein, unknown function	-0.010254	-0.134107	-0.106219		0.031638	-0.043359	-0.130641	-0.003448	0.012748
Pf3D7_06_v3	903490	906572	PF3D7_0622200	radical SAM protein, putative	-0.023228	-0.041918	0.00407		-0.026208	-0.084204	-0.071116	-0.035247	-0.037422
Pf3D7_06_v3	907767	911299	PF3D7_0622300	vacuolar transporter chaperone, putative	0.013257	0.047411	-0.023334		0.044754	-0.07061	-0.030522	0.016147	0.003885
Pf3D7_06_v3	912156	913960	PF3D7_0622500	RNA methyltransferase, putative	0.00283	0.04951	0.053215		-0.042823	0.045631	0.004218	-0.020896	0.069675
Pf3D7_06_v3	914493	915679	PF3D7_0622600	cytochrome b-c1 complex subunit 9, putative	-0.025849	-0.029437	0.081205		0.1522	0.081864	0.048145	0.096917	0.043579
Pf3D7_06_v3	915750	917549	PF3D7_0622700	conserved Plasmodium membrane protein, unknown function	0.030841	-0.250442	-0.180409		0.020282	0.022502	-0.22614	0.043395	0.008967
Pf3D7_06_v3	919435	924278	PF3D7_0622800	leucine--tRNA ligase, putative	0.008415	-0.006451	0.028507		0.062128	0.044567	-0.01942	0.025545	0.030551
Pf3D7_06_v3	924855	931324	PF3D7_0622900	AP2 domain transcription factor AP2Tel	0.020033	0.060406	-0.008486		-0.014114	0.010825	-0.099455	-0.029524	-0.032063
Pf3D7_06_v3	936818	938901	PF3D7_0623000	chorismate synthase	-0.00381	-0.043485	-0.074677		-0.029515	-0.060466	-0.131964	-0.137498	-0.075618
Pf3D7_06_v3	939410	943970	PF3D7_0623100	nuclear polyadenylated RNA-binding protein NAB2, putative	-0.006775	0.003883	-0.039714		0.018592	0.086292	0.028435	0.110542	0.030176
Pf3D7_06_v3	945879	947368	PF3D7_0623200	ferredoxin--NADP reductase	0.018151	0.077927	-0.000726		0.014837	-0.009841	-0.062596	-0.010039	-0.018733
Pf3D7_06_v3	947369	948894	PF3D7_0623300	EGF-like membrane protein, putative	0.026654	-0.019672	-0.060158		0.036787	-0.013218	-0.002252	0.095605	0.035275
Pf3D7_06_v3	949973	951756	PF3D7_0623400	MEI2-like RNA-binding protein, putative	0.017904	0.0538	-0.046275		0.079503	0.054898	0.049995	-0.026912	0.088019
Pf3D7_06_v3	952656	955098	PF3D7_0623500	superoxide dismutase [Fe]	0.017551	-0.03336	0.026568		0.13132	0.117706	0.09305	0.057262	0.133649
Pf3D7_06_v3	956515	958944	PF3D7_0623600	transcription or splicing factor-like protein, putative	0.019248	0.010444	-0.003461		0.002427	-0.049482	-0.024096	-0.018705	-0.070685
Pf3D7_06_v3	958945	962795	PF3D7_0623700	ATP-dependent RNA helicase SUV3, putative	-0.01054	-0.00144	0.059894		-0.037162	-0.112582	-0.066771	-0.059629	-0.104498
Pf3D7_06_v3	963491	971205	PF3D7_0623800	tyrosine kinase-like protein, putative	0.006206	0.023094	0.013004		-0.015145	0.004914	-0.017282	0.051069	-0.010036
Pf3D7_06_v3	976933	978299	PF3D7_0623900	ribonuclease H2 subunit A, putative	0.009846	-0.194724	-0.210889		0.0548	-0.050695	-0.097773	-0.075942	-0.125512
Pf3D7_06_v3	980816	982797	PF3D7_0624000	hexokinase	-0.014913	-0.152368	-0.071053		0.061737	0.063118	-0.088405	0.053553	0.054976
Pf3D7_06_v3	983696	985018	PF3D7_0624100	conserved protein, unknown function	-0.010033	0.071228	0.005177		0.119367	0.174849	-0.028815	0.104043	0.112346
Pf3D7_06_v3	985019	987120	PF3D7_0624200	conserved Plasmodium protein, unknown function	-0.016348	-0.041988	-0.027659		-0.012807	0.072285	-0.00893	0.068359	0.127675
Pf3D7_06_v3	987558	989886	PF3D7_0624300	CPW-WPC family protein	0.021921	-0.025506	-0.001857		0.163472	0.15894	0.075572	0.068198	0.039481
Pf3D7_06_v3	990125	992448	PF3D7_0624400	conserved protein, unknown function	0.042519	-0.138271	-0.034551		-0.017342	-0.06394	-0.065171	-0.000617	-0.032471
Pf3D7_06_v3	994034	994803	PF3D7_0624500	anaphase-promoting complex subunit 11, putative	0.0234	0.078145	-0.027413		-0.026395	-0.024162	0.02538	0.08534	-0.094279
Pf3D7_06_v3	999274	1007933	PF3D7_0624600	SNF2 helicase, putative	0.008734	0.010113	0.030071		-0.009527	0.026651	-0.016123	-0.010061	0.010884
Pf3D7_06_v3	1009207	1010968	PF3D7_0624700	N-acetylglucosaminyl-phosphatidylinositol de-N-acetylase, putative	-0.018283	0.037849	-0.022594		0.15526	0.032445	-0.074338	-0.021317	0.056297
Pf3D7_06_v3	1011179	1014819	PF3D7_0624800	conserved Plasmodium protein, unknown function	-0.008119	0.030832	0.043554		0.017619	-0.006376	-0.020133	0.029321	-0.036044
Pf3D7_06_v3	1015618	1018694	PF3D7_0624900	GAS8-like protein, putative	-0.017399	-0.004199	-0.00042		0.02771	0.022248	0.006582	0.103346	0.016179
Pf3D7_06_v3	1019774	1022125	PF3D7_0625000	sphingomyelin synthase 1, putative	-0.01726	0.064921	0.070565		-0.011193	0.068496	-0.10058	-0.014255	0.091841
Pf3D7_06_v3	1022765	1024464	PF3D7_0625100	sphingomyelin synthase 2, putative	0.002266	0.09567	0.10546		0.020302	-0.02246	-0.046126	0.062002	0.070198
Pf3D7_06_v3	1024929	1026579	PF3D7_0625200	conserved Plasmodium protein, unknown function	-0.006431	0.064409	-0.075639		0.000757	0.065518	-0.060928	0.148502	0.014737
Pf3D7_06_v3	1026580	1031407	PF3D7_0625300	DNA polymerase 1, putative	-0.016608	0.00546	0.031857		-0.04451	0.037481	-0.06473	-0.011086	-0.00607
Pf3D7_06_v3	1032286	1034024	PF3D7_0625400	conserved Plasmodium protein, unknown function	-0.064499	0.00092	0.039379		0.085477	0.018905	-0.068287	-0.030599	0.030319
Pf3D7_06_v3	1035108	1036621	PF3D7_0625500	conserved Plasmodium membrane protein, unknown function	0.032103	-0.074436	-0.116277		-0.003393	0.041949	-0.239143	0.038625	0.013772
Pf3D7_06_v3	1039405	1041800	PF3D7_0625600	poly(A) polymerase PAP, putative	0.005687	-0.043995	-0.062824		-0.046695	-0.013155	-0.042766	0.014743	-0.023381
Pf3D7_06_v3	1043296	1045724	PF3D7_0625800	conserved Plasmodium protein, unknown function	-0.044969	0.020879	0.06759		-0.025815	0.058767	-0.050499	-0.010539	0.068922
Pf3D7_06_v3	1046736	1048302	PF3D7_0625900	conserved Plasmodium protein, unknown function	0.018443	0.020273	0.112123		0.0977	0.088301	0.119205	0.070703	0.12349
Pf3D7_06_v3	1048460	1054215	PF3D7_0626000	conserved Plasmodium protein, unknown function	0.013788	-0.072988	-0.057775		-0.063677	-0.031578	-0.101256	0.0269	0.007427
Pf3D7_06_v3	1055802	1058597	PF3D7_0626100	oxidoreductase, short-chain dehydrogenase family, putative	0.002457	0.003117	0.059835		-0.029685	-0.083344	-0.015785	0.00318	-0.045915
Pf3D7_06_v3	1058598	1060172	PF3D7_0626200	conserved Plasmodium protein, unknown function	0.002188	0.096444	0.16656		-0.039827	0.087662	-0.060218	0.007883	0.037435
Pf3D7_06_v3	1060865	1063141	PF3D7_0626300	3-oxoacyl-acyl-carrier protein synthase I/II	-0.016656	0.019611	-0.009412		0.015996	0.069918	-0.065613	0.042	0.130627
Pf3D7_06_v3	1064897	1068876	PF3D7_0626400	CRAL/TRIO domain-containing protein, putative	-0.008107	-0.022785	-0.012056		-0.043521	0.029274	-0.071224	-0.018889	-0.064354
Pf3D7_06_v3	1069712	1073055	PF3D7_0626500	conserved Plasmodium protein, unknown function	-0.058374	0.119305	0.16168		0.026192	0.034095	-0.125989	0.008056	0.038722
Pf3D7_06_v3	1073208	1074145	PF3D7_0626600	conserved Plasmodium protein, unknown function	-0.043373	-0.089263	0.044614		0.091493	0.046214	-0.070487	0.129114	0.020935
Pf3D7_06_v3	1074768	1076386	PF3D7_0626700	ATPase	0.006227	-0.048815	-0.006315		-0.048902	0.009204	-0.10599	-0.021666	-0.018745
Pf3D7_06_v3	1078745	1081570	PF3D7_0626800	pyruvate kinase	0.005317	0.006283	0.047819		0.051716	0.043586	-0.039312	0.081958	0.080491
Pf3D7_06_v3	1082660	1084268	PF3D7_0626900	mitochondrial ribosomal protein L46 precursor, putative	-0.003572	0.155401	0.178732		-0.009883	-0.02454	0.09663	0.132868	-0.049919
Pf3D7_06_v3	1088940	1094578	PF3D7_0627100	ankyrin-repeat protein, putative	0.002032	0.017135	0.038131		0.029002	0.023938	-0.006644	-0.005656	-0.025916
Pf3D7_06_v3	1094815	1096623	PF3D7_0627200	myosin light chain, putative	0.034285	0.058107	0.000751		0.043769	0.050769	-0.078885	0.078515	0.030271
Pf3D7_06_v3	1097050	1098899	PF3D7_0627300	E3 ubiquitin-protein ligase RNF5, putative	0.016052	-0.048125	-0.050329		-0.00324	0.056604	-0.058319	0.09031	-0.021155
Pf3D7_06_v3	1100027	1101108	PF3D7_0627400	mitochondrial import inner membrane translocase subunit TIM22, putative	0.01392	-0.024708	-0.081683		0.13116	0.012402	-0.070458	0.031139	0.015307
Pf3D7_06_v3	1101484	1103102	PF3D7_0627500	protein DJ-1	0.01595	0.016294	-0.022871		-0.131958	-0.050265	0.089878	0.048734	-0.082276
Pf3D7_06_v3	1103765	1105449	PF3D7_0627600	conserved Plasmodium protein, unknown function	-0.027653	0.019241	0.165357		-0.018523	0.064944	0.019694	0.020421	-0.053607
Pf3D7_06_v3	1107947	1111890	PF3D7_0627700	transportin	0.004329	0.020216	-0.021305		0.040887	0.082565	-0.069801	0.022143	0.027463
Pf3D7_06_v3	1114294	1117787	PF3D7_0627800	acetyl-CoA synthetase, putative	0.003675	-0.039269	-0.026252		-0.047525	-0.016017	-0.054659	-0.022748	0.034656
Pf3D7_06_v3	1119337	1121108	PF3D7_0627900	ribonuclease P protein subunit p29, putative	-0.020538	-0.006018	0.037027		0.030682	0.045648	0.04535	0.013515	0.118632
Pf3D7_06_v3	1121440	1122461	PF3D7_0628000	6-pyruvoyltetrahydropterin synthase	-0.061961	0.054942	-0.024937		-0.075693	-0.038948	-0.080205	-0.037673	-0.202611
Pf3D7_06_v3	1122551	1153914	PF3D7_0628100	HECT-domain (ubiquitin-transferase), putative	-0.004561	0.07535	0.096682		0.01589	0.105344	-0.003666	0.045048	0.062545
Pf3D7_06_v3	1159612	1169330	PF3D7_0628200	eukaryotic translation initiation factor 2-alpha kinase	-0.007626	0.034122	0.054772		0.041698	0.021766	-0.043952	0.007079	0.00895
Pf3D7_06_v3	1170563	1173946	PF3D7_0628300	choline/ethanolaminephosphotransferase, putative	0.012839	-0.015431	-0.072158		0.017045	0.014824	0.022665	0.07468	-0.015151
Pf3D7_06_v3	1176015	1178820	PF3D7_0628400	protease, putative	0.009294	-0.016504	-0.027832		0.131971	0.103176	0.051138	0.077937	0.057046
Pf3D7_06_v3	1178821	1180253	PF3D7_0628500	conserved Plasmodium protein, unknown function	-0.037225	0.346512	0.320962		0.075717	0.101231	0.193123	0.090389	0.026516
Pf3D7_06_v3	1180323	1182603	PF3D7_0628600	DNA methyltransferase 1-associated protein 1, putative	0.008635	0.018835	-0.005887		0.117916	0.033036	0.006505	0.060349	0.032852
Pf3D7_06_v3	1183646	1185806	PF3D7_0628700	conserved Plasmodium protein, unknown function	-0.055414	0.056641	-0.008679		0.017914	0.049909	0.026176	0.148831	0.065416
Pf3D7_06_v3	1185807	1188894	PF3D7_0628800	glutamyl-tRNA(Gln) amidotransferase subunit B	0.009324	-0.072675	-0.062684		0.011052	-0.024246	-0.07432	-0.070921	0.000107
Pf3D7_06_v3	1189222	1194141	PF3D7_0628900	RAP protein, putative	0.014053	0.033014	0.059288		0.011328	-0.021216	-0.085808	0.036327	0.044165
Pf3D7_06_v3	1194142	1195429	PF3D7_0629000	glucosamine 6-phosphate N-acetyltransferase	-0.003527	0.258679	0.026943		0.077454	0.152305	0.182968	0.153755	0.280147
Pf3D7_06_v3	1195791	1198288	PF3D7_0629100	nicotinate phosphoribosyltransferase, putative	-0.01477	-0.025631	-0.052434		0.048623	0.063181	-0.063183	0.039435	0.13645
Pf3D7_06_v3	1199603	1201245	PF3D7_0629200	DnaJ protein, putative	-0.008001	-0.027226	-0.059651		0.10718	0.071287	-0.027176	0.014774	0.002518
Pf3D7_06_v3	1204940	1208031	PF3D7_0629300	phospholipase, putative	-0.005502	0.119232	0.130838		0.031553	0.055304	0.002575	0.017837	0.079532
Pf3D7_06_v3	1210170	1213012	PF3D7_0629400	polyadenylate-binding protein 3, putative	-0.005364	0.029603	0.112264		-0.009013	0.069911	0.04653	0.074337	0.047356
Pf3D7_06_v3	1213698	1216255	PF3D7_0629500	amino acid transporter AAT1	-0.019515	0.046824	0.013435		-0.001845	0.02869	-0.030058	-0.022104	0.024685
Pf3D7_06_v3	1218057	1219501	PF3D7_0629600	RNA-binding protein, putative	-0.020885	0.000116	0.044235		-0.074416	-0.014916	-0.153677	-0.010877	0.040352
Pf3D7_06_v3	1221691	1243172	PF3D7_0629700	SET domain protein, putative	-0.013733	0.034003	-0.002116		-0.019465	0.029561	-0.048534	0.018567	0.003597
Pf3D7_06_v3	1243330	1247469	PF3D7_0629800	cullin-like protein, putative	-0.026689	0.177584	0.060535		-0.037342	0.010925	0.003904	0.013753	-0.037649
Pf3D7_06_v3	1250162	1251851	PF3D7_0629900	sec14-like cytosolic factor or phosphatidylinositol/phosphatidylcholine transfer protein, putative	-0.012925	0.035594	0.019309		-0.004186	0.004258	-0.092969	0.024517	-0.077221
Pf3D7_06_v3	1251852	1254235	PF3D7_0630000	CPW-WPC family protein	0.007456	0.046427	0.050261		0.002253	-0.066163	-0.061553	0.033236	-0.060398
Pf3D7_06_v3	1254657	1257190	PF3D7_0630100	conserved Plasmodium protein, unknown function	-0.021152	-0.001142	-0.00649		-0.0054	-0.124339	-0.071498	-0.015472	-0.112651
Pf3D7_06_v3	1258630	1260168	PF3D7_0630200	secreted ookinete protein, putative	-0.031907	0.124706	0.021654		-0.123027	-0.089832	0.015749	0.057823	-0.081524
Pf3D7_06_v3	1260169	1269846	PF3D7_0630300	DNA polymerase epsilon catalytic subunit A, putative	-0.005243	0.056425	2.5e-05		-0.014915	-0.032404	-0.062063	-0.003414	-0.011047
Pf3D7_06_v3	1272113	1273782	PF3D7_0630400	conserved Plasmodium protein, unknown function	-0.005629	0.075842	-0.123445		0.039855	0.045148	-0.066766	0.023867	0.002442
Pf3D7_06_v3	1276079	1278075	PF3D7_0630500	ribosome biogenesis protein YTM1, putative	-0.020466	0.079454	-0.003263		-0.031648	-0.040787	0.042338	0.012651	0.088382
Pf3D7_06_v3	1279570	1283496	PF3D7_0630600	conserved protein, unknown function	-0.021304	0.147117	0.128508		0.005239	0.024865	0.077457	-0.044272	0.03513
Pf3D7_06_v3	1284808	1287281	PF3D7_0630700	bifunctional methylenetetrahydrofolate dehydrogenase/cyclohydrolase, putative	0.007314	-0.043988	-0.072874		0.090316	-0.076331	0.155764	-0.097581	-0.099514
Pf3D7_06_v3	1287987	1290920	PF3D7_0630800	TPH domain-containing protein, putative	-0.032038	0.138064	0.116576		-0.123434	-0.096235	-0.027839	-0.073951	-0.111837
Pf3D7_06_v3	1290921	1293222	PF3D7_0630900	ATP-dependent RNA helicase HAS1	0.012057	0.099153	0.021163		-0.028003	-0.074479	-0.003819	-0.098273	-0.079875
Pf3D7_07_v3	79640	83193	PF3D7_0701900	Plasmodium exported protein, unknown function	0.006088	0.02663	0.023044		0.14859	0.196316	0.188754	0.114794	0.113908
Pf3D7_07_v3	84547	85924	PF3D7_0702000	Plasmodium exported protein (hyp12), unknown function	-0.026659	0.129245	0.064937		-0.130362	-0.046041	0.12953	-0.101127	-0.067174
Pf3D7_07_v3	88435	91136	PF3D7_0702100	Plasmodium exported protein (PHISTb), unknown function, pseudogene	-0.019218	0.043773	0.054401		-0.035083	-0.008725	0.153377	0.030006	0.013499
Pf3D7_07_v3	91617	93391	PF3D7_0702200	lysophospholipase, putative	0.00578	0.07231	0.040135		0.056271	0.154867	0.357692	0.039676	0.019235
Pf3D7_07_v3	96511	98980	PF3D7_0702300	sporozoite threonine and asparagine-rich protein	-0.032714	0.077645	0.04839		0.030799	0.015933	0.055077	0.051546	-0.054371
Pf3D7_07_v3	101444	102535	PF3D7_0702400	small exported membrane protein 1	0.003137	0.14154	0.037787		0.010964	-0.079315	-0.020012	0.05939	-0.192473
Pf3D7_07_v3	104707	106239	PF3D7_0702500	Plasmodium exported protein, unknown function	-0.0198	0.183438	0.147218		-0.129381	-0.034491	0.092643	-0.053684	-0.096814
Pf3D7_07_v3	109665	110428	PF3D7_0702600	chitinase precursor fragment, truncated	-0.012476	0.109684	0.101234		-0.02174	0.035496	0.152076	0.095001	0.103287
Pf3D7_07_v3	112894	114198	PF3D7_0702900	centrin, putative	0.014518	0.170452	0.024504		0.101623	0.116978	-0.036593	0.062249	-0.001344
Pf3D7_07_v3	114989	121020	PF3D7_0703000	conserved Plasmodium protein, unknown function	-0.000119	0.002712	-0.061502		0.068463	-0.022296	-0.143594	-0.043439	-0.006016
Pf3D7_07_v3	121164	122206	PF3D7_0703100	cytosolic iron-sulfur assembly component 2, putative	0.03004	0.137338	-0.027921		-0.10735	-0.142059	-0.183567	-0.112919	-0.204443
Pf3D7_07_v3	122263	127385	PF3D7_0703200	conserved Plasmodium protein, unknown function	-0.011592	0.00237	-0.019585		0.023334	-0.01679	-0.01372	0.018447	-0.00976
Pf3D7_07_v3	128290	129175	PF3D7_0703300	conserved Plasmodium protein, unknown function	-0.000225	0.043374	0.111622		0.06262	0.056231	-0.073866	-0.081769	-0.006644
Pf3D7_07_v3	129176	132082	PF3D7_0703400	conserved Plasmodium protein, unknown function	-0.019449	0.144633	0.049706		-0.094857	-0.048028	-0.057225	-0.070249	-0.09758
Pf3D7_07_v3	135356	142755	PF3D7_0703500	erythrocyte membrane-associated antigen	-0.011547	0.062353	0.02036		-0.044691	0.004369	0.01638	-0.008813	-0.037423
Pf3D7_07_v3	143769	146203	PF3D7_0703600	conserved protein, unknown function	-0.006078	0.087287	0.104178		0.05283	0.11823	0.043615	0.066902	0.084023
Pf3D7_07_v3	146395	147644	PF3D7_0703700	conserved protein, unknown function	0.004785	-0.002223	-0.079997		0.046077	0.025806	-0.035713	-0.070112	-0.066661
Pf3D7_07_v3	149554	153150	PF3D7_0703800	conserved Plasmodium protein, unknown function	0.014141	0.053845	0.094822		-0.128074	-0.055436	0.118963	0.032533	0.038048
Pf3D7_07_v3	153151	166646	PF3D7_0703900	conserved Plasmodium membrane protein, unknown function	-0.002997	-0.00964	0.010828		0.000782	-0.007152	-0.06659	-0.040226	0.037826
Pf3D7_07_v3	167239	177545	PF3D7_0704000	conserved Plasmodium membrane protein, unknown function	-0.017521	0.04572	0.001886		0.007734	0.013293	0.015182	-0.005477	0.029471
Pf3D7_07_v3	179786	190965	PF3D7_0704100	conserved Plasmodium membrane protein, unknown function	-0.008631	0.070833	0.048318		0.020486	0.021941	-0.015481	0.004059	0.033483
Pf3D7_07_v3	191059	195140	PF3D7_0704200	tRNA m5C-methyltransferase, putative	0.005389	0.0151	0.055649		-0.011713	-0.02015	-0.097255	-0.026672	0.026491
Pf3D7_07_v3	197441	203499	PF3D7_0704300	conserved Plasmodium membrane protein, unknown function	0.001229	0.044398	0.053099		-0.01798	-0.012117	-0.06856	0.028469	0.045941
Pf3D7_07_v3	204468	208000	PF3D7_0704400	phosphoinositide-binding protein, putative	0.007641	0.042063	0.006		0.065411	0.046029	-0.020003	0.022581	0.065469
Pf3D7_07_v3	208440	213751	PF3D7_0704500	serine/threonine protein kinase, putative	-0.003585	0.028444	-0.0378		-0.05598	-0.084212	-0.053022	-0.035379	-0.077775
Pf3D7_07_v3	215774	229322	PF3D7_0704600	E3 ubiquitin-protein ligase	0.00476	0.032235	0.004377		-0.008097	-0.01742	-0.088929	0.026575	-0.045143
Pf3D7_07_v3	233151	237664	PF3D7_0704700	phosphopantetheine adenylyltransferase, putative	0.036507	0.156011	0.070685		-0.038666	-0.012173	0.008974	-0.005669	0.000528
Pf3D7_07_v3	237909	242302	PF3D7_0704800	protein phosphatase PPM12, putative	0.022758	0.018685	-0.014901		0.040898	0.030314	0.007501	0.072396	0.02469
Pf3D7_07_v3	243648	245266	PF3D7_0704900	peptide chain release factor 2	-0.026592	-0.064871	0.016124		0.043341	0.079747	-0.052816	0.055271	-0.089709
Pf3D7_07_v3	246009	250402	PF3D7_0705000	mRNA cap guanine-N7 methyltransferase, putative	0.01222	-0.026374	-0.065635		0.03904	0.025108	-0.025676	0.080923	0.043226
Pf3D7_07_v3	252032	255501	PF3D7_0705100	conserved Plasmodium protein, unknown function	-0.001576	0.086289	-0.000513		-0.010981	-0.001995	-0.051968	0.007488	0.024957
Pf3D7_07_v3	255836	260934	PF3D7_0705200	conserved Plasmodium protein, unknown function	0.023024	0.029869	-0.094228		0.015393	-0.08817	-0.168553	-0.016016	-0.053277
Pf3D7_07_v3	261727	264704	PF3D7_0705300	origin recognition complex subunit 2	-0.004642	0.043522	0.05899		0.180865	0.096359	0.011849	-0.027292	0.133946
Pf3D7_07_v3	264723	267688	PF3D7_0705400	DNA replication licensing factor MCM7	-0.014243	0.021841	-0.010068		-0.006048	0.049987	-0.019985	0.030907	0.070782
Pf3D7_07_v3	269772	278956	PF3D7_0705500	inositol-phosphate phosphatase, putative	0.005185	-0.006668	-0.037365		-0.017281	0.014063	-0.018676	-0.024846	-0.023743
Pf3D7_07_v3	280785	284683	PF3D7_0705600	RNA helicase, putative	-0.004319	0.024666	-0.032248		-0.009613	-0.04162	-0.009889	-0.041779	-0.052405
Pf3D7_07_v3	285222	286416	PF3D7_0705700	40S ribosomal protein S29, putative	0.007597	0.101858	0.051399		0.08119	0.02074	-0.11072	0.001286	-0.025927
Pf3D7_07_v3	287347	289338	PF3D7_0705800	cysteine-rich secretory protein, putative	0.008142	0.086646	0.086729		-0.021835	0.013521	0.058158	0.043763	-0.001419
Pf3D7_07_v3	289850	291470	PF3D7_0705900	ATP synthase subunit C, putative	0.037683	-0.051156	-0.115431		0.153281	0.113391	0.070671	0.123416	-0.043411
Pf3D7_07_v3	293150	297297	PF3D7_0706000	importin-7, putative	-0.013254	-0.025105	-0.065762		-0.019553	0.021957	-0.056942	-0.023671	-0.038488
Pf3D7_07_v3	297298	303309	PF3D7_0706100	conserved Plasmodium protein, unknown function	0.021627	0.080417	0.048845		0.023473	0.03036	-0.062409	0.016661	0.00267
Pf3D7_07_v3	305313	306282	PF3D7_0706300	conserved Plasmodium protein, unknown function	-0.003653	-0.043053	-0.065752		0.041335	-0.031207	-0.096584	-0.010291	-0.111985
Pf3D7_07_v3	309652	315272	PF3D7_0706500	conserved Plasmodium protein, unknown function	-0.021455	0.022118	-0.04083		-0.048116	-0.080329	-0.116648	-0.083357	-0.038924
Pf3D7_07_v3	319998	322531	PF3D7_0706600	conserved Plasmodium protein, unknown function	-0.002413	0.08135	0.012041		0.023987	0.059388	-0.059442	0.028313	0.116037
Pf3D7_07_v3	322657	325778	PF3D7_0706700	DNA mismatch repair protein MSH2, putative	0.032691	-0.00419	0.025554		-0.000376	0.068814	-0.090257	-0.024695	0.016052
Pf3D7_07_v3	329686	336575	PF3D7_0707200	conserved Plasmodium protein, unknown function	-0.007181	0.009267	-0.015007		-0.041978	0.017469	-0.025793	-0.037026	-0.002291
Pf3D7_07_v3	338635	342333	PF3D7_0707300	rhoptry-associated membrane antigen	0.011533	-0.08439	-0.044475		0.037742	-0.007287	0.060016	-0.015896	0.014691
Pf3D7_07_v3	343662	346153	PF3D7_0707400	AAA family ATPase, putative	0.002577	-0.031697	-0.072527		0.028718	0.032994	-0.162783	-0.010069	-0.022344
Pf3D7_07_v3	348027	353332	PF3D7_0707500	conserved Plasmodium protein, unknown function	0.014506	-0.160931	-0.138167		0.014443	0.030412	-0.106333	0.080379	-0.008138
Pf3D7_07_v3	353736	354970	PF3D7_0707600	mediator of RNA polymerase II transcription subunit 10, putative	-0.028023	-0.036577	0.086343		0.090575	0.096195	-0.061452	-0.051433	0.057624
Pf3D7_07_v3	357450	360835	PF3D7_0707700	E3 ubiquitin-protein ligase, putative	-0.010809	-0.113235	-0.024923		0.003949	0.023131	-0.119006	-0.049598	-0.053694
Pf3D7_07_v3	361755	366029	PF3D7_0707800	RAP protein, putative	0.020478	-0.034624	-0.075268		-0.029035	0.01009	-0.111706	0.015201	-0.060831
Pf3D7_07_v3	366679	367958	PF3D7_0707900	ribosomal protein S8e, putative	0.016726	-0.074054	-0.110547		-0.03638	-0.02058	-0.077474	-0.019097	-0.034261
Pf3D7_07_v3	368457	371922	PF3D7_0708000	cytoskeleton associated protein, putative	0.008546	-0.08918	-0.019414		-0.076288	-0.067629	0.029553	-0.032506	-0.098011
Pf3D7_07_v3	372647	373356	PF3D7_0708100	DNA-directed RNA polymerases I, II, and III subunit RPABC5, putative	0.03199	0.043033	0.117082		-0.105742	-0.062299	0.026626	0.035519	-0.047162
Pf3D7_07_v3	373993	377643	PF3D7_0708200	conserved Plasmodium protein, unknown function	-0.007533	-0.021222	0.008767		-0.072301	-0.020073	-0.127909	-0.061426	-0.051398
Pf3D7_07_v3	377781	379555	PF3D7_0708300	EKC/KEOPS complex subunit BUD32	0.028035	-0.010576	-0.030186		-0.076092	0.016226	-0.144422	-0.010884	-0.080137
Pf3D7_07_v3	381342	384864	PF3D7_0708400	heat shock protein 90	-0.002672	0.060171	0.050307		0.010574	-0.020041	0.105839	0.030782	-0.005045
Pf3D7_07_v3	385333	388571	PF3D7_0708500	heat shock protein 86 family protein	-0.000473	-0.08845	-0.006461		0.07763	0.012211	0.029841	0.055342	0.003595
Pf3D7_07_v3	389223	390615	PF3D7_0708600	inner membrane complex protein 1d, putative	0.018877	0.079105	-0.04861		0.106045	-0.019085	0.051384	0.028551	-0.024902
Pf3D7_07_v3	391252	392438	PF3D7_0708700	Cg8 protein	0.004013	0.102112	0.0714		-0.095339	-0.10943	-0.129566	-0.020422	-0.15618
Pf3D7_07_v3	395461	398582	PF3D7_0708800	heat shock protein 110	0.001679	0.005302	-0.02136		0.009628	-0.019684	-0.010553	-0.059039	0.051005
Pf3D7_07_v3	399040	400493	PF3D7_0708900	protein SCO1, putative	-0.009985	-0.16744	-0.057818		-0.006846	-0.062021	-0.044921	-0.005363	0.009119
Pf3D7_07_v3	402972	406567	PF3D7_0709000	chloroquine resistance transporter	0.02536	-0.058567	-0.042861		0.06713	0.06079	-0.007346	0.04755	0.059547
Pf3D7_07_v3	407965	412152	PF3D7_0709100	Cg1 protein	-0.002423	0.050451	0.095642		-0.101977	-0.031866	-0.056802	-0.005216	-0.117347
Pf3D7_07_v3	412153	413360	PF3D7_0709200	glutaredoxin-like protein	-0.035131	-0.042209	0.08145		-0.139793	-0.222711	-0.036983	-0.082063	-0.198187
Pf3D7_07_v3	413361	421999	PF3D7_0709300	Cg2 protein	-0.00278	0.033064	0.048549		-0.056812	-0.027035	-0.012698	0.007818	-0.019409
Pf3D7_07_v3	422986	427484	PF3D7_0709400	Cg7 protein	-0.001632	-0.056157	0.053745		-0.066151	0.025794	-0.088712	-0.056798	-0.054783
Pf3D7_07_v3	429607	434008	PF3D7_0709600	ribonucleases P/MRP protein subunit POP1, putative	-0.017345	-0.036022	-0.029279		-0.007143	-0.061148	-0.104932	-0.040533	0.00325
Pf3D7_07_v3	434839	436445	PF3D7_0709700	prodrug activation and resistance esterase	0.014823	-0.074011	-0.007226		-0.023307	-0.07217	-0.039596	-0.064354	-0.041201
Pf3D7_07_v3	438326	446131	PF3D7_0709900	conserved protein, unknown function	-0.015714	0.027412	0.076465		0.023144	-0.000286	-0.010831	-0.011504	-0.018632
Pf3D7_07_v3	447265	458746	PF3D7_0710000	conserved Plasmodium protein, unknown function	-0.030592	-0.010375	-0.014198		0.006904	0.037832	-0.07989	-0.028605	0.017322
Pf3D7_07_v3	459807	461686	PF3D7_0710100	conserved protein, unknown function	-0.006805	-0.084462	-0.032022		0.071564	0.042665	0.017738	0.003266	0.038816
Pf3D7_07_v3	462855	472087	PF3D7_0710200	conserved Plasmodium protein, unknown function	0.003349	-0.04624	-0.023758		-0.00347	0.010907	-0.043333	0.023647	0.03492
Pf3D7_07_v3	472251	473791	PF3D7_0710300	conserved protein, unknown function	0.01686	-0.084383	0.125721		0.001944	-0.076619	0.110951	0.034455	-0.013485
Pf3D7_07_v3	474373	475918	PF3D7_0710400	DNA repair protein RAD14, putative	-0.000761	0.017272	0.010054		0.013142	0.139956	-0.04476	0.026612	0.039232
Pf3D7_07_v3	475919	477802	PF3D7_0710500	conserved protein, unknown function	-0.005341	-0.157218	-0.150473		0.08574	0.055981	-0.07642	-0.02995	0.032995
Pf3D7_07_v3	478218	479388	PF3D7_0710600	60S ribosomal protein L34	-0.014987	0.003043	0.034266		0.039685	-0.114073	-0.02416	-0.045051	-0.260432
Pf3D7_07_v3	482451	484081	PF3D7_0710800	protein transport protein USE1, putative	-0.013758	0.0144	-0.108891		-0.032498	-0.019795	0.003163	-0.061963	-0.02579
Pf3D7_07_v3	484588	486287	PF3D7_0710900	50S ribosomal protein L1, mitochondrial, putative	0.004828	-0.018569	0.073518		-0.090425	-0.049618	-0.033393	-0.013511	-0.106929
Pf3D7_07_v3	487031	491220	PF3D7_0711000	AAA family ATPase, CDC48 subfamily	0.000142	-0.003541	0.010396		-0.017274	-0.026162	-0.096734	-0.051648	-0.038988
Pf3D7_07_v3	492269	493482	PF3D7_0711100	conserved protein, unknown function	0.010696	-0.02093	-0.023806		0.075914	0.107392	-0.05666	-0.010398	0.03509
Pf3D7_07_v3	494988	498490	PF3D7_0711200	conserved Plasmodium protein, unknown function	0.006428	-0.000252	-0.015024		-0.030069	-0.091205	0.057868	-0.004423	-0.086769
Pf3D7_07_v3	499086	499945	PF3D7_0711300	conserved Plasmodium protein, unknown function	0.036252	-0.044266	-0.041063		0.002857	0.068313	0.109796	0.138433	0.01386
Pf3D7_07_v3	500158	502844	PF3D7_0711400	histone deacetylase complex subunit SAP18, putative	-0.000501	-0.000806	0.017466		0.088727	0.084932	0.122506	0.040495	0.072427
Pf3D7_07_v3	504995	507561	PF3D7_0711500	regulator of chromosome condensation, putative	0.009315	0.090705	0.057698		0.044164	0.079558	0.082677	0.021709	0.044669
Pf3D7_07_v3	605403	606690	PF3D7_0713100	Pfmc-2TM Maurer's cleft two transmembrane protein	-0.007724	0.13752	0.127302		-0.074403	-0.208189	-0.024481	-0.153066	-0.061144
Pf3D7_07_v3	606861	608035	PF3D7_0713200	exported protein family 1	-0.011368	-0.105662	-0.04669		0.019519	-0.032129	-0.048757	0.049193	-0.077632
Pf3D7_07_v3	609047	610772	PF3D7_0713300	erythrocyte membrane protein 1 (PfEMP1), pseudogene	-0.010418	-0.019533	0.004649		-0.015666	-0.005797	0.098983	-0.002297	0.001509
Pf3D7_07_v3	612208	613990	PF3D7_0713400	GPCR-like receptor SR25	-0.008386	-0.002104	-0.011715		-0.091083	-0.074616	-0.138971	-0.111621	-0.133464
Pf3D7_07_v3	614135	617499	PF3D7_0713500	conserved Plasmodium protein, unknown function	0.012235	-0.144035	-0.032882		0.00876	-0.066647	-0.127457	-0.06229	-0.088975
Pf3D7_07_v3	617683	621117	PF3D7_0713600	mitochondrial ribosomal protein S5 precursor, putative	0.011613	-0.047796	0.055263		-0.100379	-0.089703	-0.012216	-0.093459	-0.071103
Pf3D7_07_v3	621213	623771	PF3D7_0713700	conserved Plasmodium protein, unknown function	-0.000339	0.127192	0.176479		0.050308	0.023407	-0.011332	0.100876	0.174846
Pf3D7_07_v3	624129	625550	PF3D7_0713800	negative elongation factor A, putative	-0.00497	-0.066552	-0.113022		0.037693	-0.028883	0.049436	0.002058	-0.112111
Pf3D7_07_v3	626817	638026	PF3D7_0713900	conserved Plasmodium protein, unknown function	0.00081	-0.006905	0.020025		-0.032545	-0.024862	-0.085721	0.008065	-0.051496
Pf3D7_07_v3	642851	643722	PF3D7_0714000	histone H2B variant	0.040268	0.178786	0.137747		-0.198906	-0.180632	-0.038474	-0.185316	-0.2577
Pf3D7_07_v3	646469	649017	PF3D7_0714100	MAATS1 domain-containing protein, putative	-0.016148	0.036999	0.015881		-0.095657	-0.107956	-0.12976	-0.072831	-0.090849
Pf3D7_07_v3	650584	655169	PF3D7_0714200	conserved Plasmodium protein, unknown function	0.011039	-0.008316	-0.074882		-0.026258	0.014894	-0.00489	0.005158	0.012181
Pf3D7_07_v3	656621	661919	PF3D7_0714300	palmitoyltransferase DHHC4, putative	0.001891	-0.000805	0.065265		-0.052667	0.075687	0.061262	0.007319	0.044701
Pf3D7_07_v3	662034	663657	PF3D7_0714400	calmodulin, putative	-0.006841	-0.087866	-0.122234		-0.051242	-0.002738	-0.092891	0.009085	0.007138
Pf3D7_07_v3	664706	666417	PF3D7_0714500	transcription elongation factor s-II, putative	-0.002461	0.026628	-0.006178		-0.08205	0.01592	-0.136145	-0.0292	-0.106472
Pf3D7_07_v3	667735	669962	PF3D7_0714600	conserved protein, unknown function	-0.004403	0.048591	0.018348		-0.010813	0.037313	0.152026	0.07658	-0.01084
Pf3D7_07_v3	673201	674514	PF3D7_0715000	4-nitrophenylphosphatase	0.016447	-0.106585	-0.010121		-0.044221	-0.032325	-0.1207	-0.059549	-0.060936
Pf3D7_07_v3	674515	675380	PF3D7_0715100	C-Myc-binding protein, putative	0.017893	-0.008631	0.027298		0.064998	0.131006	-0.095021	0.038206	0.032665
Pf3D7_07_v3	675811	682931	PF3D7_0715200	conserved Plasmodium protein, unknown function	0.002176	-0.017161	0.041567		0.009204	0.022347	-0.065174	0.014948	0.027275
Pf3D7_07_v3	684289	686941	PF3D7_0715300	calcium/calmodulin-dependent protein kinase, putative	0.007658	-0.057221	-0.096537		0.01813	-0.02229	-0.063845	0.010837	-0.001579
Pf3D7_07_v3	687641	689098	PF3D7_0715400	secreted ookinete protein, putative	0.015732	-0.01624	0.047523		0.046583	0.000832	-0.08119	0.01915	0.017774
Pf3D7_07_v3	689293	690307	PF3D7_0715500	ATP synthase subunit epsilon, mitochondrial, putative	-0.023139	0.034499	0.109394		-0.056077	-0.002889	-0.041867	-0.010832	-0.137666
Pf3D7_07_v3	690818	693582	PF3D7_0715600	GTP-binding translation elongation factor tu family protein, putative	0.001004	-0.009095	-0.045385		-0.087819	-0.066823	-0.074475	-0.047008	-0.047083
Pf3D7_07_v3	694273	695132	PF3D7_0715700	conserved protein, unknown function	0.023694	-0.036925	0.037873		-0.114926	-0.115379	-0.027931	-0.177717	-0.070926
Pf3D7_07_v3	695350	697154	PF3D7_0715800	drug/metabolite transporter DMT1, putative	-0.020237	0.063414	0.020355		-0.017855	-0.06998	-0.043106	-0.062377	-0.030247
Pf3D7_07_v3	698989	701159	PF3D7_0715900	cation diffusion facilitator family protein, putative	-0.003135	-0.11652	-0.048219		-0.095774	-0.075661	-0.037728	-0.054749	-0.163818
Pf3D7_07_v3	702957	706834	PF3D7_0716000	RNA-binding protein, putative	0.008718	-0.035334	-0.040222		-0.073496	-0.025406	-0.027735	-0.053861	-0.042402
Pf3D7_07_v3	707449	711158	PF3D7_0716100	protein SDA1, putative	0.008015	-0.063908	-0.039111		-0.092909	-0.105796	-0.079665	-0.082832	-0.028848
Pf3D7_07_v3	712219	715217	PF3D7_0716200	PDCD2 domain-containing protein, putative	0.036982	-0.033503	-0.015092		0.015696	-0.043387	-0.042877	0.013359	0.005017
Pf3D7_07_v3	717031	719218	PF3D7_0716300	conserved protein, unknown function	0.004108	-0.020653	-0.056769		-0.00658	-0.056423	-0.128081	-0.011148	-0.013629
Pf3D7_07_v3	719760	721592	PF3D7_0716400	transcription initiation factor IIA subunit 1, putative	0.06206	-0.139439	0.011424		0.080946	-0.016746	0.140852	0.066141	0.029461
Pf3D7_07_v3	721593	724965	PF3D7_0716500	conserved Plasmodium protein, unknown function	-0.011291	0.036231	0.058505		-0.022574	0.043163	0.011344	0.007312	0.064756
Pf3D7_07_v3	725046	727469	PF3D7_0716600	cysteine desulfurase	0.017755	-0.076421	0.020672		-0.010874	-0.090368	-0.011997	-0.112083	-0.028524
Pf3D7_07_v3	727859	731376	PF3D7_0716700	conserved Plasmodium protein, unknown function	-0.012409	-0.038805	0.029572		-0.040972	-0.035666	0.034681	0.029243	-0.069216
Pf3D7_07_v3	731820	733746	PF3D7_0716800	eukaryotic translation initiation factor 3 subunit I, putative	0.007601	-0.043802	-0.025333		-0.028383	-0.006809	-0.062179	-0.024841	-0.060201
Pf3D7_07_v3	736120	737588	PF3D7_0716900	drug/metabolite transporter DMT2	0.031788	-0.076655	-0.211931		0.079394	-0.058632	0.06471	-0.082092	-0.050926
Pf3D7_07_v3	738328	741459	PF3D7_0717000	conserved Plasmodium membrane protein, unknown function	0.010424	0.043362	0.037234		-0.08674	0.018425	0.060589	0.084405	0.047504
Pf3D7_07_v3	741760	745046	PF3D7_0717100	conserved Plasmodium protein, unknown function	0.026657	-0.05936	-0.062031		-0.021212	-0.065534	-0.121471	-0.029593	-0.069747
Pf3D7_07_v3	745047	746913	PF3D7_0717200	conserved Plasmodium protein, unknown function	-0.002189	-0.147037	-0.011191		0.08547	-0.036936	-0.010993	0.006057	-0.046485
Pf3D7_07_v3	748740	750949	PF3D7_0717300	transcription initiation factor IIE subunit alpha, putative	-0.012288	0.069544	-0.006653		0.093545	0.102464	0.03626	0.05647	0.10516
Pf3D7_07_v3	751627	754382	PF3D7_0717400	queuine tRNA-ribosyltransferase, putative	-0.001042	-0.004964	0.013778		-0.07529	-0.112949	-0.101911	-0.04647	-0.028059
Pf3D7_07_v3	755513	757946	PF3D7_0717500	calcium-dependent protein kinase 4	0.004028	-0.008933	-0.011991		0.0421	0.000162	0.012079	0.009746	0.042747
Pf3D7_07_v3	758470	763127	PF3D7_0717600	conserved Plasmodium protein, unknown function	-0.027288	0.009844	0.007991		0.00717	0.015103	-0.132962	0.011806	0.025054
Pf3D7_07_v3	764544	766663	PF3D7_0717700	serine--tRNA ligase, putative	-0.00517	-0.055592	0.012115		-0.02725	-0.055308	-0.066416	-0.027058	-0.019196
Pf3D7_07_v3	767107	772199	PF3D7_0717800	conserved Plasmodium protein, unknown function	0.005582	-0.017442	0.061832		-0.113663	-0.034938	-0.045596	-0.000741	-0.000672
Pf3D7_07_v3	772701	775514	PF3D7_0717900	thioredoxin-like protein	0.006324	-0.121376	-0.009819		-0.019754	0.037577	0.040539	-0.001751	0.104645
Pf3D7_07_v3	775891	795887	PF3D7_0718000	dynein heavy chain, putative	-0.011048	-0.032938	-0.023363		-0.062462	-0.00719	-0.026838	0.046813	0.002437
Pf3D7_07_v3	796264	804989	PF3D7_0718100	exported serine/threonine protein kinase	-0.010977	-0.026096	0.033639		-0.007304	0.013323	-0.08694	-0.036581	-0.009827
Pf3D7_07_v3	812051	820885	PF3D7_0718300	cysteine repeat modular protein 2	0.012814	-0.113167	-0.035059		0.043705	0.018178	-0.081359	-0.000368	0.041229
Pf3D7_07_v3	822188	823265	PF3D7_0718400	mitochondrial ribosomal protein S8 precursor, putative	-0.019442	-0.021065	0.060748		-0.088653	0.057233	-0.080163	0.010714	0.006821
Pf3D7_07_v3	824195	826134	PF3D7_0718500	prefoldin subunit 3, putative	-0.021209	0.039368	0.083898		0.020994	0.033071	0.164437	0.011023	0.086402
Pf3D7_07_v3	826587	831427	PF3D7_0718600	conserved Plasmodium protein, unknown function	-0.014365	0.003604	-0.009045		-0.034832	0.01366	-0.055383	-0.001702	0.073334
Pf3D7_07_v3	831428	833172	PF3D7_0718700	conserved Plasmodium membrane protein, unknown function	-0.028849	-0.074925	-0.044892		-0.038126	0.029102	-0.013115	0.057217	0.023073
Pf3D7_07_v3	833380	835301	PF3D7_0718800	conserved protein, unknown function	0.012903	0.062635	0.087766		-0.01409	-0.001757	-0.117514	-0.049052	-0.011399
Pf3D7_07_v3	835707	837111	PF3D7_0718900	conserved Plasmodium protein, unknown function	0.0226	-0.098138	-0.032284		-0.000445	0.019593	-0.078553	0.009138	0.02841
Pf3D7_07_v3	837885	838793	PF3D7_0719000	conserved protein, unknown function	0.011565	-0.02306	-0.042541		-0.075591	-0.026065	-0.123413	0.069184	-0.034424
Pf3D7_07_v3	838794	840274	PF3D7_0719100	ATP synthase F0 subunit a-like protein, putative	0.009651	-0.048581	-0.086991		-0.074232	-0.075286	0.019109	0.096593	-0.028326
Pf3D7_07_v3	840858	843080	PF3D7_0719200	NIMA related kinase 4	-0.001739	-0.071966	-0.047995		-0.087347	0.018494	0.026249	-0.003049	-0.095445
Pf3D7_07_v3	844245	847843	PF3D7_0719300	actin-related protein, putative	0.018594	-0.137815	-0.118434		0.01795	0.086359	-0.035546	0.013439	0.032825
Pf3D7_07_v3	848148	853843	PF3D7_0719400	conserved Plasmodium protein, unknown function	-0.018193	0.030802	0.029438		-0.071165	0.06047	-0.00219	0.03166	0.091229
Pf3D7_07_v3	854402	856904	PF3D7_0719500	LEM3/CDC50 family protein, putative	0.031077	-0.06349	-0.054698		-0.078738	-0.095637	-0.123683	-0.090572	-0.145535
Pf3D7_07_v3	858492	859742	PF3D7_0719600	60S ribosomal protein L11a, putative	-0.007607	-0.017518	0.049101		0.054396	0.154174	0.151703	0.114234	0.122295
Pf3D7_07_v3	861333	862737	PF3D7_0719700	40S ribosomal protein S10, putative	-0.006173	-0.094489	-0.089045		-0.149196	-0.175867	-0.111651	-0.116189	-0.146799
Pf3D7_07_v3	863202	865063	PF3D7_0719800	conserved protein, unknown function	-0.002132	-0.039424	-0.083657		0.195617	0.06971	0.174499	0.065566	0.134294
Pf3D7_07_v3	865677	876382	PF3D7_0719900	conserved Plasmodium membrane protein, unknown function	-0.01083	0.027184	0.032291		0.015751	0.026545	-0.007941	0.031742	0.022882
Pf3D7_07_v3	876545	877682	PF3D7_0720000	exosome complex component CSL4, putative	0.031716	0.08478	0.164097		0.045306	0.07949	0.149588	0.120455	0.044987
Pf3D7_07_v3	877683	878882	PF3D7_0720100	pre-rRNA-processing protein ESF2, putative	-0.027437	0.042374	0.007375		-0.052103	-0.107541	-0.056157	0.042006	-0.050342
Pf3D7_07_v3	879204	880196	PF3D7_0720200	conserved protein, unknown function	0.005294	-0.177497	0.058307		-0.067391	0.052012	0.035717	0.078563	0.178025
Pf3D7_07_v3	880215	881113	PF3D7_0720300	conserved Plasmodium protein, unknown function	-0.024184	0.22215	0.119007		-0.052531	-0.035447	0.161426	0.069994	0.122834
Pf3D7_07_v3	882686	885238	PF3D7_0720400	apoptosis-inducing factor, putative	0.003128	0.015687	-0.005474		-0.024416	-0.03321	-0.00337	-0.024549	0.01226
Pf3D7_07_v3	886096	887651	PF3D7_0720500	conserved Plasmodium protein, unknown function	0.029446	-0.16515	-0.158719		0.024442	0.137171	-0.057538	0.030119	0.085493
Pf3D7_07_v3	887652	889628	PF3D7_0720600	conserved protein, unknown function	0.007538	-0.023487	0.029612		-0.040638	0.055179	0.003125	0.084014	0.033548
Pf3D7_07_v3	891433	899301	PF3D7_0720700	phosphoinositide-binding protein, putative	-0.000426	0.000196	-0.004453		-0.06161	-0.049401	-0.11541	-0.052387	-0.02777
Pf3D7_07_v3	899501	901343	PF3D7_0720800	Ham1-like protein, putative	-0.011271	-0.074124	-0.116729		0.027686	0.036201	0.060801	0.049845	0.101189
Pf3D7_07_v3	901344	903037	PF3D7_0720900	tetratricopeptide repeat protein, putative	-0.019723	-0.096873	-0.056133		-0.037779	0.028308	-0.02032	0.006084	0.067061
Pf3D7_07_v3	903893	914921	PF3D7_0721000	conserved Plasmodium membrane protein, unknown function	0.001048	0.019743	0.033026		-0.083954	-0.102619	-0.054783	-0.036637	-0.04174
Pf3D7_07_v3	916184	917418	PF3D7_0721100	conserved protein, unknown function	0.008986	-0.096659	-0.072317		-0.053014	0.007631	-0.058539	0.070407	0.013514
Pf3D7_07_v3	917708	921066	PF3D7_0721200	conserved Plasmodium protein, unknown function	-0.007556	0.049793	0.028761		0.007744	-0.045219	-0.06783	0.038115	0.01872
Pf3D7_07_v3	922035	925234	PF3D7_0721300	ATP-dependent RNA helicase DBP7, putative	0.000642	0.050872	0.044474		0.007628	0.030817	0.064325	-0.037746	0.012315
Pf3D7_07_v3	926442	928271	PF3D7_0721400	rhoptry protein, putative	-0.011452	0.033895	0.036848		-0.059638	0.009545	-0.051267	0.096124	0.043709
Pf3D7_07_v3	928272	931103	PF3D7_0721500	conserved Plasmodium membrane protein, unknown function	0.033558	-0.068689	-0.163977		0.009558	-0.07487	-0.032604	-0.057385	0.019136
Pf3D7_07_v3	931209	932414	PF3D7_0721600	40S ribosomal protein S5, putative	0.035681	0.008517	0.076475		0.019112	-0.041249	0.002974	0.095524	-0.004027
Pf3D7_07_v3	935247	937150	PF3D7_0721700	secreted ookinete protein, putative	0.01477	-0.106692	-0.088988		0.000111	0.021291	0.074209	-0.034985	0.068136
Pf3D7_07_v3	938029	939145	PF3D7_0721800	conserved Plasmodium protein, unknown function	-0.045957	0.042583	0.076435		-0.062778	-0.103023	-0.140068	-0.187736	-0.100756
Pf3D7_07_v3	939465	940500	PF3D7_0721900	V-type ATPase V0 subunit e, putative	-0.007483	0.034774	-0.012656		-0.082721	-0.143672	-0.023022	0.020402	-0.17968
Pf3D7_07_v3	941526	942763	PF3D7_0722000	conserved Plasmodium protein, unknown function	-0.007658	-0.130699	-0.192606		-0.078219	-0.104325	-0.179422	-0.097848	-0.104685
Pf3D7_07_v3	943773	945484	PF3D7_0722100	protein pelota homolog, putative	-0.017586	-0.004541	-0.017746		-0.0523	-0.098476	0.041138	0.031833	0.018476
Pf3D7_07_v3	946113	948862	PF3D7_0722200	rhoptry-associated leucine zipper-like protein 1	-0.008348	0.038117	0.043408		-0.139151	-0.1041	0.021968	0.016947	0.006533
Pf3D7_07_v3	949199	953364	PF3D7_0722300	ubiquitin carboxyl-terminal hydrolase, putative	-0.00579	0.02158	0.03747		-0.076902	-0.112581	-0.049247	-0.035387	-0.031644
Pf3D7_07_v3	954534	956593	PF3D7_0722400	Obg-like ATPase 1, putative	0.034572	-0.16459	-0.066303		-0.126924	-0.142124	-0.071745	-0.037093	-0.157402
Pf3D7_07_v3	956670	958267	PF3D7_0722500	pre-mRNA-splicing factor CWC15, putative	-0.012247	0.086586	0.112566		-0.009005	0.01819	0.086009	0.040902	0.043517
Pf3D7_07_v3	958636	960944	PF3D7_0722600	U3 small nucleolar RNA-associated protein 7, putative	0.013141	-0.078317	-0.066368		0.035489	0.046557	-0.048272	-0.017171	0.052386
Pf3D7_07_v3	961781	962697	PF3D7_0722700	conserved protein, unknown function	0.01447	-0.014801	0.005687		-0.166235	-0.056979	0.029819	0.038273	-0.095543
Pf3D7_07_v3	963120	965359	PF3D7_0722800	conserved protein, unknown function	0.010196	0.010983	-0.002009		-0.007263	0.092022	-0.022338	0.018077	0.105425
Pf3D7_07_v3	965414	968032	PF3D7_0722900	conserved protein, unknown function	-0.014142	0.031742	-0.029786		0.048469	0.11265	-0.06293	0.053039	0.15589
Pf3D7_07_v3	968586	969985	PF3D7_0723000	tRNAHis guanylyltransferase, putative	0.00266	-0.099656	-0.020493		0.016487	-0.098554	-0.167019	-0.025291	-0.046708
Pf3D7_07_v3	970242	972127	PF3D7_0723100	protein CPH1, putative	0.003572	-0.01557	-0.012845		0.123683	0.074473	0.03831	0.059931	0.102743
Pf3D7_07_v3	972408	974522	PF3D7_0723200	conserved Plasmodium protein, unknown function	0.001207	-0.054484	0.043647		-0.054262	-0.048479	-0.092449	0.036917	-0.1015
Pf3D7_07_v3	975516	978658	PF3D7_0723300	conserved protein, unknown function	0.033896	0.052644	0.144013		0.007763	-0.070696	0.01966	0.014956	-0.082743
Pf3D7_07_v3	978670	983438	PF3D7_0723400	conserved Plasmodium protein, unknown function	-0.009908	-0.059096	-0.001259		-0.029476	-0.084562	-0.065427	-0.080065	-0.020116
Pf3D7_07_v3	984528	985708	PF3D7_0723500	dynactin subunit 5, putative	-0.018107	-0.09024	0.026882		-0.050101	-0.071755	-0.112313	0.025901	-0.078568
Pf3D7_07_v3	986348	987615	PF3D7_0723600	proteasome assembly chaperone 4, putative	-0.037496	-0.099634	-0.040243		0.029902	0.183147	0.139299	0.082491	0.081969
Pf3D7_07_v3	987895	991493	PF3D7_0723700	metallo-hydrolase/oxidoreductase, putative	0.005961	-0.036576	-0.048074		-0.059003	-0.068836	-0.05563	-0.017709	-0.039276
Pf3D7_07_v3	992982	1000467	PF3D7_0723800	conserved Plasmodium protein, unknown function	-0.026509	0.014922	0.089891		-0.04898	-0.044232	-0.052011	-0.04932	-0.017258
Pf3D7_07_v3	1000468	1004996	PF3D7_0723900	RNA-binding protein, putative	0.007722	-0.039448	-0.028348		-0.073651	-0.006039	-0.00513	-0.012921	-0.068706
Pf3D7_07_v3	1006085	1012395	PF3D7_0724000	Rab GTPase activator and protein kinase, putative	0.016541	-0.008479	-0.005343		-0.064073	-0.069186	0.085907	-0.029064	-0.063815
Pf3D7_07_v3	1013045	1016699	PF3D7_0724100	conserved Plasmodium protein, unknown function	-0.014426	-0.08207	-0.064389		-0.020481	-0.007696	0.091115	-0.070637	-0.016444
Pf3D7_07_v3	1019134	1020917	PF3D7_0724200	type 2A phosphatase-associated protein 42, putative	-0.024855	-0.058368	-0.049609		-0.125971	-0.120147	0.074268	-0.061408	-0.079489
Pf3D7_07_v3	1021258	1022880	PF3D7_0724300	ubiquinone biosynthesis O-methyltransferase, putative	0.009368	-0.16808	-0.118353		-0.057141	-0.078491	0.038417	0.013386	-0.075252
Pf3D7_07_v3	1023401	1024371	PF3D7_0724400	mitochondrial import inner membrane translocase subunit TIM14, putative	-0.051663	0.087826	0.11895		0.215957	0.153608	0.058362	0.06559	0.161084
Pf3D7_07_v3	1024422	1026305	PF3D7_0724500	conserved Plasmodium protein, unknown function	-0.020544	-0.020657	0.076354		0.006027	0.053952	0.052775	-0.023577	0.016733
Pf3D7_07_v3	1026306	1033327	PF3D7_0724600	protein kinase, putative	0.009503	-0.046162	-0.022699		-0.051762	-0.072279	-0.038188	-0.040348	-0.037542
Pf3D7_07_v3	1034719	1046359	PF3D7_0724700	conserved Plasmodium protein, unknown function	0.007566	-0.006046	-0.038693		-0.019802	-0.016908	-0.020139	-0.009938	-0.030122
Pf3D7_07_v3	1047177	1049612	PF3D7_0724800	kelch domain-containing protein, putative	0.017222	0.010265	0.005801		-0.088158	-0.032215	-0.044798	-0.045756	-0.075346
Pf3D7_07_v3	1052215	1058408	PF3D7_0724900	kinesin-19, putative	-0.001286	0.021453	-0.001449		-0.045909	-0.03489	-0.020041	-0.052918	0.043842
Pf3D7_07_v3	1058683	1063226	PF3D7_0725000	exonuclease I, putative	0.001951	-0.040059	-0.055606		0.03472	0.010934	0.019693	-0.010088	0.071401
Pf3D7_07_v3	1065002	1070490	PF3D7_0725100	conserved Plasmodium membrane protein, unknown function	0.020358	-0.024504	0.024191		-0.03032	-0.105808	0.016462	-0.070568	-0.021209
Pf3D7_07_v3	1070730	1071969	PF3D7_0725200	mago nashi protein homologue, putative	0.030396	0.003907	0.001012		-0.01779	-0.000862	0.04936	0.055529	0.115066
Pf3D7_07_v3	1071970	1075004	PF3D7_0725300	conserved protein, unknown function	-0.002684	-0.013891	-0.042898		-0.037376	-0.005832	0.024478	0.022375	-0.007032
Pf3D7_07_v3	1078765	1080305	PF3D7_0725400	conserved Plasmodium protein, unknown function	-0.021316	0.081887	0.193585		-0.084061	0.092199	0.038179	0.054468	0.017236
Pf3D7_07_v3	1083511	1085847	PF3D7_0725600	18S ribosomal RNA	0.041988	0.022599	-0.179702		-0.339419	-0.416569	-0.16651	-0.024999	-0.441829
Pf3D7_07_v3	1086570	1090607	PF3D7_0726000	28S ribosomal RNA	0.064877	-0.169076	-0.00231		-0.046596	-0.203286	-0.053064	0.037008	-0.155292
Pf3D7_07_v3	1093316	1096372	PF3D7_0726100	Plasmodium exported protein, unknown function	0.009222	-0.04538	-0.006471		0.062192	0.04525	0.054739	0.041268	0.038578
Pf3D7_07_v3	1099884	1103217	PF3D7_0726200	serine/threonine protein kinase, FIKK family	0.032217	0.038214	-0.035647		-0.045814	0.040283	-0.027348	0.014842	0.035635
Pf3D7_07_v3	1103906	1108597	PF3D7_0726300	DNA mismatch repair protein PMS1, putative	0.001563	-0.034227	0.011419		-0.044474	0.018651	-0.02921	-0.009119	-0.001922
Pf3D7_07_v3	1108598	1124742	PF3D7_0726400	conserved Plasmodium membrane protein, unknown function	0.011525	0.023022	0.016438		0.02488	0.073009	-0.060133	0.003239	0.037086
Pf3D7_07_v3	1126306	1136827	PF3D7_0726500	ubiquitin carboxyl-terminal hydrolase, putative	0.012332	0.041537	0.027491		-0.038595	0.070144	-0.012663	0.058834	0.042363
Pf3D7_07_v3	1140229	1143004	PF3D7_0726600	conserved Plasmodium protein, unknown function	-0.004228	-0.026394	0.044034		0.029825	0.161123	-0.003847	0.028493	0.07095
Pf3D7_07_v3	1145398	1147388	PF3D7_0726900	mitochondrial import inner membrane translocase subunit TIM50, putative	-0.035501	0.083268	0.049853		0.025101	0.041933	-0.032633	-0.034649	-0.014649
Pf3D7_07_v3	1147389	1151308	PF3D7_0727000	vacuolar protein sorting-associated protein 53, putative	-0.019454	0.012266	0.030909		0.008587	0.081348	-0.04476	0.021182	0.068613
Pf3D7_07_v3	1151905	1155605	PF3D7_0727100	conserved protein, unknown function	0.002408	0.040222	0.092934		-0.043651	0.001886	-0.012026	0.001157	-0.009955
Pf3D7_07_v3	1156498	1158659	PF3D7_0727200	cysteine desulfurase, putative	0.004631	0.001109	-0.015581		-0.083158	-0.064694	-0.020665	-0.006797	-0.01204
Pf3D7_07_v3	1159450	1162070	PF3D7_0727300	DNA (cytosine-5)-methyltransferase	-0.038097	0.070996	0.029607		0.03312	0.013835	-0.043338	-0.035565	-0.017707
Pf3D7_07_v3	1162460	1164081	PF3D7_0727400	proteasome subunit alpha type-5, putative	0.00555	0.027446	-0.050799		-0.048958	-0.037049	-0.201608	0.043597	-0.051165
Pf3D7_07_v3	1164205	1166828	PF3D7_0727500	mTERF domain-containing protein, putative	-0.062399	0.157075	0.097982		0.079134	0.061116	0.02866	-0.046837	0.054013
Pf3D7_07_v3	1167191	1171051	PF3D7_0727600	conserved Plasmodium protein, unknown function	0.01697	-0.046507	-0.096764		0.051602	0.032952	-0.095662	-0.035655	0.033188
Pf3D7_07_v3	1171052	1174406	PF3D7_0727700	conserved Plasmodium protein, unknown function	0.003954	-0.030792	-0.109765		0.038354	0.049103	0.067886	0.03443	0.064161
Pf3D7_07_v3	1175694	1181950	PF3D7_0727800	cation transporting ATPase, putative	-0.019947	-0.004419	0.031357		-0.001461	0.040234	-0.002257	-0.010935	0.074078
Pf3D7_07_v3	1184151	1190422	PF3D7_0727900	conserved Plasmodium protein, unknown function	-0.002433	0.013902	0.04316		-0.048325	-0.02466	-0.046104	-0.009053	0.033958
Pf3D7_07_v3	1190929	1192539	PF3D7_0728000	eukaryotic translation initiation factor 2 subunit alpha	-0.007703	-0.074466	0.017776		-0.003717	0.021317	0.014216	0.042037	0.076421
Pf3D7_07_v3	1193366	1210551	PF3D7_0728100	conserved Plasmodium membrane protein, unknown function	-0.004069	0.033445	0.030999		-0.024932	0.035284	-0.03647	0.036785	0.005325
Pf3D7_07_v3	1211407	1213679	PF3D7_0728200	actin-like protein, putative	0.021135	-0.03014	-0.063204		-0.100697	-0.0657	-0.025257	-0.028866	-0.086738
Pf3D7_07_v3	1213680	1214726	PF3D7_0728300	conserved protein, unknown function	-0.051162	-0.127845	0.066432		-0.041406	-0.065446	-0.005633	-0.003519	0.018106
Pf3D7_07_v3	1215926	1217451	PF3D7_0728500	conserved Plasmodium protein, unknown function	-0.030406	-0.102324	0.068343		0.156369	0.257649	0.1232	0.175145	0.074445
Pf3D7_07_v3	1218176	1225723	PF3D7_0728600	RING zinc finger protein, putative	-0.004814	0.007052	0.035568		0.002369	0.011497	0.034195	0.037137	0.083345
Pf3D7_07_v3	1225779	1228964	PF3D7_0728700	alpha/beta hydrolase, putative	0.015651	0.031586	-0.0046		-0.104257	-0.11546	-0.03979	-0.002063	-0.066509
Pf3D7_07_v3	1230339	1232226	PF3D7_0728800	conserved Plasmodium protein, unknown function	-0.014998	-0.034016	0.002088		-0.167203	-0.111764	-0.02165	-0.029801	-0.146667
Pf3D7_07_v3	1232227	1234922	PF3D7_0728900	RNA-binding protein, putative	-0.016819	-0.067866	0.000242		-0.03828	-0.064285	0.064544	0.019445	0.011067
Pf3D7_07_v3	1235449	1236957	PF3D7_0729000	signal recognition particle subunit SRP9	-0.014033	0.09664	0.112961		-0.034571	0.084695	0.129062	0.163897	0.081037
Pf3D7_07_v3	1238196	1246438	PF3D7_0729100	conserved Plasmodium protein, unknown function	-0.012533	0.002932	-0.009612		0.007684	-0.012446	0.088315	-0.01088	-0.005405
Pf3D7_07_v3	1247148	1248514	PF3D7_0729200	1-cys peroxiredoxin	0.008953	0.071749	0.207601		-0.128675	-0.184927	-0.0692	-0.039161	-0.052987
Pf3D7_07_v3	1248587	1251753	PF3D7_0729300	60S ribosomal export protein NMD3, putative	0.007563	0.007434	-0.025121		-0.040698	0.008175	0.013019	0.005884	-0.053255
Pf3D7_07_v3	1252597	1254347	PF3D7_0729400	ribosome biogenesis protein BRX1, putative	0.01359	-0.084992	-0.21404		-0.094437	-0.147014	-0.040595	-0.075334	-0.081625
Pf3D7_07_v3	1255121	1257903	PF3D7_0729500	mRNA (N6-adenosine)-methyltransferase, putative	-0.00126	0.050193	-0.093319		-0.028257	-0.03854	-0.044829	-0.05914	-0.007969
Pf3D7_07_v3	1258537	1259942	PF3D7_0729600	conserved Plasmodium protein, unknown function	-0.017816	-0.011726	-0.024303		-0.032741	-0.08539	0.041406	0.10567	0.001167
Pf3D7_07_v3	1259943	1263030	PF3D7_0729700	conserved protein, unknown function	-0.012533	-0.063025	-0.071258		0.039303	0.022843	0.019255	-0.021881	0.085487
Pf3D7_07_v3	1265660	1281566	PF3D7_0729900	dynein heavy chain, putative	-0.017098	0.071315	0.044395		0.036797	0.019918	-0.021068	0.015652	0.032556
Pf3D7_07_v3	1282663	1285769	PF3D7_0730100	tRNA pseudouridine synthase D, putative	-0.014978	0.033561	-0.015226		-0.033919	-0.022774	-0.091397	-0.044968	0.03149
Pf3D7_07_v3	1285807	1289649	PF3D7_0730200	AP-4 complex subunit beta, putative	-0.013936	-0.025081	-0.005567		-0.012917	-0.08033	-0.076679	-0.022455	-0.009487
Pf3D7_07_v3	1297209	1301704	PF3D7_0730300	AP2 domain transcription factor AP2-L, putative	0.001657	0.067604	0.078773		-0.00885	0.052811	-0.009002	-0.001302	0.066634
Pf3D7_07_v3	1304097	1305346	PF3D7_0730400	IMP1-like protein, putative	0.013961	-0.048943	0.003322		0.005004	-0.03866	0.113151	0.030191	0.030288
Pf3D7_07_v3	1305644	1314465	PF3D7_0730500	conserved Plasmodium protein, unknown function	0.027419	0.00651	-0.037237		-0.002634	-0.034692	-0.038975	0.022979	-0.026287
Pf3D7_07_v3	1321056	1322617	PF3D7_0730800	Plasmodium exported protein, unknown function, unspecified product	-0.00854	-0.02107	-0.027116		0.020763	-0.053106	0.141271	-0.006539	-0.0051
Pf3D7_07_v3	1325125	1332063	PF3D7_0730900	EMP1-trafficking protein	0.010695	-0.110206	-0.123775		0.063418	-0.026722	0.029519	-0.043197	-0.012842
Pf3D7_07_v3	1332925	1335188	PF3D7_0731000	unspecified product	0.005483	-0.012477	-0.012516		-0.041791	-0.000699	-0.072479	-0.146612	0.02819
Pf3D7_07_v3	1338709	1342040	PF3D7_0731100	EMP1-trafficking protein	0.011827	0.045816	0.045285		0.006029	-0.071461	-0.009598	-0.076502	-0.10151
Pf3D7_07_v3	1342592	1344246	PF3D7_0731200	Plasmodium exported protein, unknown function	0.024904	-0.01256	-0.120366		-0.153183	0.039344	-0.093132	-0.100367	-0.025067
Pf3D7_07_v3	1349782	1351399	PF3D7_0731300	Plasmodium exported protein (PHISTb), unknown function	0.045344	0.074436	-0.127429		0.041122	0.044855	0.014967	0.059456	0.016223
Pf3D7_07_v3	1353508	1355732	PF3D7_0731400	serine/threonine protein kinase, FIKK family, pseudogene	0.039127	-0.053471	-0.039734		0.011035	-0.120179	0.078216	-0.077637	-0.08274
Pf3D7_07_v3	1357805	1363179	PF3D7_0731500	erythrocyte binding antigen-175	0.01755	0.01875	0.004428		-0.031848	-0.028565	0.070272	-0.036223	-0.013356
Pf3D7_07_v3	1367911	1370846	PF3D7_0731600	acyl-CoA synthetase	-0.001528	-0.105884	-0.183361		0.008131	-0.024027	0.086704	-0.087988	-0.028157
Pf3D7_07_v3	1371813	1373010	PF3D7_0731700	Plasmodium exported protein (hyp9), unknown function	0.001269	-0.071815	-0.043361		-0.083212	-0.015384	0.13652	-0.066112	-0.018246
Pf3D7_07_v3	1378368	1381019	PF3D7_0731800	alpha/beta hydrolase, putative	-0.014211	0.074381	0.019033		0.021005	-0.028277	0.035954	-0.043508	-0.038259
Pf3D7_08_v3	79573	80892	PF3D7_0800800	Plasmodium exported protein (hyp7), unknown function	0.000219	0.247327	0.230139		-0.000134	-0.052989	0.331198	0.091881	-0.22359
Pf3D7_08_v3	82878	84154	PF3D7_0800900	Plasmodium exported protein (hyp7), unknown function, pseudogene	0.055806	0.150838	0.177889		-0.061225	-0.052051	0.053069	0.086695	0.044251
Pf3D7_08_v3	84318	88672	PF3D7_0801000	Plasmodium exported protein (PHISTc), unknown function	0.01567	0.129012	0.085354		-0.050943	-0.006811	0.104522	-0.009327	-0.053941
Pf3D7_08_v3	91147	97821	PF3D7_0801100	28S ribosomal RNA	0.002925	0.084247	0.107464		-0.013342	-0.052243	-0.065406	-0.056821	-0.054827
Pf3D7_08_v3	98640	99301	PF3D7_0801200	5.8S ribosomal RNA	-0.032	0.067148	0.058016		-0.043672	-0.130134	-0.064777	-0.016657	-0.050608
Pf3D7_08_v3	101704	103076	PF3D7_0801300	von Willebrand factor A domain-related protein	-0.022784	-0.041151	0.010181		0.015436	0.042299	0.030568	0.024474	0.049228
Pf3D7_08_v3	104275	105138	PF3D7_0801400	conserved Plasmodium protein, unknown function	0.014077	-0.019336	0.056903		0.004361	-0.070866	-0.092163	-0.093709	-0.138755
Pf3D7_08_v3	106343	108492	PF3D7_0801500	nucleolar protein 10, putative	0.046688	0.08306	0.04489		-0.048773	-0.073683	0.032734	-0.121838	-0.057324
Pf3D7_08_v3	108930	109807	PF3D7_0801600	conserved protein, unknown function	0.002091	-0.106793	-0.007527		0.102938	0.060769	-0.094208	-0.018334	0.177778
Pf3D7_08_v3	112049	118127	PF3D7_0801700	sentrin-specific protease 2, putative	-0.020281	-0.099818	0.024353		-0.014399	-0.02602	-0.003597	0.035849	0.005312
Pf3D7_08_v3	118782	122317	PF3D7_0801800	mannose-6-phosphate isomerase, putative	0.00032	0.013968	0.018878		0.025579	-0.018559	-0.000235	-0.037157	-0.056772
Pf3D7_08_v3	128599	143087	PF3D7_0801900	lysine-specific histone demethylase, putative	0.003698	-0.018722	-0.021398		-0.0273	-0.106418	-0.04122	-0.031051	-0.069117
Pf3D7_08_v3	145839	150532	PF3D7_0802000	glutamate dehydrogenase, putative	-0.011478	-0.030471	0.011807		-0.021998	-0.042573	-0.033665	-0.045971	-0.016994
Pf3D7_08_v3	151558	159918	PF3D7_0802100	AP2 domain transcription factor, putative	-0.019108	-0.022256	0.060275		-0.018743	-0.074613	-0.096269	-0.100089	-0.030797
Pf3D7_08_v3	165166	166328	PF3D7_0802200	1-cys peroxiredoxin	0.075494	-0.153641	-0.0441		-0.059989	-0.042611	0.074951	-0.048895	-0.018035
Pf3D7_08_v3	166819	170684	PF3D7_0802300	periodic tryptophan protein 2, putative	0.000991	-0.037021	-0.009535		-0.05778	-0.058914	-0.080969	-0.031176	-0.010832
Pf3D7_08_v3	171615	174516	PF3D7_0802400	conserved Plasmodium protein, unknown function	0.008647	-0.096149	-0.009563		0.0263	-0.083692	-0.05988	-0.008939	-0.012816
Pf3D7_08_v3	174517	179156	PF3D7_0802500	inositol 5-phosphatase, putative	0.008391	-0.02546	0.005714		-0.075601	-0.114985	-0.069782	-0.062126	-0.058629
Pf3D7_08_v3	180313	188339	PF3D7_0802600	adenylyl cyclase beta	-0.004001	-0.018045	-0.022575		0.003693	-0.027668	-0.008434	-0.026522	0.015043
Pf3D7_08_v3	188340	190566	PF3D7_0802700	conserved Plasmodium protein, unknown function	0.003278	-0.172354	-0.124894		0.086121	0.043962	-0.104022	-0.058135	0.087296
Pf3D7_08_v3	191726	194353	PF3D7_0802800	serine/threonine protein phosphatase 2B catalytic subunit A	-0.010248	-0.11213	-0.030076		0.007337	-0.073201	0.020128	-0.05445	-0.053994
Pf3D7_08_v3	194898	195928	PF3D7_0802900	conserved Plasmodium protein, unknown function	-0.02519	-0.041826	-0.060736		0.068621	0.070321	0.011316	0.061154	0.027823
Pf3D7_08_v3	196331	198864	PF3D7_0803000	peptidyl-prolyl cis-trans isomerase	0.00152	-0.030449	0.013547		-0.062618	-0.084675	0.055709	-0.022119	-0.067174
Pf3D7_08_v3	198931	203168	PF3D7_0803100	U3 small nucleolar RNA-associated protein 14, putative	-0.00692	-0.137328	0.000287		-0.055829	-0.041994	0.028097	-0.032343	-0.005245
Pf3D7_08_v3	203991	206911	PF3D7_0803200	filament assembling protein, putative	-0.026561	0.014329	0.086402		-0.06044	-0.029007	0.009687	-0.07011	0.059084
Pf3D7_08_v3	208201	210541	PF3D7_0803300	mitogen-activated protein kinase organizer 1, putative	-0.008875	0.006732	0.038123		0.010139	-0.028438	-0.038124	-0.055327	-0.011391
Pf3D7_08_v3	212002	216221	PF3D7_0803400	DNA repair and recombination protein RAD54, putative	0.003892	0.011911	0.050435		-0.064243	-0.03706	-0.096529	-0.025681	-0.048689
Pf3D7_08_v3	217638	222541	PF3D7_0803500	AAA family ATPase, putative	0.01632	0.032124	0.048043		-0.064062	-0.048833	-0.001832	0.002794	-0.060409
Pf3D7_08_v3	223512	230459	PF3D7_0803600	conserved Plasmodium protein, unknown function	-0.000257	-0.017201	0.010927		-0.030957	0.017552	-0.06878	0.05003	-0.035874
Pf3D7_08_v3	231148	233006	PF3D7_0803700	tubulin gamma chain	-0.004523	-0.128017	-0.015202		-0.000727	0.048218	-0.122481	0.02315	-0.051866
Pf3D7_08_v3	233217	234676	PF3D7_0803800	proteasome subunit beta type-4	0.020132	0.033961	0.085127		0.000244	0.054795	-0.004022	0.188129	0.032495
Pf3D7_08_v3	237603	241298	PF3D7_0804000	cactin homolog, putative	0.017288	-0.116948	-0.02073		0.010146	0.003291	0.003434	0.041408	0.01849
Pf3D7_08_v3	241853	245025	PF3D7_0804300	zinc finger protein, putative	0.001792	-0.078613	0.010131		-0.038784	-0.023084	-0.049067	-0.0688	-0.021068
Pf3D7_08_v3	245461	248183	PF3D7_0804400	methionine aminopeptidase 1c, putative	0.009725	-0.015235	-0.020589		-0.041726	0.020652	-0.148402	-0.028732	0.028181
Pf3D7_08_v3	249833	268646	PF3D7_0804500	conserved Plasmodium membrane protein, unknown function	-0.006307	0.045876	0.042372		-0.046638	-0.015295	0.005761	0.05177	0.021508
Pf3D7_08_v3	268647	270946	PF3D7_0804600	tRNA pseudouridine synthase, putative	-0.011507	-0.121122	0.014354		-0.120273	-0.091708	0.009761	-0.005088	-0.008857
Pf3D7_08_v3	271167	277663	PF3D7_0804700	conserved Plasmodium protein, unknown function	-0.032911	-0.032974	0.029359		-0.020979	0.016614	-0.038478	0.033484	0.090186
Pf3D7_08_v3	278131	279284	PF3D7_0804800	peptidyl-prolyl cis-trans isomerase	0.026051	-0.070564	-0.092314		-0.074519	-0.054963	-0.136355	-0.011839	0.029166
Pf3D7_08_v3	279461	281436	PF3D7_0804900	GTPase-activating protein, putative	-0.012868	-0.024968	0.095084		-0.028128	-0.013287	-0.039621	-0.007221	0.003827
Pf3D7_08_v3	282816	284772	PF3D7_0805000	alpha/beta hydrolase, putative	-0.020606	-0.001403	0.050972		-0.125526	0.022836	0.024792	-0.001942	0.015553
Pf3D7_08_v3	286709	288870	PF3D7_0805100	conserved protein, unknown function	0.005677	-0.1194	-0.069745		-0.018033	-0.04635	-0.058329	-0.068867	0.012905
Pf3D7_08_v3	290652	291433	PF3D7_0805200	gamete release protein, putative	0.025675	-0.13742	-0.088209		-0.152349	-0.092237	-0.103439	-0.033345	-0.005604
Pf3D7_08_v3	292863	297121	PF3D7_0805300	conserved Plasmodium protein, unknown function	0.025251	-0.212795	-0.128743		0.042061	-0.034159	-0.042545	-0.032505	0.047218
Pf3D7_08_v3	303120	304846	PF3D7_0805400	N-acetyltransferase, GNAT family, putative	0.012918	-0.106791	0.049286		-0.054267	-0.051338	-0.125467	0.008102	8.2e-05
Pf3D7_08_v3	305045	308799	PF3D7_0805500	conserved Plasmodium protein, unknown function	0.027054	-0.088314	0.016275		-0.076391	-0.045845	-0.087138	-0.00119	-0.003936
Pf3D7_08_v3	311784	313210	PF3D7_0805600	PAP2-like protein, putative	-0.004735	-0.11745	-0.14531		-0.062945	-0.142767	-0.231981	-0.031027	-0.095326
Pf3D7_08_v3	313922	318976	PF3D7_0805700	serine/threonine protein kinase, FIKK family	0.001998	-0.094325	0.009148		0.031749	0.007096	-0.035314	-0.008714	0.075958
Pf3D7_08_v3	322117	323927	PF3D7_0805800	conserved Plasmodium protein, unknown function	0.009074	-0.106127	-0.025125		-0.015108	-0.006443	-0.008034	0.039585	0.087483
Pf3D7_08_v3	324029	325905	PF3D7_0805900	conserved protein, unknown function	0.032967	-0.110057	-0.095676		0.0119	0.030916	0.038129	0.099099	0.121845
Pf3D7_08_v3	325965	330254	PF3D7_0806000	AAA family ATPase, putative	0.012442	0.020393	-0.051868		-0.144699	-0.091718	-0.046783	-0.041975	-0.084077
Pf3D7_08_v3	330401	332928	PF3D7_0806100	conserved Plasmodium protein, unknown function	-0.030368	-0.07896	-0.066253		-0.004437	0.024583	-0.07165	-0.049914	-0.028428
Pf3D7_08_v3	333129	337814	PF3D7_0806200	Dpy-19-like C-mannosyltransferase, putative	-0.016107	0.038038	0.080976		0.008248	0.04181	-0.098183	0.02211	0.08174
Pf3D7_08_v3	337815	343504	PF3D7_0806300	ferlin-like protein, putative	0.003938	-0.029204	0.003194		0.003816	0.048016	-0.112289	0.017777	0.057759
Pf3D7_08_v3	344038	345071	PF3D7_0806400	UDP-N-acetylglucosamine transferase subunit ALG13, putative	0.038861	0.095679	0.139758		-0.02586	-0.052993	-0.135748	0.024011	-0.06619
Pf3D7_08_v3	345177	347704	PF3D7_0806500	DnaJ protein, putative	0.008287	0.025042	0.123021		-0.024402	0.027021	0.009314	0.053966	0.056577
Pf3D7_08_v3	349067	353612	PF3D7_0806600	kinesin-like protein, putative	0.01417	0.022321	0.093062		-0.011386	-0.002597	-0.084032	-0.040152	0.071111
Pf3D7_08_v3	354222	362646	PF3D7_0806700	conserved Plasmodium membrane protein, unknown function	0.016668	-0.046294	0.022117		-0.065586	-0.050724	-0.096225	-0.037134	0.002627
Pf3D7_08_v3	363010	366671	PF3D7_0806800	V-type proton ATPase subunit a, putative	0.013527	0.00555	0.018887		-0.017894	-0.009954	-0.008771	-0.050232	0.01436
Pf3D7_08_v3	368357	369996	PF3D7_0806900	conserved protein, unknown function	0.013342	-0.17176	-0.068688		0.091679	0.097052	-0.027964	0.056725	0.16601
Pf3D7_08_v3	370534	372762	PF3D7_0807000	YEATS domain-containing protein, putative	0.007898	-0.145929	-0.1268		0.094702	0.128752	0.060034	0.095859	0.110817
Pf3D7_08_v3	372763	377117	PF3D7_0807100	DNA helicase PSH3	0.004405	-0.250942	-0.056385		-0.142073	-0.247634	-0.06312	-0.059521	-0.241423
Pf3D7_08_v3	377774	379696	PF3D7_0807200	conserved Plasmodium membrane protein, unknown function	0.023795	-0.030484	-0.039749		-0.064138	-0.069056	-0.002978	0.009955	-0.041129
Pf3D7_08_v3	381314	383097	PF3D7_0807300	ras-related protein Rab-18	0.045842	-0.052729	-0.04105		-0.040541	-0.08529	-0.075275	0.022132	0.069477
Pf3D7_08_v3	384048	386047	PF3D7_0807400	coenzyme Q-binding protein COQ10 homolog, mitochondrial	-0.002944	-0.018451	-0.06537		0.007232	0.067496	0.052197	0.023749	0.032958
Pf3D7_08_v3	386969	388614	PF3D7_0807500	proteasome subunit alpha type-6, putative	0.001138	-0.100859	0.060461		0.065252	-0.023848	-0.061403	-0.038485	0.062685
Pf3D7_08_v3	389346	394509	PF3D7_0807600	conserved Plasmodium protein, unknown function	-0.002748	-0.000725	0.024367		-0.024096	-0.011015	-0.018278	0.025284	0.012135
Pf3D7_08_v3	395398	399037	PF3D7_0807700	serine protease DegP	0.0077	-0.062223	-0.069068		-0.050929	-0.049224	-0.070717	0.033324	0.029414
Pf3D7_08_v3	399341	401610	PF3D7_0807800	26S proteasome regulatory subunit RPN10, putative	-0.029349	0.023234	0.020768		-0.01878	0.052607	0.124703	0.081174	-0.040247
Pf3D7_08_v3	402345	404391	PF3D7_0807900	tyrosine--tRNA ligase	-0.016272	0.042375	0.102081		-0.004693	0.006455	-0.010543	0.033909	0.062253
Pf3D7_08_v3	404746	409334	PF3D7_0808000	conserved Plasmodium protein, unknown function	-0.013123	-0.041686	-0.008997		0.028217	0.065643	-0.064168	0.034134	0.054602
Pf3D7_08_v3	409686	415418	PF3D7_0808100	AP-3 complex subunit delta, putative	0.009258	0.075556	0.073201		-0.068688	-0.054677	0.003475	0.002077	-0.033176
Pf3D7_08_v3	416094	418315	PF3D7_0808200	plasmepsin X	0.001762	-7e-05	0.022905		0.013397	0.0442	0.020098	0.004184	0.05857
Pf3D7_08_v3	421243	422890	PF3D7_0808300	ubiquitin regulatory protein, putative	-0.010337	-0.122696	-0.08853		-0.035489	0.030061	0.120977	0.025004	-0.027054
Pf3D7_08_v3	423277	424786	PF3D7_0808400	coatomer subunit epsilon, putative	-0.034283	0.027383	0.110957		0.036424	0.077873	-0.015855	0.041944	0.007481
Pf3D7_08_v3	467693	472143	PF3D7_0809200	asparagine-rich antigen Pfa55-14	0.007265	0.013607	-0.086672		-0.080581	0.009999	-0.072747	-0.005036	-0.002852
Pf3D7_08_v3	474003	475429	PF3D7_0809300	unspecified product	0.066723	0.135396	0.080165		-0.047324	-0.047308	0.097585	-0.023269	-0.071333
Pf3D7_08_v3	475430	478318	PF3D7_0809400	conserved protein, unknown function	0.004067	-0.008769	-0.132894		-0.100095	-0.015282	-0.069786	-0.051469	-0.066404
Pf3D7_08_v3	478319	479076	PF3D7_0809500	histone acetyltransferase subunit NuA4, putative	-0.014886	0.233394	0.327654		-0.249563	0.028882	-0.016362	-0.002207	-0.038678
Pf3D7_08_v3	479730	497632	PF3D7_0809600	peptidase family C50, putative	0.008357	-0.026051	0.011241		-0.019932	-0.008178	-0.009652	0.015137	-0.022837
Pf3D7_08_v3	499213	501819	PF3D7_0809700	RuvB-like helicase 1	-0.004979	0.025421	0.05884		-0.032056	-0.020156	-0.011278	0.031656	0.015479
Pf3D7_08_v3	502088	506948	PF3D7_0809800	conserved Plasmodium protein, unknown function	-0.010097	-0.008071	0.03495		-0.072205	-0.00855	-0.023448	-0.022151	-0.055435
Pf3D7_08_v3	507974	512678	PF3D7_0809900	JmjC domain-containing protein, putative	0.007894	0.003664	0.098484		-0.057343	-0.046137	-0.043009	-0.063418	-0.02665
Pf3D7_08_v3	519081	520241	PF3D7_0810100	apicoplast ribosomal protein L33 precursor, putative	0.035176	0.149146	0.191897		-0.148199	-0.055657	0.234032	0.032836	-0.074981
Pf3D7_08_v3	520937	524259	PF3D7_0810200	ABC1 family, putative	0.007194	0.070154	0.006725		0.028499	0.003782	-0.00769	-0.023732	0.013347
Pf3D7_08_v3	524808	527854	PF3D7_0810300	protein phosphatase PPM5, putative	-0.011588	0.087792	0.057586		9.8e-05	0.022594	0.052607	0.065413	0.038389
Pf3D7_08_v3	531970	534250	PF3D7_0810400	aquaporin, putative	-0.016308	0.16751	0.162991		-0.153838	-0.103523	-0.006692	-0.011327	-0.137558
Pf3D7_08_v3	534251	536869	PF3D7_0810500	protein phosphatase PPM7, putative	0.023169	-0.020738	0.027361		0.008907	-0.019848	0.002334	0.103651	-0.045068
Pf3D7_08_v3	541721	545046	PF3D7_0810600	ATP-dependent RNA helicase DBP1, putative	0.008105	0.031593	0.035101		-0.095503	-0.027672	-0.045287	-0.059788	-0.109235
Pf3D7_08_v3	545913	547615	PF3D7_0810700	conserved Plasmodium protein, unknown function	0.003757	-0.038028	-0.013391		-0.077259	0.004219	-0.116651	-0.098807	-0.061207
Pf3D7_08_v3	547950	550866	PF3D7_0810800	hydroxymethyldihydropterin pyrophosphokinase-dihydropteroate synthase	0.016345	0.002496	0.100706		-0.010572	-0.020572	-0.120096	0.019104	-0.005998
Pf3D7_08_v3	550949	552678	PF3D7_0810900	conserved Plasmodium protein, unknown function	-0.006879	0.238789	0.090424		0.036032	0.050154	0.11124	0.069201	0.090784
Pf3D7_08_v3	554187	557455	PF3D7_0811000	cullin-1, putative	-0.001888	-0.032624	-0.078311		0.013711	-0.027392	-0.106015	-0.031462	0.000373
Pf3D7_08_v3	557634	559756	PF3D7_0811100	mitochondrial carrier protein, putative	-0.02571	0.071395	0.099391		-0.016698	-0.010068	-0.006291	-0.026399	0.00313
Pf3D7_08_v3	560494	564526	PF3D7_0811200	ER membrane protein complex subunit 1, putative	0.03616	-0.033293	-0.114974		0.043057	0.011399	-0.0116	0.11553	0.031911
Pf3D7_08_v3	567574	573398	PF3D7_0811300	CCR4-associated factor 1	-0.001586	0.026107	-0.007009		-0.046446	-0.003298	-0.094285	-0.078794	-0.054536
Pf3D7_08_v3	575736	578620	PF3D7_0811400	conserved protein, unknown function	-0.002058	-0.007443	0.059877		0.055854	0.009586	0.024491	-0.000312	0.047356
Pf3D7_08_v3	579233	582471	PF3D7_0811500	histone-arginine methyltransferase CARM1, putative	-0.000591	-0.017004	-0.013881		0.022304	0.008937	-0.063869	-0.02981	-0.007305
Pf3D7_08_v3	582733	587203	PF3D7_0811600	conserved protein, unknown function	-0.008098	-0.058988	-0.05327		0.100098	0.142368	0.008242	0.092089	0.104143
Pf3D7_08_v3	589571	593569	PF3D7_0811700	conserved Plasmodium protein, unknown function	0.00387	-0.021182	-0.070719		-0.066545	-0.03276	-0.095781	-0.023761	-0.030815
Pf3D7_08_v3	593570	595662	PF3D7_0811800	conserved Plasmodium protein, unknown function	-0.075186	0.035169	0.056362		-0.043806	0.09961	-0.118578	-0.008883	0.123839
Pf3D7_08_v3	595940	600426	PF3D7_0811900	RNA-binding protein, putative	0.006061	-0.045472	-0.04571		0.010539	-0.023458	-0.080704	0.00274	-0.014083
Pf3D7_08_v3	600427	602497	PF3D7_0812000	conserved protein, unknown function	-0.0086	0.037824	-0.107936		0.034429	-0.017402	0.017928	-0.069363	0.069848
Pf3D7_08_v3	604673	613101	PF3D7_0812100	proteasome activator complex subunit 4, putative	0.021063	-0.089037	-0.067705		0.005293	-0.030074	-0.072114	0.013241	0.013095
Pf3D7_08_v3	613102	614890	PF3D7_0812220	GTPase, putative	0.002927	-0.084341	-0.014424		0.047091	0.143171	-0.000459	0.114944	0.156951
Pf3D7_08_v3	614891	618071	PF3D7_0812200	trypsin-like serine protease, putative	-0.027165	0.031265	0.012655		0.092581	0.126177	-0.010616	0.102492	0.116108
Pf3D7_08_v3	618593	620478	PF3D7_0812300	sporozoite surface protein 3, putative	-0.025362	-0.026594	0.057697		-0.056834	-0.010543	-0.019332	0.042515	-0.007002
Pf3D7_08_v3	621555	623692	PF3D7_0812400	karyopherin alpha	0.008242	-0.062972	-0.119479		0.003987	0.036993	-0.046757	-0.010359	0.02346
Pf3D7_08_v3	625819	629195	PF3D7_0812500	RNA-binding protein, putative	0.003656	-0.04914	-0.063263		0.019251	-0.02355	0.013992	-0.013034	-0.024811
Pf3D7_08_v3	631334	632479	PF3D7_0812600	ubiquitin-conjugating enzyme E2, putative	-0.018931	-0.046918	0.111714		-0.059528	-0.045192	-0.038148	0.086331	0.026789
Pf3D7_08_v3	633740	634947	PF3D7_0812700	U1 small nuclear ribonucleoprotein C, putative	0.044885	-0.112262	-0.061975		-0.031795	-0.109072	-0.109281	-0.07085	-0.166447
Pf3D7_08_v3	636378	641708	PF3D7_0812900	conserved Plasmodium protein, unknown function	-0.022122	-0.036027	0.000994		0.03716	0.023367	-0.001553	-0.008076	-0.021359
Pf3D7_08_v3	642836	645135	PF3D7_0813000	conserved protein, unknown function	-0.018669	-0.005358	-0.02794		0.035067	0.045992	0.105226	-0.02267	0.069479
Pf3D7_08_v3	647066	649554	PF3D7_0813100	conserved Plasmodium protein, unknown function	0.001763	-0.023788	-0.049633		-0.001593	0.004535	-0.031351	-0.041922	-0.01508
Pf3D7_08_v3	651167	653054	PF3D7_0813200	CS domain protein, putative	-0.013866	0.042524	0.088717		-0.009445	0.000501	-0.109388	0.000203	-0.022351
Pf3D7_08_v3	655828	657880	PF3D7_0813300	conserved protein, unknown function	0.000329	-0.096892	-0.003129		0.094152	0.077627	0.049988	0.118401	0.073361
Pf3D7_08_v3	658243	662345	PF3D7_0813400	conserved protein, unknown function	-0.000488	-0.093739	-0.082488		0.00029	0.010814	-0.051028	0.02342	-0.004651
Pf3D7_08_v3	665298	667345	PF3D7_0813500	PUB domain-containing protein, putative	0.028582	-0.074509	-0.057003		-0.047921	-0.015662	-0.17549	-0.080917	-0.105923
Pf3D7_08_v3	669291	670945	PF3D7_0813600	translation initiation factor SUI1, putative	0.045374	0.064952	0.096299		-0.061363	-0.085008	-0.099979	0.034501	-0.080631
Pf3D7_08_v3	670946	675666	PF3D7_0813700	ABC transporter F family member 1	-0.006469	-0.125622	0.004468		-0.001835	-0.016098	-0.150044	-0.051777	-0.126427
Pf3D7_08_v3	676141	677714	PF3D7_0813800	GDP-mannose 4,6-dehydratase	-0.007288	0.056303	0.087168		0.076303	0.123929	-0.002124	0.003854	0.067249
Pf3D7_08_v3	677739	678975	PF3D7_0813900	40S ribosomal protein S16, putative	0.004218	0.038973	0.108336		-0.048906	0.109125	-0.012879	0.07102	0.027457
Pf3D7_08_v3	680707	682059	PF3D7_0814000	60S ribosomal protein L13-2, putative	-0.022249	-0.20776	-0.053587		0.066337	0.08085	0.02815	0.107264	0.019558
Pf3D7_08_v3	682268	683822	PF3D7_0814100	conserved Plasmodium protein, unknown function	0.004235	0.044983	-0.022606		0.065389	0.073235	0.028816	0.06044	0.16397
Pf3D7_08_v3	687090	688336	PF3D7_0814200	DNA/RNA-binding protein Alba 1	-0.017358	-0.180135	-0.135881		0.152902	0.054996	-0.046442	0.093868	0.020734
Pf3D7_08_v3	690291	694393	PF3D7_0814300	AAA family ATPase, putative	0.015156	-0.067901	-0.064622		0.004692	0.015683	-0.066754	-0.018274	-0.019343
Pf3D7_08_v3	694965	697772	PF3D7_0814400	phospholipase DDHD1, putative	0.041705	-0.0807	-0.031224		0.056759	0.100423	-0.031729	0.043159	0.02811
Pf3D7_08_v3	700126	702902	PF3D7_0814500	conserved protein, unknown function	-0.003762	0.028839	-0.035947		-0.075252	-0.091578	-0.114742	-0.062885	-0.10767
Pf3D7_08_v3	703252	704933	PF3D7_0814600	conserved protein, unknown function	0.003538	-0.002566	-0.083445		-0.063527	-0.129548	-0.145269	-0.090482	-0.118046
Pf3D7_08_v3	705826	707246	PF3D7_0814700	conserved Plasmodium protein, unknown function	0.006235	-0.157947	-0.074775		0.046124	-0.015374	-0.067412	-0.012927	0.027727
Pf3D7_08_v3	707978	709074	PF3D7_0814900	superoxide dismutase [Fe]	0.044425	-0.038443	-0.081934		-0.034256	-0.142322	-0.048587	-0.003022	-0.195576
Pf3D7_08_v3	709083	710850	PF3D7_0815000	selenoprotein	-0.008274	0.064764	0.049772		-0.045263	-0.090039	-0.166716	-0.012779	-0.044777
Pf3D7_08_v3	710989	714416	PF3D7_0815100	heptatricopeptide repeat and RAP domain-containing protein, putative	-0.006185	-0.046046	-0.002358		0.011984	-0.072877	-0.087662	-0.036536	-0.072944
Pf3D7_08_v3	716863	719996	PF3D7_0815200	importin subunit beta, putative	0.009584	-0.085441	-0.069603		0.011037	-0.048191	-0.072666	-0.060791	0.011238
Pf3D7_08_v3	721678	725628	PF3D7_0815300	FAD-dependent monooxygenase, putative	0.003677	0.064462	0.05311		-0.039852	-0.031111	0.000107	0.003571	-0.131672
Pf3D7_08_v3	725629	726752	PF3D7_0815400	ATP synthase-associated protein, putative	0.041508	0.153445	0.021587		0.059247	0.151522	0.057509	0.163649	-0.01674
Pf3D7_08_v3	727412	729822	PF3D7_0815500	conserved Plasmodium protein, unknown function	0.000495	0.023973	0.070453		-0.00545	0.041336	-0.005245	-0.050366	-0.055505
Pf3D7_08_v3	729823	732437	PF3D7_0815600	eukaryotic translation initiation factor 3 subunit G, putative	0.008564	-0.010242	0.079831		-0.010883	-0.03382	0.137427	0.009084	-0.032819
Pf3D7_08_v3	733029	734823	PF3D7_0815700	ubiquitin	0.028655	-0.086954	0.040586		-0.083524	0.043711	-0.044687	0.108557	0.008413
Pf3D7_08_v3	735430	741431	PF3D7_0815800	vacuolar protein sorting-associated protein 9, putative	-0.007873	-0.0671	0.020864		-0.037836	-0.023133	-0.010077	0.024137	0.003544
Pf3D7_08_v3	743255	745755	PF3D7_0815900	dihydrolipoyl dehydrogenase, apicoplast	-0.012876	-0.029682	-0.026113		-0.049577	-0.054213	-0.046252	-0.038461	-0.016547
Pf3D7_08_v3	745763	747738	PF3D7_0816000	ribosome assembly protein RRB1, putative	0.013489	-0.071877	-0.010918		-0.081069	-0.090448	-0.074922	-0.079027	-0.110083
Pf3D7_08_v3	748403	749852	PF3D7_0816100	phosphopantothenoylcysteine decarboxylase, putative	0.039751	0.040558	0.105927		0.052544	0.049137	0.168924	0.065746	0.121223
Pf3D7_08_v3	749853	750961	PF3D7_0816200	vacuolar protein sorting-associated protein 2, putative	0.000312	-0.030796	-0.016701		-0.023236	0.003187	0.061749	-0.034214	0.045699
Pf3D7_08_v3	751692	756423	PF3D7_0816300	conserved Plasmodium protein, unknown function	-0.026517	-0.073616	-0.094478		0.077336	0.10252	-0.058895	0.111353	0.076476
Pf3D7_08_v3	756974	758457	PF3D7_0816400	EF-hand calcium-binding domain-containing protein, putative	-0.033125	-0.185994	-0.163324		0.031024	0.024656	-0.072394	0.057435	0.044283
Pf3D7_08_v3	759888	761281	PF3D7_0816500	small heat shock protein HSP20, putative	-0.003403	0.01853	0.058052		-0.029707	-0.083881	0.125739	0.044177	-0.032891
Pf3D7_08_v3	761868	765580	PF3D7_0816600	chaperone protein ClpB1	0.003675	-0.020635	-0.005855		-0.021141	0.016404	-0.011525	-0.014991	0.003946
Pf3D7_08_v3	767899	770042	PF3D7_0816800	meiotic recombination protein DMC1, putative	0.043231	0.025861	0.076276		0.092577	0.02815	0.050841	0.067291	0.049493
Pf3D7_08_v3	770696	772023	PF3D7_0816900	adenylate kinase 2	0.005405	-0.010585	-0.165058		0.02388	0.037936	-0.097188	0.004173	0.028616
Pf3D7_08_v3	772318	773987	PF3D7_0817000	NEDD8-activating enzyme E1 catalytic subunit, putative	-0.00195	-0.212793	-0.231516		0.03668	-0.048928	-0.128669	-0.09887	0.056191
Pf3D7_08_v3	774049	777024	PF3D7_0817100	tRNA modification GTPase, putative	0.013372	-0.030262	-0.103144		0.001065	-0.037559	0.043142	-0.041465	-0.037369
Pf3D7_08_v3	777025	779897	PF3D7_0817200	conserved protein, unknown function	0.021247	-0.010931	0.006335		-0.092372	-0.065298	-0.101656	-0.047652	-0.059957
Pf3D7_08_v3	782659	789866	PF3D7_0817300	conserved Plasmodium protein, unknown function	-0.015139	0.005364	0.019171		-0.035003	-0.042308	-0.131635	-0.029892	-0.068673
Pf3D7_08_v3	794037	798056	PF3D7_0817400	phosphatase, putative	0.031115	-0.034997	-0.040155		0.01618	0.080718	0.112458	0.054868	0.067706
Pf3D7_08_v3	798527	800455	PF3D7_0817500	histidine triad nucleotide-binding protein 1	0.03406	-0.03011	0.018728		0.005404	-0.045423	-0.036546	-0.001216	0.104914
Pf3D7_08_v3	800670	804284	PF3D7_0817600	conserved protein, unknown function	0.010172	0.125481	0.016296		-0.021533	0.057873	-0.001192	0.012404	0.044464
Pf3D7_08_v3	805547	813715	PF3D7_0817700	rhoptry neck protein 5	0.007712	-0.03245	0.030286		0.059404	0.02218	-0.018012	-0.013589	0.000981
Pf3D7_08_v3	816553	817352	PF3D7_0817900	high mobility group protein B2	0.012005	-0.049626	-0.223166		0.053575	-0.063018	-0.026316	0.176577	-0.103567
Pf3D7_08_v3	821084	822702	PF3D7_0818000	U4/U6.U5 small nuclear ribonucleoprotein, putative	-0.01493	-0.05308	-0.131213		0.00919	0.057053	-0.011043	-0.0202	0.006374
Pf3D7_08_v3	824314	826768	PF3D7_0818100	zinc finger protein, putative	0.035115	-0.117686	-0.097711		0.109273	0.024392	-0.052588	-0.049799	0.085981
Pf3D7_08_v3	829756	831704	PF3D7_0818200	14-3-3 protein	-0.021163	0.022246	0.107387		0.068295	-0.032175	-0.002366	0.013284	0.000861
Pf3D7_08_v3	832935	835584	PF3D7_0818300	dynactin subunit 6, putative	-0.010056	0.030261	0.044834		-0.029482	-0.044308	0.004871	-0.019007	-0.099592
Pf3D7_08_v3	835728	837098	PF3D7_0818400	rRNA-processing protein FCF1, putative	0.024656	-0.15678	-0.235778		0.036049	0.023433	0.083834	-0.01185	-0.043888
Pf3D7_08_v3	842067	843465	PF3D7_0818500	zinc finger protein, putative	0.008126	-0.082066	-0.191987		-0.02855	-0.055002	0.070604	-0.028349	0.037108
Pf3D7_08_v3	845003	847630	PF3D7_0818600	BEM46-like protein, putative	-0.020978	0.074651	0.008201		0.085174	0.108625	0.106112	0.056692	0.127602
Pf3D7_08_v3	848027	853197	PF3D7_0818700	DNA helicase, putative	-0.003587	-0.050499	-0.01579		-0.019996	-0.01311	-0.034176	0.025732	-0.037707
Pf3D7_08_v3	855404	856992	PF3D7_0818800	U3 small nucleolar ribonucleoprotein protein IMP4, putative	0.015883	0.105601	0.032148		0.030122	0.063088	0.067729	0.104982	0.072741
Pf3D7_08_v3	860134	862667	PF3D7_0818900	heat shock protein 70	0.000336	-0.101314	0.003819		0.064448	0.046435	-0.091394	0.084594	0.031078
Pf3D7_08_v3	863255	868387	PF3D7_0819000	conserved Plasmodium protein, unknown function	-0.008122	0.00803	-0.049413		0.086868	0.068702	-0.040064	0.012495	0.039024
Pf3D7_08_v3	869312	870824	PF3D7_0819100	BRIX domain, putative	0.015513	-0.038615	-0.041418		0.137568	0.106408	0.015244	0.0856	0.15045
Pf3D7_08_v3	871160	873690	PF3D7_0819200	perforin-like protein 5	0.004069	-0.075689	-0.094507		0.073886	-0.016476	-0.000538	0.065406	-0.019633
Pf3D7_08_v3	874117	877748	PF3D7_0819300	conserved Plasmodium protein, unknown function	-0.018649	0.060662	-0.004882		-0.058303	-0.073798	-0.124745	-0.035834	-0.024278
Pf3D7_08_v3	878245	880709	PF3D7_0819400	perforin-like protein 4	0.006935	-0.089554	-0.131218		0.078087	-0.011082	-0.039614	-0.0414	0.000554
Pf3D7_08_v3	881340	884640	PF3D7_0819500	conserved protein, unknown function	0.003796	-0.059379	-0.034952		-0.022917	-0.014109	-0.029051	0.014581	-0.017637
Pf3D7_08_v3	884948	886386	PF3D7_0819600	conserved protein, unknown function	-0.005964	-0.076962	0.048272		-0.018585	-0.056521	0.01183	-0.081315	-0.045747
Pf3D7_08_v3	887876	890721	PF3D7_0819700	conserved Plasmodium protein, unknown function	0.007481	-0.078175	-0.091331		0.067491	-0.026912	0.032675	0.025639	-0.038965
Pf3D7_08_v3	891408	898752	PF3D7_0819800	conserved Plasmodium protein, unknown function	0.014474	-0.002345	-0.010216		0.023183	0.005036	-0.026599	0.045572	0.010328
Pf3D7_08_v3	900492	907964	PF3D7_0820000	Snf2-related CBP activator, putative	0.011229	0.018396	-0.023083		-0.04221	-0.008528	-0.033549	-0.014544	-0.05315
Pf3D7_08_v3	908957	910966	PF3D7_0820100	RNA-binding protein, putative	-0.035095	0.103775	0.011369		0.081584	0.173561	-0.015751	0.026871	0.144661
Pf3D7_08_v3	912014	914499	PF3D7_0820200	phosphatidylglycerophosphate synthase	0.021033	0.054953	0.073828		-0.013604	0.078985	-0.000249	0.01962	0.063492
Pf3D7_08_v3	918805	921146	PF3D7_0820300	conserved Plasmodium protein, unknown function	0.044703	-0.126388	-0.140357		-0.000901	0.006608	-0.123417	0.027354	-0.075935
Pf3D7_08_v3	921958	924182	PF3D7_0820400	conserved Plasmodium protein, unknown function	0.021766	-0.046511	0.043975		-0.086528	0.015943	-0.084783	-0.031826	0.017966
Pf3D7_08_v3	924863	927921	PF3D7_0820500	protein transport protein YIF1, putative	-0.004357	-0.01343	-0.040641		-0.034987	0.048523	-0.013892	0.014288	0.03802
Pf3D7_08_v3	928895	931111	PF3D7_0820600	conserved protein, unknown function	-0.024599	0.002775	-0.013508		-0.007766	-0.042323	0.097395	-0.041939	0.070536
Pf3D7_08_v3	932071	935876	PF3D7_0820700	2-oxoglutarate dehydrogenase E1 component	-0.016276	0.009838	0.042996		-0.011198	0.109718	0.009991	-0.003146	0.085419
Pf3D7_08_v3	936176	939126	PF3D7_0820800	conserved Plasmodium protein, unknown function	0.014419	-0.022578	-0.026454		-0.065352	-0.027419	-0.157779	0.00082	-0.056959
Pf3D7_08_v3	939333	944895	PF3D7_0820900	conserved Plasmodium protein, unknown function	0.011321	-0.002588	-0.041369		-0.035117	0.042789	-0.065354	0.027672	0.001653
Pf3D7_08_v3	948495	951149	PF3D7_0821000	conserved Plasmodium protein, unknown function	-0.001853	-0.059907	-0.011996		0.014909	0.065417	-0.168836	-0.032046	0.0959
Pf3D7_08_v3	953198	956564	PF3D7_0821100	protein kinase 1	0.021383	-0.088037	-0.075948		-0.057212	-0.001284	-0.094665	0.013874	-0.076634
Pf3D7_08_v3	957248	958302	PF3D7_0821200	conserved protein, unknown function	0.021763	0.025168	0.080386		0.061436	0.115735	-0.093186	0.02197	0.095888
Pf3D7_08_v3	958303	961990	PF3D7_0821300	ATP-dependent RNA helicase DHX36, putative	0.017671	-0.043683	0.028872		-0.014306	0.066215	-0.079247	0.026395	-0.030355
Pf3D7_08_v3	965572	966907	PF3D7_0821400	conserved Plasmodium protein, unknown function	0.024693	0.001433	-0.026383		-0.077255	0.069174	-0.164227	-0.014819	-0.004764
Pf3D7_08_v3	967651	968990	PF3D7_0821500	ribosomal RNA small subunit methyltransferase NEP1, putative	-0.001658	-0.040733	-0.032921		0.054607	0.065816	0.075842	0.005084	0.002521
Pf3D7_08_v3	969440	971964	PF3D7_0821600	polyribonucleotide 5'-hydroxyl-kinase Clp1, putative	0.039521	-0.051444	-0.029161		0.026233	0.081109	-0.036632	0.044005	0.0553
Pf3D7_08_v3	973336	974517	PF3D7_0821700	60S ribosomal protein L22, putative	-0.066442	0.191999	0.054531		-0.01001	0.108831	0.150449	0.070962	0.173159
Pf3D7_08_v3	975824	976894	PF3D7_0821800	protein transport protein SEC61 subunit beta, putative	0.020711	-0.187057	0.030622		0.039394	0.08525	-0.049867	-0.030347	0.070179
Pf3D7_08_v3	977182	978438	PF3D7_0821900	conserved protein, unknown function	-0.010659	0.07722	0.049646		-0.075444	-0.082439	-0.124772	-0.058148	-0.016754
Pf3D7_08_v3	978548	980826	PF3D7_0822000	ribosomal protein L4, mitochondrial, putative	-0.005067	-0.064515	-0.078612		-0.01239	-0.013832	0.005326	0.052248	0.004635
Pf3D7_08_v3	980827	981972	PF3D7_0822100	mediator of RNA polymerase II transcription subunit 7, putative	-0.027701	-0.231895	-0.244412		-0.080919	-0.102174	-0.051202	-0.056006	-0.103549
Pf3D7_08_v3	982320	987946	PF3D7_0822200	phosphorylated CTD interacting factor 1 WW domain-containing protein, putative	-0.006491	-0.042614	-0.002907		0.05374	0.114199	0.075431	0.104251	0.042725
Pf3D7_08_v3	990000	992631	PF3D7_0822400	conserved Plasmodium protein, unknown function	-0.018325	0.104658	0.087285		-0.053379	0.009206	0.06871	0.003364	0.011985
Pf3D7_08_v3	992632	994215	PF3D7_0822500	dynein light chain 1	-0.01521	-0.038307	-0.000528		0.056276	0.183114	-0.067172	0.089787	0.191307
Pf3D7_08_v3	996805	999779	PF3D7_0822600	protein transport protein SEC23	0.022303	-0.022378	-0.010206		-0.042506	-0.017714	-0.027848	0.017267	-0.028501
Pf3D7_08_v3	1000731	1004005	PF3D7_0822700	thrombospondin-related protein 1, putative	0.002225	0.048025	0.047163		-0.065996	-0.024805	-0.060104	-0.001147	-0.020468
Pf3D7_08_v3	1005586	1007060	PF3D7_0822800	U5 small nuclear ribonucleoprotein 40 kDa protein, putative	0.017074	0.115196	0.043667		-0.000128	-0.01968	-0.040799	0.030141	0.015446
Pf3D7_08_v3	1007527	1011557	PF3D7_0822900	conserved Plasmodium protein, unknown function	0.001903	0.061911	0.040065		0.028733	0.075848	0.013889	0.061662	0.064842
Pf3D7_08_v3	1012677	1017626	PF3D7_0823000	serine/threonine protein kinase VPS15, putative	0.00645	0.083392	0.047942		0.016141	0.087683	-0.033825	0.034047	0.012351
Pf3D7_08_v3	1017839	1019518	PF3D7_0823100	RWD domain-containing protein, putative	-0.029069	0.078753	0.124863		0.059929	0.115473	0.103291	-0.053283	0.118509
Pf3D7_08_v3	1022379	1024096	PF3D7_0823200	RNA-binding protein, putative	0.004448	0.032918	-0.007554		0.000362	-0.0402	-0.074317	0.026113	-0.0649
Pf3D7_08_v3	1028502	1033764	PF3D7_0823300	histone acetyltransferase GCN5	-0.013001	0.042835	0.073742		-0.069041	-0.102729	-0.146519	-0.04541	-0.079552
Pf3D7_08_v3	1034167	1036678	PF3D7_0823400	alpha/beta hydrolase, putative	0.002857	0.078039	0.06463		0.046405	0.027871	0.047636	0.007652	-0.002632
Pf3D7_08_v3	1036850	1038858	PF3D7_0823500	inner membrane complex protein 1i, putative	-0.015739	-0.03977	-0.034627		0.122718	0.081706	-0.035711	0.038995	0.07159
Pf3D7_08_v3	1039657	1041461	PF3D7_0823600	lipoate-protein ligase B	0.015385	-0.056737	-0.049375		-0.058709	-0.058677	-0.12097	-0.084097	0.035339
Pf3D7_08_v3	1043563	1046030	PF3D7_0823800	DnaJ protein, putative	-0.016668	0.041257	0.009275		-0.000598	0.030601	-0.071812	0.021134	-0.004215
Pf3D7_08_v3	1047301	1048757	PF3D7_0823900	dicarboxylate/tricarboxylate carrier	-0.018036	0.052983	-0.03222		0.009747	0.080072	0.031487	0.074639	0.041325
Pf3D7_08_v3	1049032	1051955	PF3D7_0824000	conserved Plasmodium protein, unknown function	-0.007771	0.028606	0.043938		0.045981	0.061614	-0.086673	-0.01477	0.077015
Pf3D7_08_v3	1052521	1054241	PF3D7_0824100	exonuclease, putative	-0.029103	0.085899	-0.0165		-0.023692	0.016848	-0.042266	0.015927	-0.026174
Pf3D7_08_v3	1054885	1059124	PF3D7_0824200	conserved Plasmodium protein, unknown function	-0.033848	0.087899	0.102446		0.029461	0.07476	-0.006992	0.027769	0.019032
Pf3D7_08_v3	1059125	1061817	PF3D7_0824300	GTP-binding protein Obg2, putative	0.012673	0.08511	0.105503		0.020637	0.028471	-0.073557	0.022342	-0.012533
Pf3D7_08_v3	1062054	1064311	PF3D7_0824400	nucleoside transporter 2	-0.032452	-0.103937	-0.07485		-0.051486	-0.026898	-0.043871	0.035747	0.007772
Pf3D7_08_v3	1065904	1067722	PF3D7_0824500	conserved protein, unknown function	-0.014489	-0.039623	0.050016		-0.016577	0.062087	0.016384	-0.007651	0.069862
Pf3D7_08_v3	1068313	1070152	PF3D7_0824600	Fe-S cluster assembly protein DRE2, putative	-0.05247	0.049298	-0.025318		0.049706	0.179005	0.086254	0.141964	0.14348
Pf3D7_08_v3	1070738	1074667	PF3D7_0824700	lipase maturation factor, putative	-0.037147	0.125109	0.126931		0.012715	0.118117	-0.035226	0.063707	0.145739
Pf3D7_08_v3	1075550	1079842	PF3D7_0824800	conserved Plasmodium membrane protein, unknown function	0.001307	0.025941	0.00239		-0.04491	-0.058986	-0.007399	-0.026205	-0.03894
Pf3D7_08_v3	1079843	1083241	PF3D7_0824900	conserved Plasmodium protein, unknown function	-0.016834	-0.095223	0.002425		0.036737	-0.019639	-0.070394	-0.035429	-0.067503
Pf3D7_08_v3	1085798	1091498	PF3D7_0825000	conserved Plasmodium protein, unknown function	-0.011007	0.069477	0.091279		-0.002522	0.03214	0.012148	-0.04121	0.017055
Pf3D7_08_v3	1091748	1093455	PF3D7_0825100	ankyrin-repeat protein, putative	-0.001152	-0.102687	-0.115893		-0.103263	-0.019044	-0.11344	0.054743	-0.058725
Pf3D7_08_v3	1093456	1094739	PF3D7_0825200	translation initiation factor IF-3	-0.013758	0.190933	0.119716		-0.08573	0.023084	-0.209576	0.00975	-0.116246
Pf3D7_08_v3	1096173	1097613	PF3D7_0825400	ATP synthase-associated protein, putative	-0.029732	0.092791	0.12945		0.04253	0.013247	-0.073864	0.039888	-0.036818
Pf3D7_08_v3	1098234	1100596	PF3D7_0825500	protein KRI1, putative	-0.036393	0.119765	0.025738		-0.048842	0.001397	-0.064757	0.022061	-0.03583
Pf3D7_08_v3	1101637	1103054	PF3D7_0825700	crystalloid-specific PH domain-containing protein, putative	-0.030842	-0.103884	-0.176904		0.054606	0.21221	-0.079108	0.09344	0.102753
Pf3D7_08_v3	1103518	1105358	PF3D7_0825800	conserved protein, unknown function	-0.001622	0.054125	-0.001886		0.046659	0.046073	-0.032216	0.018547	0.104028
Pf3D7_08_v3	1105798	1108211	PF3D7_0825900	conserved Plasmodium protein, unknown function	-0.004027	-0.032392	0.082938		0.042114	0.056479	0.033411	0.026741	0.006559
Pf3D7_08_v3	1109026	1113044	PF3D7_0826000	conserved Plasmodium protein, unknown function	0.001031	0.062325	0.018736		-0.040165	-0.038304	0.018583	0.014587	-0.027512
Pf3D7_08_v3	1113119	1139394	PF3D7_0826100	HECT-like E3 ubiquitin ligase, putative	-0.006529	0.035123	0.014587		-0.006745	0.03232	-0.021286	0.016849	-0.012998
Pf3D7_08_v3	1142249	1144557	PF3D7_0826200	alpha/beta hydrolase, putative	0.00409	-0.007606	-0.072415		-0.011906	0.001062	-0.093771	0.016166	0.000289
Pf3D7_08_v3	1145917	1147754	PF3D7_0826300	SPRY domain, putative	0.010315	0.007342	-0.064098		0.029006	-0.006994	0.006401	0.10064	0.001223
Pf3D7_08_v3	1147760	1150080	PF3D7_0826400	dehydrodolichyl diphosphate synthetase, putative	0.033221	0.103387	0.036331		0.034759	0.20846	0.028907	0.134561	0.205564
Pf3D7_08_v3	1152052	1156532	PF3D7_0826500	ubiquitin conjugation factor E4 B, putative	-0.019953	-0.02266	-0.086908		-0.011481	-0.003718	-0.00476	0.053032	0.024549
Pf3D7_08_v3	1157071	1158401	PF3D7_0826600	SNARE protein, putative	0.009471	0.036027	0.071532		0.084032	0.05601	0.163619	0.131595	0.084512
Pf3D7_08_v3	1159914	1161958	PF3D7_0826700	receptor for activated c kinase	-0.013657	0.032644	-0.003342		-0.077539	-0.0498	0.002234	0.007545	-0.042975
Pf3D7_08_v3	1164405	1167392	PF3D7_0826900	conserved Plasmodium protein, unknown function	-0.016895	0.048429	0.003287		0.008835	-0.048858	-0.004359	-0.019781	0.0215
Pf3D7_08_v3	1167393	1171698	PF3D7_0827000	ATP-dependent RNA helicase DBP10, putative	-0.001407	0.018767	0.05619		-0.003694	-0.026843	-0.06805	-0.039538	0.029794
Pf3D7_08_v3	1172144	1176837	PF3D7_0827100	translation initiation factor IF-2, putative	-0.0152	0.068454	-0.011173		-0.038471	-0.055014	-0.006962	-0.047923	-0.029267
Pf3D7_08_v3	1177060	1180574	PF3D7_0827200	conserved Plasmodium protein, unknown function	-0.028907	0.109184	0.170349		-0.022896	0.027537	0.030373	0.058141	0.027973
Pf3D7_08_v3	1181045	1184046	PF3D7_0827300	conserved Plasmodium protein, unknown function	0.030047	-0.046914	0.043093		-0.013571	-0.071123	0.003152	-0.079841	-0.022869
Pf3D7_08_v3	1184345	1185501	PF3D7_0827400	conserved Plasmodium protein, unknown function	0.008186	0.131268	0.081738		0.226322	0.061678	0.051842	-0.022371	0.138628
Pf3D7_08_v3	1185925	1187374	PF3D7_0827500	ribosomal protein L21, apicoplast, putative	0.018208	-0.044786	-0.038469		0.010832	-0.016329	-0.05452	0.066916	-0.035542
Pf3D7_08_v3	1187375	1193175	PF3D7_0827600	conserved Plasmodium protein, unknown function	-0.003164	0.032423	0.057498		-0.013478	-0.103241	-0.008548	-0.050094	-0.024343
Pf3D7_08_v3	1193597	1196928	PF3D7_0827700	magnesium transporter, putative	0.011029	0.027602	-0.043282		0.030383	-0.023185	-0.007285	-0.004463	0.023679
Pf3D7_08_v3	1198608	1206307	PF3D7_0827800	SET domain protein, putative	-0.001403	0.032489	0.078385		-0.010499	-0.009489	-0.031823	-0.034314	-0.033768
Pf3D7_08_v3	1206538	1208644	PF3D7_0827900	protein disulfide isomerase	0.003541	-0.006954	-0.006283		0.060508	-0.058501	-0.085878	0.018516	-0.061264
Pf3D7_08_v3	1210442	1212098	PF3D7_0828000	rhomboid protease ROM3	-0.041761	0.102714	0.163636		-0.026309	0.004134	-0.111538	-0.004491	0.034119
Pf3D7_08_v3	1212099	1215880	PF3D7_0828100	conserved Plasmodium protein, unknown function	-0.000345	-0.006862	0.031012		0.065055	0.069983	-0.044149	0.089717	0.129027
Pf3D7_08_v3	1216021	1220870	PF3D7_0828200	leucine--tRNA ligase, putative	0.004242	-0.002263	0.010433		-0.001354	-0.011906	-0.072532	0.015292	-0.003143
Pf3D7_08_v3	1220871	1222933	PF3D7_0828300	conserved protein, unknown function	0.001724	0.017045	0.048237		-0.046439	-0.090489	-0.020964	-0.135805	-0.123964
Pf3D7_08_v3	1223844	1226113	PF3D7_0828400	mitochondrial inner membrane protein OXA1, putative	-0.013639	0.028856	0.105226		-0.021568	0.02165	0.072609	-0.027008	-0.004413
Pf3D7_08_v3	1226500	1228659	PF3D7_0828500	translation initiation factor eIF-2B subunit alpha, putative	-0.028487	0.153227	0.270562		0.07708	0.093129	0.164464	0.078647	0.078727
Pf3D7_08_v3	1229649	1232382	PF3D7_0828600	folate transporter 1	0.024103	-0.024841	0.040473		0.00379	-0.035731	0.074704	0.013553	0.016072
Pf3D7_08_v3	1233122	1236723	PF3D7_0828700	conserved protein, unknown function	-0.023637	-0.005992	-0.032407		-0.038214	-0.135858	-0.035571	-0.078088	-0.047926
Pf3D7_08_v3	1237035	1239751	PF3D7_0828800	GPI-anchored micronemal antigen	0.00336	0.015086	0.009117		-0.060859	-0.11443	0.01222	-0.116706	-0.090255
Pf3D7_08_v3	1241716	1243145	PF3D7_0828900	conserved protein, unknown function	-0.036922	-0.042058	-0.060666		-0.019876	-0.028591	-0.019638	0.019419	0.041717
Pf3D7_08_v3	1244961	1251328	PF3D7_0829000	conserved Plasmodium membrane protein, unknown function	-0.013513	0.062029	0.078393		-0.03671	-0.07782	0.029661	-0.020934	-0.0415
Pf3D7_08_v3	1252099	1254046	PF3D7_0829100	coiled-coil domain-containing protein 124, putative	-0.056354	0.069619	0.013234		-0.007665	0.002279	0.047895	0.010214	-0.042492
Pf3D7_08_v3	1254308	1255626	PF3D7_0829200	prohibitin 1, putative	-0.007943	0.019627	-0.04561		-0.016595	0.051258	0.062997	0.001504	0.022675
Pf3D7_08_v3	1256305	1257383	PF3D7_0829300	U6 snRNA-associated Sm-like protein LSm8, putative	-0.024017	0.041035	0.150428		-0.163383	-0.098826	0.023694	-0.089198	-0.020657
Pf3D7_08_v3	1257466	1259291	PF3D7_0829400	prolyl 4-hydroxylase subunit alpha, putative	-0.010396	0.018712	0.064545		-0.02454	-0.04333	0.100119	0.018373	-0.036101
Pf3D7_08_v3	1259798	1266948	PF3D7_0829500	conserved Plasmodium protein, unknown function	0.002125	0.053205	0.005286		-0.020502	-0.077226	0.022994	-0.028614	-0.06281
Pf3D7_08_v3	1268885	1269897	PF3D7_0829600	early transcribed membrane protein 8	0.008509	0.157049	0.120194		-0.050607	-0.053302	0.274661	0.065825	0.014402
Pf3D7_08_v3	1271028	1272340	PF3D7_0829700	unspecified product	0.011168	0.121837	0.035539		0.096223	-0.023506	0.188132	0.060125	0.145696
Pf3D7_08_v3	1272468	1275540	PF3D7_0829800	unspecified product	-0.008116	0.0598	0.098116		-0.106409	-0.1161	0.109302	-0.039392	-0.123818
Pf3D7_08_v3	1275541	1279045	PF3D7_0829900	unspecified product	-0.006245	0.016351	0.098232		-0.00226	-0.032304	0.119949	-0.002431	-0.006529
Pf3D7_08_v3	1280685	1284011	PF3D7_0830100	unspecified product	-0.018394	-0.043124	0.045235		-0.00068	0.006195	0.088413	0.06267	0.007891
Pf3D7_08_v3	1284328	1288005	PF3D7_0830200	28S ribosomal RNA	0.003429	0.032345	0.029432		-0.063331	-0.037659	0.004671	-0.030485	-0.059375
Pf3D7_08_v3	1289990	1291656	PF3D7_0830300	sporozoite invasion-associated protein 2	-0.0674	-0.037892	-0.016679		-0.020985	-0.014663	0.183644	-0.021068	-0.078807
Pf3D7_08_v3	1293772	1294972	PF3D7_0830400	CRA domain-containing protein, putative	0.009999	0.086549	0.0269		-0.012711	0.048448	0.135276	-0.009365	-0.008244
Pf3D7_08_v3	1295884	1298578	PF3D7_0830500	sporozoite and liver stage tryptophan-rich protein, putative	0.007996	0.037813	0.135925		-0.058409	-0.032709	0.094206	-0.056534	-0.108941
Pf3D7_08_v3	1303073	1305063	PF3D7_0830600	Plasmodium exported protein (PHISTc), unknown function	-0.010719	0.078737	0.006703		-0.079369	-0.058954	0.034047	-0.044374	-0.113034
Pf3D7_08_v3	1306803	1308174	PF3D7_0830700	Plasmodium exported protein (hyp9), unknown function	0.00679	-0.094052	-0.032254		-0.098853	-0.114879	0.109908	-0.058714	-0.074184
Pf3D7_08_v3	1310387	1317205	PF3D7_0830800	surface-associated interspersed protein 8.2 (SURFIN 8.2)	-0.008168	-0.035269	-0.004285		-0.01452	-0.027291	0.10514	-0.099936	-0.032161
Pf3D7_08_v3	1317350	1318591	PF3D7_0830900	Plasmodium exported protein, unknown function	-0.009197	-0.126291	-0.007532		0.087141	0.066235	0.211718	0.046675	0.066744
Pf3D7_08_v3	1321167	1323075	PF3D7_0831000	Plasmodium exported protein (PHISTb), unknown function	-0.002771	-0.087069	-0.08587		0.069121	0.077893	0.146449	0.022026	0.074484
Pf3D7_08_v3	1324894	1331437	PF3D7_0831100	surface-associated interspersed protein 8.1 (SURFIN 8.1)	-0.023559	0.019568	0.099582		0.029104	-0.071314	0.21601	-0.061925	-0.101212
Pf3D7_08_v3	1333038	1336549	PF3D7_0831200	DnaJ protein, putative	-0.012358	0.006306	0.053233		0.023262	0.012196	0.244571	0.029372	0.062717
Pf3D7_08_v3	1339409	1342556	PF3D7_0831300	Plasmodium exported protein, unknown function	-0.028544	-0.028656	-0.050959		0.098479	0.097566	0.296532	-0.008295	0.051025
Pf3D7_08_v3	1344155	1345737	PF3D7_0831400	Plasmodium exported protein, unknown function	-0.025463	0.030973	0.050479		0.063443	0.118995	0.354416	0.020837	0.120309
Pf3D7_08_v3	1353206	1354919	PF3D7_0831500	Plasmodium exported protein (PHIST), unknown function	-0.001	-0.163886	-0.181085		-0.080463	-0.139965	0.225548	-0.165886	-0.258442
Pf3D7_08_v3	1358064	1363868	PF3D7_0831600	cytoadherence linked asexual protein 8	0.016465	-0.115669	-0.057596		-0.003991	-0.054783	0.194174	-0.029724	-0.079727
Pf3D7_08_v3	1365217	1367756	PF3D7_0831700	heat shock protein 70	0.007316	4.7e-05	-0.102765		-0.105654	-0.136783	0.027973	-0.102406	-0.203381
Pf3D7_09_v3	81752	83248	PF3D7_0901700	Plasmodium exported protein (hyp5), unknown function	-0.009038	0.241391	0.298189		-0.017507	-0.169034	0.105448	-0.004425	-0.067761
Pf3D7_09_v3	84374	85860	PF3D7_0901800	Plasmodium exported protein, unknown function	-0.027397	0.29797	0.052081		0.08055	0.070188	0.143745	0.07391	0.122468
Pf3D7_09_v3	86134	88325	PF3D7_0901900	probable protein, unknown function	0.027737	0.024238	-0.093335		-0.037622	-0.035417	0.08126	-0.064516	0.03934
Pf3D7_09_v3	89111	91545	PF3D7_0902000	serine/threonine protein kinase, FIKK family	0.007239	0.06813	0.054226		0.026498	-0.067578	0.140538	-0.055762	0.011486
Pf3D7_09_v3	93580	95863	PF3D7_0902100	serine/threonine protein kinase, FIKK family	-0.010099	0.056052	0.052616		0.077878	0.017832	0.017947	-0.0608	0.070691
Pf3D7_09_v3	97925	100589	PF3D7_0902200	serine/threonine protein kinase, FIKK family	0.000872	0.038195	0.018908		0.065205	0.01767	0.238026	-0.0321	-0.008632
Pf3D7_09_v3	102242	104843	PF3D7_0902300	serine/threonine protein kinase, FIKK family	0.014395	-0.003508	0.024195		-0.031255	-0.029196	0.099937	-0.059284	0.009602
Pf3D7_09_v3	106264	108656	PF3D7_0902400	serine/threonine protein kinase, FIKK family	0.005114	0.069575	0.022742		0.011903	0.008837	0.224187	-0.018986	0.066631
Pf3D7_09_v3	109084	111579	PF3D7_0902500	serine/threonine protein kinase, FIKK family	0.015396	-0.014592	-0.080295		-0.010494	-0.079299	0.067551	-0.060444	-0.106208
Pf3D7_09_v3	113159	115799	PF3D7_0902600	serine/threonine protein kinase, FIKK family	0.029249	0.112599	-0.060663		0.006913	-0.006272	0.079074	-0.065245	-0.012706
Pf3D7_09_v3	119011	120999	PF3D7_0902700	Plasmodium exported protein (PHISTb), unknown function, pseudogene	-0.009387	0.033555	0.021981		0.044767	0.008837	0.235063	0.011818	0.028143
Pf3D7_09_v3	121371	125256	PF3D7_0902800	serine repeat antigen 9	-0.008379	-0.004473	-0.040815		-0.009397	-0.010775	0.056781	0.011209	0.027955
Pf3D7_09_v3	127166	127974	PF3D7_0902900	conserved Plasmodium protein, unknown function	0.033082	0.081114	0.152231		0.023115	0.026634	0.235107	0.077609	0.040881
Pf3D7_09_v3	129921	131187	PF3D7_0903100	protein RER1, putative	0.01597	-0.151885	-0.237755		0.160854	0.04649	0.072176	0.016615	0.001299
Pf3D7_09_v3	133512	135837	PF3D7_0903200	ras-related protein RAB7	0.009261	0.063053	0.084487		0.074409	0.023874	0.017993	0.059564	0.075882
Pf3D7_09_v3	140727	150838	PF3D7_0903300	conserved protein, unknown function	-0.008721	0.015901	0.022368		0.015073	-0.034584	0.009482	0.003899	-0.036751
Pf3D7_09_v3	151450	159791	PF3D7_0903400	ATP-dependent RNA helicase DDX60, putative	0.000196	-0.055291	0.0092		0.024878	0.073399	0.003471	-0.019303	0.012725
Pf3D7_09_v3	162519	167173	PF3D7_0903500	nucleoporin NUP138, putative	0.009363	-0.004451	-0.054376		0.012142	-0.015997	0.035537	-0.033077	-0.024605
Pf3D7_09_v3	168243	173137	PF3D7_0903600	conserved protein, unknown function, unspecified product	-0.028662	0.051792	0.057281		-0.031106	-0.037881	-0.030567	-0.010404	0.008539
Pf3D7_09_v3	175292	177692	PF3D7_0903700	alpha tubulin 1	0.002828	-0.061041	0.067935		-0.089479	-0.138013	-0.075292	-0.014262	-0.119306
Pf3D7_09_v3	178937	184241	PF3D7_0903800	LCCL domain-containing protein	-0.009779	0.003747	-0.049327		0.028248	0.04004	0.00569	0.00208	-0.034513
Pf3D7_09_v3	185571	186633	PF3D7_0903900	60S ribosomal protein L32	-0.000904	0.201884	0.071345		-0.043778	-0.032577	-0.02543	-0.108208	-0.10441
Pf3D7_09_v3	187092	188872	PF3D7_0904000	GTPase-activating protein, putative	0.034188	-0.066616	-0.110252		-0.054414	0.036453	-0.174274	-0.02565	-0.048176
Pf3D7_09_v3	190608	196077	PF3D7_0904100	AP-4 complex subunit epsilon, putative	0.001871	-0.031585	-0.024266		0.001621	-0.064928	-0.014523	-0.035458	-0.073808
Pf3D7_09_v3	197617	198933	PF3D7_0904200	PH domain-containing protein, putative	-0.00897	0.060902	-0.090667		0.024273	0.005651	-0.101891	-0.018364	-0.042145
Pf3D7_09_v3	198934	207708	PF3D7_0904300	conserved protein, unknown function	-0.006771	-0.005886	0.008538		0.031775	0.011615	-0.021952	0.021885	0.016643
Pf3D7_09_v3	207918	208975	PF3D7_0904400	signal peptidase complex subunit 3, putative	-0.017855	0.04807	-0.020875		-0.007243	-0.118772	0.043444	-0.059911	-0.163995
Pf3D7_09_v3	209827	210859	PF3D7_0904500	prefoldin subunit 4, putative	0.023491	-0.103035	-0.07736		0.030191	0.125739	-0.036043	-0.013352	-0.025959
Pf3D7_09_v3	212265	218233	PF3D7_0904600	ubiquitin specific protease, putative	-0.000458	0.003617	0.016241		-0.075979	-0.003611	0.022729	0.005047	-0.034789
Pf3D7_09_v3	218425	219712	PF3D7_0904700	bacterial histone-like protein	-0.014616	0.062954	-0.02593		-0.019249	0.076995	0.013632	0.030808	-0.054256
Pf3D7_09_v3	222021	224406	PF3D7_0904800	replication protein A1, small fragment	-0.042389	0.025701	0.071202		-0.034011	0.003193	0.053448	0.022987	0.029524
Pf3D7_09_v3	224625	233081	PF3D7_0904900	copper-transporting ATPase	-0.018714	0.089656	0.076929		-0.059669	-0.014195	0.047176	-0.015247	-0.05678
Pf3D7_09_v3	234251	235596	PF3D7_0905000	conserved Plasmodium protein, unknown function	0.011065	0.149336	0.180872		-0.022682	0.188397	-0.220556	-0.000521	0.05621
Pf3D7_09_v3	236109	243219	PF3D7_0905100	nucleoporin NUP221, putative	0.023607	0.038561	0.039343		-0.008689	0.005051	-0.073458	0.053418	0.000998
Pf3D7_09_v3	245011	249110	PF3D7_0905200	mitochondrial carrier protein, putative	-0.000767	0.045034	0.0241		0.030248	-0.001481	-0.11602	0.000382	0.054505
Pf3D7_09_v3	251103	269959	PF3D7_0905300	dynein heavy chain, putative	-0.007856	0.042355	0.032195		0.04352	0.077317	-0.092579	0.023741	0.063342
Pf3D7_09_v3	270490	275039	PF3D7_0905400	high molecular weight rhoptry protein 3	-0.030223	0.03155	0.08938		0.048219	0.065264	0.016701	0.040121	0.091202
Pf3D7_09_v3	278119	279338	PF3D7_0905500	conserved protein, unknown function	-0.036116	0.087259	0.083398		-0.071229	-0.062938	0.002686	-0.019202	-0.070403
Pf3D7_09_v3	279957	284151	PF3D7_0905600	WD repeat-containing protein 66, putative	-0.003384	0.039297	0.075096		0.015315	-0.023053	-0.000908	-0.072682	-0.081798
Pf3D7_09_v3	284152	286890	PF3D7_0905700	autophagy-related protein 3, putative	0.014277	0.083791	0.062373		0.102665	0.129378	0.116656	-0.020092	0.100475
Pf3D7_09_v3	288800	293147	PF3D7_0905800	conserved Plasmodium protein, unknown function	0.027883	-0.013768	-0.078351		-0.000209	-0.082957	0.009412	0.014117	-0.019892
Pf3D7_09_v3	293335	296867	PF3D7_0905900	coatomer subunit beta, putative	-0.021081	0.012736	0.027293		0.132324	0.113565	0.051368	0.026022	0.055056
Pf3D7_09_v3	298415	304429	PF3D7_0906000	exoribonuclease II	0.001988	0.072045	0.046895		-0.011133	0.039974	-0.00897	-0.017755	0.079877
Pf3D7_09_v3	304820	306876	PF3D7_0906100	vacuolar protein sorting-associated protein 46, putative	0.016803	0.102727	0.108792		-0.111721	0.036343	0.030676	0.060788	0.059524
Pf3D7_09_v3	307053	309289	PF3D7_0906200	conserved Plasmodium protein, unknown function	-0.018489	0.012572	0.129572		-0.045214	0.037727	-0.081508	-0.04916	0.043783
Pf3D7_09_v3	310441	312234	PF3D7_0906300	Maf-like protein, putative	-0.054883	0.015564	0.12231		-0.038483	-0.019985	-0.090477	-0.095669	0.040867
Pf3D7_09_v3	312235	315237	PF3D7_0906400	dynein intermediate light chain, putative	-0.00487	0.002489	-0.083896		0.041796	0.070808	-0.054764	-0.006887	-0.0032
Pf3D7_09_v3	318061	319796	PF3D7_0906500	arginase	0.000514	0.023815	0.079601		-0.113344	-0.015755	-0.023827	-0.009269	-0.013874
Pf3D7_09_v3	320561	323592	PF3D7_0906600	zinc finger protein, putative	-0.003632	0.064854	0.021129		-0.044988	0.028037	-0.13381	-0.018268	-0.029697
Pf3D7_09_v3	330249	332110	PF3D7_0906700	leucine-rich repeat protein	-0.008361	-0.205436	-0.272224		-0.148439	-0.067472	0.000165	-0.075621	-0.073418
Pf3D7_09_v3	332111	334834	PF3D7_0906800	conserved Plasmodium protein, unknown function	0.018954	0.003319	0.032159		-0.155685	-0.03191	-0.016893	-0.022362	-0.038225
Pf3D7_09_v3	335737	337020	PF3D7_0906910	tubulin-specific chaperone, putative	0.021683	0.1019	-0.040513		-0.015968	0.093413	0.062754	0.028687	-0.0329
Pf3D7_09_v3	338031	342658	PF3D7_0907100	conserved Plasmodium protein, unknown function	0.010825	-0.053164	-0.077739		-0.014115	0.045988	0.003492	0.038381	0.03652
Pf3D7_09_v3	345642	349543	PF3D7_0907200	GTPase-activating protein, putative	0.00279	0.019119	0.00891		-0.014383	0.024618	-0.008945	-0.060932	-0.071165
Pf3D7_09_v3	349936	351212	PF3D7_0907300	prefoldin-like protein, putative	0.028573	-0.03635	-0.065539		-0.066062	-0.092579	-0.044142	-0.196421	-0.093577
Pf3D7_09_v3	351705	354973	PF3D7_0907400	ATP-dependent protease ATPase subunit ClpY	-0.008449	0.128927	0.096619		-0.013605	-0.004598	-0.00128	-0.034693	-0.091059
Pf3D7_09_v3	356286	357933	PF3D7_0907500	conserved protein, unknown function	0.01927	0.078578	0.057212		0.014858	0.059597	0.061359	0.027318	0.067377
Pf3D7_09_v3	360285	363465	PF3D7_0907600	translation initiation factor SUI1, putative	-0.013045	-0.019017	-0.057855		-0.027845	-0.037879	-0.082164	-0.040767	-0.053926
Pf3D7_09_v3	363819	365158	PF3D7_0907700	proteasome activator 28 subunit beta, putative	-0.017241	0.019384	0.035521		-0.016927	0.067946	-0.065483	-0.01028	-0.011201
Pf3D7_09_v3	367683	369039	PF3D7_0907900	peptide deformylase	0.000404	0.04203	0.031286		0.017244	-0.026168	0.044806	-0.039278	0.010356
Pf3D7_09_v3	369620	371804	PF3D7_0908000	plasma membrane protein 1, putative	0.027525	-0.108451	-0.081925		-0.080304	-0.065395	0.049028	-0.036734	-0.080262
Pf3D7_09_v3	373512	375836	PF3D7_0908100	apicoplast integral membrane protein, putative	0.005623	0.039577	0.056315		-0.044563	0.063829	-0.076625	0.027048	0.118689
Pf3D7_09_v3	377785	383246	PF3D7_0908200	conserved Plasmodium protein, unknown function	0.00924	0.058594	0.048064		0.004876	0.044042	-0.029502	-0.003454	0.017512
Pf3D7_09_v3	383400	385966	PF3D7_0908300	conserved protein, unknown function	-0.003739	0.184284	0.186616		-0.038631	0.107111	0.155424	0.099035	0.001575
Pf3D7_09_v3	387899	388986	PF3D7_0908400	conserved Plasmodium protein, unknown function	-0.004852	0.136207	0.1078		-0.163331	-0.023902	0.011497	0.125254	-0.162296
Pf3D7_09_v3	389355	398093	PF3D7_0908500	conserved Plasmodium protein, unknown function	-0.00558	0.009755	0.036285		0.024399	0.074489	-0.065065	0.074291	0.008811
Pf3D7_09_v3	398952	400975	PF3D7_0908600	ribosomal RNA methyltransferase, putative	0.019299	0.054463	0.042303		0.050194	0.018805	0.050967	0.053732	0.038538
Pf3D7_09_v3	401245	403644	PF3D7_0908700	tRNA pseudouridine synthase, putative	-0.010616	0.069276	0.006859		-0.039673	0.028539	-0.031573	0.127041	0.08851
Pf3D7_09_v3	404062	406403	PF3D7_0908800	mitochondrial carrier protein, putative	0.018238	0.123782	0.155359		-0.030543	0.019723	-0.016849	-0.025835	0.003995
Pf3D7_09_v3	406404	409915	PF3D7_0908900	conserved Plasmodium protein, unknown function	0.019094	0.078319	-0.002787		0.120608	0.005086	0.017592	0.109787	0.049798
Pf3D7_09_v3	410076	414091	PF3D7_0909000	conserved Plasmodium protein, unknown function	-0.016527	-0.02434	-0.053545		0.049547	0.090363	0.036866	0.127688	0.036559
Pf3D7_09_v3	414955	417683	PF3D7_0909100	conserved Plasmodium membrane protein, unknown function	-0.005147	-0.035844	-0.033747		0.038876	0.005801	-0.042991	0.016022	0.00391
Pf3D7_09_v3	417958	420145	PF3D7_0909200	GDP-fucose protein O-fucosyltransferase 2	0.021967	-0.083273	-0.035131		0.120512	0.078414	0.091102	0.184317	2.3e-05
Pf3D7_09_v3	420235	421932	PF3D7_0909300	apoptosis-related protein	-0.045131	0.117189	0.184503		0.079192	0.119494	0.073818	0.152872	0.025881
Pf3D7_09_v3	423921	428356	PF3D7_0909400	exoribonuclease, putative	-0.021588	0.016798	0.018921		0.032976	0.035289	-0.055696	0.010947	-0.031637
Pf3D7_09_v3	430328	432297	PF3D7_0909500	subpellicular microtubule protein 1, putative	0.026018	0.140261	0.154586		-0.084821	0.008351	-0.00778	0.121544	0.029815
Pf3D7_09_v3	432988	435623	PF3D7_0909600	conserved protein, unknown function	0.023677	-0.150739	-0.093768		0.065369	0.087518	-0.052362	0.006792	0.041384
Pf3D7_09_v3	440664	444274	PF3D7_0909700	FHA domain protein, putative	0.000479	0.009616	-0.0354		0.011866	0.090939	-0.104017	-0.040929	0.001655
Pf3D7_09_v3	445538	446579	PF3D7_0909800	small nuclear ribonucleoprotein Sm D3, putative	0.03389	-0.012877	-0.031979		0.108218	0.054369	0.130074	-0.033163	-0.057372
Pf3D7_09_v3	447678	452224	PF3D7_0909900	helicase SKI2W, putative	0.0015	0.027661	-0.060636		0.051708	0.049452	-0.014489	0.082053	0.013842
Pf3D7_09_v3	452225	455993	PF3D7_0910000	SET domain protein, putative	-0.011957	-0.031392	-0.049467		0.013955	-0.01243	-0.052913	0.01279	-0.013941
Pf3D7_09_v3	456709	461568	PF3D7_0910100	exportin-7, putative	-0.005073	0.010933	-0.066349		0.07565	0.092469	0.017786	0.085386	0.091688
Pf3D7_09_v3	464309	474018	PF3D7_0910200	conserved Plasmodium protein, unknown function	-0.009113	-0.003291	-0.000929		0.080439	0.065754	0.066447	0.063406	0.039852
Pf3D7_09_v3	475421	477219	PF3D7_0910300	conserved protein, unknown function	-0.02704	-0.047591	0.083069		0.027232	0.055446	0.001316	0.147209	-0.081353
Pf3D7_09_v3	477527	481608	PF3D7_0910400	selenide water dikinase, putative	-0.000408	0.005771	-0.029024		-0.051921	-0.007779	-0.009984	0.036163	-0.063662
Pf3D7_09_v3	482211	487804	PF3D7_0910500	DNA repair protein REV1, putative	0.011929	-0.025121	-0.093417		0.017072	0.017288	-0.09697	-0.04889	0.007258
Pf3D7_09_v3	489217	491070	PF3D7_0910600	SNARE protein	0.029831	-0.011949	0.034579		0.035847	0.023192	0.102882	0.11801	0.103831
Pf3D7_09_v3	491071	493156	PF3D7_0910700	actin-like protein, putative	0.020055	-0.08854	0.020127		0.025087	0.001595	-0.116997	0.040477	-0.039945
Pf3D7_09_v3	493913	495726	PF3D7_0910800	cytosolic Fe-S cluster assembly factor NBP35, putative	-0.028923	-0.080748	-0.100638		0.025416	-0.004566	-0.074345	-0.043859	-0.033066
Pf3D7_09_v3	495727	497977	PF3D7_0910900	DNA primase large subunit, putative	0.016034	-0.022403	0.064679		0.032632	0.048625	0.088731	0.041387	0.06806
Pf3D7_09_v3	499933	502983	PF3D7_0911000	phosphatidylinositol N-acetylglucosaminyltransferase, putative	-0.002837	-0.023119	0.030084		0.013415	0.095111	0.010876	0.083493	0.09101
Pf3D7_09_v3	504162	508380	PF3D7_0911100	conserved protein, unknown function	-0.010235	-0.056818	-0.047674		0.073838	0.031596	0.002513	-0.029107	0.06197
Pf3D7_09_v3	511247	521779	PF3D7_0911300	cysteine repeat modular protein 1	-0.004835	0.031947	-0.022277		0.003231	0.03608	-0.029917	0.03608	0.009
Pf3D7_09_v3	521971	526268	PF3D7_0911400	conserved Plasmodium protein, unknown function	0.029847	-0.016072	-0.048715		0.047395	0.006292	0.058972	0.037046	-0.029528
Pf3D7_09_v3	526690	528228	PF3D7_0911500	conserved Plasmodium protein, unknown function	0.003765	0.010257	-0.02672		0.035459	0.072567	-0.095771	0.020132	-0.021175
Pf3D7_09_v3	529662	531694	PF3D7_0911600	conserved Plasmodium protein, unknown function	-0.050351	-0.033957	0.008739		-0.011285	-0.007142	0.018225	0.047728	-0.041723
Pf3D7_09_v3	532091	535724	PF3D7_0911700	GTP-binding protein, putative	0.008194	-0.000787	0.050864		-0.011396	-0.021027	-0.051273	-0.012594	0.018685
Pf3D7_09_v3	535725	536931	PF3D7_0911800	conserved Plasmodium protein, unknown function	-0.04999	0.131564	0.066592		0.034274	0.030975	-0.045221	0.023643	0.122475
Pf3D7_09_v3	537971	540122	PF3D7_0911900	falstatin	-0.010949	0.063326	0.186479		-0.041628	-0.022059	-0.005368	-0.024995	0.00223
Pf3D7_09_v3	540783	545989	PF3D7_0912000	conserved Plasmodium protein, unknown function	0.009504	-0.034438	-0.050437		0.036131	0.01747	0.006157	0.03324	-0.023765
Pf3D7_09_v3	546550	548351	PF3D7_0912100	zinc finger protein, putative	0.006531	0.09784	0.060869		0.011731	-0.051381	0.105279	-0.000437	0.033988
Pf3D7_09_v3	548835	550696	PF3D7_0912200	conserved protein, unknown function	-0.017503	0.047932	-0.020927		0.082307	0.196191	0.087772	0.135908	0.177545
Pf3D7_09_v3	551176	553417	PF3D7_0912400	alkaline phosphatase, putative	-0.00067	0.018379	-0.00921		0.009045	-0.014176	0.110689	-0.022445	0.008073
Pf3D7_09_v3	555840	558208	PF3D7_0912500	SAP domain-containing protein, putative	0.004469	-0.04746	-0.054558		0.097088	0.113205	0.006541	0.067979	0.122507
Pf3D7_09_v3	558894	562229	PF3D7_0912600	conserved Plasmodium protein, unknown function	-0.033775	-0.030096	-0.012054		0.025336	0.069436	-0.021006	-0.025556	0.075267
Pf3D7_09_v3	563132	565429	PF3D7_0912800	tRNA (adenine(58)-N(1))-methyltransferase non-catalytic subunit TRM6, putative	-0.028832	-0.009737	0.005679		-0.037249	-0.012094	0.042345	-0.015215	0.087092
Pf3D7_09_v3	567033	568882	PF3D7_0912900	26S proteasome regulatory subunit RPN8, putative	0.034543	-0.091576	-0.100929		0.00202	0.030878	-0.125273	-0.061072	-0.053392
Pf3D7_09_v3	568883	570624	PF3D7_0913000	conserved protein, unknown function	-0.003717	0.047386	0.034453		-0.032374	-0.024812	-0.065741	-0.050721	-0.025865
Pf3D7_09_v3	570781	573599	PF3D7_0913100	heptatricopeptide repeat-containing protein, putative	0.027199	0.050104	0.018293		-0.058497	-0.119189	-0.110286	-0.102886	-0.073804
Pf3D7_09_v3	575429	576734	PF3D7_0913200	elongation factor 1-beta	-0.001326	-0.086289	-0.032844		0.018885	0.095951	0.052106	-0.020285	0.060761
Pf3D7_09_v3	576735	579276	PF3D7_0913300	conserved protein, unknown function	-0.018656	-0.045951	0.035229		-0.071173	-0.014646	-0.008951	-0.030677	-0.096389
Pf3D7_09_v3	580510	581718	PF3D7_0913400	conserved Plasmodium protein, unknown function	0.023419	0.029007	-0.04128		-0.017656	0.071822	-0.085881	-0.029809	0.11894
Pf3D7_09_v3	582090	584218	PF3D7_0913500	protease, putative	-0.024475	0.091338	-0.011774		-0.084671	0.033166	-0.155892	-0.19494	-0.067172
Pf3D7_09_v3	584476	588671	PF3D7_0913600	conserved Plasmodium protein, unknown function	0.00212	0.055515	0.012579		0.031694	0.003615	-0.014118	0.070425	-0.017275
Pf3D7_09_v3	589013	591492	PF3D7_0913700	conserved Plasmodium protein, unknown function	-0.061202	-0.026792	-0.006119		-0.061014	-0.044941	-0.036515	-0.033332	-0.056767
Pf3D7_09_v3	592857	593806	PF3D7_0913800	conserved Plasmodium protein, unknown function	-0.053068	0.098391	0.114945		0.039745	-0.063852	-0.002773	0.085633	-0.014683
Pf3D7_09_v3	594022	597464	PF3D7_0913900	arginine--tRNA ligase, putative	-0.013133	-0.008525	-0.012152		0.025005	-0.001979	0.034609	-0.037464	0.049295
Pf3D7_09_v3	597465	600811	PF3D7_0914000	pseudouridylate synthase, putative	-0.008452	-0.047846	-0.057927		0.004601	-0.032159	0.02101	-0.012451	0.016832
Pf3D7_09_v3	600826	604826	PF3D7_0914100	conserved Plasmodium protein, unknown function	-0.007008	-0.001091	0.047216		0.078306	0.055621	0.026027	-0.0294	0.076094
Pf3D7_09_v3	608111	610325	PF3D7_0914200	phospholipid or glycerol acyltransferase, putative	0.021835	0.039889	-0.028281		-0.010558	-0.02216	0.011488	0.037393	-0.095734
Pf3D7_09_v3	612726	615742	PF3D7_0914300	met-10+ like protein, putative	0.008654	-0.086979	-0.034218		0.017065	0.026016	-0.009151	0.00814	-0.038372
Pf3D7_09_v3	617713	620085	PF3D7_0914400	conserved protein, unknown function	-0.001711	0.051258	0.100214		0.067509	0.04611	-0.030645	0.111248	0.058602
Pf3D7_09_v3	620538	626399	PF3D7_0914500	conserved Plasmodium protein, unknown function	-0.010185	0.035436	0.021583		-0.017286	-0.017242	0.007486	-0.02591	0.015972
Pf3D7_09_v3	627504	628569	PF3D7_0914600	transcription elongation factor 1, putative	0.004469	0.080645	0.154009		0.005114	-0.010744	0.138825	0.024568	0.098091
Pf3D7_09_v3	630407	632457	PF3D7_0914700	major facilitator superfamily-related transporter, putative	0.018202	0.099584	-0.052709		-0.029149	0.017052	0.083318	0.039809	0.003648
Pf3D7_09_v3	633324	634450	PF3D7_0914800	GINS complex subunit Psf3, putative	-0.055257	-0.036828	0.108956		0.175858	0.167631	0.159788	0.067348	0.223087
Pf3D7_09_v3	636371	639000	PF3D7_0914900	BSD-domain protein, putative	-0.010278	-0.000204	0.026439		-0.006786	-0.003613	0.023469	-0.028587	0.040831
Pf3D7_09_v3	639408	641509	PF3D7_0915000	type II NADH:ubiquinone oxidoreductase	0.004819	-0.092855	-0.050501		0.066867	0.03728	0.123965	0.13557	0.075195
Pf3D7_09_v3	642982	644293	PF3D7_0915100	SUMO-conjugating enzyme UBC9	-0.003431	-0.040003	0.0792		0.093956	-0.02416	0.16223	0.103201	-0.027849
Pf3D7_09_v3	645382	646775	PF3D7_0915200	ribonuclease H2 subunit C, putative	0.003027	-0.137142	-0.118657		-0.056179	0.078467	-0.113544	0.0743	0.089699
Pf3D7_09_v3	646776	649366	PF3D7_0915300	heptatricopeptide repeat-containing protein, putative	0.010936	-0.020197	-0.027955		-0.030067	-0.00558	-0.038767	0.03614	0.012835
Pf3D7_09_v3	650335	655091	PF3D7_0915400	ATP-dependent 6-phosphofructokinase	-0.014323	0.033345	0.030692		-0.009689	0.062516	-0.014875	0.021616	0.063122
Pf3D7_09_v3	657168	659662	PF3D7_0915500	conserved Plasmodium protein, unknown function	-0.004902	0.094119	0.031866		0.024254	-0.059446	0.015435	-0.002136	-0.052541
Pf3D7_09_v3	661231	662576	PF3D7_0915700	cytochrome c oxidase subunit ApiCOX30, putative	-0.028224	0.158381	0.016931		0.075267	0.085219	0.173376	0.09482	0.021411
Pf3D7_09_v3	663668	664821	PF3D7_0915800	glycolipid transfer protein, putative	-0.05339	0.041063	0.049431		-0.048191	-0.05381	-0.089631	-0.089971	-0.032189
Pf3D7_09_v3	667005	671975	PF3D7_0916000	major facilitator superfamily domain-containing protein, putative	0.01157	0.022314	0.005724		-0.002842	0.024775	-0.038057	0.0716	0.071574
Pf3D7_09_v3	673818	675407	PF3D7_0916100	thioredoxin 3	-0.004044	0.114198	0.207501		-0.049799	-0.038014	-0.000276	0.073737	-0.085795
Pf3D7_09_v3	675672	679882	PF3D7_0916200	conserved Plasmodium protein, unknown function	0.043315	0.066978	-0.006658		-0.027359	0.006552	-0.094857	-0.012911	0.026821
Pf3D7_09_v3	679981	682234	PF3D7_0916300	conserved Plasmodium protein, unknown function	-0.013501	0.122368	0.06044		-0.079788	0.130491	0.057358	0.103724	0.110182
Pf3D7_09_v3	683312	691344	PF3D7_0916400	conserved Plasmodium protein, unknown function	-0.000891	0.146887	-0.020487		-0.059684	-0.01204	-0.056192	-0.025704	-0.036275
Pf3D7_09_v3	691345	693820	PF3D7_0916500	ubiquitin fusion degradation protein 1	-0.016473	0.099673	0.108674		-0.052478	0.084198	-0.03637	0.128477	0.016427
Pf3D7_09_v3	694355	695514	PF3D7_0916600	methyltransferase, putative	0.016828	-0.134555	-0.241156		0.083694	-0.165146	-0.003061	-0.001129	-0.140988
Pf3D7_09_v3	696613	698279	PF3D7_0916700	RNA-binding protein musashi, putative	0.047799	0.013859	-0.035209		0.00215	-0.046983	-0.026116	-0.030366	-0.029431
Pf3D7_09_v3	705107	706473	PF3D7_0916900	zinc finger protein, putative	0.037476	0.050251	0.07602		-0.021724	-0.063524	-0.013444	-0.029378	0.010001
Pf3D7_09_v3	706474	712322	PF3D7_0917000	merozoite organizing protein	0.016339	0.027092	0.047139		0.032657	0.054512	0.029926	0.014304	0.035156
Pf3D7_09_v3	712966	715739	PF3D7_0917100	N-glycosylase/DNA lyase, putative	-0.037156	0.135755	0.06514		-0.041254	0.063985	0.02147	0.021085	-0.007527
Pf3D7_09_v3	716075	717756	PF3D7_0917200	conserved protein, unknown function	-0.026279	0.013355	0.023045		0.098987	0.073095	0.096306	0.099495	0.097688
Pf3D7_09_v3	718271	719790	PF3D7_0917300	conserved protein, unknown function	0.000159	-0.061422	-0.038461		-0.056291	-0.001405	-0.02636	0.068528	-0.073178
Pf3D7_09_v3	720740	725115	PF3D7_0917400	conserved Plasmodium protein, unknown function	0.012284	-0.030829	-0.020668		-0.017994	0.012361	-0.034742	-0.003331	-0.013792
Pf3D7_09_v3	726453	728998	PF3D7_0917500	conserved protein, unknown function	-0.002587	-0.028327	-0.004066		0.053045	0.059331	-0.016711	0.015615	-0.005507
Pf3D7_09_v3	729424	732386	PF3D7_0917600	pre-mRNA-splicing factor ATP-dependent RNA helicase PRP43, putative	-0.013124	-0.002624	0.005108		0.087166	0.020948	0.031933	0.093365	0.032419
Pf3D7_09_v3	732701	734277	PF3D7_0917700	GPN-loop GTPase, putative	0.011676	-0.036719	0.010934		-0.121709	-0.137375	0.026173	-0.112078	-0.277727
Pf3D7_09_v3	734379	736192	PF3D7_0917800	conserved Plasmodium protein, unknown function	0.010212	0.103477	0.083471		0.054951	0.020391	-0.088823	0.056011	-0.019294
Pf3D7_09_v3	737735	740526	PF3D7_0917900	heat shock protein 70	0.020429	-0.121686	-0.108403		0.031561	-0.054501	-0.019168	0.055403	0.013852
Pf3D7_09_v3	742244	743934	PF3D7_0918000	glideosome-associated protein 50	-0.025177	-0.167494	-0.124503		0.163004	0.091872	0.003554	0.022353	0.040658
Pf3D7_09_v3	746923	748584	PF3D7_0918100	cytochrome b5-like heme/steroid binding protein, putative	-0.005014	0.045305	0.066742		0.102607	0.083874	0.086323	0.051969	0.027602
Pf3D7_09_v3	748585	750512	PF3D7_0918200	50S ribosomal protein L3, apicoplast, putative	-0.035239	0.038211	-0.043637		0.087569	0.08006	0.097246	0.058212	0.01833
Pf3D7_09_v3	751108	752672	PF3D7_0918300	eukaryotic translation initiation factor 3 subunit F, putative	0.037523	-0.043314	0.043776		0.032817	-0.065706	0.026692	-0.039176	-0.08418
Pf3D7_09_v3	754047	760519	PF3D7_0918400	conserved Plasmodium protein, unknown function	-0.012472	0.038387	0.04639		0.022883	0.031581	-0.009231	0.038253	-0.025415
Pf3D7_09_v3	760961	763608	PF3D7_0918500	telomerase RNA	0.001	0.030152	0.037824		0.240329	0.214612	0.174459	0.182447	0.19649
Pf3D7_09_v3	764598	767284	PF3D7_0918600	ATP-dependent DNA helicase Q1	0.021806	-0.069798	-0.066028		0.030794	0.040869	0.036304	0.007234	-0.016659
Pf3D7_09_v3	769202	772355	PF3D7_0918700	conserved Plasmodium protein, unknown function	0.021104	0.007779	0.082993		-0.049427	-0.044696	0.027328	0.026426	-0.103295
Pf3D7_09_v3	772396	774629	PF3D7_0918800	dihydrouridine synthase, putative	-0.00715	0.086917	-0.018956		-0.021442	-0.018755	0.043993	0.03292	-0.044578
Pf3D7_09_v3	777308	780999	PF3D7_0918900	gamma-glutamylcysteine synthetase	0.008282	0.007193	0.058857		-0.019166	-0.034776	0.040856	-0.005493	-0.002205
Pf3D7_09_v3	781118	782925	PF3D7_0919000	nucleosome assembly protein	-0.020433	0.11216	0.076862		-0.034791	-0.018738	0.051121	0.016418	0.103909
[truncated: 2,812 more rows]
