# Supplementary material for: Reaction hijacking inhibition of Plasmodium falciparum asparagine tRNA synthetase
Source: Research Square preprint supplement (doi:10.21203/rs.3.rs-3198291/v1), 2023-07-27

**Nature Communications**

***Supplementary Materials for***

**Reaction hijacking inhibition of *P. falciparum* asparagine tRNA synthetase**

Stanley C. Xie *et al*.

Corresponding authors: Elizabeth Winzeler (ewinzeler@health.ucsd.edu), Michael Griffin (mgriffin@unimelb.edu.au), Matthew Todd (matthew.todd@ucl.ac.uk), Leann Tilley (ltilley@unimelb.edu.au)

**Spectra for compounds synthesized in this work:**

**OSM-S-106:**

**OSM-E-32:**

**OSM-S-488:**

**OSM-LO-80:**

**OSM-LO-81:**

**OSM-S-137:**

**
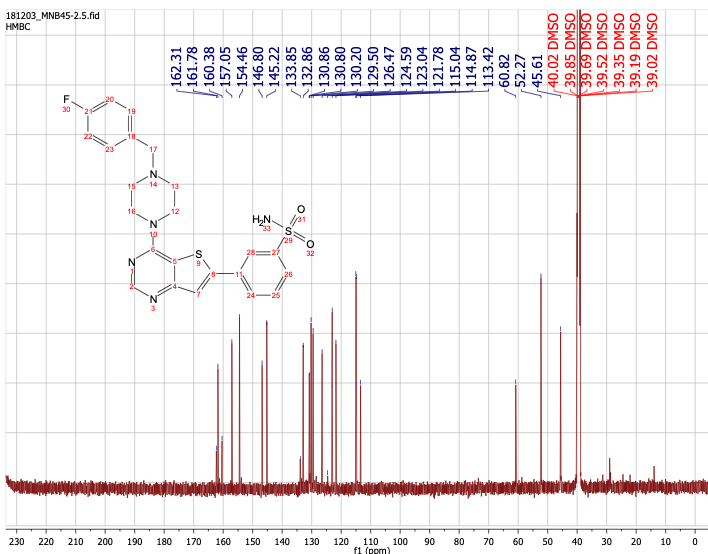
**

**OSM-LO-87:**

**OSM-LO-88:**

**OSM-S-106-Asn adduct:**

**
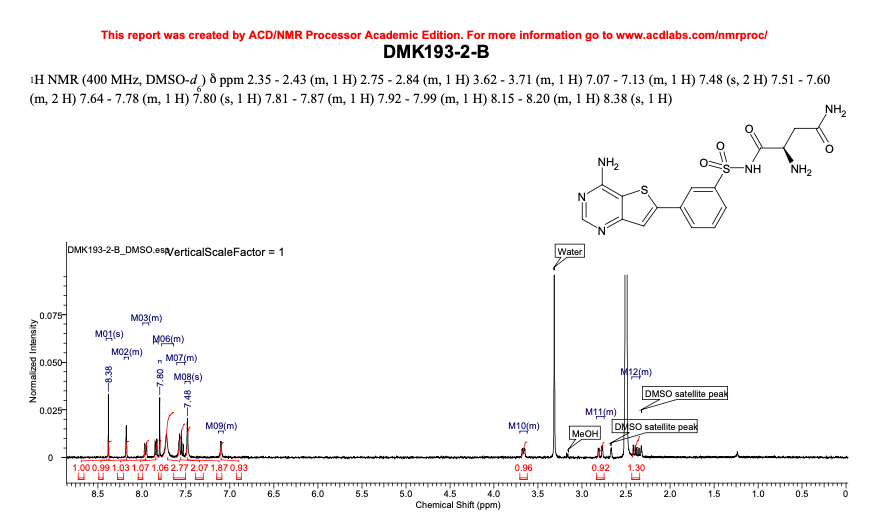
**

**
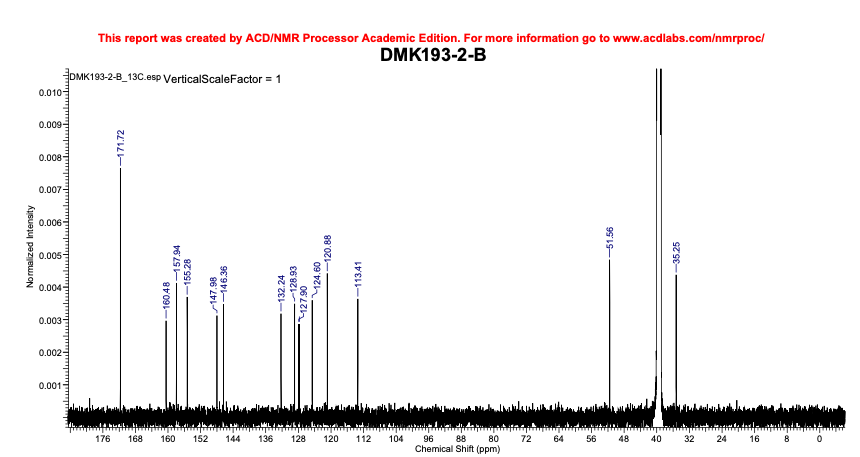
**

**Asn-AMS adduct:**


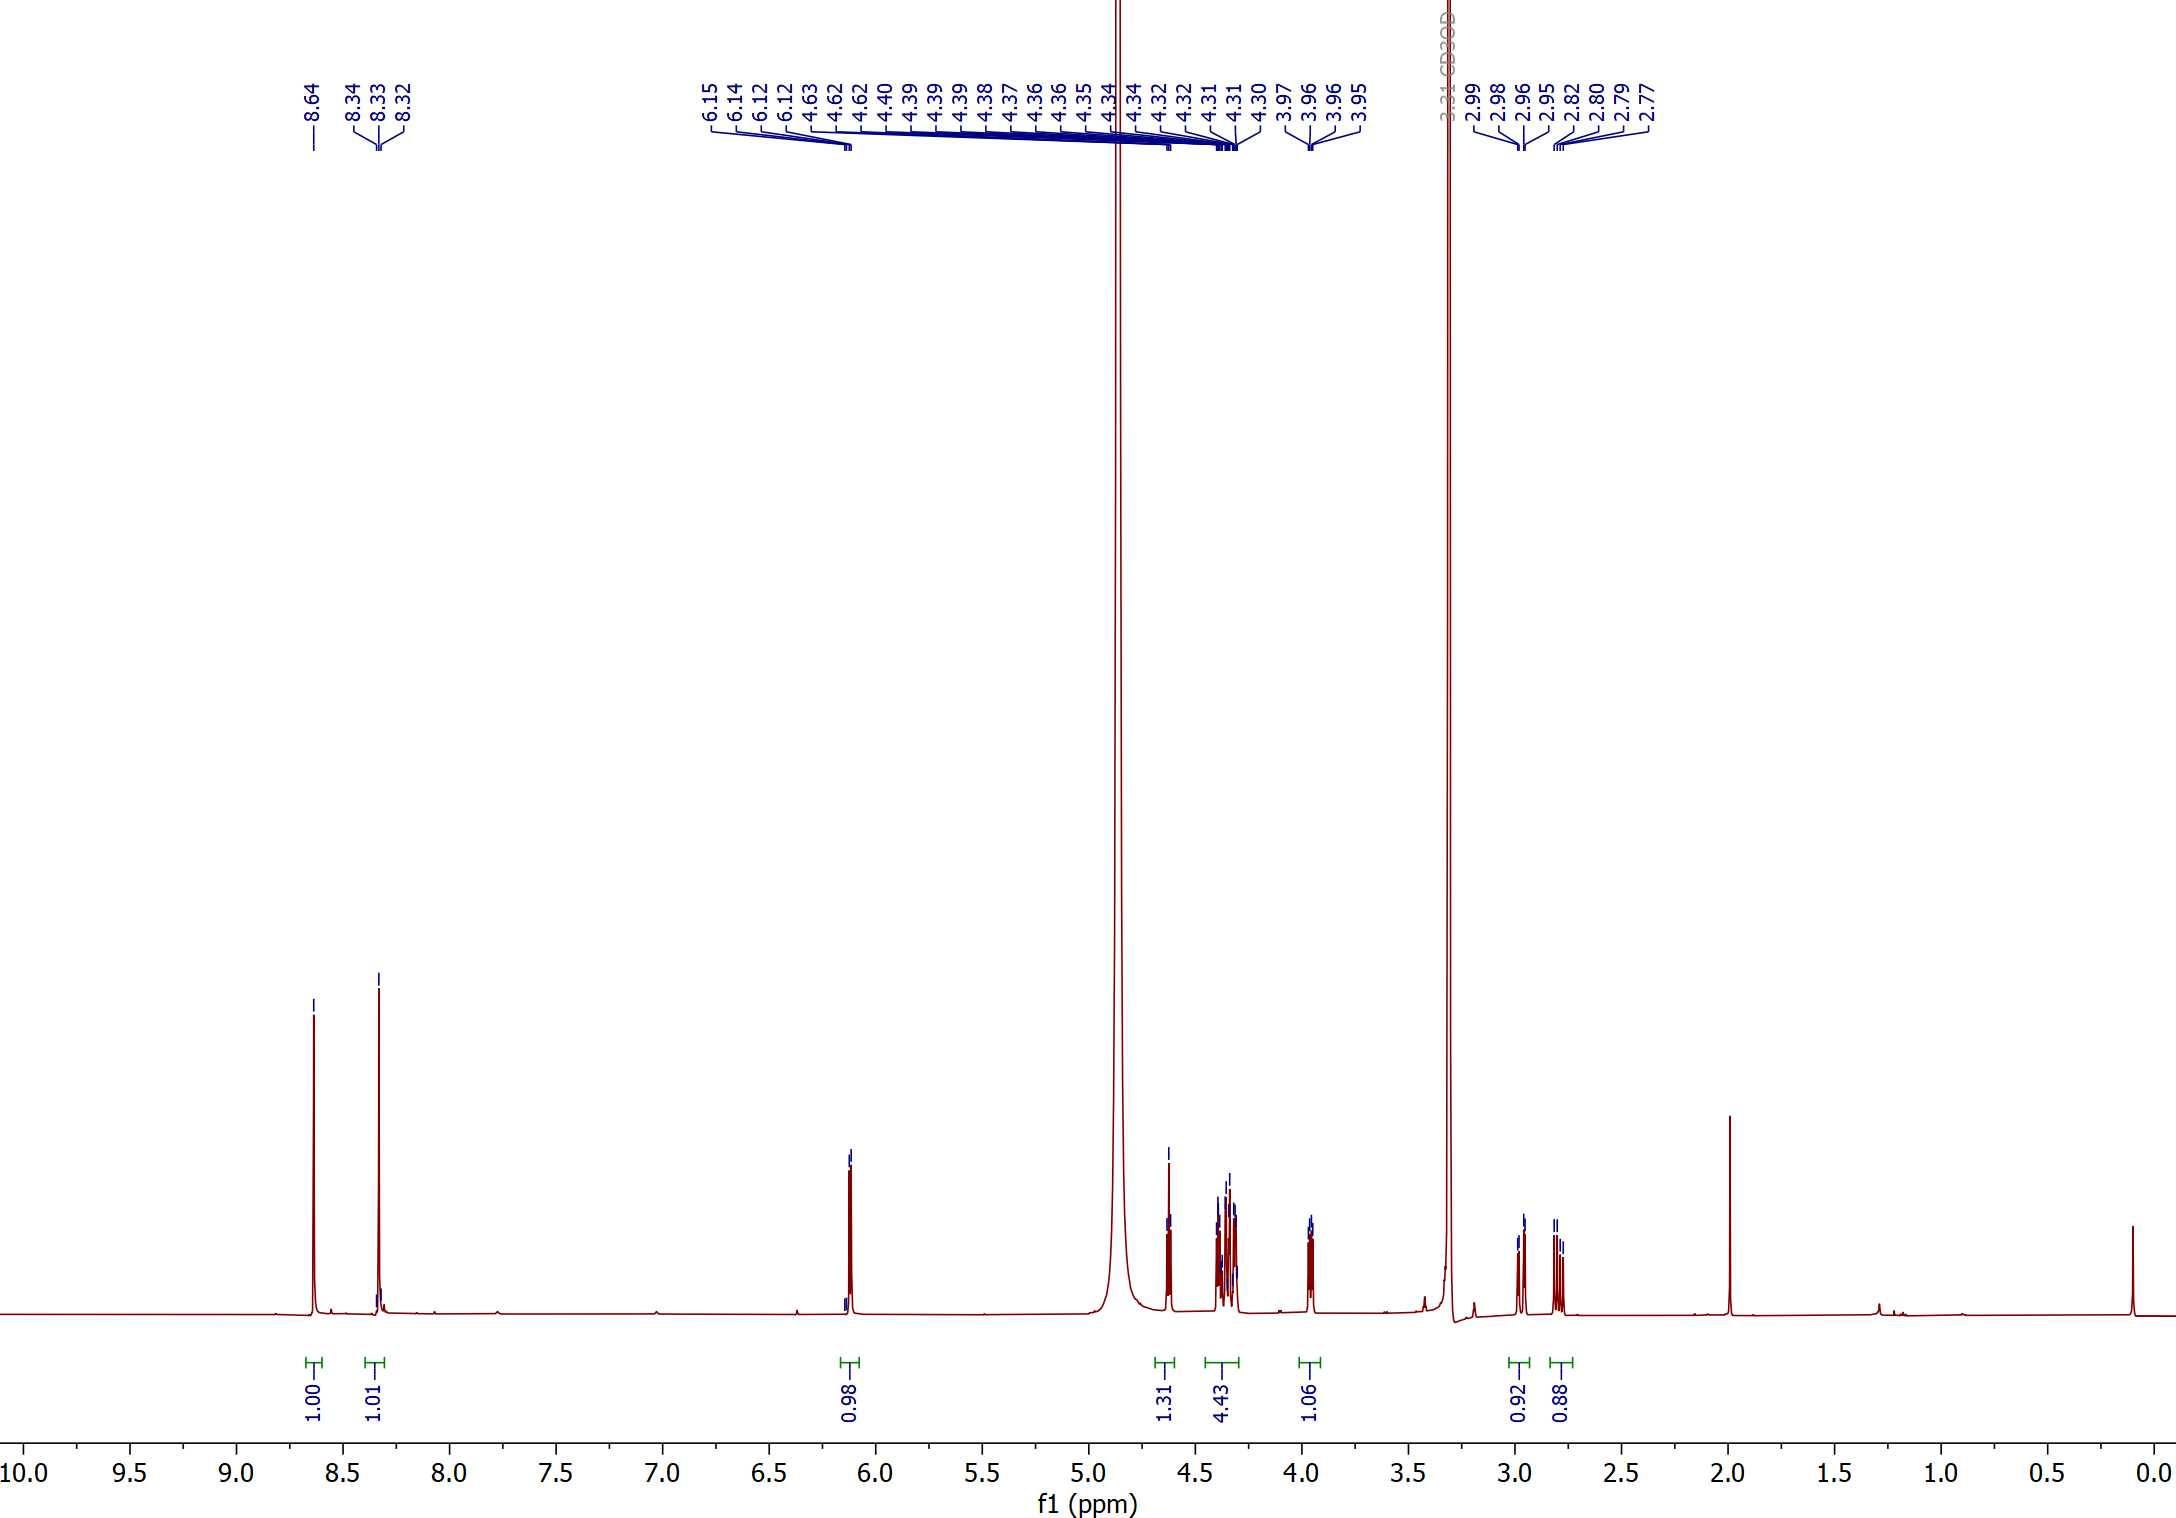


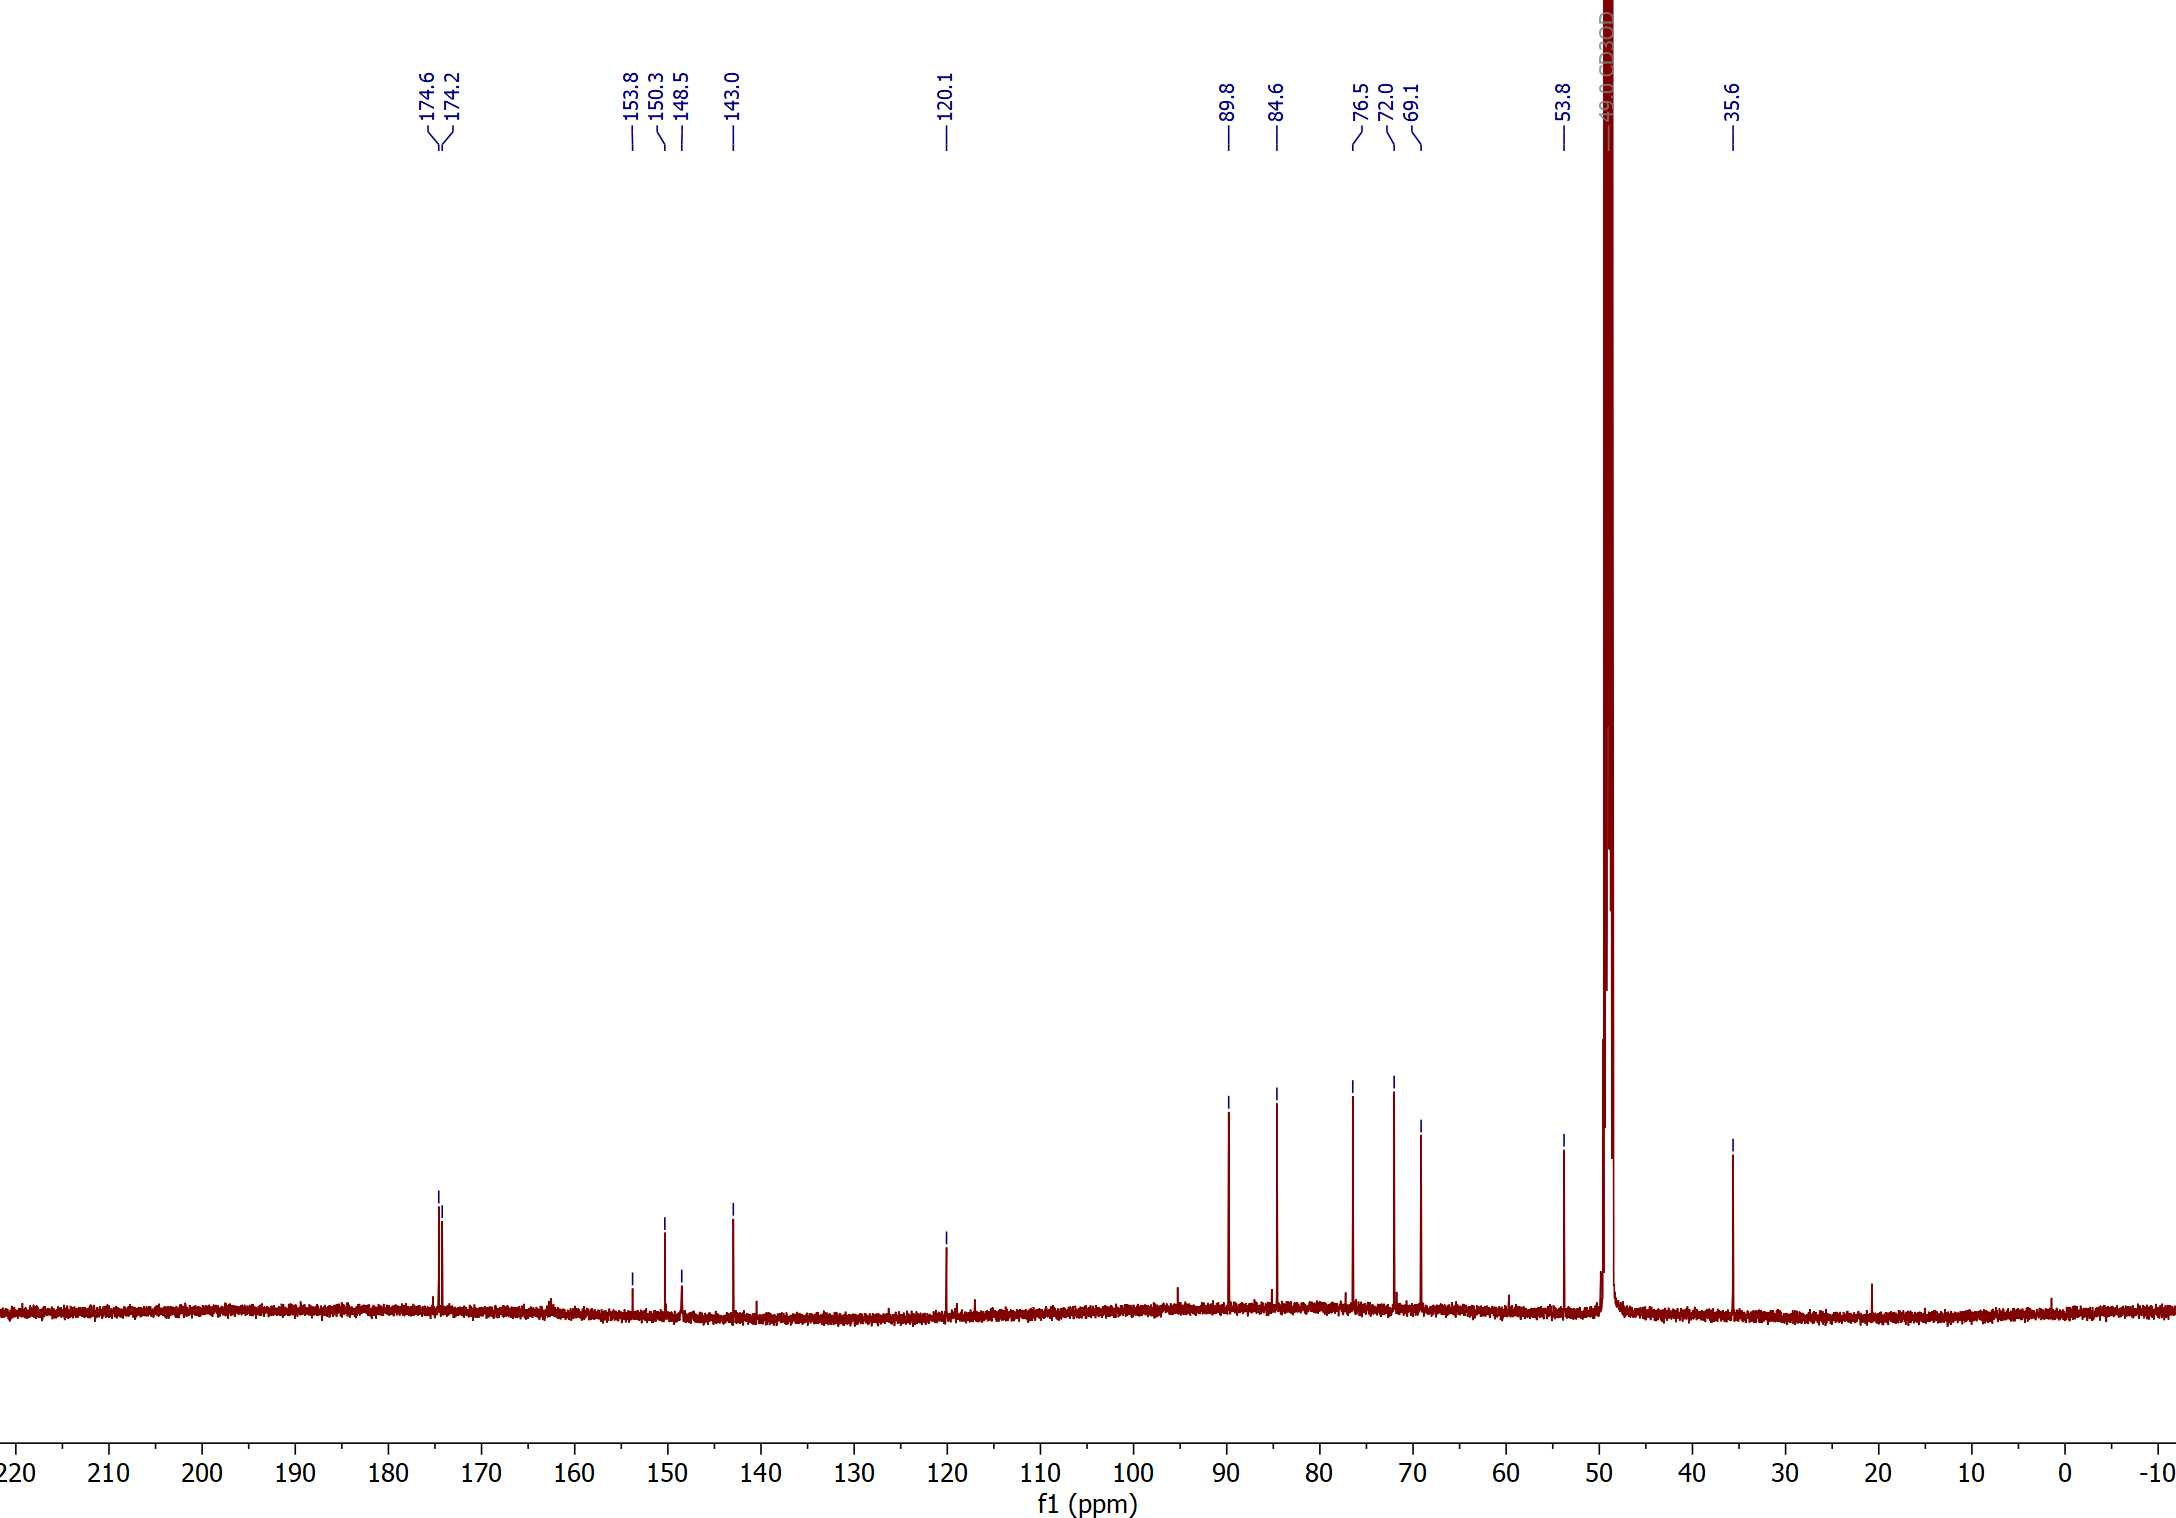


**Asn-OSM-S-106：**


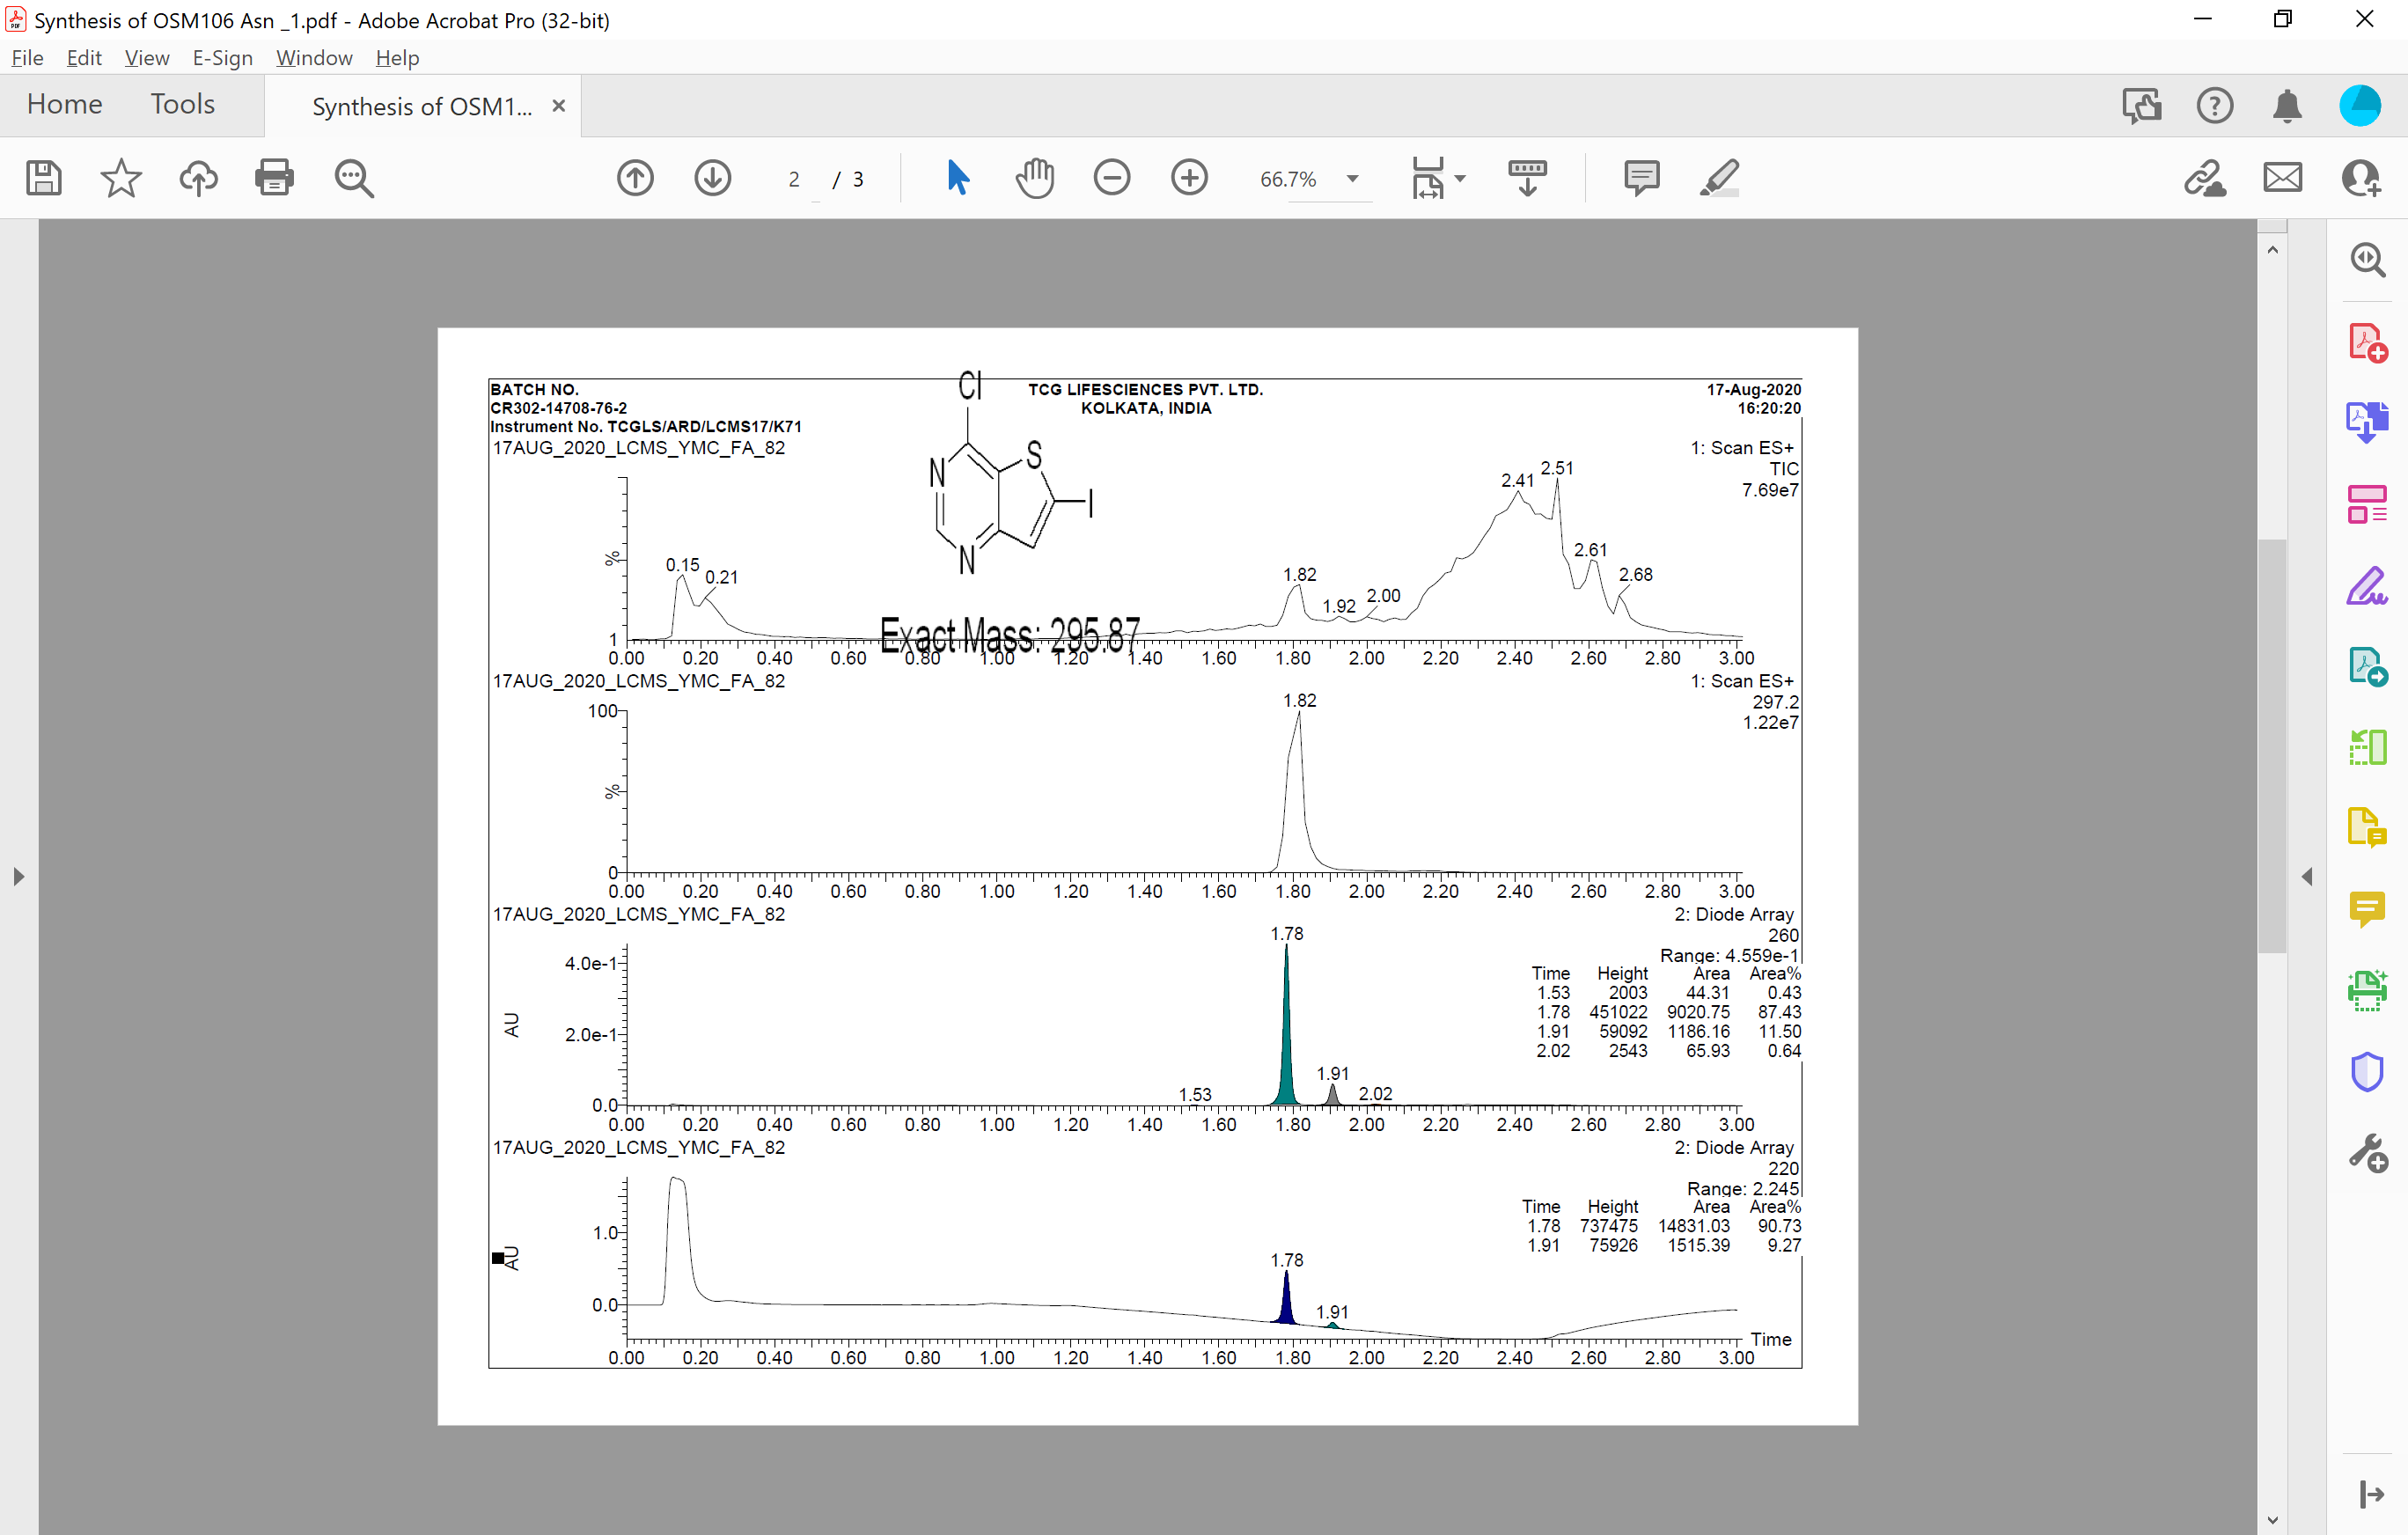

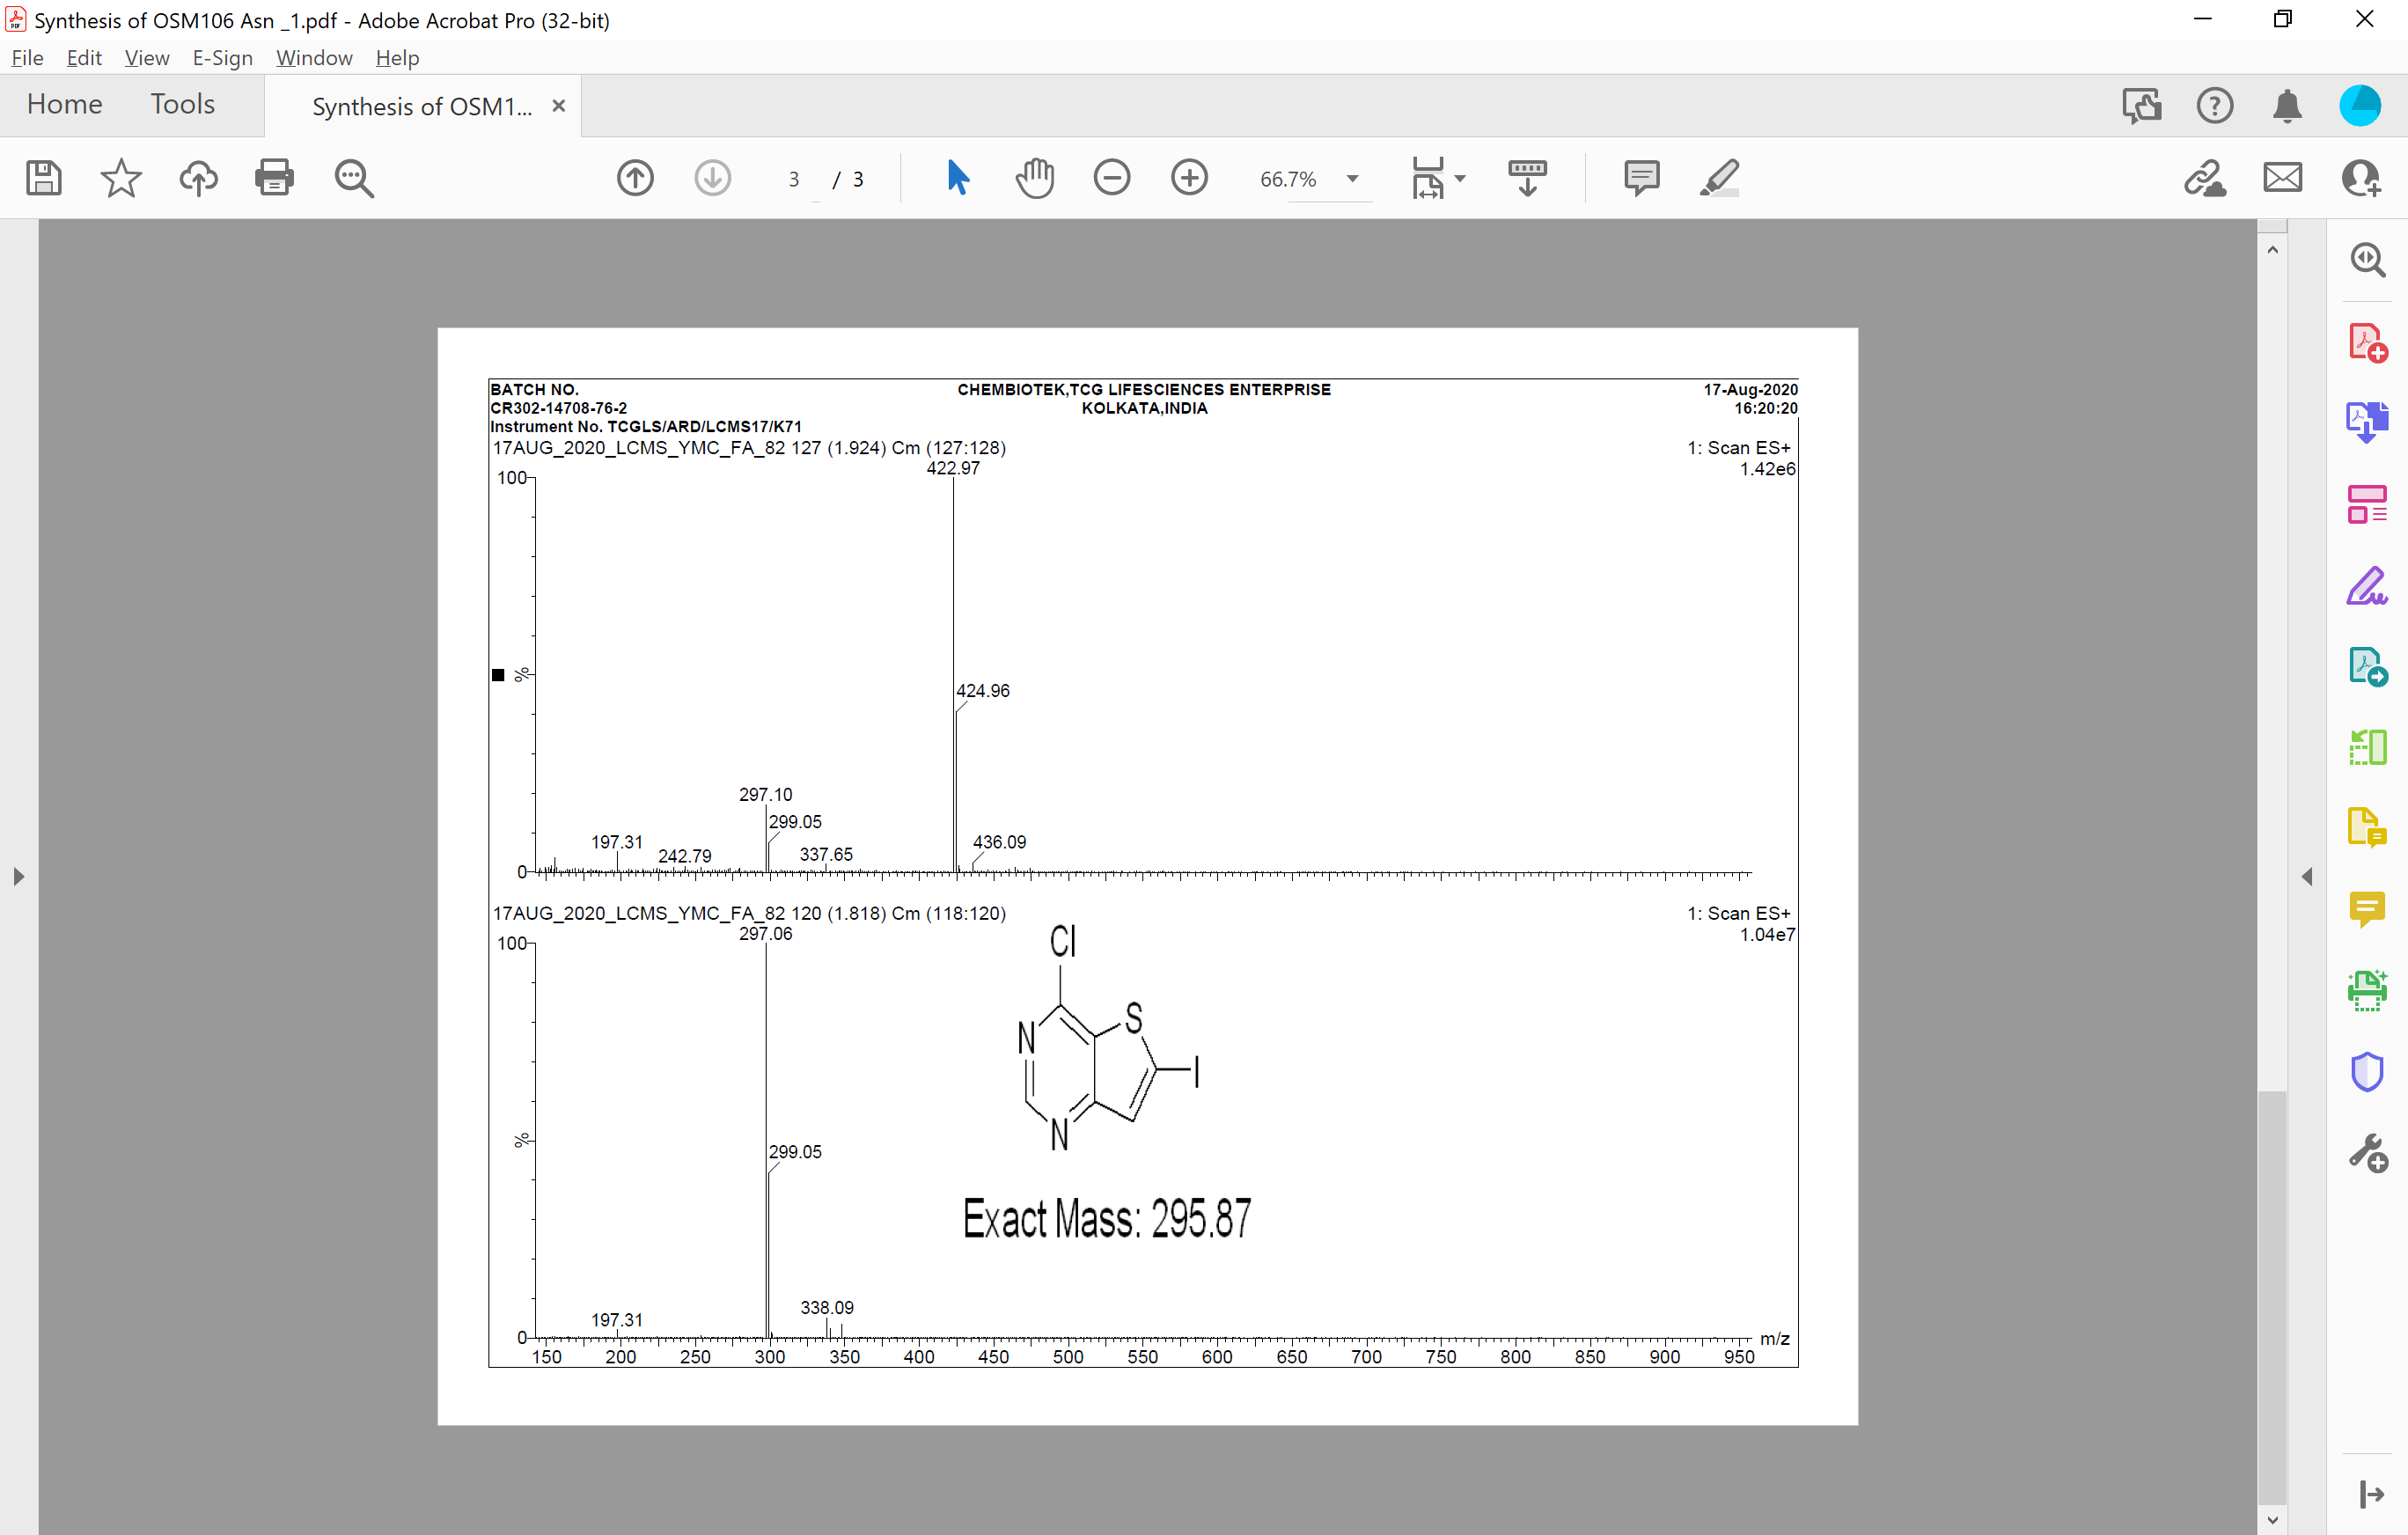

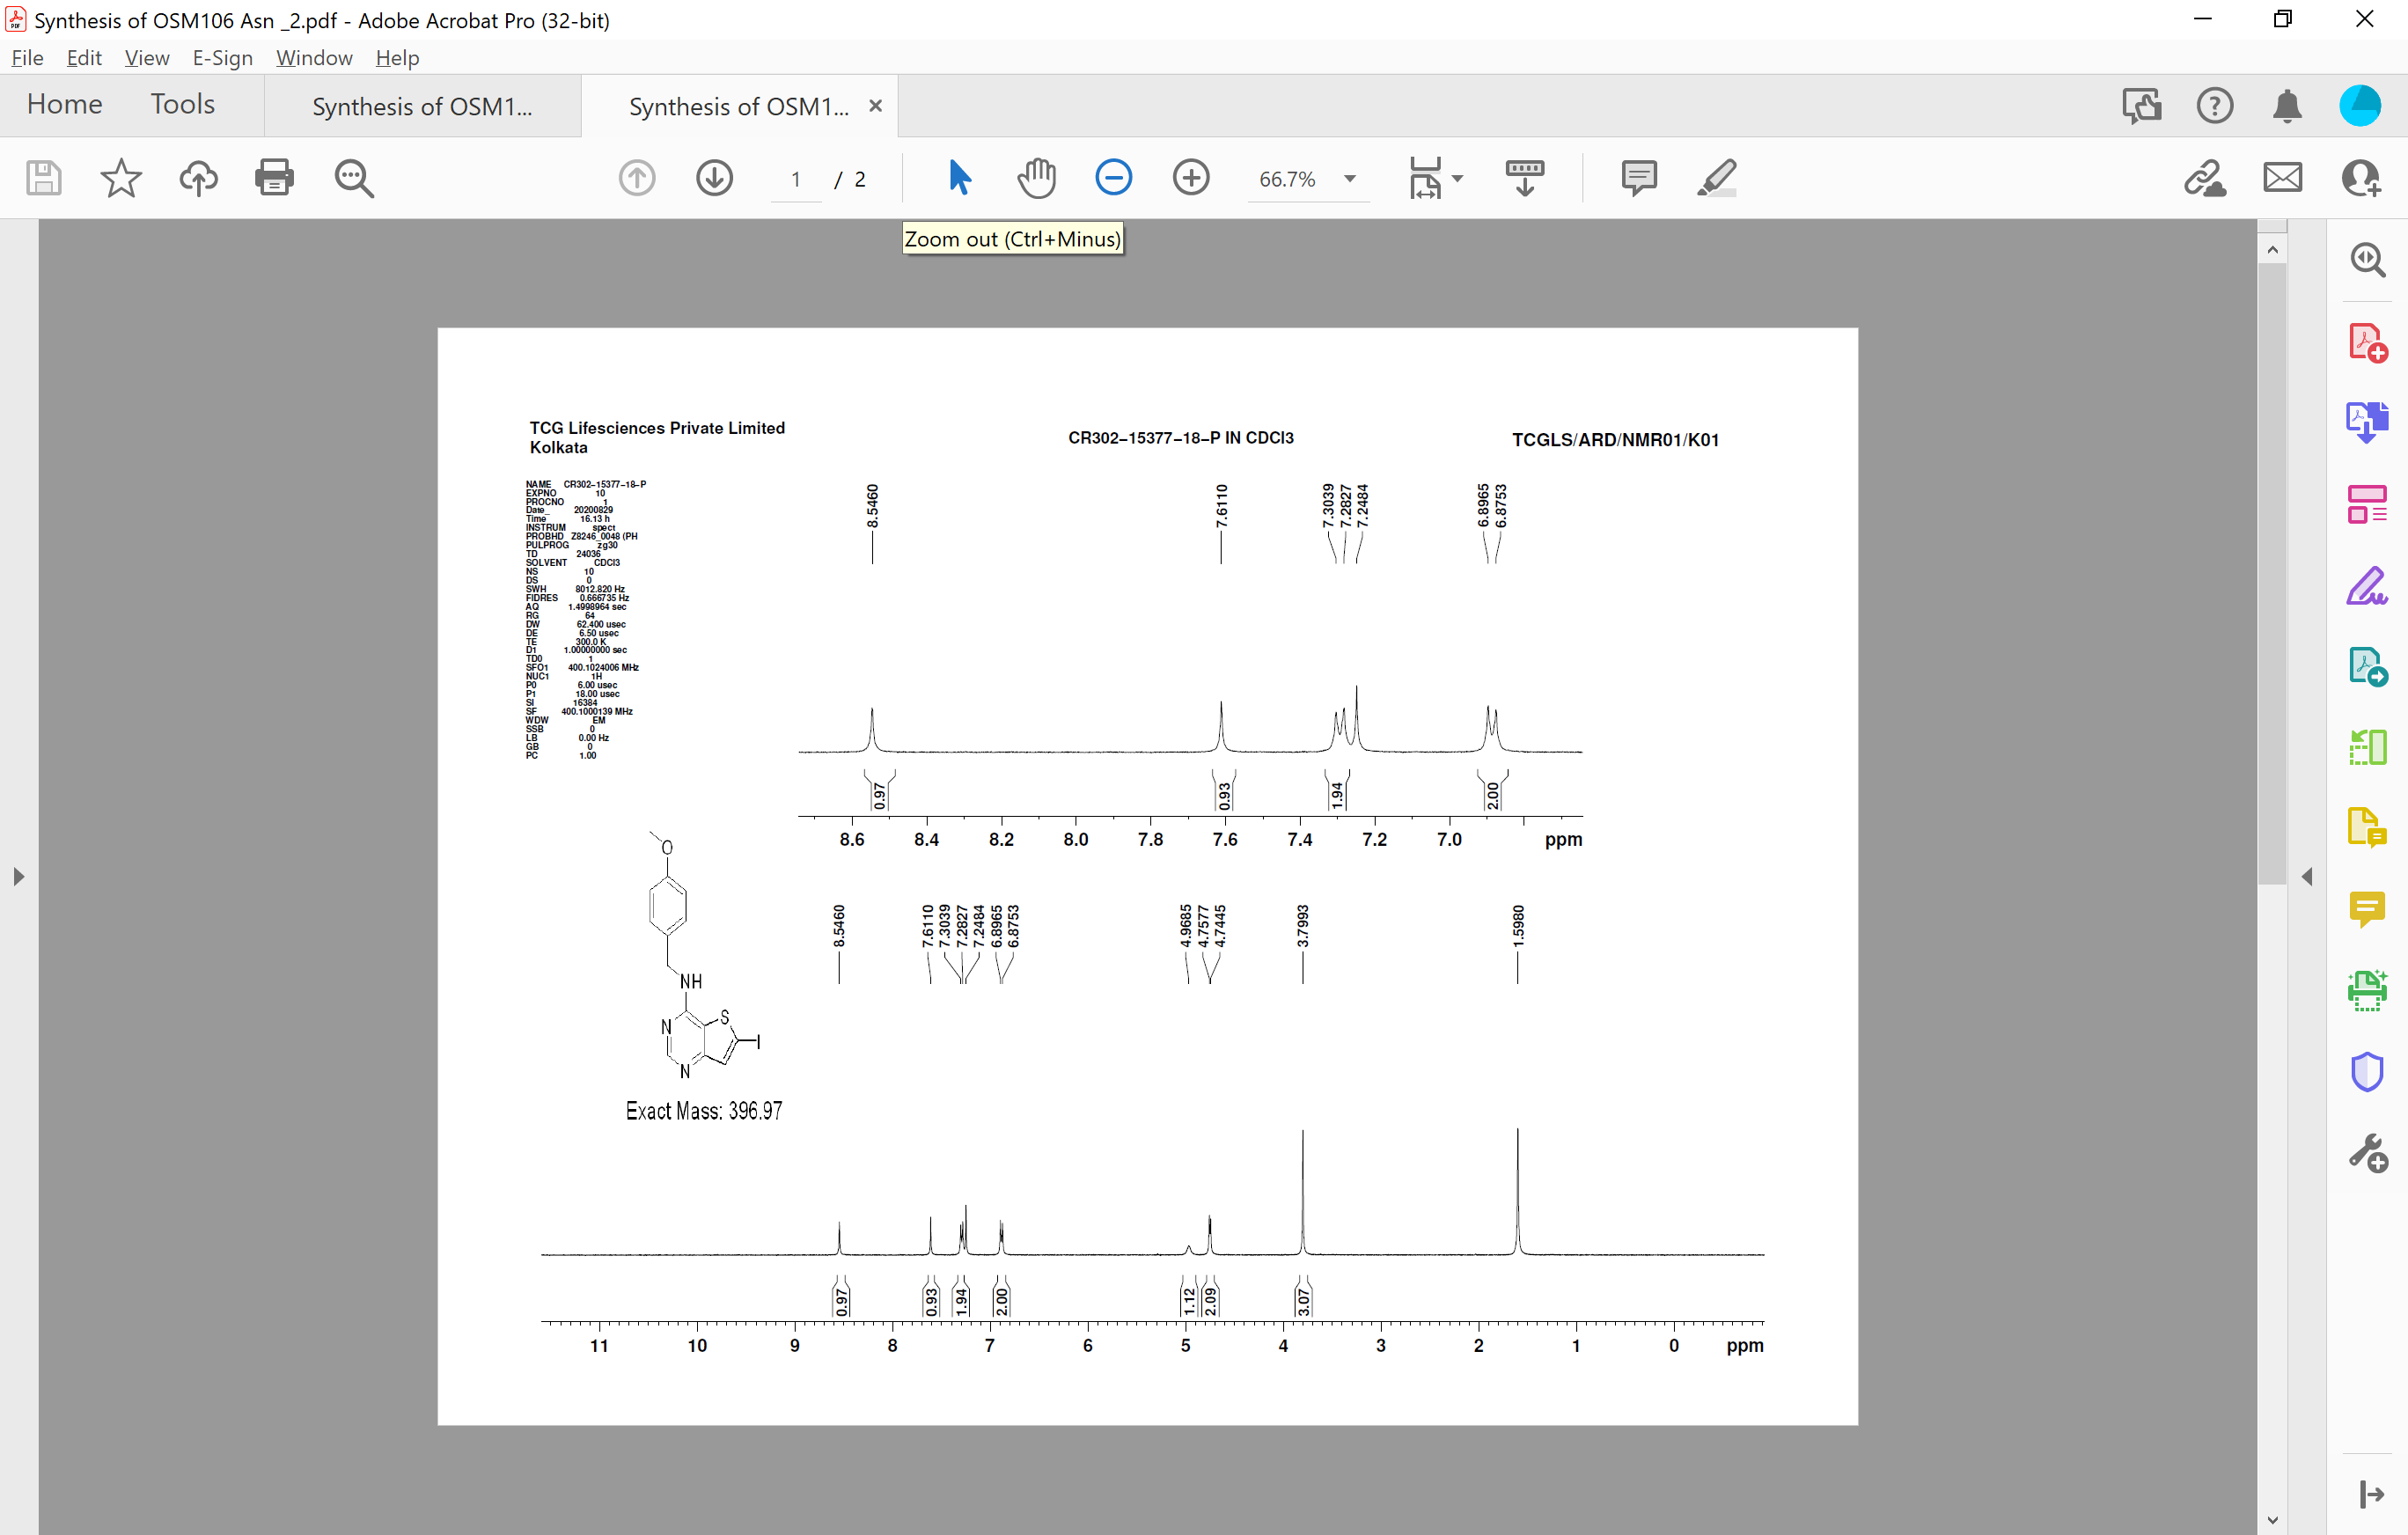

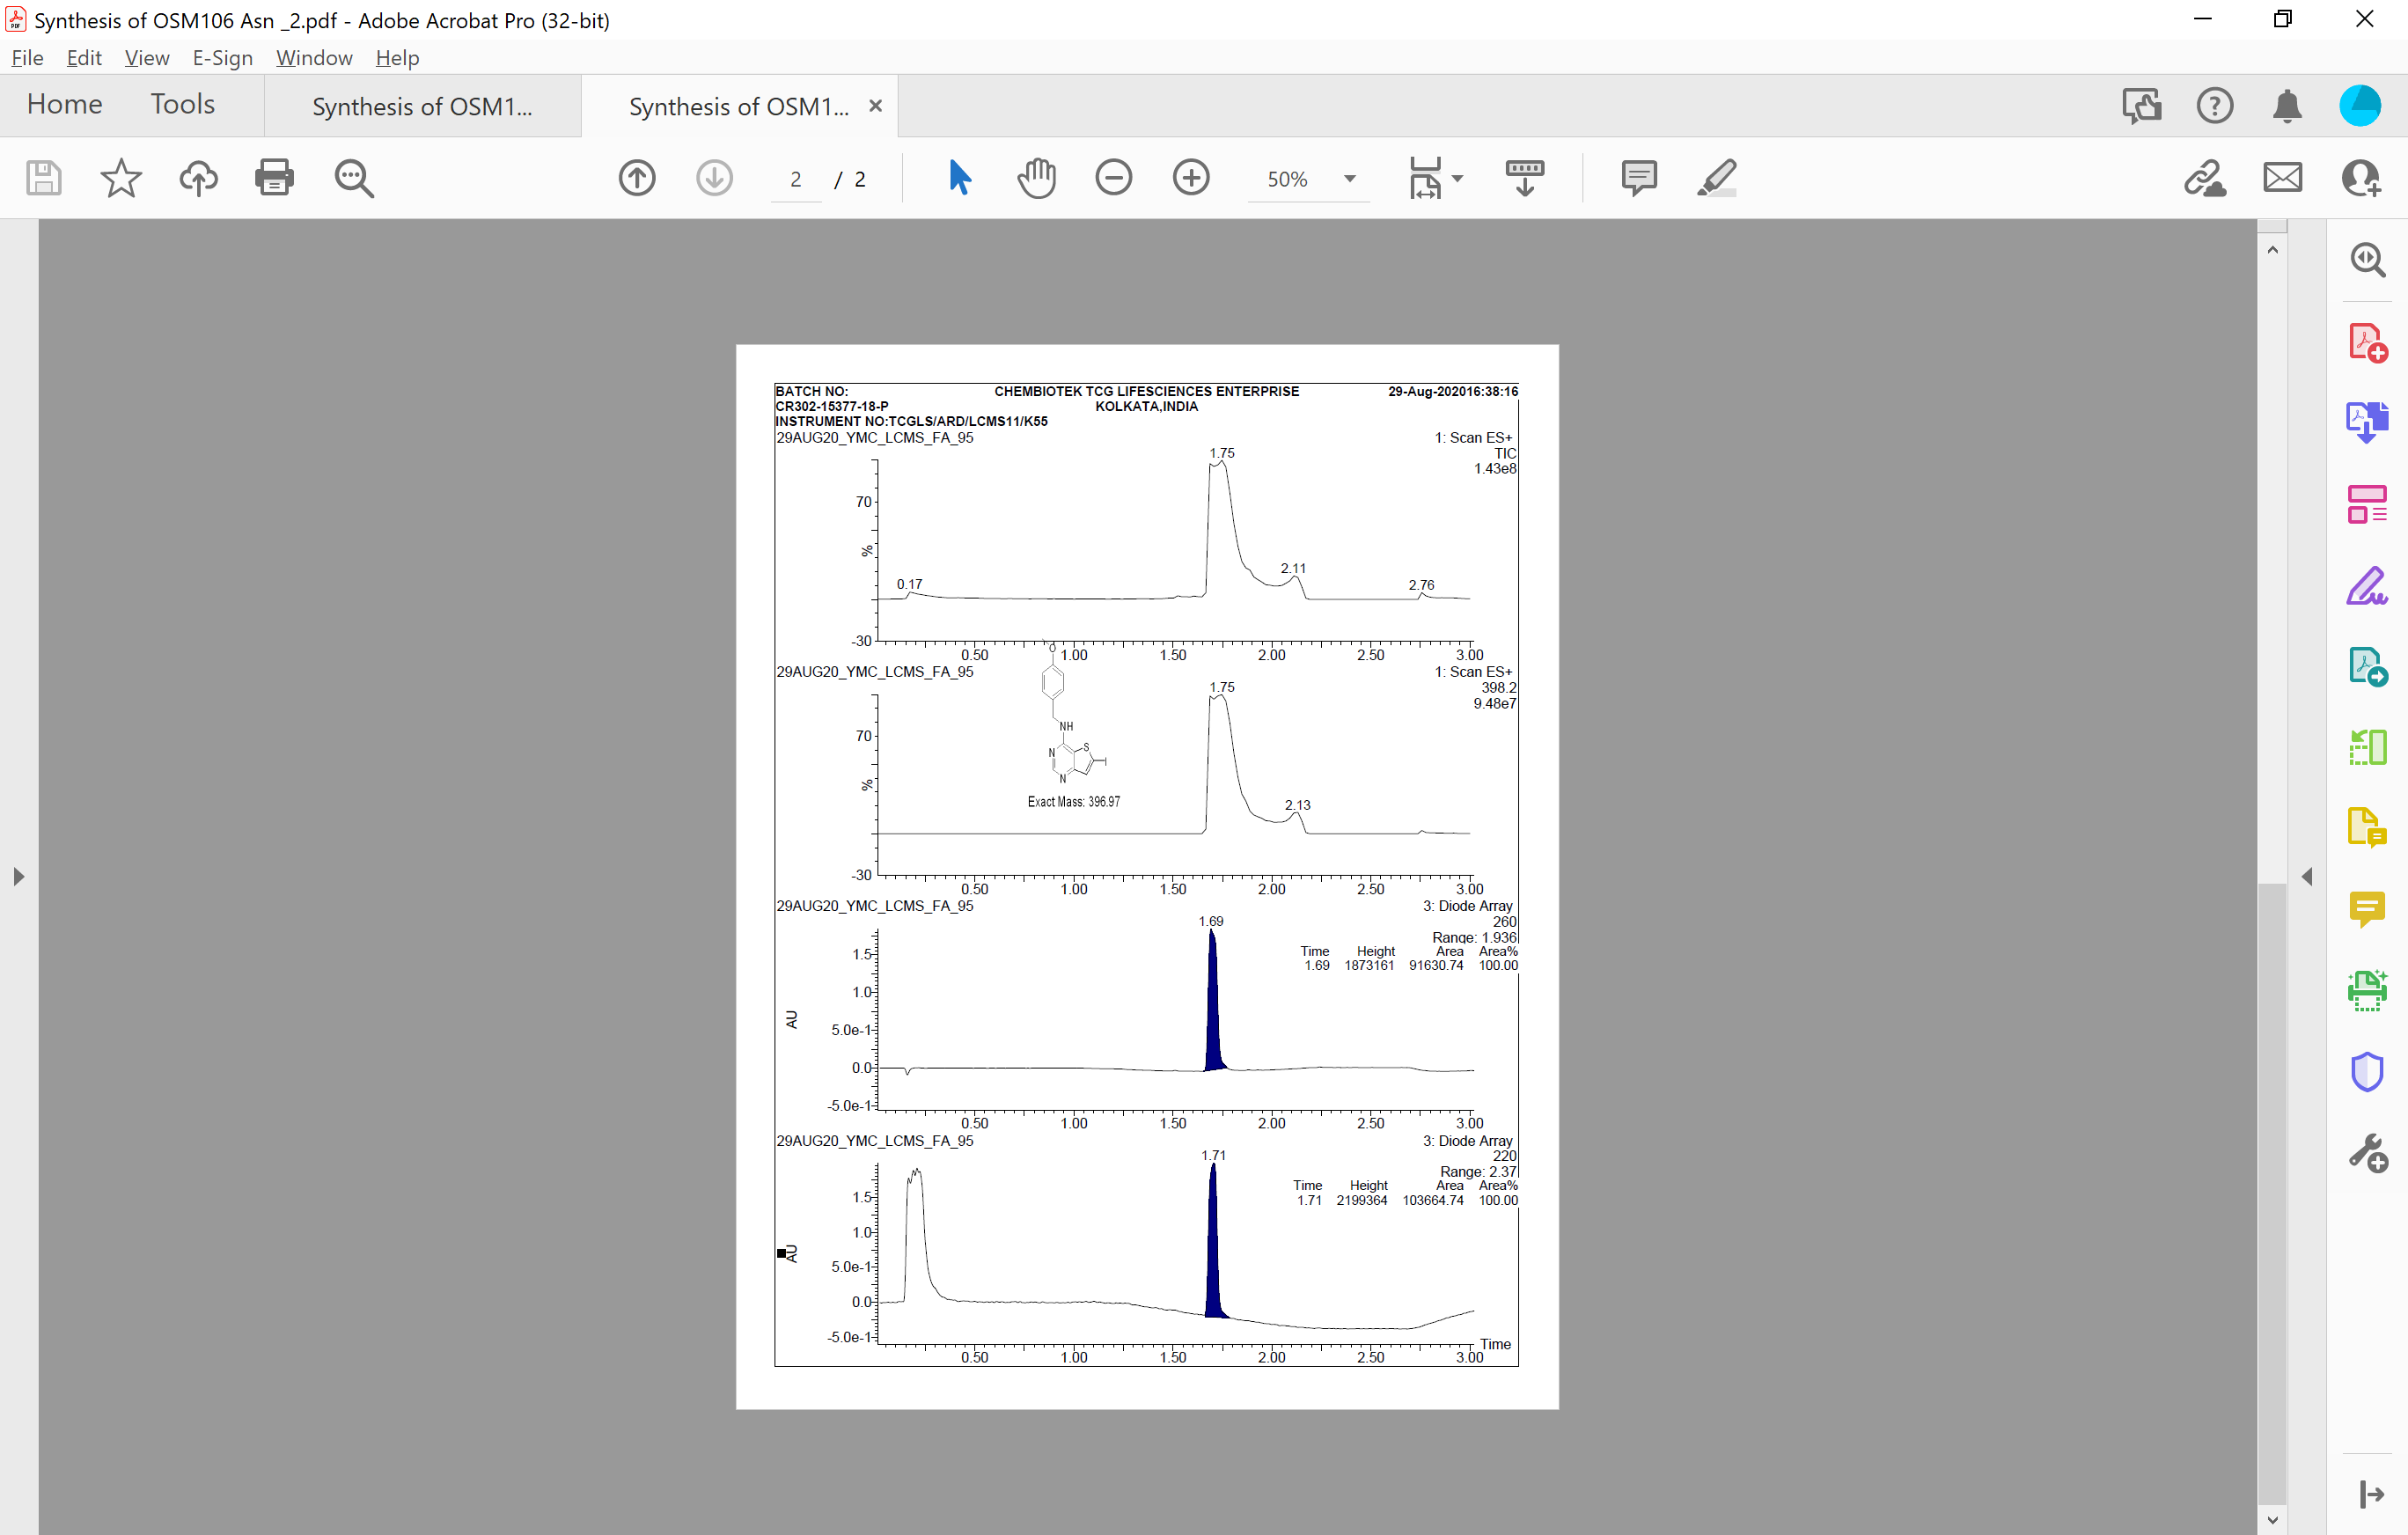

Supplement: Supplementary file 3 [file c9fa8706c99362299d2b836e.docx]
