# Supplementary material for: Reaction hijacking inhibition of Plasmodium falciparum asparagine tRNA synthetase
Source: Research Square preprint supplement (doi:10.21203/rs.3.rs-3198291/v1), 2023-07-27
Supplement: Supplementary file 4 [file d9eb291bbb13c3842d75e274.xlsx]

## Sheet: Sheet1
Supplementary Data B. Per-sample SNV and INDEL calls in core genes in the OSM-106-selected parasite samples that were whole genome sequenced. Variants were annotated with SnpEff to predict mutation effects on resulting protein.
Parasite Clone Name	Parasite Genetic Background	Chromosome	Position	Gene Name	Gene Description	GATK Quality Score	Ref Base	Alt Base	Type	Effect	Impact	Codon Change	Amino Acid Change
OSM-S-106-Dd2-2A6	Dd2	Pf3D7_01_v3	141008	PF3D7_0103200	nucleoside transporter 4 (NT4)	17182.5	T	A	SNP	missense_variant	MISSENSE	cAt/cTt	p.His320Leu/c.959A>T
		Pf3D7_02_v3	476702	PF3D7_0211800	asparagine--tRNA ligase, putative	30240.2	A	T	SNP	missense_variant	MISSENSE	agA/agT	p.Arg487Ser/c.1461A>T
		Pf3D7_12_v3	375180	PF3D7_1208100	conserved Plasmodium protein, unknown function	506.56	AATAT	A	INDEL	intron_variant			c.13112+35_13112+38delATAT
		Pf3D7_14_v3	992571	PF3D7_1425400	DEAD/DEAH box helicase, putative	1450.45	A	AGGGATTGTCAAGGTGCAGGTATCT	INDEL	disruptive_inframe_insertion		att/aGGGATTGTCAAGGTGCAGGTATCTtt	p.Ile1118delinsArgAspCysGlnGlyAlaGlyIlePhe/c.3352_3353insGGGATTGTCAAGGTGCAGGTATCT
		Pf3D7_14_v3	2880373	PF3D7_1470400	mitochondrial pyruvate carrier protein 2, putative (MPC2)	9057.11	AT	A	INDEL	intron_variant			c.298+19delA
OSM-S-106-Dd2-2A9	Dd2	Pf3D7_02_v3	476702	PF3D7_0211800	asparagine--tRNA ligase, putative	30240.2	A	T	SNP	missense_variant	MISSENSE	agA/agT	p.Arg487Ser/c.1461A>T
		Pf3D7_12_v3	375180	PF3D7_1208100	conserved Plasmodium protein, unknown function	506.56	AATAT	A	INDEL	intron_variant			c.13112+35_13112+38delATAT
		Pf3D7_14_v3	2880373	PF3D7_1470400	mitochondrial pyruvate carrier protein 2, putative (MPC2)	9057.11	AT	A	INDEL	intron_variant			c.298+19delA
OSM-S-106-Dd2-2B2	Dd2	Pf3D7_01_v3	141008	PF3D7_0103200	nucleoside transporter 4 (NT4)	17182.5	T	A	SNP	missense_variant	MISSENSE	cAt/cTt	p.His320Leu/c.959A>T
		Pf3D7_02_v3	476702	PF3D7_0211800	asparagine--tRNA ligase, putative	30240.2	A	T	SNP	missense_variant	MISSENSE	agA/agT	p.Arg487Ser/c.1461A>T
		Pf3D7_14_v3	992571	PF3D7_1425400	DEAD/DEAH box helicase, putative	1450.45	A	AGGGATTGTCAAGGTGCAGGTATCT	INDEL	disruptive_inframe_insertion		att/aGGGATTGTCAAGGTGCAGGTATCTtt	p.Ile1118delinsArgAspCysGlnGlyAlaGlyIlePhe/c.3352_3353insGGGATTGTCAAGGTGCAGGTATCT
		Pf3D7_14_v3	2880373	PF3D7_1470400	mitochondrial pyruvate carrier protein 2, putative (MPC2)	9057.11	AT	A	INDEL	intron_variant			c.298+19delA
OSM-S-106-Dd2-2D6	Dd2	Pf3D7_01_v3	141008	PF3D7_0103200	nucleoside transporter 4 (NT4)	17182.5	T	A	SNP	missense_variant	MISSENSE	cAt/cTt	p.His320Leu/c.959A>T
		Pf3D7_02_v3	476702	PF3D7_0211800	asparagine--tRNA ligase, putative	30240.2	A	T	SNP	missense_variant	MISSENSE	agA/agT	p.Arg487Ser/c.1461A>T
		Pf3D7_07_v3	1261339	PF3D7_0729700	conserved Plasmodium protein, unknown function	542.48	CAT	C	INDEL	intron_variant			c.1304-82_1304-81delAT
		Pf3D7_12_v3	375180	PF3D7_1208100	conserved Plasmodium protein, unknown function	506.56	AATAT	A	INDEL	intron_variant			c.13112+35_13112+38delATAT
		Pf3D7_14_v3	992571	PF3D7_1425400	DEAD/DEAH box helicase, putative	1450.45	A	AGGGATTGTCAAGGTGCAGGTATCT	INDEL	disruptive_inframe_insertion		att/aGGGATTGTCAAGGTGCAGGTATCTtt	p.Ile1118delinsArgAspCysGlnGlyAlaGlyIlePhe/c.3352_3353insGGGATTGTCAAGGTGCAGGTATCT
		Pf3D7_14_v3	2880373	PF3D7_1470400	mitochondrial pyruvate carrier protein 2, putative (MPC2)	9057.11	AT	A	INDEL	intron_variant			c.298+19delA
OSM-S-106-Dd2-3-E5	Dd2	Pf3D7_01_v3	142156	PF3D7_0103200	nucleoside transporter 4	7707.46	T	A	SNP	missense_variant	MISSENSE	Agt/Tgt	p.Ser22Cys/c.64A>T
		Pf3D7_01_v3	424461	PF3D7_0111000	kinesin-8, putative	4289.15	T	A	SNP	missense_variant	MISSENSE	Atg/Ttg	p.Met1039Leu/c.3115A>T
		Pf3D7_08_v3	146686	PF3D7_0802000	glutamate dehydrogenase, putative	6071.46	G	T	SNP	missense_variant	MISSENSE	Gat/Tat	p.Asp200Tyr/c.598G>T
		Pf3D7_10_v3	362125	PF3D7_1008700	tubulin beta chain	8895.42	T	TATAG	INDEL	intron_variant			c.97-92_97-91insCTAT
		Pf3D7_11_v3	619951	PF3D7_1116400	guanine nucleotide-exchange factor SEC12	4990.42	C	CT	INDEL	frameshift_variant		aga/aAga	p.Arg467fs/c.1399dupA
		Pf3D7_13_v3	1820101	PF3D7_1345400	conserved Plasmodium protein, unknown function	4316.15	A	C	SNP	missense_variant	MISSENSE	aaT/aaG	p.Asn400Lys/c.1200T>G
		Pf3D7_14_v3	3100985	PF3D7_1475400	cysteine repeat modular protein 4	6114.42	TA	T	INDEL	frameshift_variant		tat/	p.Tyr1266fs/c.3796delT
OSM-S-106-Dd2-3-H7	Dd2	Pf3D7_01_v3	142156	PF3D7_0103200	nucleoside transporter 4	7707.46	T	A	SNP	missense_variant	MISSENSE	Agt/Tgt	p.Ser22Cys/c.64A>T
		Pf3D7_08_v3	146686	PF3D7_0802000	glutamate dehydrogenase, putative	6071.46	G	T	SNP	missense_variant	MISSENSE	Gat/Tat	p.Asp200Tyr/c.598G>T
		Pf3D7_10_v3	362125	PF3D7_1008700	tubulin beta chain	8895.42	T	TATAG	INDEL	intron_variant			c.97-92_97-91insCTAT
		Pf3D7_11_v3	619951	PF3D7_1116400	guanine nucleotide-exchange factor SEC12	4990.42	C	CT	INDEL	frameshift_variant		aga/aAga	p.Arg467fs/c.1399dupA
		Pf3D7_12_v3	468659	PF3D7_1210400	general transcription factor 3C polypeptide 5, putative	871.15	T	G	SNP	missense_variant	MISSENSE	Att/Ctt	p.Ile217Leu/c.649A>C
		Pf3D7_12_v3	1996094	PF3D7_1248700	conserved Plasmodium protein, unknown function	1970.11	AGAAGAAGAG	A	INDEL	disruptive_inframe_deletion		gaggaagaagaa/gaa	p.Glu444_Glu446del/c.1329_1337delGGAAGAAGA
		Pf3D7_14_v3	3100985	PF3D7_1475400	cysteine repeat modular protein 4	6114.42	TA	T	INDEL	frameshift_variant		tat/	p.Tyr1266fs/c.3796delT
